# Supplementary material for: Phosphine-catalyzed activation of cyclopropenones: a versatile C3 synthon for (3+2) annulations with unsaturated electrophiles
Source: Royal Society of Chemistry journal article supplement (doi:10.1039/d2sc04092a), 2022-01-01

## Electronic Supplementary Information

# Phosphine-Catalyzed Activation of Cyclopropenones: A Versatile C3 Synthon for (3+2) Annulations with Unsaturated Electrophiles

Xin He<sup>a</sup>, Pengchen Ma<sup>a,b</sup>, Yuhai Tang<sup>a</sup>, Jing Li<sup>a</sup>, Shenyu Shen<sup>a</sup>, Martin J. Lear<sup>c</sup>, K. N. Houk<sup>b,\*</sup>, Silong Xu<sup>a,\*</sup>

<sup>a</sup> School of Chemistry, and Xi'an Key Laboratory of Sustainable Energy Materials Chemistry, Xi'an Jiaotong University, Xi'an 710049, P. R. China

<sup>b</sup> Department of Chemistry and Biochemistry, University of California, Los Angeles, California 90095-1569, U.S.A.

<sup>c</sup> School of Chemistry, University of Lincoln, Brayford Pool, Lincoln, LN6 7TS UK  
Email: [houk@chem.ucla.edu](mailto:houk@chem.ucla.edu); [silongxu@mail.xjtu.edu.cn](mailto:silongxu@mail.xjtu.edu.cn)

## Table of Contents

|                                                                                                          |     |
|----------------------------------------------------------------------------------------------------------|-----|
| 1. General Information .....                                                                             | S2  |
| 2. Synthesis of Compounds <b>3</b> , <b>4</b> , <b>6</b> , <b>8</b> , and Analytical Data .....          | S2  |
| 2.1 General Procedure for the Synthesis of Compounds <b>3</b> , <b>4</b> , <b>6</b> , and <b>8</b> ..... | S2  |
| 2.2 Analytical Data for Compounds <b>3</b> , <b>4</b> , <b>6</b> , and <b>8</b> .....                    | S3  |
| 3. Synthesis of Compounds <b>10</b> , <b>12</b> and Analytical Data .....                                | S23 |
| 3.1 Optimization of Reaction Conditions .....                                                            | S23 |
| 3.2 General Procedure for the Synthesis of Compounds <b>10</b> and <b>12</b> .....                       | S24 |
| 3.2 Analytical Data for Compounds <b>10</b> and <b>12</b> .....                                          | S25 |
| 4. X-ray Crystallographic Data of <b>3v</b> , <b>10e</b> and <b>12a</b> .....                            | S40 |
| 5. HRMS and <sup>31</sup> P NMR Tracking Experiments .....                                               | S46 |
| 6. Computational Details .....                                                                           | S47 |
| 7. References .....                                                                                      | S63 |
| 8. NMR Spectra Copies .....                                                                              | S66 |

## 1. General Information

Unless otherwise noted, all reactions were performed in nitrogen atmosphere under anhydrous conditions using standard Schlenk techniques. Diphenylcyclopropanone **1a** was purchased from commercial sources; other cyclopropanones were prepared according to reported methods.<sup>1</sup> Solvents were purified prior to use according to standard procedures. <sup>1</sup>H, <sup>13</sup>C and <sup>19</sup>F NMR spectra were recorded on a Bruker AV600/JEOL 400 spectrometer. Chemical shifts ( $\delta$  values) were reported in ppm with TMS (<sup>1</sup>H NMR) and CDCl<sub>3</sub> (<sup>13</sup>C NMR) as internal standard, respectively. CDCl<sub>3</sub> was treated with anhydrous K<sub>2</sub>CO<sub>3</sub> before using. Peak multiplicities are reported as follows: s = singlet, d = doublet, t = triplet, q = quartet, dd = doublet of doublets, hept = heptet, m = multiplet. High-resolution ESI mass spectra were determined on WATERS I-Class VION IMS Q ToF LC/MS. IR data were measured on a Nicolet iS10 FT-IR spectrometer. Melting points were measured on an SGW<sup>®</sup> X-4B apparatus and uncorrected. All reactions were monitored by thin layer chromatography (TLC) and visualized by UV irradiation under 254 nm or 365 nm, or stained with potassium permanganate. X-ray crystallographic analysis was performed at Bruker D8 Quest. Flash column chromatography was performed over silica gel or alumina, using petroleum ether (60–90 °C)/ethyl acetate as the eluent.

## 2. Synthesis of Compounds **3**, **4**, **6**, **8**, and Analytical Data

### 2.1 General Procedure for the Synthesis of Compounds **3**, **4**, **6**, and **8**

Under N<sub>2</sub> atmosphere, PMe<sub>3</sub> (1 M in THF, 20  $\mu$ L, 0.02 mmol) was added to a dispersion of cyclopropanone (0.3 mmol), 4 Å molecular sieves (100 mg), and aldehyde (0.2 mmol) in anhydrous dichloromethane (DCM) (2.0 mL). The mixture was stirred at room temperature and the reaction was monitored by TLC. When the reaction finished, the solvent was evaporated in *vacuo* and the residue was purified by silica gel column chromatography with petroleum ether/ethyl acetate as eluent to afford the corresponding products **3**, **4**, **6**, and **8**. The analytical

data are provided as follows. Compounds **3a–d**, **3g–h**, **3l**, **3q**, **3w–y**, **3ab**, **4**, and **8a** are known, and the analytical data are consistent with those reported.<sup>2–9</sup>

## 2.2 Analytical Data for Compounds 3, 4, 6, and 8

### 3,4,5-triphenylfuran-2(5H)-one (**3a**)<sup>2</sup>

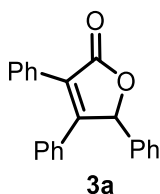

Following the general procedure, the reaction of 2,3-diphenylcycloprop-2-en-1-one **1a** (62.1 mg, 0.3 mmol) and benzaldehyde **2a** (21  $\mu$ L, 0.2 mmol) with  $\text{PMe}_3$  (1 M in THF, 20  $\mu$ L, 0.02 mmol) was conducted for 40 minutes which produced **3a** in 61.7 mg, 99% yield, as white solid. <sup>1</sup>H NMR (400 MHz,  $\text{CDCl}_3$ ):  $\delta$  = 7.50 – 7.46 (m, 2H), 7.36 – 7.32 (m, 3H), 7.31 – 7.27 (m, 5H), 7.26 – 7.22 (m, 1H), 7.21 – 7.15 (m, 2H), 7.12 – 7.09 (m, 2H), 6.26 (s, 1H).

### 3,4-diphenyl-5-(*p*-tolyl) furan-2(5H)-one (**3b**)<sup>2</sup>

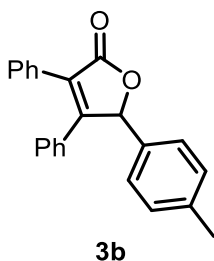

Following the general procedure, the reaction of 2,3-diphenylcycloprop-2-en-1-one **1a** (62.0 mg, 0.3 mmol) and 4-methylbenzaldehyde **2b** (24  $\mu$ L, 0.2 mmol) with  $\text{PMe}_3$  (1 M in THF, 20  $\mu$ L, 0.02 mmol) was conducted for 3 hours which produced **3b** in 62.1 mg, 95% yield, as pale-yellow solid.

<sup>1</sup>H NMR (400 MHz,  $\text{CDCl}_3$ ):  $\delta$  = 7.50 – 7.43 (m, 2H), 7.38 – 7.30 (m, 3H), 7.27 – 7.16 (m, 5H), 7.13 – 7.07 (m, 4H), 6.23 (s, 1H), 2.29 (s, 3H).

### 3,4-diphenyl-5-(*m*-tolyl) furan-2(5*H*)-one (**3c**)<sup>2</sup>

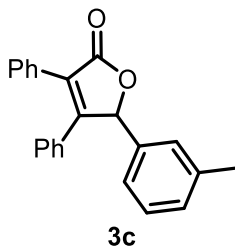

Following the general procedure, the reaction of 2,3-diphenylcycloprop-2-en-1-one **1a** (62.1 mg, 0.3 mmol) and 3-methylbenzaldehyde **2c** (24  $\mu$ L, 0.2 mmol) with  $\text{PMe}_3$  (1 M in THF, 20  $\mu$ L, 0.02 mmol) was conducted for 3 hours which produced **3c** in 59.5 mg, 91% yield, as pale-yellow solid.

**<sup>1</sup>H NMR** (400 MHz,  $\text{CDCl}_3$ ):  $\delta$  = 7.53 – 7.45 (m, 2H), 7.37 – 7.32 (m, 3H), 7.28 – 7.24 (m, 1H), 7.22 – 7.16 (m, 3H), 7.13 – 7.05 (m, 5H), 6.21 (s, 1H), 2.29 (s, 3H).

### 3,4-diphenyl-5-(*o*-tolyl) furan-2(5*H*)-one (**3d**)<sup>2</sup>

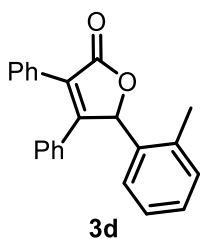

Following the general procedure, the reaction of 2,3-diphenylcycloprop-2-en-1-one **1a** (61.8 mg, 0.3 mmol) and 2-methylbenzaldehyde **2d** (24  $\mu$ L, 0.2 mmol) with  $\text{PMe}_3$  (1 M in THF, 20  $\mu$ L, 0.02 mmol) was conducted for 3 hours which produced **3d** in 60.7 mg, 93% yield, as pale-yellow solid.

**<sup>1</sup>H NMR** (400 MHz,  $\text{CDCl}_3$ ):  $\delta$  = 7.50 – 7.46 (m, 2H), 7.37 – 7.32 (m, 3H), 7.27 – 7.23 (m, 1H), 7.22 – 7.16 (m, 4H), 7.12 – 7.06 (m, 4H), 6.54 (s, 1H), 2.44 (s, 3H).

### 5-(4-(*tert*-butyl) phenyl)-3,4-diphenylfuran-2(5*H*)-one (**3e**)

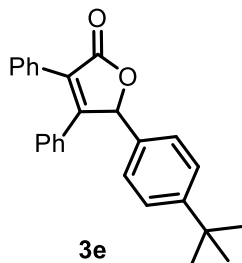

Following the general procedure, the reaction of 2,3-diphenylcycloprop-2-en-1-one **1a** (61.8 mg, 0.3 mmol) and 4-(*tert*-butyl) benzaldehyde **2e** (32.5 mg, 0.2 mmol) with  $\text{PMe}_3$  (1 M in THF, 20  $\mu\text{L}$ , 0.02 mmol) was conducted for 3 hours which produced **3e** in 64.8 mg, 88% yield, as pale-yellow solid, m.p. 120 – 123 °C.

**$^1\text{H NMR}$**  (400 MHz,  $\text{CDCl}_3$ ):  $\delta$  = 7.49 – 7.42 (m, 2H), 7.36 – 7.31 (m, 5H), 7.28 – 7.24 (m, 2H), 7.22 – 7.17 (m, 3H), 7.15 – 7.11 (m, 2H), 6.26 (s, 1H), 1.26 (s, 9H);  **$^{13}\text{C NMR}$**  (100 MHz,  $\text{CDCl}_3$ ):  $\delta$  = 172.6, 159.2, 152.5, 131.8, 131.3, 130.1, 130.0, 129.5, 128.9, 128.8, 128.7, 128.5, 127.5, 127.1, 126.0, 83.6, 34.7, 31.3; **FTIR** (neat):  $\nu$  2960, 1736, 1445, 1350, 1160, 1003, 783, 692  $\text{cm}^{-1}$ ; **HRMS** (ESI) calcd for  $\text{C}_{26}\text{H}_{24}\text{O}_2[\text{M} + \text{Na}]^+$ : 391.1668, found: 391.1668.

#### 5-(3,4-dimethylphenyl)-3,4-diphenylfuran-2(5H)-one (**3f**)

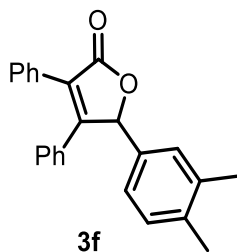

Following the general procedure, the reaction of 2,3-diphenylcycloprop-2-en-1-one **1a** (62.0 mg, 0.3 mmol) and 3,4-dimethylbenzaldehyde **2f** (26.9 mg, 0.2 mmol) with  $\text{PMe}_3$  (1 M in THF, 20  $\mu\text{L}$ , 0.02 mmol) was conducted for 1 hour which produced **3f** in 61.9 mg, 91% yield, as white solid, m.p. 102 – 105 °C.

**$^1\text{H NMR}$**  (400 MHz,  $\text{CDCl}_3$ ):  $\delta$  = 7.50 – 7.46 (m, 2H), 7.38 – 7.31 (m, 3H), 7.28 – 7.23 (m, 1H), 7.22 – 7.17 (m, 2H), 7.14 – 7.10 (m, 2H), 7.08 – 7.04 (m, 2H), 7.03 – 6.96 (m, 1H), 6.20 (s, 1H), 2.20 (s, 6H);  **$^{13}\text{C NMR}$**  (100 MHz,  $\text{CDCl}_3$ ):  $\delta$  = 172.7, 159.4, 138.1, 137.4, 132.1, 131.3, 130.2, 130.1, 129.9, 129.6, 128.9, 128.83, 128.75, 128.7, 128.5, 126.9, 125.3, 83.8, 19.9, 19.7;

**FTIR** (neat)  $\nu$  2918, 1745, 1444, 1297, 1155, 998, 692  $\text{cm}^{-1}$ ; **HRMS** (ESI) calcd for  $\text{C}_{24}\text{H}_{20}\text{O}_2[\text{M} + \text{Na}]^+$ : 363.1356, found: 363.1358.

**5-(3-methoxyphenyl)-3,4-diphenylfuran-2(5H)-one (3g)<sup>3</sup>**

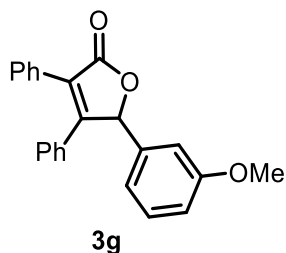

Following the general procedure, the reaction of 2,3-diphenylcycloprop-2-en-1-one **1a** (62.0 mg, 0.3 mmol) and 3-methoxybenzaldehyde **2g** (25  $\mu\text{L}$ , 0.2 mmol) with  $\text{PMe}_3$  (1 M in THF, 20  $\mu\text{L}$ , 0.02 mmol) was conducted for 2 hours which produced **3g** in 62.3 mg, 91% yield, as white solid.

**<sup>1</sup>H NMR** (400 MHz,  $\text{CDCl}_3$ ):  $\delta$  = 7.50 – 7.45 (m, 2H), 7.38 – 7.32 (m, 3H), 7.30 – 7.26 (m, 1H), 7.24 – 7.18 (m, 3H), 7.14 – 7.09 (m, 2H), 6.91 – 6.79 (m, 3H), 6.22 (s, 1H), 3.74 (s, 3H).

**5-(4-methoxyphenyl)-3,4-diphenylfuran-2(5H)-one (3h)<sup>2</sup>**

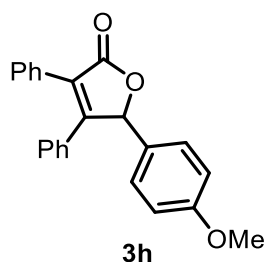

Following the general procedure, the reaction of 2,3-diphenylcycloprop-2-en-1-one **1a** (62.0 mg, 0.3 mmol) and 4-methoxybenzaldehyde **2h** (25  $\mu\text{L}$ , 0.2 mmol) with  $\text{PMe}_3$  (1 M in THF, 20  $\mu\text{L}$ , 0.02 mmol) was conducted for 2 hours which produced **3h** in 65.7 mg, 96% yield, as white solid.

**<sup>1</sup>H NMR** (400 MHz, CDCl<sub>3</sub>): δ = 7.47 (dd, *J* = 6.7, 3.0 Hz, 2H), 7.37 – 7.32 (m, 3H), 7.24 – 7.17 (m, 5H), 7.13 – 7.09 (m, 2H), 6.86 – 6.80 (m, 2H), 6.23 (s, 1H), 3.74 (s, 3H).

**3,4-diphenyl-5-(4-(trifluoromethoxy) phenyl) furan-2(5*H*)-one (3i)**

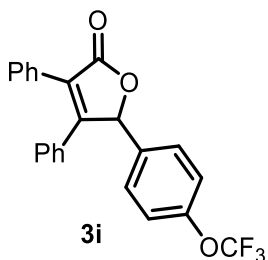

Following the general procedure, the reaction of 2,3-diphenylcycloprop-2-en-1-one **1a** (61.9 mg, 0.3 mmol) and 4-(trifluoromethoxy) benzaldehyde **2i** (29 μL, 0.2 mmol) with PMe<sub>3</sub> (1 M in THF, 20 μL, 0.02 mmol) was conducted for 2 hours which produced **3i** in 55.5 mg, 70% yield, as pale-yellow solid, m.p. 135 – 138 °C.

**<sup>1</sup>H NMR** (400 MHz, CDCl<sub>3</sub>): δ = 7.51 – 7.43 (m, 2H), 7.37 – 7.26 (m, 6H), 7.25 – 7.20 (m, 2H), 7.19 – 7.07 (m, 4H), 6.30 (s, 1H); **<sup>13</sup>C NMR** (100 MHz, CDCl<sub>3</sub>): δ = 172.3, 159.1, 149.8, 133.6, 130.9, 130.2, 129.6, 129.5, 129.3, 129.1, 129.0, 128.7, 128.4, 127.2, 121.3, 120.4 (q, *J* = 257.9 Hz), 82.7; **<sup>19</sup>F NMR** (376 MHz, CDCl<sub>3</sub>): δ = -57.8; **FTIR** (neat) ν 1749, 1443, 1257, 1159, 1004, 692 cm<sup>-1</sup>; **HRMS** (ESI) calcd for C<sub>23</sub>H<sub>15</sub>F<sub>3</sub>O<sub>3</sub>[M + Na]<sup>+</sup>: 419.0866, found: 419.0870.

**2-(5-oxo-3,4-diphenyl-2,5-dihydrofuran-2-yl) phenyl acetate (3j)**

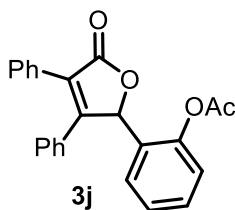

Following the general procedure, the reaction of 2,3-diphenylcycloprop-2-en-1-one **1a** (62.1 mg, 0.3 mmol) and 2-formylphenyl acetate **2j** (32.8 mg, 0.2 mmol) with PMe<sub>3</sub> (1 M in THF, 20 μL, 0.02 mmol) was conducted for 40 minutes which produced **3j** in 43.7 mg, 59% yield, as pale-yellow solid, m.p. 123 – 126 °C.

**<sup>1</sup>H NMR** (400 MHz, CDCl<sub>3</sub>): δ = 7.50 – 7.45 (m, 2H), 7.38 – 7.33 (m, 4H), 7.30 – 7.26 (m, 1H), 7.24 – 7.14 (m, 5H), 7.12 – 7.08 (m, 2H), 6.42 (s, 1H), 2.28 (s, 3H); **<sup>13</sup>C NMR** (100 MHz, CDCl<sub>3</sub>): δ = 172.5, 168.9, 158.7, 149.6, 131.0, 130.6, 130.2, 129.9, 129.5, 129.4, 129.0, 128.9, 128.7, 128.3, 127.3, 126.4, 126.2, 123.6, 79.4, 21.2; **FTIR** (neat) u 2942, 1716, 1510, 1246, 1170, 1028, 829 cm<sup>-1</sup>; **HRMS** (ESI) calcd for C<sub>24</sub>H<sub>18</sub>O<sub>4</sub>[M + Na]<sup>+</sup>: 393.1097, found: 393.1103.

#### 5-(4-fluorophenyl)-3,4-diphenylfuran-2(5H)-one (**3k**)

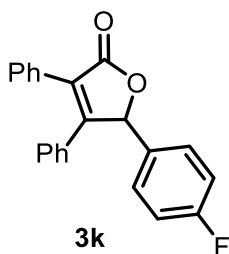

Following the general procedure, the reaction of 2,3-diphenylcycloprop-2-en-1-one **1a** (61.8 mg, 0.3 mmol) and 4-fluorobenzaldehyde **2k** (22 μL, 0.2 mmol) with PMe<sub>3</sub> (1 M in THF, 20 μL, 0.02 mmol) was conducted for 2 hours which produced **3k** in 56.8 mg, 86% yield, as pale-yellow solid, m.p. 108 – 110 °C.

**<sup>1</sup>H NMR** (400 MHz, CDCl<sub>3</sub>): δ = 7.51 – 7.44 (m, 2H), 7.38 – 7.32 (m, 3H), 7.30 – 7.25 (m, 3H), 7.24 – 7.18 (m, 2H), 7.13 – 7.08 (m, 2H), 7.03 – 6.96 (m, 2H), 6.27 (s, 1H); **<sup>13</sup>C NMR** (100 MHz, CDCl<sub>3</sub>): δ = 172.4, 163.2 (d, *J* = 248.7 Hz), 159.2, 131.0, 130.8 (d, *J* = 3.7 Hz), 130.1, 129.7, 129.6 (d, *J* = 8.5 Hz), 129.5, 129.0, 128.9, 128.7, 128.4, 127.0, 116.1 (d, *J* = 21.8 Hz), 82.9; **<sup>19</sup>F NMR** (376 MHz, CDCl<sub>3</sub>): δ = -111.5; **FTIR** (neat) u 1750, 1508, 1226, 1154, 1009, 837, 784, 697 cm<sup>-1</sup>; **HRMS** (ESI) calcd for C<sub>22</sub>H<sub>15</sub>FO<sub>2</sub>[M + Na]<sup>+</sup>: 353.0948, found: 353.0946.

#### 5-(4-chlorophenyl)-3,4-diphenylfuran-2(5H)-one (**3l**)<sup>3</sup>



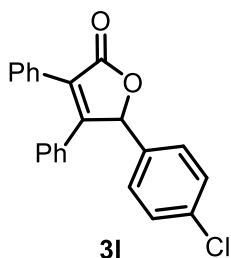

Following the general procedure, the reaction of 2,3-diphenylcycloprop-2-en-1-one **1a** (61.7 mg, 0.3 mmol) and 4-chlorobenzaldehyde **2l** (28.3 mg, 0.2 mmol) with  $\text{PMe}_3$  (1 M in THF, 20  $\mu\text{L}$ , 0.02 mmol) was conducted for 2 hours which produced **3l** in 46.5 mg, 67% yield, as white solid.

**$^1\text{H NMR}$**  (400 MHz,  $\text{CDCl}_3$ ):  $\delta$  = 7.50 – 7.44 (m, 2H), 7.38 – 7.33 (m, 3H), 7.31 – 7.27 (m, 3H), 7.25 – 7.20 (m, 4H), 7.14 – 7.08 (m, 2H), 6.25 (s, 1H).

#### 5-(3-chlorophenyl)-3,4-diphenylfuran-2(5H)-one (**3m**)

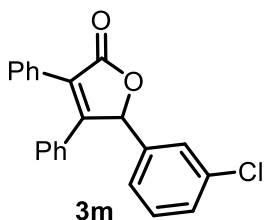

Following the general procedure, the reaction of 2,3-diphenylcycloprop-2-en-1-one **1a** (62.2 mg, 0.3 mmol) and 3-chlorobenzaldehyde **2m** (23  $\mu\text{L}$ , 0.2 mmol) with  $\text{PMe}_3$  (1 M in THF, 20  $\mu\text{L}$ , 0.02 mmol) was conducted for 1 hour which produced **3m** in 57.6 mg, 83% yield, as pale-yellow solid, m.p. 111 – 114  $^\circ\text{C}$ .

**$^1\text{H NMR}$**  (400 MHz,  $\text{CDCl}_3$ ):  $\delta$  = 7.50 – 7.45 (m, 2H), 7.38 – 7.34 (m, 3H), 7.32 – 7.27 (m, 3H), 7.26 – 7.21 (m, 3H), 7.16 (dt,  $J$  = 7.2, 1.4 Hz, 1H), 7.14 – 7.09 (m, 2H), 6.23 (s, 1H);  **$^{13}\text{C NMR}$**  (100 MHz,  $\text{CDCl}_3$ ):  $\delta$  = 172.3, 159.0, 136.9, 134.9, 130.8, 130.3, 130.2, 129.7, 129.6, 129.5, 129.1, 129.0, 128.7, 128.4, 127.7, 127.1, 125.9, 82.8; **FTIR** (neat)  $\nu$  2978, 1751, 1399, 1241, 1067, 878, 692  $\text{cm}^{-1}$ ; **HRMS** (ESI) calcd for  $\text{C}_{22}\text{H}_{15}\text{ClO}_2[\text{M} + \text{Na}]^+$ : 369.0653, found: 369.0654.

#### 5-(3,5-dichlorophenyl)-3,4-diphenylfuran-2(5H)-one (**3n**)

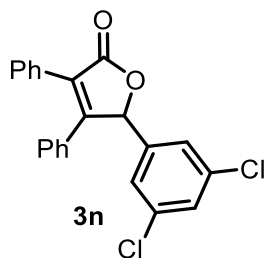

Following the general procedure, the reaction of 2,3-diphenylcycloprop-2-en-1-one **1a** (61.9 mg, 0.3 mmol) and 3,5-dichlorobenzaldehyde **2n** (35.0 mg, 0.2 mmol) with  $\text{PMe}_3$  (1 M in THF, 20  $\mu\text{L}$ , 0.02 mmol) was conducted for 1 hour which produced **3n** in 41.9 mg, 55% yield, as pale-yellow solid, m.p. 130 – 133  $^\circ\text{C}$ .

**$^1\text{H NMR}$**  (400 MHz,  $\text{CDCl}_3$ ):  $\delta$  = 7.49 – 7.45 (m, 2H), 7.38 – 7.26 (m, 7H), 7.17 – 7.11 (m, 4H), 6.20 (s, 1H);  **$^{13}\text{C NMR}$**  (100 MHz,  $\text{CDCl}_3$ ):  $\delta$  = 172.0, 158.5, 138.4, 135.6, 130.54, 130.48, 129.7, 129.5, 129.34, 129.28, 129.2, 128.8, 128.3, 127.3, 126.1, 82.0; **FTIR** (neat)  $\nu$  2982, 1750, 1571, 1432, 1150, 1023, 963, 691  $\text{cm}^{-1}$ ; **HRMS** (ESI) calcd for  $\text{C}_{22}\text{H}_{14}\text{Cl}_2\text{O}_2[\text{M} + \text{Na}]^+$ : 403.0263, found: 403.0260.

#### 5-(4-bromophenyl)-3,4-diphenylfuran-2(5H)-one (**3o**)

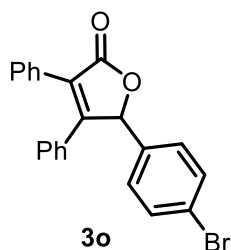

Following the general procedure, the reaction of 2,3-diphenylcycloprop-2-en-1-one **1a** (62.4 mg, 0.3 mmol) and 4-bromobenzaldehyde **2o** (37.1 mg, 0.2 mmol) with  $\text{PMe}_3$  (1 M in THF, 20  $\mu\text{L}$ , 0.02 mmol) was conducted for 2 hours which produced **3o** in 58.7 mg, 75% yield, as white solid, m.p. 133 – 136  $^\circ\text{C}$ .

**$^1\text{H NMR}$**  (400 MHz,  $\text{CDCl}_3$ ):  $\delta$  = 7.50 – 7.41 (m, 4H), 7.37 – 7.35 (m, 3H), 7.32 – 7.27 (m, 1H), 7.25 – 7.20 (m, 2H), 7.16 (dd,  $J$  = 8.8, 2.0 Hz, 2H), 7.12 – 7.08 (m, 2H), 6.24 (s, 1H);  **$^{13}\text{C NMR}$**  (100 MHz,  $\text{CDCl}_3$ ):  $\delta$  = 172.3, 159.1, 134.0, 132.3, 130.9, 130.2, 129.7, 129.5, 129.3, 129.1,

129.0, 128.7, 128.4, 127.1, 123.6, 82.9; **FTIR** (neat)  $\nu$  1748, 1487, 1299, 1154, 1002, 961, 691  $\text{cm}^{-1}$ ; **HRMS** (ESI) calcd for  $\text{C}_{22}\text{H}_{15}\text{BrO}_2[\text{M} + \text{Na}]^+$ : 413.0147, found: 413.0152.

**methyl 4-(5-oxo-3,4-diphenyl-2,5-dihydrofuran-2-yl) benzoate (3p)**

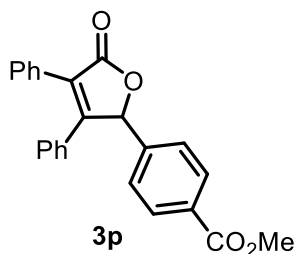

Following the general procedure, the reaction of 2,3-diphenylcycloprop-2-en-1-one **1a** (61.8 mg, 0.3 mmol) and methyl 4-formylbenzoate **2p** (32.7 mg, 0.2 mmol) with  $\text{PMe}_3$  (1 M in THF, 20  $\mu\text{L}$ , 0.02 mmol) was conducted for 30 minutes which produced **3p** in 53.2 mg, 72% yield, as white solid, m.p. 128 – 131  $^\circ\text{C}$ .

**$^1\text{H}$  NMR** (400 MHz,  $\text{CDCl}_3$ ):  $\delta$  = 8.00 – 7.96 (m, 2H), 7.50 – 7.45 (m, 2H), 7.38 – 7.33 (m, 5H), 7.31 – 7.26 (m, 1H), 7.25 – 7.19 (m, 2H), 7.12 – 7.06 (m, 2H), 6.31 (s, 1H), 3.89 (s, 3H);  **$^{13}\text{C}$  NMR** (100 MHz,  $\text{CDCl}_3$ ):  $\delta$  = 172.4, 166.5, 159.3, 139.8, 131.2, 130.9, 130.3, 130.2, 129.6, 129.5, 129.2, 129.0, 128.7, 128.3, 127.6, 127.0, 83.0, 52.4; **FTIR** (neat)  $\nu$  2980, 2372, 1755, 1402, 1250, 1068, 868  $\text{cm}^{-1}$ ; **HRMS** (ESI) calcd for  $\text{C}_{24}\text{H}_{18}\text{O}_4[\text{M} + \text{Na}]^+$ : 393.1097, found: 393.1104.

**3,4-diphenyl-5-(4-(trifluoromethyl) phenyl) furan-2(5H)-one (3q)<sup>2</sup>**

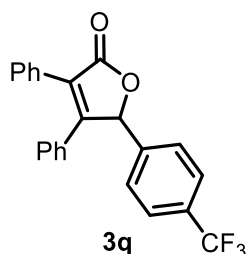

Following the general procedure, the reaction of 2,3-diphenylcycloprop-2-en-1-one **1a** (62.3 mg, 0.3 mmol) and 4-(trifluoromethyl) benzaldehyde **2q** (28  $\mu\text{L}$ , 0.2 mmol) with  $\text{PMe}_3$  (1 M in

THF, 20  $\mu$ L, 0.02 mmol) was conducted for 30 minutes which produced **3q** in 44.2 mg, 58% yield, as white solid.

**<sup>1</sup>H NMR** (400 MHz, CDCl<sub>3</sub>):  $\delta$  = 7.57 (d, *J* = 8.2 Hz, 2H), 7.49 – 7.45 (m, 2H), 7.40 (d, *J* = 8.1 Hz, 2H), 7.37 – 7.33 (m, 3H), 7.32 – 7.27 (m, 1H), 7.26 – 7.21 (m, 2H), 7.14 – 7.09 (m, 2H), 6.34 (s, 1H).

#### 5-(3-nitrophenyl)-3,4-diphenylfuran-2(5H)-one (**3r**)

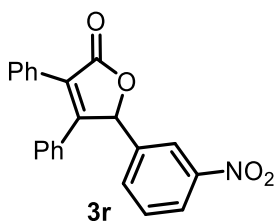

Following the general procedure, the reaction of 2,3-diphenylcycloprop-2-en-1-one **1a** (61.9 mg, 0.3 mmol) and 3-nitrobenzaldehyde **2r** (30.4 mg, 0.2 mmol) with PMe<sub>3</sub> (1 M in THF, 10  $\mu$ L, 0.01 mmol) was conducted for 30 minutes which produced **3r** in 46.6 mg, 65% yield, as pale-yellow solid, m.p. 122 – 125 °C.

**<sup>1</sup>H NMR** (400 MHz, CDCl<sub>3</sub>):  $\delta$  = 8.20 – 8.13 (m, 2H), 7.62 (dt, *J* = 7.7, 1.4 Hz, 1H), 7.53 – 7.47 (m, 3H), 7.37 – 7.34 (m, 3H), 7.32 – 7.28 (m, 1H), 7.27 – 7.22 (m, 2H), 7.16 – 7.13 (m, 2H), 6.40 (s, 1H); **<sup>13</sup>C NMR** (100 MHz, CDCl<sub>3</sub>):  $\delta$  = 172.0, 158.7, 148.5, 137.3, 133.4, 130.53, 130.49, 130.2, 129.5, 129.32, 129.27, 129.2, 128.8, 128.3, 127.4, 124.4, 122.8, 82.2; **FTIR** (neat)  $\nu$  2979, 1749, 1528, 1442, 1346, 1153, 962, 690 cm<sup>-1</sup>; **HRMS** (ESI) calcd for C<sub>22</sub>H<sub>15</sub>NO<sub>4</sub>[M + Na]<sup>+</sup>: 380.0893, found: 380.0887.

#### 5-(naphthalen-2-yl)-3,4-diphenylfuran-2(5H)-one (**3s**)

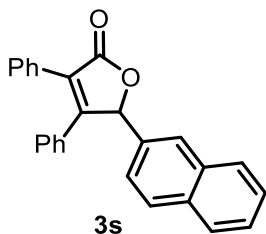

Following the general procedure, the reaction of 2,3-diphenylcycloprop-2-en-1-one **1a** (61.7 mg, 0.3 mmol) and 2-naphthaldehyde **2s** (31.3 mg, 0.2 mmol) with  $\text{PMe}_3$  (1 M in THF, 20  $\mu\text{L}$ , 0.02 mmol) was conducted for 1 hour which produced **3s** in 63.8 mg, 88% yield, as white solid, m.p. 140 – 143 °C.

**$^1\text{H NMR}$**  (400 MHz,  $\text{CDCl}_3$ ):  $\delta$  = 7.83 – 7.77 (m, 4H), 7.54 – 7.44 (m, 4H), 7.39 – 7.34 (m, 3H), 7.31 (dd,  $J$  = 8.6, 1.7 Hz, 1H), 7.23 – 7.10 (m, 5H), 6.42 (s, 1H);  **$^{13}\text{C NMR}$**  (100 MHz,  $\text{CDCl}_3$ ):  $\delta$  = 172.7, 159.5, 133.7, 133.2, 132.2, 131.2, 130.0, 129.9, 129.6, 129.2, 129.0, 128.8, 128.7, 128.4, 128.22, 128.21, 127.9, 127.1, 126.9, 126.7, 123.9, 84.0; **FTIR** (neat)  $\nu$  1759, 1444, 1270, 1149, 1009, 960, 695  $\text{cm}^{-1}$ ; **HRMS** (ESI) calcd for  $\text{C}_{26}\text{H}_{18}\text{O}_2[\text{M} + \text{Na}]^+$ : 385.1199, found: 385.1196.

### 3,4-diphenyl-[2,2'-bifuran]-5(2H)-one (**3t**)

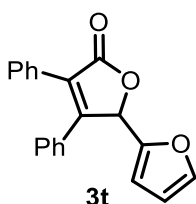

Following the general procedure, the reaction of 2,3-diphenylcycloprop-2-en-1-one **1a** (62.0 mg, 0.3 mmol) and furan-2-carbaldehyde **2t** (17  $\mu\text{L}$ , 0.2 mmol) with  $\text{PMe}_3$  (1 M in THF, 10  $\mu\text{L}$ , 0.01 mmol) was conducted for 40 minutes which produced **3t** in 59.3 mg, 98% yield, as pale-yellow solid, m.p. 112 – 115 °C.

**$^1\text{H NMR}$**  (400 MHz,  $\text{CDCl}_3$ ):  $\delta$  = 7.49 – 7.43 (m, 2H), 7.37 – 7.33 (m, 4H), 7.32 – 7.27 (m, 1H), 7.25 – 7.20 (m, 2H), 7.17 – 7.13 (m, 2H), 6.39 (dd,  $J$  = 3.4, 0.7 Hz, 1H), 6.33 (s, 1H), 6.29 (dd,  $J$  = 3.3, 1.9 Hz, 1H);  **$^{13}\text{C NMR}$**  (100 MHz,  $\text{CDCl}_3$ ):  $\delta$  = 172.0, 156.0, 147.3, 143.9, 130.9, 130.2, 129.8, 129.5, 129.0, 128.8, 128.6, 128.2, 127.7, 111.8, 110.8, 76.3; **FTIR** (neat)  $\nu$  1748, 1443, 1287, 1153, 1063, 963, 742, 692  $\text{cm}^{-1}$ ; **HRMS** (ESI) calcd for  $\text{C}_{20}\text{H}_{14}\text{O}_3[\text{M} + \text{Na}]^+$ : 325.0835, found: 325.0839.

### 3,4-diphenyl-5-(thiophen-2-yl) furan-2(5H)-one (**3u**)

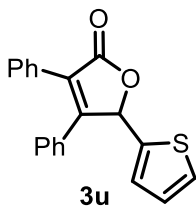

Following the general procedure, the reaction of 2,3-diphenylcycloprop-2-en-1-one **1a** (62.1 mg, 0.3 mmol) and thiophene-2-carbaldehyde **2u** (19  $\mu$ L, 0.2 mmol) with  $\text{PMe}_3$  (1 M in THF, 10  $\mu$ L, 0.01 mmol) was conducted for 2 hours which produced **3u** in 59.7 mg, 94% yield, as pale-yellow solid, m.p. 118 – 121  $^\circ\text{C}$ .

**$^1\text{H NMR}$**  (400 MHz,  $\text{CDCl}_3$ ):  $\delta$  = 7.48 – 7.44 (m, 2H), 7.38 – 7.34 (m, 3H), 7.32 – 7.24 (m, 3H), 7.23 – 7.17 (m, 3H), 7.10 – 7.07 (m, 1H), 6.92 (dd,  $J$  = 5.1, 3.6 Hz, 1H), 6.57 (s, 1H);  **$^{13}\text{C NMR}$**  (100 MHz,  $\text{CDCl}_3$ ):  $\delta$  = 171.8, 158.3, 137.8, 131.0, 130.3, 129.8, 129.5, 129.1, 128.9, 128.7, 128.52, 128.46, 127.5, 127.1(2C), 78.5; **FTIR** (neat)  $\nu$  2981, 1739, 1401, 1283, 1152, 1055, 699  $\text{cm}^{-1}$ ; **HRMS** (ESI) calcd for  $\text{C}_{20}\text{H}_{14}\text{O}_2\text{S}[\text{M} + \text{Na}]^+$ : 341.0607, found: 341.0607.

#### 5-(1-methyl-1H-indol-3-yl)-3,4-diphenylfuran-2(5H)-one (**3v**)

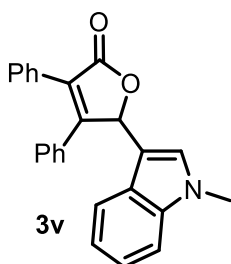

Following the general procedure, the reaction of 2,3-diphenylcycloprop-2-en-1-one **1a** (61.8 mg, 0.3 mmol) and 1-methyl-1H-indole-3-carbaldehyde **2v** (32.0 mg, 0.2 mmol) with  $\text{PMe}_3$  (1 M in THF, 40  $\mu$ L, 0.04 mmol) was conducted for 2 hours which produced **3v** in 72.8 mg, 99% yield, as white solid, m.p. 152 – 155  $^\circ\text{C}$ .

**$^1\text{H NMR}$**  (400 MHz,  $\text{CDCl}_3$ ):  $\delta$  = 7.64 – 7.59 (m, 1H), 7.53 – 7.49 (m, 2H), 7.39 – 7.34 (m, 3H), 7.22 – 7.17 (m, 5H), 7.15 – 7.06 (m, 3H), 6.94 (s, 1H), 6.58 (s, 1H), 3.57 (s, 3H);  **$^{13}\text{C NMR}$**  (100 MHz,  $\text{CDCl}_3$ ):  $\delta$  = 172.6, 158.8, 137.3, 131.6, 130.4, 129.9, 129.7, 129.5, 128.8, 128.7, 128.6, 128.5, 127.4, 126.4, 122.4, 120.2, 119.2, 109.8, 108.1, 78.2, 32.9; **FTIR** (neat)  $\nu$  2981,

1736, 1399, 1243, 1068, 740, 696  $\text{cm}^{-1}$ ; **HRMS** (ESI) calcd for  $\text{C}_{25}\text{H}_{19}\text{NO}_2[\text{M} + \text{Na}]^+$ : 388.1308, found: 388.1313.

#### 3,4-diphenyl-5-propylfuran-2(5H)-one (**3w**)<sup>4</sup>

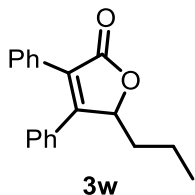

Following the general procedure, the reaction of 2,3-diphenylcycloprop-2-en-1-one **1a** (61.8 mg, 0.3 mmol) and butyraldehyde **2w** (18  $\mu\text{L}$ , 0.2 mmol) with  $\text{PMe}_3$  (1 M in THF, 20  $\mu\text{L}$ , 0.02 mmol) was conducted for 7 hours which produced **3w** in 49.6 mg, 89% yield, as white solid, **<sup>1</sup>H NMR** (400 MHz,  $\text{CDCl}_3$ ):  $\delta$  = 7.41 – 7.29 (m, 8H), 7.25 – 7.21 (m, 2H), 5.46 (dd,  $J$  = 7.4, 2.8 Hz, 1H), 1.88 – 1.74 (m, 1H), 1.56 – 1.43 (m, 3H), 0.90 (t,  $J$  = 7.2 Hz, 3H).

#### 5-butyl-3,4-diphenylfuran-2(5H)-one (**3x**)<sup>5</sup>

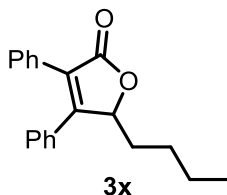

Following the general procedure, the reaction of 2,3-diphenylcycloprop-2-en-1-one **1a** (62.2 mg, 0.3 mmol) and pentanal **2x** (21  $\mu\text{L}$ , 0.2 mmol) with  $\text{PMe}_3$  (1 M in THF, 20  $\mu\text{L}$ , 0.02 mmol) was conducted for 7 hours which produced **3x** in 51.0 mg, 87% yield, as pale-yellow solid. **<sup>1</sup>H NMR** (400 MHz,  $\text{CDCl}_3$ ):  $\delta$  = 7.41 – 7.29 (m, 8H), 7.25 – 7.20 (m, 2H), 5.46 (dd,  $J$  = 7.5, 3.3 Hz, 1H), 1.93 – 1.78 (m, 1H), 1.57 – 1.39 (m, 3H), 1.37 – 1.18 (m, 2H), 0.84 (t,  $J$  = 7.3 Hz, 3H).

#### 3,4-diphenylfuran-2(5H)-one (**3y**)<sup>6</sup>

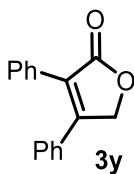

Following the general procedure, the reaction of 2,3-diphenylcycloprop-2-en-1-one **1a** (62.3 mg, 0.3 mmol) and paraformaldehyde **2y** (6.1 mg, 0.2 mmol) with  $\text{PMe}_3$  (1 M in THF, 20  $\mu\text{L}$ , 0.02 mmol) was conducted for 12 hours which produced **3y** in 38.7 mg, 82% yield, as white solid.

$^1\text{H NMR}$  (400 MHz,  $\text{CDCl}_3$ ):  $\delta$  = 7.47 – 7.29 (m, 10H), 5.18 (s, 2H).

### 3,4-bis(4-fluorophenyl)-5-(p-tolyl) furan-2(5H)-one (**3z**)

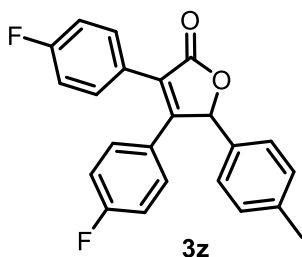

Following the general procedure, the reaction of 2,3-bis(4-fluorophenyl) cycloprop-2-en-1-one **1b** (72.7 mg, 0.3 mmol) and 4-methylbenzaldehyde **2b** (24  $\mu\text{L}$ , 0.2 mmol) with  $\text{PMe}_3$  (1 M in THF, 20  $\mu\text{L}$ , 0.02 mmol) was conducted for 3 hours which produced **3z** in 65.8 mg, 91% yield, as pale-yellow solid, m.p. 105 – 108  $^\circ\text{C}$ .

$^1\text{H NMR}$  (400 MHz,  $\text{CDCl}_3$ ):  $\delta$  = 7.50 – 7.42 (m, 2H), 7.17 – 7.02 (m, 8H), 6.95 – 6.87 (m, 2H), 6.19 (s, 1H), 2.31 (s, 3H);  $^{13}\text{C NMR}$  (100 MHz,  $\text{CDCl}_3$ ):  $\delta$  = 172.4, 163.4 (d,  $J$  = 251.6 Hz), 163.1 (d,  $J$  = 249.5 Hz), 158.2, 139.7, 131.5 (d,  $J$  = 7.8 Hz), 131.4, 130.5 (d,  $J$  = 8.6 Hz), 129.9, 127.7, 127.2 (d,  $J$  = 3.8 Hz), 126.0, 125.8 (d,  $J$  = 3.6 Hz), 116.3 (d,  $J$  = 21.4 Hz), 116.0 (d,  $J$  = 22.1 Hz), 83.7, 21.4;  $^{19}\text{F NMR}$  (376 MHz,  $\text{CDCl}_3$ ):  $\delta$  = -109.1, -111.4; **FTIR** (neat)  $\nu$  2981, 2314, 1749, 1400, 1229, 1069, 868  $\text{cm}^{-1}$ ; **HRMS** (ESI) calcd for  $\text{C}_{23}\text{H}_{16}\text{F}_2\text{O}_2[\text{M} + \text{H}]^+$ : 363.1191, found: 363.1193.

### 3,4,5-tri-*p*-tolylfuran-2(5H)-one (**3aa**)



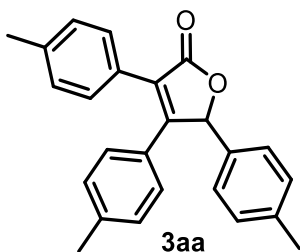

Following the general procedure, the reaction of 2,3-di-*p*-tolylcycloprop-2-en-1-one **1c** (70.3 mg, 0.3 mmol) and 4-methylbenzaldehyde **2b** (24  $\mu$ L, 0.2 mmol) with  $\text{PMe}_3$  (1 M in THF, 20  $\mu$ L, 0.02 mmol) was conducted for 3 hours which produced **3aa** in 65.9 mg, 93% yield, as pale-yellow solid, m.p. 120 – 123  $^\circ\text{C}$ .

**$^1\text{H NMR}$**  (400 MHz,  $\text{CDCl}_3$ ):  $\delta$  = 7.40 – 7.37 (m, 2H), 7.19 – 7.14 (m, 4H), 7.11 (d,  $J$  = 8.0 Hz, 2H), 7.06 – 6.97 (m, 4H), 6.20 (s, 1H), 2.36 (s, 3H), 2.29 (s, 3H), 2.25 (s, 3H);  **$^{13}\text{C NMR}$**  (100 MHz,  $\text{CDCl}_3$ ):  $\delta$  = 173.0, 158.7, 140.2, 139.3, 138.8, 132.2, 129.7, 129.5, 129.4(2C), 128.5, 128.4, 127.8, 127.3, 126.3, 83.6, 21.52, 21.50, 21.4; **FTIR** (neat)  $\nu$  2980, 1746, 1402, 1253, 1153, 1068, 816  $\text{cm}^{-1}$ ; **HRMS** (ESI) calcd for  $\text{C}_{25}\text{H}_{22}\text{O}_2[\text{M} + \text{Na}]^+$ : 377.1512, found: 377.1512.

#### 4-methyl-3-phenyl-5-(*p*-tolyl) furan-2(5H)-one (**3ab**)<sup>7</sup>

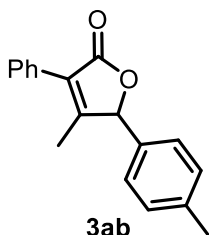

Following the general procedure, the reaction of 2-methyl-3-phenylcycloprop-2-en-1-one **1d** (43.4 mg, 0.3 mmol) and 4-methylbenzaldehyde **2b** (24  $\mu$ L, 0.2 mmol) with  $\text{PMe}_3$  (1 M in THF, 20  $\mu$ L, 0.02 mmol) was conducted for 3 hours which produced **3ab** in 47.0 mg, 89% yield, as pale-yellow solid.

**$^1\text{H NMR}$**  (400 MHz,  $\text{CDCl}_3$ ):  $\delta$  = 7.57 – 7.53 (m, 2H), 7.48 – 7.43 (m, 2H), 7.42 – 7.36 (m, 1H), 7.22 (d,  $J$  = 8.0 Hz, 2H), 7.17 (d,  $J$  = 8.2 Hz, 2H), 5.72 (s, 1H), 2.38 (s, 3H), 2.00 (s, 3H).

#### 3-(4-chlorophenyl)-4-methyl-5-(*p*-tolyl)furan-2(5H)-one (**3ac**)

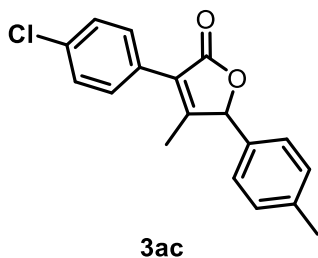

Following the general procedure, the reaction of 2-(4-chlorophenyl)-3-methylcycloprop-2-en-1-one **1e** (53.5 mg, 0.3 mmol) and 4-methylbenzaldehyde **2b** (24  $\mu$ L, 0.2 mmol) with  $\text{PMe}_3$  (1 M in THF, 20  $\mu$ L, 0.02 mmol) was conducted for 6 hours which produced **3ac** in 54.4 mg, 91% yield, as pale-yellow solid, m.p. 126 – 128  $^{\circ}\text{C}$ .

**$^1\text{H NMR}$**  (600 MHz,  $\text{CDCl}_3$ ):  $\delta$  = 7.50 (d,  $J$  = 8.3 Hz, 2H), 7.42 (d,  $J$  = 8.3 Hz, 2H), 7.21 (d,  $J$  = 7.8 Hz, 2H), 7.15 (d,  $J$  = 7.8 Hz, 2H), 5.71 (s, 1H), 2.37 (s, 3H), 1.99 (s, 3H);  **$^{13}\text{C NMR}$**  (150 MHz,  $\text{CDCl}_3$ ):  $\delta$  = 172.6, 161.1, 139.7, 134.7, 131.5, 130.4, 129.9, 128.9, 128.4, 127.1, 125.5, 85.0, 21.4, 13.6; **FTIR** (neat)  $\nu$  2921, 1750, 1490, 1137, 1089, 970  $\text{cm}^{-1}$ ; **HRMS** (ESI) calcd for  $\text{C}_{18}\text{H}_{16}\text{ClO}_2[\text{M} + \text{Na}]^+$ : 321.0653, found: 321.0652.

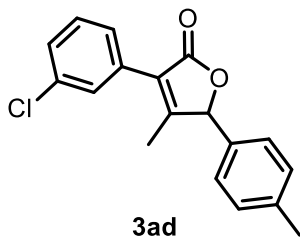

Following the general procedure, the reaction of 2-(3-chlorophenyl)-3-methylcycloprop-2-en-1-one **1f** (53.5 mg, 0.3 mmol) and 4-methylbenzaldehyde **2b** (24  $\mu$ L, 0.2 mmol) with  $\text{PMe}_3$  (1 M in THF, 20  $\mu$ L, 0.02 mmol) was conducted for 4 hours which produced **3ad** in 55.0 mg, 92% yield, as yellow liquid.

**$^1\text{H NMR}$**  (400 MHz,  $\text{CDCl}_3$ ):  $\delta$  = 7.54 (t,  $J$  = 1.8 Hz, 1H), 7.44 (dt,  $J$  = 7.0, 1.9 Hz, 1H), 7.41 – 7.36 (m, 2H), 7.22 (d,  $J$  = 8.1 Hz, 2H), 7.17 – 7.14 (m, 2H), 5.72 (s, 1H), 2.37 (s, 3H), 2.00 (d,  $J$  = 1.0 Hz, 3H);  **$^{13}\text{C NMR}$**  (100 MHz,  $\text{CDCl}_3$ ):  $\delta$  = 172.4, 161.7, 139.7, 134.6, 131.8, 131.5, 129.9(2C), 129.1, 128.8, 127.3, 127.1, 125.4, 85.0, 21.4, 13.5; **FTIR** (neat)  $\nu$  2921, 1751, 1412, 1210, 1139, 989, 731  $\text{cm}^{-1}$ ; **HRMS** (ESI) calcd for  $\text{C}_{18}\text{H}_{16}\text{ClO}_2[\text{M} + \text{H}]^+$ : 299.0842, found: 299.0833.

### 4-ethyl-3-phenyl-5-(*p*-tolyl)furan-2(5*H*)-one (**3ae**)

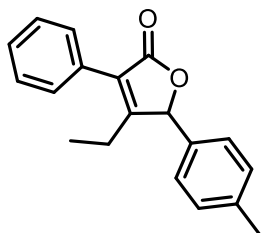

**3ae** and regioisomer (1.5:1)

Following the general procedure, the reaction of 2-ethyl-3-phenylcycloprop-2-en-1-one **1g** (47.5 mg, 0.3 mmol) and 4-methylbenzaldehyde **2b** (24  $\mu$ L, 0.2 mmol) with  $\text{PMe}_3$  (1 M in THF, 20  $\mu$ L, 0.02 mmol) was conducted for 24 hours which produced **3ae** as slightly yellow liquid, in 28.5 mg, 51% yield as a pair of regioisomers (1.5:1).

**$^1\text{H NMR}$**  (600 MHz,  $\text{CDCl}_3$ , major):  $\delta$  = 7.53 – 7.49 (m, 2H), 7.45 (t,  $J$  = 7.6 Hz, 2H), 7.41 – 7.37 (m, 1H), 7.22 (d,  $J$  = 7.8 Hz, 2H), 7.18 (d,  $J$  = 7.8 Hz, 2H), 5.85 (s, 1H), 2.65 (dq,  $J$  = 15.0, 7.5 Hz, 1H), 2.37 (s, 3H), 2.14 (dq,  $J$  = 15.1, 7.6 Hz, 1H), 1.05 (t,  $J$  = 7.6 Hz, 3H);  **$^1\text{H NMR}$**  (600 MHz,  $\text{CDCl}_3$ , selected signals for the minor): 7.08 (s, 4H), 6.11 (s, 1H), 2.60 – 2.49 (m, 2H), 2.28 (s, 3H), 1.26 (t,  $J$  = 7.5 Hz, 3H);  **$^{13}\text{C NMR}$**  (150 MHz,  $\text{CDCl}_3$ , major):  $\delta$  = 173.1, 165.8, 139.6, 131.8, 130.1, 129.9, 129.1, 128.70, 128.67, 127.3, 126.4, 83.5, 21.4, 20.6, 12.6;  **$^{13}\text{C NMR}$**  (150 MHz,  $\text{CDCl}_3$ , minor):  $\delta$  = 174.2, 158.6, 139.2, 132.1, 131.7, 129.9, 129.7, 129.6, 128.9, 128.0, 127.5, 83.7, 21.3, 18.0, 13.1. **FTIR** (neat)  $\nu$  3020, 1747, 1214, 746  $\text{cm}^{-1}$ ; **HRMS** (ESI) calcd for  $\text{C}_{19}\text{H}_{18}\text{O}_2$ [ $\text{M} + \text{H}$ ] $^+$ : 279.1380, found: 279.1387.

### 2-formylphenyl (*E*)-2,3-diphenylacrylate (**4**)<sup>8</sup>

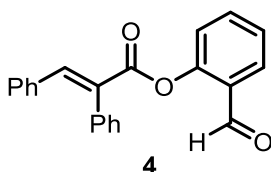

Following the general procedure, the reaction of 2,3-diphenylcycloprop-2-en-1-one **1a** (61.8 mg, 0.3 mmol) and salicylaldehyde **2z** (22  $\mu$ L, 0.2 mmol) with  $\text{PMe}_3$  (1 M in THF, 20  $\mu$ L, 0.02 mmol) was conducted for 12 hours which produced **4** in 45.2 mg, 69% yield, as white solid.

**$^1\text{H NMR}$**  (400 MHz,  $\text{CDCl}_3$ ):  $\delta$  = 10.06 (s, 1H), 8.08 (s, 1H), 7.88 (dd,  $J$  = 7.7, 1.7 Hz, 1H), 7.61 (td,  $J$  = 7.8, 1.8 Hz, 1H), 7.45 – 7.35 (m, 6H), 7.29 (d,  $J$  = 8.3 Hz, 2H), 7.19 (t,  $J$  = 7.6 Hz, 2H), 7.12 (d,  $J$  = 7.1 Hz, 2H).

#### methyl 5-oxo-2,3,4-triphenyl-2,5-dihydrofuran-2-carboxylate (**6a**)

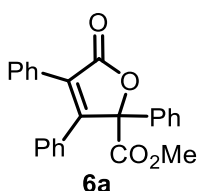

Following the general procedure, the reaction of 2,3-diphenylcycloprop-2-en-1-one **1a** (62.0 mg, 0.3 mmol) and methyl 2-oxo-2-phenylacetate **5a** (29  $\mu$ L, 0.2 mmol) with  $\text{PMe}_3$  (1 M in THF, 20  $\mu$ L, 0.02 mmol) was conducted for 2 hours which produced **6a** in 71.8 mg, 97% yield, as pale-yellow solid, m.p. 135 – 138  $^{\circ}\text{C}$ .

**$^1\text{H NMR}$**  (400 MHz,  $\text{CDCl}_3$ ):  $\delta$  = 7.42 – 7.38 (m, 2H), 7.38 – 7.32 (m, 5H), 7.32 – 7.26 (m, 3H), 7.26 – 7.21 (m, 3H), 6.96 – 6.91 (m, 2H), 3.84 (s, 3H);  **$^{13}\text{C NMR}$**  (100 MHz,  $\text{CDCl}_3$ ):  $\delta$  = 171.2, 167.7, 159.7, 134.0, 131.2, 129.8, 129.5(2C), 129.2(2C), 128.6(3C), 128.5, 128.0, 127.1, 89.6, 53.7; **FTIR** (neat)  $\nu$  1745, 1442, 1260, 1162, 1004, 967, 692  $\text{cm}^{-1}$ ; **HRMS** (ESI) calcd for  $\text{C}_{24}\text{H}_{18}\text{O}_4[\text{M} + \text{Na}]^+$ : 393.1097, found: 393.1096.

#### methyl 3,4-bis(4-fluorophenyl)-5-oxo-2-phenyl-2,5-dihydrofuran-2-carboxylate (**6b**)

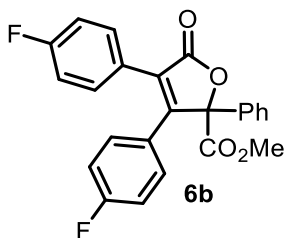

Following the general procedure, the reaction of 2,3-bis(4-fluorophenyl) cycloprop-2-en-1-one **1b** (72.6 mg, 0.3 mmol) and methyl 2-oxo-2-phenylacetate **5a** (29  $\mu$ L, 0.2 mmol) with  $\text{PMe}_3$  (1

M in THF, 20  $\mu$ L, 0.02 mmol) was conducted for 3 hours which produced **6b** in 73.9 mg, 91% yield, as pale-yellow solid, m.p. 145 – 148  $^{\circ}$ C.

**$^1$ H NMR** (400 MHz,  $\text{CDCl}_3$ ):  $\delta$  = 7.45 – 7.31 (m, 7H), 7.04 – 6.90 (m, 6H), 3.84 (s, 3H);  **$^{13}$ C NMR** (100 MHz,  $\text{CDCl}_3$ ):  $\delta$  = 170.9, 167.6, 163.4 (d,  $J$  = 251.7 Hz), 163.1 (d,  $J$  = 250.4 Hz), 158.6, 133.8, 131.5 (d,  $J$  = 8.6 Hz), 131.3 (d,  $J$  = 8.6 Hz), 129.7, 128.8, 127.3, 127.0 (d,  $J$  = 3.9 Hz), 126.9, 125.0 (d,  $J$  = 3.7 Hz), 116.0 (d,  $J$  = 20.4 Hz), 115.8 (d,  $J$  = 21.1 Hz), 89.7, 53.8;  **$^{19}$ F NMR** (376 MHz,  $\text{CDCl}_3$ ):  $\delta$  = -109.8, -110.7; **FTIR** (neat)  $\nu$  1746, 1440, 1258, 1004, 969, 695  $\text{cm}^{-1}$ ; **HRMS** (ESI) calcd for  $\text{C}_{24}\text{H}_{16}\text{F}_2\text{O}_4[\text{M} + \text{Na}]^+$ : 429.0909, found: 429.0904.

#### methyl 3-methyl-5-oxo-2,4-diphenyl-2,5-dihydrofuran-2-carboxylate (**6c**)

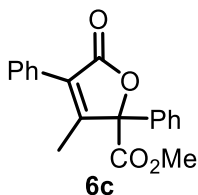

Following the general procedure, the reaction of 2-methyl-3-phenylcycloprop-2-en-1-one **1d** (43.5 mg, 0.3 mmol) and methyl 2-oxo-2-phenylacetate **5a** (29  $\mu$ L, 0.2 mmol) with  $\text{PMe}_3$  (1 M in THF, 20  $\mu$ L, 0.02 mmol) was conducted for 3 hours which produced **6c** in 60.4 mg, 98% yield, as pale-yellow solid, m.p. 105 – 108  $^{\circ}$ C.

**$^1$ H NMR** (400 MHz,  $\text{CDCl}_3$ ):  $\delta$  = 7.54 – 7.50 (m, 2H), 7.47 – 7.36 (m, 8H), 3.88 (s, 3H), 2.25 (s, 3H);  **$^{13}$ C NMR** (100 MHz,  $\text{CDCl}_3$ ):  $\delta$  = 171.2, 167.9, 159.6, 134.6, 129.5, 129.3, 129.2, 129.1, 129.0, 128.6, 127.5, 126.0, 89.7, 53.6, 13.8; **FTIR** (neat)  $\nu$  1761, 1440, 1241, 1178, 1063, 970, 695  $\text{cm}^{-1}$ ; **HRMS** (ESI) calcd for  $\text{C}_{19}\text{H}_{16}\text{O}_4[\text{M} + \text{Na}]^+$ : 331.0941, found: 331.0947.

#### 3,4,5-triphenyl-1-tosyl-1,5-dihydro-2H-pyrrol-2-one (**8a**)<sup>9</sup>

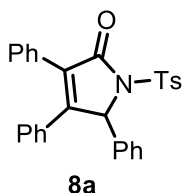

Following the general procedure, the reaction of 2,3-diphenylcycloprop-2-en-1-one **1a** (62.2 mg, 0.3 mmol) and N-benzylidene-4-methylbenzenesulfonamide **7a** (51.8 mg, 0.2 mmol) with  $\text{PMe}_3$  (1 M in THF, 40  $\mu\text{L}$ , 0.04 mmol) was conducted for 20 hours which produced **8a** in 81.9 mg, 88% yield, as pale-yellow solid.

**$^1\text{H NMR}$**  (400 MHz,  $\text{CDCl}_3$ ):  $\delta$  = 7.43 – 7.40 (m, 2H), 7.35 (dd,  $J$  = 6.7, 3.0 Hz, 2H), 7.29 – 7.26 (m, 3H), 7.25 – 7.16 (m, 6H), 7.14 – 7.07 (m, 4H), 7.03 – 6.99 (m, 2H), 6.12 (s, 1H), 2.34 (s, 3H).

**3,4-bis(4-fluorophenyl)-5-phenyl-1-tosyl-1,5-dihydro-2H-pyrrol-2-one (8b)**

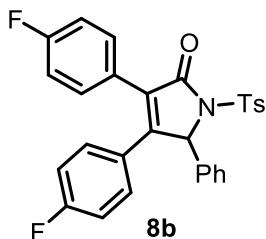

Following the general procedure, the reaction of 2,3-bis(4-fluorophenyl) cycloprop-2-en-1-one **1b** (72.7 mg, 0.3 mmol) and N-benzylidene-4-methylbenzenesulfonamide **7a** (51.9 mg, 0.2 mmol) with  $\text{PMe}_3$  (1 M in THF, 40  $\mu\text{L}$ , 0.04 mmol) was conducted for 24 hours which produced **8b** in 71.3 mg, 71% yield, as pale-yellow solid, m.p. 163 – 165  $^{\circ}\text{C}$ .

**$^1\text{H NMR}$**  (400 MHz,  $\text{CDCl}_3$ ):  $\delta$  = 7.40 (d,  $J$  = 8.4 Hz, 2H), 7.37 – 7.31 (m, 2H), 7.28 – 7.20 (m, 3H), 7.19 – 7.14 (m, 2H), 7.10 (d,  $J$  = 8.2 Hz, 2H), 7.03 – 6.94 (m, 4H), 6.89 – 6.81 (m, 2H), 6.10 (s, 1H), 2.35 (s, 3H);  **$^{13}\text{C NMR}$**  (100 MHz,  $\text{CDCl}_3$ ):  $\delta$  = 167.8, 163.2 (d,  $J$  = 251.5 Hz), 162.9 (d,  $J$  = 249.4 Hz), 154.6, 144.8, 135.7, 134.4, 131.6 (d,  $J$  = 8.2 Hz), 130.7 (d,  $J$  = 8.6 Hz), 130.0, 129.3, 129.0, 128.9, 128.4, 128.1, 127.6 (d,  $J$  = 3.6 Hz), 125.8 (d,  $J$  = 3.5 Hz), 116.1 (d,  $J$  = 21.5 Hz), 115.7 (d,  $J$  = 21.4 Hz), 66.7, 21.7;  **$^{19}\text{F NMR}$**  (376 MHz,  $\text{CDCl}_3$ ):  $\delta$  = -109.5, -111.6; **FTIR** (neat)  $\nu$  1703, 1504, 1352, 1227, 1166, 843, 668, 576  $\text{cm}^{-1}$ ; **HRMS** (ESI) calcd for  $\text{C}_{29}\text{H}_{21}\text{F}_2\text{NO}_3\text{S}[\text{M} + \text{Na}]^+$ : 524.1102, found: 524.1106.

**4-methyl-3,5-diphenyl-1-tosyl-1,5-dihydro-2H-pyrrol-2-one (8c)**

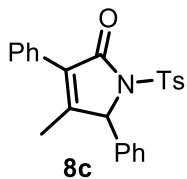

Following the general procedure, the reaction of 2-methyl-3-phenylcycloprop-2-en-1-one **1d** (43.4 mg, 0.3 mmol) and N-benzylidene-4-methylbenzenesulfonamide **7a** (51.8 mg, 0.2 mmol) with PMe<sub>3</sub> (1 M in THF, 40 μL, 0.04 mmol) was conducted for 24 hours which produced **8c** in 69.4 mg, 86% yield, as white solid, m.p. 150 – 153 °C.

<sup>1</sup>H NMR (400 MHz, CDCl<sub>3</sub>): δ = 7.47 – 7.29 (m, 10H), 7.14 (d, *J* = 7.0 Hz, 2H), 7.09 (d, *J* = 8.0 Hz, 2H), 5.59 (s, 1H), 2.34 (s, 3H), 1.89 (s, 3H); <sup>13</sup>C NMR (100 MHz, CDCl<sub>3</sub>): δ = 168.3, 156.2, 144.6, 135.9, 134.9, 130.7, 129.8, 129.3, 129.2, 129.0(2C), 128.6, 128.4, 128.1, 128.0, 68.1, 21.7, 14.0; FTIR (neat) ν 2980, 2374, 1400, 1239, 1069, 870 cm<sup>-1</sup>; HRMS (ESI) calcd for C<sub>24</sub>H<sub>21</sub>NO<sub>3</sub>S[M + Na]<sup>+</sup>: 426.1134, found: 426.1140.

### 3. Synthesis of Compounds 10, 12 and Analytical Data

#### 3.1 Optimization of Reaction Conditions

Cyclopropenone **1a** and ethyl isocyanate **9a** were selected as the model substrate for the optimization of conditions (Table S1). Among various phosphine catalysts screened, only tributyl phosphine and trimethyl phosphine were effective to deliver the product maleimide **10I** in 10% and 36% yield, respectively (entries 1-8). Using PMe<sub>3</sub> as the catalyst, it was found that the addition of 4 Å MS could upgrade the yield to 69% (entry 8). Examination of common solvents indicated that DCM remained the best (entries 9-13). Reducing the catalyst loading to 10 mol % decreased the yield to 49%, while increasing the amount of **1a** to 1.5 equiv could enhance the yield to 83% (entries 14 and 15). The reaction was found to be influenced by temperature, as running the reaction at 0 °C significantly reduced the yield (entry 16).

**Table S1.** Investigation of reaction conditions.<sup>a</sup>

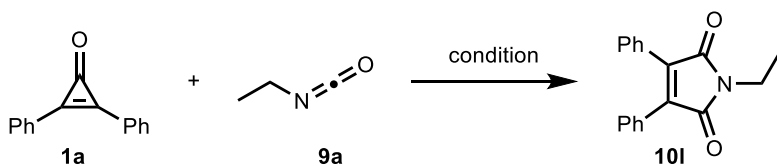

| entry           | catalyst                                                         | additive | solvent            | yield <sup>b</sup> (%) |
|-----------------|------------------------------------------------------------------|----------|--------------------|------------------------|
| 1               | PPh <sub>3</sub>                                                 |          | DCM                | N.D.                   |
| 2               | P(4-FC <sub>6</sub> H <sub>4</sub> ) <sub>3</sub>                |          | DCM                | N.D.                   |
| 3               | P(4-CH <sub>3</sub> C <sub>6</sub> H <sub>4</sub> ) <sub>3</sub> |          | DCM                | N.D.                   |
| 4               | dppb                                                             |          | DCM                | N.D.                   |
| 5               | P <sup>n</sup> Bu <sub>3</sub>                                   |          | DCM                | 10                     |
| 6               | P <sup>t</sup> Bu <sub>3</sub>                                   |          | DCM                | trace                  |
| 7               | PCy <sub>3</sub>                                                 |          | DCM                | trace                  |
| 8               | PMe <sub>3</sub>                                                 |          | DCM                | 36                     |
| 9               | PMe <sub>3</sub>                                                 | 4Å MS    | DCM                | 69                     |
| 10              | PMe <sub>3</sub>                                                 | 4Å MS    | CH <sub>3</sub> CN | 11                     |
| 11              | PMe <sub>3</sub>                                                 | 4Å MS    | toluene            | 68                     |
| 12              | PMe <sub>3</sub>                                                 | 4Å MS    | pentane            | 36                     |
| 13              | PMe <sub>3</sub>                                                 | 4Å MS    | THF                | 49                     |
| 14 <sup>c</sup> | PMe <sub>3</sub>                                                 | 4Å MS    | DCM                | 49                     |
| 15 <sup>d</sup> | PMe <sub>3</sub>                                                 | 4Å MS    | DCM                | 83                     |
| 16 <sup>e</sup> | PMe <sub>3</sub>                                                 | 4Å MS    | DCM                | 15                     |

<sup>a</sup> Reaction condition: Under N<sub>2</sub> atmosphere, the catalyst (20 mol %) was added to a mixture of **1a** (0.2 mmol), **9a** (0.2 mmol) in specified solvent (2.0 mL) in a Schlenk tube, and then the mixture was stirred at room temperature for 24 hours. <sup>b</sup> Isolated yield. <sup>c</sup> 10 mol % catalyst loading. <sup>d</sup> 0.3 mmol **1a** was adopted. <sup>e</sup> The reaction was carried out at 0 °C.

### 3.2 General Procedure for the Synthesis of Compounds **10** and **12**

Under N<sub>2</sub> atmosphere, PMe<sub>3</sub> (1M in THF, 40 μL, 0.04 mmol) was added to a dispersion of cyclopropanone (0.3 mmol), 4 Å MS (100 mg), and isocyanates or carbodiimides (0.2 mmol) in anhydrous DCM (2 mL). The mixture was stirred at room temperature for 24 hours, and then the solvent was removed in *vacuo*. The residue was purified by column chromatography (for maleimides **10** and iminomaleimides **12**, silica gel and alumina were used as the stationary



phase, respectively) with petroleum ether/ethyl acetate (20/1) as eluent to provide the corresponding products **10** and **12**. Compounds **10a–c**, **10f**, **10h–q** are known, and the analytical data are consistent with those reported.<sup>10–13</sup>

### 3.2 Analytical Data for Compounds **10** and **12**

#### 3,4-diphenyl-1-(*p*-tolyl)-1*H*-pyrrole-2,5-dione (**10a**)<sup>10</sup>

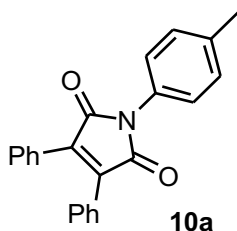

Following the general procedure, the reaction of 2,3-diphenylcycloprop-2-en-1-one **1a** (62.2 mg, 0.3 mmol) and 1-isocyanato-4-methylbenzene **9a** (25  $\mu$ L, 0.2 mmol) with  $\text{PMe}_3$  (1 M in THF, 40  $\mu$ L, 0.04 mmol) was conducted for 24 hours which produced **10a** in 40.7 mg, 60% yield, as yellow solid.

**<sup>1</sup>H NMR** (400 MHz,  $\text{CDCl}_3$ ):  $\delta$  = 7.52 (dd,  $J$  = 7.9, 1.5 Hz, 4H), 7.42 – 7.31 (m, 7H), 7.29 – 7.22 (m, 2H), 7.18 (d,  $J$  = 7.5 Hz, 1H), 2.40 (s, 3H).

#### 3,4-diphenyl-1-(*m*-tolyl)-1*H*-pyrrole-2,5-dione (**10b**)<sup>10</sup>

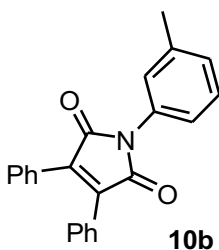

Following the general procedure, the reaction of 2,3-diphenylcycloprop-2-en-1-one **1a** (61.8 mg, 0.3 mmol) and 1-isocyanato-3-methylbenzene **9b** (26  $\mu$ L, 0.2 mmol) with  $\text{PMe}_3$  (1 M in THF, 40  $\mu$ L, 0.04 mmol) was conducted for 24 hours which produced **10b** in 41.5 mg, 61% yield, as yellow solid.

**<sup>1</sup>H NMR** (400 MHz, CDCl<sub>3</sub>): δ = 7.57 – 7.51 (m, 4H), 7.42 – 7.28 (m, 9H), 7.23 (d, *J* = 7.1 Hz, 1H), 2.26 (s, 3H).

**3,4-diphenyl-1-(*o*-tolyl)-1*H*-pyrrole-2,5-dione (10c)<sup>10</sup>**

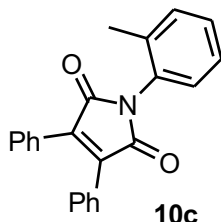

Following the general procedure, the reaction of 2,3-diphenylcycloprop-2-en-1-one **1a** (62.0 mg, 0.3 mmol) and 1-isocyanato-2-methylbenzene **9c** (25 μL, 0.2 mmol) with PMe<sub>3</sub> (1 M in THF, 40 μL, 0.04 mmol) was conducted for 24 hours which produced **10c** in 55.1 mg, 81% yield, as yellow solid.

**<sup>1</sup>H NMR** (400 MHz, CDCl<sub>3</sub>): δ = 7.54 – 7.49 (m, 4H), 7.42 – 7.24 (m, 10H), 2.39 (s, 3H).

**1-(2,3-dimethylphenyl)-3,4-diphenyl-1*H*-pyrrole-2,5-dione (10d)**

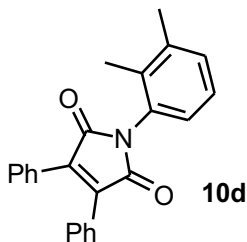

Following the general procedure, the reaction of 2,3-diphenylcycloprop-2-en-1-one **1a** (62.0 mg, 0.3 mmol) and 1-isocyanato-2,3-dimethylbenzene **9d** (28 μL, 0.2 mmol) with PMe<sub>3</sub> (1 M in THF, 40 μL, 0.04 mmol) was conducted for 24 hours which produced **10d** in 62.9 mg, 89% yield, as yellow solid, m.p. 170 – 173 °C.

**<sup>1</sup>H NMR** (400 MHz, CDCl<sub>3</sub>): δ = 7.57 – 7.49 (m, 4H), 7.43 – 7.32 (m, 6H), 7.27 – 7.18 (m, 2H), 7.08 (d, *J* = 7.1 Hz, 1H), 2.35 (s, 3H), 2.13 (s, 3H); **<sup>13</sup>C NMR** (100 MHz, CDCl<sub>3</sub>): δ = 169.9, 138.5, 136.5, 135.3, 130.9, 130.8, 130.2, 130.1, 128.7(2C), 126.43, 126.35, 20.6, 15.0; **FTIR**

(neat)  $\nu$  2919, 1704, 1597, 1514, 1438, 1286, 1024, 699  $\text{cm}^{-1}$ ; **HRMS** (ESI) calcd for  $\text{C}_{24}\text{H}_{19}\text{NO}_2[\text{M} + \text{H}]^+$ : 354.1489, found: 354.1484.

### 1-(3,5-dimethylphenyl)-3,4-diphenyl-1H-pyrrole-2,5-dione (10e)

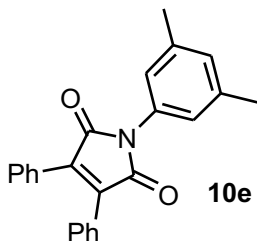

Following the general procedure, the reaction of 2,3-diphenylcycloprop-2-en-1-one **1a** (61.9 mg, 0.3 mmol) and 1-isocyanato-3,5-dimethylbenzene **10e** (28  $\mu\text{L}$ , 0.2 mmol) with  $\text{PMe}_3$  (1 M in THF, 40  $\mu\text{L}$ , 0.04 mmol) was conducted for 24 hours which produced **10e** in 60.1 mg, 85% yield, as yellow solid, m.p. 168 – 171  $^\circ\text{C}$ .

**$^1\text{H NMR}$**  (400 MHz,  $\text{CDCl}_3$ ):  $\delta$  = 7.53 – 7.36 (m, 4H), 7.40 – 7.23 (m, 6H), 6.98 (s, 2H), 6.95 (s, 1H), 2.29 (s, 6H);  **$^{13}\text{C NMR}$**  (100 MHz,  $\text{CDCl}_3$ ):  $\delta$  = 169.9, 139.0, 136.4, 131.6, 130.2, 130.1, 129.9, 128.7(2C), 124.2, 21.5; **FTIR** (neat)  $\nu$  2929, 1703, 1639, 1446, 1373, 1348, 1180, 692  $\text{cm}^{-1}$ ; **HRMS** (ESI) calcd for  $\text{C}_{24}\text{H}_{19}\text{NO}_2[\text{M} + \text{H}]^+$ : 354.1489, found: 354.1478.

### 1-(4-phenoxyphenyl)-3,4-diphenyl-1H-pyrrole-2,5-dione (10f)<sup>11</sup>

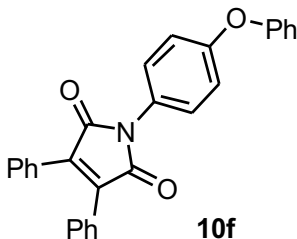

Following the general procedure, the reaction of 2,3-diphenylcycloprop-2-en-1-one **1a** (61.9 mg, 0.3 mmol) and 1-isocyanato-4-phenoxybenzene **9f** (36  $\mu\text{L}$ , 0.2 mmol) with  $\text{PMe}_3$  (1 M in THF, 40  $\mu\text{L}$ , 0.04 mmol) was conducted for 24 hours which produced **10f** in 71.8 mg, 86% yield, as yellow solid.

**<sup>1</sup>H NMR** (400 MHz, CDCl<sub>3</sub>): δ = 7.52 (dd, *J* = 7.8, 1.6 Hz, 4H), 7.44 – 7.32 (m, 10H), 7.17 – 7.04 (m, 5H).

**3,4-diphenyl-1-(4-(trifluoromethoxy) phenyl)-1*H*-pyrrole-2,5-dione (10g)**

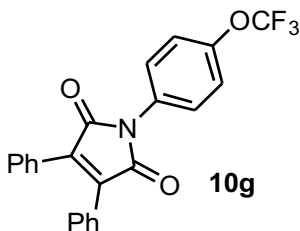

Following the general procedure, the reaction of 2,3-diphenylcycloprop-2-en-1-one **1a** (62.2 mg, 0.3 mmol) and 1-isocyanato-4-(trifluoromethoxy) benzene **9g** (30 μL, 0.2 mmol) with PMe<sub>3</sub> (1 M in THF, 40 μL, 0.04 mmol) was conducted for 24 hours which produced **10g** in 63.8 mg, 78% yield, as yellow solid, m.p. 140 – 143 °C.

**<sup>1</sup>H NMR** (400 MHz, CDCl<sub>3</sub>): δ = 7.56 – 7.50 (m, 6H), 7.48 – 7.31 (m, 8H); **<sup>13</sup>C NMR** (100 MHz, CDCl<sub>3</sub>): δ = 169.4, 148.2, 136.6, 130.5, 130.3, 130.2, 128.8, 128.4, 127.5, 121.7, 120.6 (q, *J* = 257.9 Hz); **<sup>19</sup>F NMR** (376 MHz, CDCl<sub>3</sub>): δ = -57.8; **FTIR** (neat) ν 2920, 1761, 1694, 1374, 1259, 1026, 694 cm<sup>-1</sup>; **HRMS** (ESI) calcd for C<sub>23</sub>H<sub>14</sub>F<sub>3</sub>NO<sub>3</sub>[M + H]<sup>+</sup>: 410.0998, found: 410.0995.

**1-(4-fluorophenyl)-3,4-diphenyl-1*H*-pyrrole-2,5-dione (10h)<sup>10</sup>**

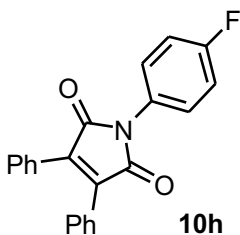

Following the general procedure, the reaction of 2,3-diphenylcycloprop-2-en-1-one **1a** (62.0 mg, 0.3 mmol) and 1-fluoro-4-isocyanatobenzene **9h** (23 μL, 0.2 mmol) with PMe<sub>3</sub> (1 M in THF, 40 μL, 0.04 mmol) was conducted for 24 hours which produced **10h** in 46.7 mg, 68% yield, as yellow solid.

**<sup>1</sup>H NMR** (400 MHz, CDCl<sub>3</sub>): δ = 7.52 (d, *J* = 8.1 Hz, 4H), 7.46 – 7.41 (m, 2H), 7.41 – 7.34 (m, 6H), 7.17 (t, *J* = 8.6 Hz, 2H).

**1-(2-chlorophenyl)-3,4-diphenyl-1*H*-pyrrole-2,5-dione (10i)<sup>10</sup>**

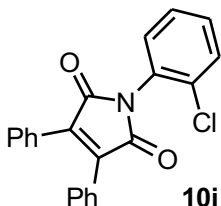

Following the general procedure, the reaction of 2,3-diphenylcycloprop-2-en-1-one **1a** (61.9 mg, 0.3 mmol) and 1-chloro-2-isocyanatobenzene **9i** (25 μL, 0.2 mmol) with PMe<sub>3</sub> (1 M in THF, 40 μL, 0.04 mmol) was conducted for 24 hours which produced **10i** in 58.4 mg, 81% yield, as yellow solid.

**<sup>1</sup>H NMR** (400 MHz, CDCl<sub>3</sub>): δ = 7.61 – 7.51 (m, 5H), 7.45 – 7.34 (m, 9H).

**3,4-diphenyl-1-(4-(trifluoromethyl) phenyl)-1*H*-pyrrole-2,5-dione (10j)<sup>10</sup>**

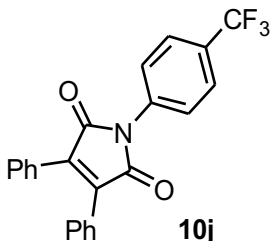

Following the general procedure, the reaction of 2,3-diphenylcycloprop-2-en-1-one **1a** (61.8 mg, 0.3 mmol) and 1-isocyanato-4-(trifluoromethyl) benzene **9j** (29 μL, 0.2 mmol) with PMe<sub>3</sub> (1 M in THF, 40 μL, 0.04 mmol) was conducted for 24 hours which produced **10j** in 48.9 mg, 62% yield, as yellow solid.

**<sup>1</sup>H NMR** (400 MHz, CDCl<sub>3</sub>): δ = 7.76 (d, *J* = 8.4 Hz, 2H), 7.67 (d, *J* = 8.4 Hz, 2H), 7.57 – 7.50 (m, 4H), 7.46 – 7.34 (m, 6H).

**4-(2,5-dioxo-3,4-diphenyl-2,5-dihydro-1*H*-pyrrol-1-yl) benzonitrile (10k)<sup>10</sup>**

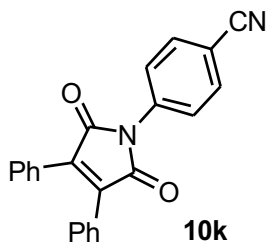

Following the general procedure, the reaction of 2,3-diphenylcycloprop-2-en-1-one **1a** (62.3 mg, 0.3 mmol) and 4-isocyanatobenzonitrile **9k** (28.9 mg, 0.2 mmol) with  $\text{PMe}_3$  (1 M in THF, 40  $\mu\text{L}$ , 0.04 mmol) was conducted for 24 hours which produced **10k** in 30.9 mg, 44% yield, as yellow solid.

**$^1\text{H NMR}$**  (400 MHz,  $\text{CDCl}_3$ ):  $\delta$  = 7.78 (d,  $J$  = 8.8 Hz, 2H), 7.71 (d,  $J$  = 8.8 Hz, 2H), 7.54 – 7.49 (m, 4H), 7.47 – 7.36 (m, 6H).

**1-ethyl-3,4-diphenyl-1H-pyrrole-2,5-dione (10l)<sup>12</sup>**

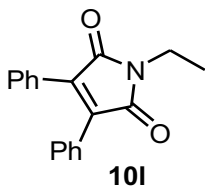

Following the general procedure, the reaction of 2,3-diphenylcycloprop-2-en-1-one **1a** (62.0 mg, 0.3 mmol) and isocyanatoethane **9l** (17  $\mu\text{L}$ , 0.2 mmol) with  $\text{PMe}_3$  (1 M in THF, 40  $\mu\text{L}$ , 0.04 mmol) was conducted for 24 hours which produced **10l** in 45.9 mg, 83% yield, as yellow solid.

**$^1\text{H NMR}$**  (400 MHz,  $\text{CDCl}_3$ ):  $\delta$  = 7.50 – 7.44 (m, 4H), 7.38 – 7.31 (m, 6H), 3.72 (q,  $J$  = 7.2 Hz, 2H), 1.29 (t,  $J$  = 7.2 Hz, 3H).

**1-cyclohexyl-3,4-diphenyl-1H-pyrrole-2,5-dione (10m)<sup>13</sup>**

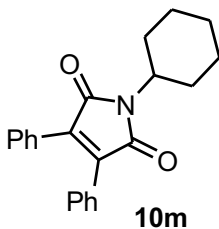

Following the general procedure, the reaction of 2,3-diphenylcycloprop-2-en-1-one **1a** (62.1 mg, 0.3 mmol) and isocyanatocyclohexane **9m** (26  $\mu$ L, 0.2 mmol) with  $\text{PMe}_3$  (1 M in THF, 40  $\mu$ L, 0.04 mmol) was conducted for 24 hours which produced **10m** in 40.5 mg, 61% yield, as yellow solid.

**$^1\text{H NMR}$**  (400 MHz,  $\text{CDCl}_3$ ):  $\delta$  = 7.48 – 7.42 (m, 4H), 7.39 – 7.30 (m, 6H), 4.06 (tt,  $J$  = 12.3, 3.9 Hz, 1H), 2.17 (qd,  $J$  = 12.5, 3.2 Hz, 2H), 1.91 – 1.66 (m, 5H), 1.41 – 1.22 (m, 3H).

#### 1-hexyl-3,4-diphenyl-1H-pyrrole-2,5-dione (**10n**)

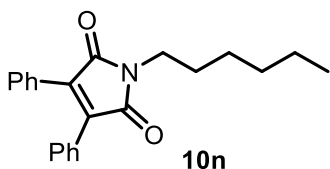

Following the general procedure, the reaction of 2,3-diphenylcycloprop-2-en-1-one **1a** (61.9 mg, 0.3 mmol) and 1-isocyanatohexane **9n** (29  $\mu$ L, 0.2 mmol) with  $\text{PMe}_3$  (1 M in THF, 40  $\mu$ L, 0.04 mmol) was conducted for 24 hours which produced **10n** in 40.2 mg, 60% yield, as yellow solid.

**$^1\text{H NMR}$**  (400 MHz,  $\text{CDCl}_3$ ):  $\delta$  = 7.56 – 7.45 (m, 4H), 7.39 – 7.32 (m, 6H), 3.64 (t,  $J$  = 7.3 Hz, 2H), 1.68 (p,  $J$  = 7.4 Hz, 2H), 1.40 – 1.25 (m, 6H), 0.89 (t,  $J$  = 6.7 Hz, 3H);  **$^{13}\text{C NMR}$**  (100 MHz,  $\text{CDCl}_3$ ):  $\delta$  = 171.0, 136.2, 130.0, 129.9, 128.8, 128.6, 38.6, 31.5, 28.7, 26.6, 22.6, 14.1. **FTIR** (neat)  $\nu$  2987, 1704, 1495, 1396, 1087, 796, 688  $\text{cm}^{-1}$ ; **HRMS** (ESI) calcd for  $\text{C}_{22}\text{H}_{23}\text{NO}_2$ [M + H] $^+$ : 334.1802, found: 334.1810.

#### 1-isopropyl-3,4-diphenyl-1H-pyrrole-2,5-dione (**10o**)<sup>12</sup>

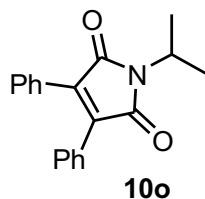

Following the general procedure, the reaction of 2,3-diphenylcycloprop-2-en-1-one **1a** (61.8 mg, 0.3 mmol) and 2-isocyanatopropane **9o** (20  $\mu$ L, 0.2 mmol) with  $\text{PMe}_3$  (1 M in THF, 40  $\mu$ L, 0.04 mmol) was conducted for 24 hours which produced **10o** in 45.5 mg, 78% yield, as yellow solid.

**$^1\text{H NMR}$**  (400 MHz,  $\text{CDCl}_3$ ):  $\delta$  = 7.50 – 7.42 (m, 4H), 7.41 – 7.30 (m, 6H), 4.49 (hept,  $J$  = 6.9 Hz, 1H), 1.49 (d,  $J$  = 6.9 Hz, 6H).

**1-phenethyl-3,4-diphenyl-1H-pyrrole-2,5-dione (10p)<sup>12</sup>**

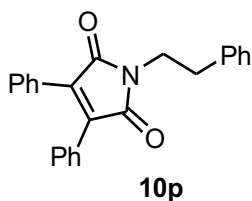

Following the general procedure, the reaction of 2,3-diphenylcycloprop-2-en-1-one **1a** (62.4 mg, 0.3 mmol) and (2-isocyanatoethyl) benzene **9p** (28  $\mu$ L, 0.2 mmol) with  $\text{PMe}_3$  (1 M in THF, 40  $\mu$ L, 0.04 mmol) was conducted for 24 hours which produced **10p** in 53.3 mg, 75% yield, as yellow solid.

**$^1\text{H NMR}$**  (400 MHz,  $\text{CDCl}_3$ ):  $\delta$  = 7.44 (d,  $J$  = 6.5 Hz, 4H), 7.39 – 7.21 (m, 11H), 3.89 (t,  $J$  = 7.7 Hz, 2H), 3.00 (t,  $J$  = 7.7 Hz, 2H).

**1-allyl-3,4-diphenyl-1H-pyrrole-2,5-dione (10q)<sup>11</sup>**

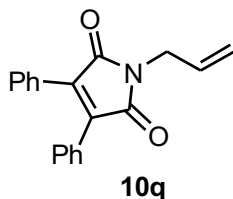



Following the general procedure, the reaction of 2,3-diphenylcycloprop-2-en-1-one **1a** (62.1 mg, 0.3 mmol) and 3-isocyanatoprop-1-ene **9q** (18  $\mu$ L, 0.2 mmol) with  $\text{PMe}_3$  (1 M in THF, 40  $\mu$ L, 0.04 mmol) was conducted for 24 hours which produced **10q** in 39.4 mg, 68% yield, as yellow solid.

**$^1\text{H NMR}$**  (400 MHz,  $\text{CDCl}_3$ ):  $\delta$  = 7.52 – 7.44 (m, 4H), 7.39 – 7.31 (m, 6H), 5.90 (ddt,  $J$  = 16.4, 11.2, 5.8 Hz, 1H), 5.30 (d,  $J$  = 17.1 Hz, 1H), 5.22 (d,  $J$  = 10.2 Hz, 1H), 4.26 (d,  $J$  = 5.8 Hz, 2H).

#### 1-ethyl-3,4-bis(4-fluorophenyl)-1H-pyrrole-2,5-dione (**10r**)

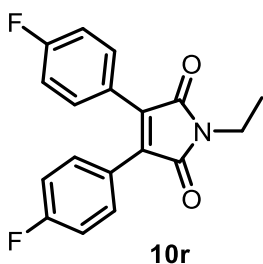

Following the general procedure, the reaction of 2,3-bis(4-fluorophenyl) cycloprop-2-en-1-one **1b** (72.5 mg, 0.3 mmol) and isocyanatoethane **9i** (17  $\mu$ L, 0.2 mmol) with  $\text{PMe}_3$  (1 M in THF, 40  $\mu$ L, 0.04 mmol) was conducted for 24 hours which produced **10r** in 45.1 mg, 72% yield, as yellow solid, m.p. 110 – 113  $^\circ\text{C}$ .

**$^1\text{H NMR}$**  (400 MHz,  $\text{CDCl}_3$ ):  $\delta$  = 7.48 (m, 4H), 7.09 – 6.90 (m, 4H), 3.71 (q,  $J$  = 7.2 Hz, 2H), 1.28 (t,  $J$  = 7.2 Hz, 3H);  **$^{13}\text{C NMR}$**  (100 MHz,  $\text{CDCl}_3$ ):  $\delta$  = 170.6, 163.7 (d,  $J$  = 251.7 Hz), 135.1, 132.1 (d,  $J$  = 8.4 Hz), 124.7 (d,  $J$  = 3.4 Hz), 116.1 (d,  $J$  = 21.9 Hz), 33.5, 14.1;  **$^{19}\text{F NMR}$**  (376 MHz,  $\text{CDCl}_3$ ):  $\delta$  = -109.4; **FTIR** (neat)  $\nu$  2972, 1694, 1597, 1502, 1444, 1405, 1224, 1161, 845  $\text{cm}^{-1}$ ; **HRMS** (ESI) calcd for  $\text{C}_{18}\text{H}_{13}\text{F}_2\text{NO}_2$ [M + H] $^+$ : 314.0987, found: 314.0981.

#### 3,4-bis(4-fluorophenyl)-1-(p-tolyl)-1H-pyrrole-2,5-dione (**10s**)

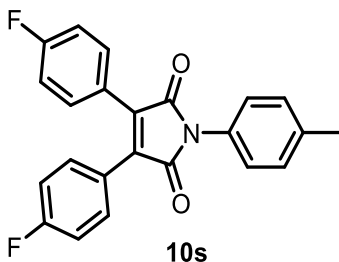

Following the general procedure, the reaction of 2,3-bis(4-fluorophenyl) cycloprop-2-en-1-one **1b** (72.6 mg, 0.3 mmol) and 1-isocyanato-4-methylbenzene **9a** (25  $\mu$ L, 0.2 mmol) with  $\text{PMe}_3$  (1 M in THF, 40  $\mu$ L, 0.04 mmol) was conducted for 24 hours which produced **10s** in 57.0 mg, 76% yield, as yellow solid, m.p. 166 – 168  $^\circ\text{C}$ .

**$^1\text{H NMR}$**  (400 MHz,  $\text{CDCl}_3$ ):  $\delta$  = 7.58 – 7.47 (m, 4H), 7.33 – 7.26 (m, 4H), 7.15 – 7.00 (m, 4H), 2.40 (s, 3H);  **$^{13}\text{C NMR}$**  (100 MHz,  $\text{CDCl}_3$ ):  $\delta$  = 169.6, 163.8 (d,  $J$  = 252.1 Hz), 138.1, 135.1, 132.3 (d,  $J$  = 8.5 Hz), 129.9, 129.1, 126.2, 124.6 (d,  $J$  = 3.5 Hz), 116.2 (d,  $J$  = 21.8 Hz), 21.3;  **$^{19}\text{F NMR}$**  (376 MHz,  $\text{CDCl}_3$ ):  $\delta$  = -109.1; **FTIR** (neat)  $\nu$  2987, 1704, 1598, 1501, 1382, 1221, 1158, 841, 698  $\text{cm}^{-1}$ ; **HRMS** (ESI) calcd for  $\text{C}_{23}\text{H}_{15}\text{F}_2\text{NO}_2$ [M + H] $^+$ : 376.1144, found: 376.1132.

#### 1-ethyl-3,4-di-*p*-tolyl-1*H*-pyrrole-2,5-dione (**10t**)

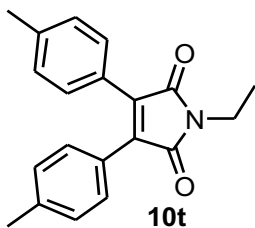

Following the general procedure, the reaction of 2,3-di-*p*-tolylcycloprop-2-en-1-one **1c** (70.2 mg, 0.3 mmol) and isocyanatoethane **9i** (17  $\mu$ L, 0.2 mmol) with  $\text{PMe}_3$  (1 M in THF, 40  $\mu$ L, 0.04 mmol) was conducted for 24 hours which produced **10t** in 48.2 mg, 79% yield, as yellow solid, m.p. 163 – 166  $^\circ\text{C}$ .

**$^1\text{H NMR}$**  (400 MHz,  $\text{CDCl}_3$ ):  $\delta$  = 7.39 (d,  $J$  = 8.2 Hz, 4H), 7.15 (d,  $J$  = 8.0 Hz, 4H), 3.70 (q,  $J$  = 7.2 Hz, 2H), 2.36 (s, 6H), 1.27 (t,  $J$  = 7.2 Hz, 3H);  **$^{13}\text{C NMR}$**  (100 MHz,  $\text{CDCl}_3$ ):  $\delta$  = 171.1, 140.1, 135.6, 129.9, 129.4, 126.1, 33.4, 21.6, 14.2. **FTIR** (neat)  $\nu$  2979, 1698, 1400, 1348, 1049, 872  $\text{cm}^{-1}$ ; **HRMS** (ESI) calcd for  $\text{C}_{20}\text{H}_{19}\text{NO}_2$ [M + H] $^+$ : 306.1489, found: 306.1482.

#### 1,3,4-tri-*p*-tolyl-1*H*-pyrrole-2,5-dione (**10u**)

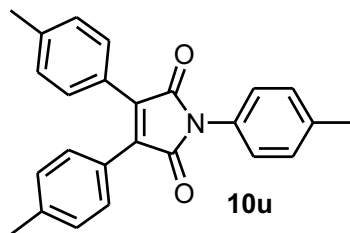

Following the general procedure, the reaction of 2,3-di-*p*-tolylcycloprop-2-en-1-one **1c** (70.4 mg, 0.3 mmol) and 1-isocyanato-4-methylbenzene **9a** (25  $\mu$ L, 0.2 mmol) with  $\text{PMe}_3$  (1 M in THF, 40  $\mu$ L, 0.04 mmol) was conducted for 24 hours which produced **10u** in 59.5 mg, 81% yield, as yellow solid, m.p. 115 – 118  $^\circ\text{C}$ .

**$^1\text{H NMR}$**  (400 MHz,  $\text{CDCl}_3$ ):  $\delta$  = 7.43 (d,  $J$  = 7.9 Hz, 4H), 7.30 (q,  $J$  = 8.2 Hz, 4H), 7.17 (d,  $J$  = 7.9 Hz, 4H), 2.38 (s, 3H), 2.36 (s, 6H);  **$^{13}\text{C NMR}$**  (100 MHz,  $\text{CDCl}_3$ ):  $\delta$  = 170.0, 140.3, 137.7, 135.6, 130.0, 129.8, 129.4, 129.3, 126.2, 125.9, 21.6, 21.3; **FTIR** (neat)  $\nu$  2920, 1706, 1513, 1385, 811, 776  $\text{cm}^{-1}$ ; **HRMS** (ESI) calcd for  $\text{C}_{25}\text{H}_{21}\text{NO}_2$ [ $\text{M} + \text{H}$ ] $^+$ : 368.1645, found: 368.1640.

**1,1'-(2-methyl-1,3-phenylene) bis(3,4-diphenyl-1*H*-pyrrole-2,5-dione) (10v)**

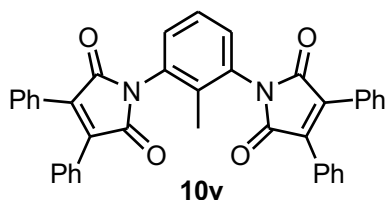

Following the general procedure, the reaction of 2,3-diphenylcycloprop-2-en-1-one **1a** (103.4 mg, 0.5 mmol) and 1,3-diisocyanato-2-methylbenzene **9r** (29  $\mu$ L, 0.2 mmol) with  $\text{PMe}_3$  (1 M in THF, 40  $\mu$ L, 0.04 mmol) was conducted for 24 hours which produced **10v** in 111.4 mg, 95% yield, as yellow solid, m.p. 289 – 292  $^\circ\text{C}$ .

**$^1\text{H NMR}$**  (400 MHz,  $\text{CDCl}_3$ ):  $\delta$  = 7.59 – 7.51 (m, 8H), 7.49 – 7.34 (m, 15H), 2.15 (s, 3H);  **$^{13}\text{C NMR}$**  (100 MHz,  $\text{CDCl}_3$ ):  $\delta$  = 169.3, 136.5, 136.2, 132.3, 130.2(2C), 129.7, 128.8, 128.6, 127.1, 14.5; **FTIR** (neat)  $\nu$  2987, 1710, 1473, 1372, 1352, 1140, 689  $\text{cm}^{-1}$ ; **HRMS** (ESI) calcd for  $\text{C}_{39}\text{H}_{26}\text{N}_2\text{O}_4$ [ $\text{M} + \text{H}$ ] $^+$ : 587.1965, found: 587.1967.

**1,1'-(1,3-phenylenebis(methylene))bis(3,4-diphenyl-1*H*-pyrrole-2,5-dione) (10w)**

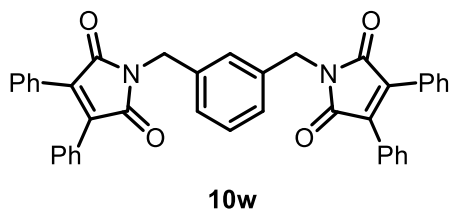

Following the general procedure, the reaction of 2,3-diphenylcycloprop-2-en-1-one **1a** (103.3 mg, 0.5 mmol) and 1,3-bis(isocyanatomethyl)benzene **9s** (31  $\mu$ L, 0.2 mmol) with  $\text{PMe}_3$  (1 M in THF, 40  $\mu$ L, 0.04 mmol) was conducted for 24 hours which produced **10w** in 112.9 mg, 94% yield, as yellow solid, m.p. 193 – 196  $^\circ\text{C}$ .

**$^1\text{H NMR}$**  (400 MHz,  $\text{CDCl}_3$ ):  $\delta$  = 7.56 (s, 1H), 7.48 – 7.43 (m, 8H), 7.38 – 7.28 (m, 15H), 4.81 (s, 4H);  **$^{13}\text{C NMR}$**  (100 MHz,  $\text{CDCl}_3$ ):  $\delta$  = 170.5, 137.1, 136.4, 130.0, 129.9, 129.24, 129.18, 128.7, 128.6, 128.2, 41.9; **FTIR** (neat)  $\nu$  1695, 1429, 1399, 1316, 1082, 949, 691  $\text{cm}^{-1}$ ; **HRMS** (ESI) calcd for  $\text{C}_{40}\text{H}_{28}\text{N}_2\text{O}_4[\text{M} + \text{Na}]^+$ : 623.1941, found: 623.1944.

**(E)-1-cyclohexyl-5-(cyclohexylimino)-3,4-diphenyl-1,5-dihydro-2H-pyrrol-2-one (12a)**

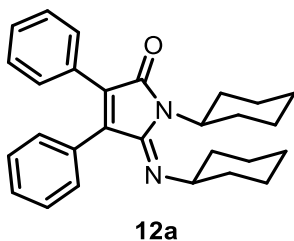

Following the general procedure, the reaction of 2,3-diphenylcycloprop-2-en-1-one **1a** (61.9 mg, 0.3 mmol) and dicyclohexylmethanediimine **11a** (41.3 mg, 0.2 mmol) with  $\text{PMe}_3$  (1 M in THF, 40  $\mu$ L, 0.04 mmol) was conducted for 24 hours which produced **12a** in 71.8 mg, 87% yield, as pale-yellow solid, m.p. 112 – 115  $^\circ\text{C}$ .

**$^1\text{H NMR}$**  (400 MHz,  $\text{CDCl}_3$ ):  $\delta$  = 7.38 – 7.29 (m, 3H), 7.35 – 7.26 (m, 2H), 7.29 – 7.20 (m, 2H), 7.23 – 7.12 (m, 3H), 4.29 (tt,  $J$  = 12.0, 3.7 Hz, 1H), 3.26 (td,  $J$  = 9.5, 4.8 Hz, 1H), 2.35 (qd,  $J$  = 12.5, 3.2 Hz, 2H), 1.83 (d,  $J$  = 13.1 Hz, 2H), 1.73 – 1.64 (m, 3H), 1.57 (dt,  $J$  = 13.1, 3.6 Hz, 2H), 1.47 – 1.18 (m, 8H), 1.11 (dt,  $J$  = 12.0, 3.2 Hz, 1H), 0.81 – 0.66 (m, 2H);  **$^{13}\text{C NMR}$**  (100

MHz, CDCl<sub>3</sub>):  $\delta$  = 169.2, 148.9, 138.1, 134.5, 134.4, 130.0, 129.8, 128.7, 128.6(2C), 128.4, 127.8, 56.5, 51.2, 34.9, 29.7, 26.4, 25.6, 25.5, 24.2; **FTIR** (neat)  $\nu$  2928, 1703, 1639, 1445, 1373, 1260, 1179, 1024, 692 cm<sup>-1</sup>; **HRMS** (ESI) calcd for C<sub>28</sub>H<sub>32</sub>N<sub>2</sub>O [M + H]<sup>+</sup>: 413.2587, found: 413.2582.

**(E)-1-cyclohexyl-5-(cyclohexylimino)-3,4-bis(4-fluorophenyl)-1,5-dihydro-2H-pyrrol-2-one (12b)**

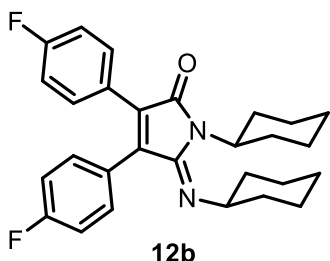

Following the general procedure, the reaction of 2,3-bis(4-fluorophenyl) cycloprop-2-en-1-one **1b** (72.4 mg, 0.3 mmol) and dicyclohexylmethanediimine **11a** (41.2 mg, 0.2 mmol) with PMe<sub>3</sub> (1 M in THF, 40  $\mu$ L, 0.04 mmol) was conducted for 24 hours which produced **12b** in 81.6 mg, 91% yield, as pale-yellow solid, m.p. 108 – 111 °C.

**<sup>1</sup>H NMR** (400 MHz, CDCl<sub>3</sub>):  $\delta$  = 7.32 – 7.21 (m, 4H), 7.14 – 7.05 (m, 2H), 6.95 – 6.84 (m, 2H), 4.27 (tt,  $J$  = 12.3, 3.9 Hz, 1H), 3.28 (tt,  $J$  = 9.1, 4.2 Hz, 1H), 2.33 (qd,  $J$  = 12.5, 3.5 Hz, 2H), 1.91 – 1.77 (m, 2H), 1.75 – 1.57 (m, 3H), 1.46 – 1.12 (m, 11H), 0.80 (qt,  $J$  = 12.0, 3.9 Hz, 2H); **<sup>13</sup>C NMR** (100 MHz, CDCl<sub>3</sub>)  $\delta$  = 168.9, 162.9 (d,  $J$  = 249.8 Hz), 162.8 (d,  $J$  = 249.0 Hz), 148.6, 137.8, 133.3, 132.0 (d,  $J$  = 8.2 Hz), 130.5 (d,  $J$  = 8.1 Hz), 130.2 (d,  $J$  = 3.7 Hz), 125.7 (d,  $J$  = 3.3 Hz), 116.2 (d,  $J$  = 21.6 Hz), 115.2 (d,  $J$  = 21.5 Hz), 56.6, 51.4, 34.9, 29.7, 26.5, 25.6, 25.5, 24.2; **<sup>19</sup>F NMR** (376 MHz, CDCl<sub>3</sub>):  $\delta$  = -111.6, -112.2; **FTIR** (neat)  $\nu$  2929, 1701, 1639, 1501, 1400, 1226, 1158, 837, 671 cm<sup>-1</sup>; **HRMS** (ESI) calcd for C<sub>28</sub>H<sub>30</sub>F<sub>2</sub>N<sub>2</sub>O [M + H]<sup>+</sup>: 449.2399, found: 449.2395.

**(E)-1-cyclohexyl-5-(cyclohexylimino)-3,4-di-*p*-tolyl-1,5-dihydro-2H-pyrrol-2-one (12c)**

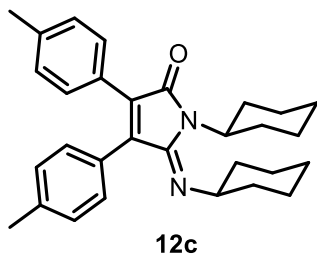

Following the general procedure, the reaction of 2,3-di-*p*-tolylcycloprop-2-en-1-one **1c** (70.4 mg, 0.3 mmol) and dicyclohexylmethanediimine **11a** (41.3 mg, 0.2 mmol) with PMe<sub>3</sub> (1 M in THF, 40 μL, 0.04 mmol) was conducted for 24 hours which produced **12c** in 72.2 mg, 82% yield, as pale-yellow solid, m.p. 126 – 129 °C.

**<sup>1</sup>H NMR** (400 MHz, CDCl<sub>3</sub>): δ = 7.22 (d, *J* = 8.2 Hz, 2H), 7.18 – 7.10 (m, 4H), 6.99 (d, *J* = 8.1 Hz, 2H), 4.27 (tt, *J* = 12.3, 3.8 Hz, 1H), 3.31 (tt, *J* = 9.3, 3.9 Hz, 1H), 2.38 (s, 3H), 2.37 – 2.28 (m, 2H), 2.25 (s, 3H), 1.82 (d, *J* = 13.1 Hz, 2H), 1.74 – 1.64 (m, 3H), 1.58 (dt, *J* = 13.0, 3.6 Hz, 2H), 1.46 – 1.20 (m, 8H), 1.18 – 1.06 (m, 1H), 0.83 – 0.70 (m, 2H); **<sup>13</sup>C NMR** (100 MHz, CDCl<sub>3</sub>): δ = 169.4, 149.2, 138.6, 138.1, 137.9, 134.1, 131.5, 130.0, 129.4, 128.6, 128.5, 127.1, 56.3, 51.1, 34.9, 29.7, 26.5, 25.7, 25.6, 24.2, 21.5, 21.4; **FTIR** (neat) ν<sub>2924</sub>, 1701, 1638, 1448, 1369, 1184, 827 cm<sup>-1</sup>; **HRMS** (ESI) calcd for C<sub>30</sub>H<sub>36</sub>N<sub>2</sub>O [M + H]<sup>+</sup>: 441.2900, found: 441.2903.

**(E)-1-isopropyl-5-(isopropylimino)-3,4-diphenyl-1,5-dihydro-2H-pyrrol-2-one (12d)**

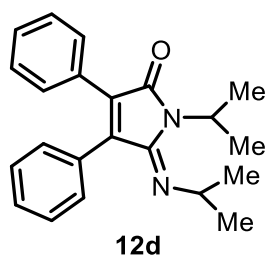

Following the general procedure, the reaction of 2,3-diphenylcycloprop-2-en-1-one **1a** (62.0 mg, 0.3 mmol) and diisopropylmethanediimine **11b** (31 μL, 0.2 mmol) with PMe<sub>3</sub> (1 M in THF, 40 μL, 0.04 mmol) was conducted for 24 hours which produced **12d** in 60.5 mg, 91% yield, as pale-yellow solid, m.p. 103 – 106 °C.

**<sup>1</sup>H NMR** (400 MHz, CDCl<sub>3</sub>): δ = 7.37 – 7.32 (m, 3H), 7.29 – 7.24 (m, 4H), 7.21 – 7.14 (m, 3H), 4.72 (p, *J* = 6.9 Hz, 1H), 3.71 (p, *J* = 6.0 Hz, 1H), 1.49 (d, *J* = 7.0 Hz, 6H), 0.95 (d, *J* = 6.1 Hz,

6H);  $^{13}\text{C NMR}$  (100 MHz,  $\text{CDCl}_3$ ):  $\delta$  = 169.1, 148.7, 138.6, 134.7, 134.3, 130.0, 129.7, 128.8, 128.7(2C), 128.6, 127.9, 48.5, 43.2, 24.9, 20.1; **FTIR** (neat)  $\nu$  2969, 1708, 1639, 1404, 1353, 1260, 1021, 798, 690  $\text{cm}^{-1}$ ; **HRMS** (ESI) calcd for  $\text{C}_{22}\text{H}_{24}\text{N}_2\text{O}$   $[\text{M} + \text{H}]^+$ : 333.1961, found: 333.1957.

**(E)-3,4-bis(4-fluorophenyl)-1-isopropyl-5-(isopropylimino)-1,5-dihydro-2H-pyrrol-2-one (12e)**

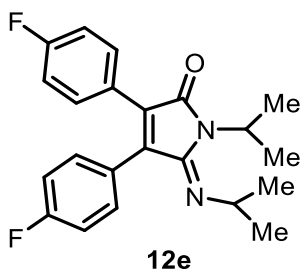

Following the general procedure, the reaction of 2,3-bis(4-fluorophenyl) cycloprop-2-en-1-one **1b** (72.7 mg, 0.3 mmol) and diisopropylmethanediamine **11b** (31  $\mu\text{L}$ , 0.2 mmol) with  $\text{PMe}_3$  (1 M in THF, 40  $\mu\text{L}$ , 0.04 mmol) was conducted for 24 hours which produced **12e** in 65.6 mg, 89% yield, as pale-yellow solid, m.p. 99 – 101  $^\circ\text{C}$ .

$^1\text{H NMR}$  (400 MHz,  $\text{CDCl}_3$ ):  $\delta$  = 7.30 – 7.20 (m, 4H), 7.09 (t,  $J$  = 8.6 Hz, 2H), 6.90 (t,  $J$  = 8.7 Hz, 2H), 4.71 (hept,  $J$  = 6.7 Hz, 1H), 3.71 (hept,  $J$  = 6.1 Hz, 1H), 1.48 (d,  $J$  = 7.0 Hz, 6H), 0.96 (d,  $J$  = 6.1 Hz, 6H);  $^{13}\text{C NMR}$  (100 MHz,  $\text{CDCl}_3$ ):  $\delta$  = 168.8, 162.94 (d,  $J$  = 250.0 Hz), 162.89 (d,  $J$  = 249.0 Hz), 148.4, 138.2, 133.4, 132.0 (d,  $J$  = 8.3 Hz), 130.5 (d,  $J$  = 8.1 Hz), 130.1 (d,  $J$  = 3.7 Hz), 125.6 (d,  $J$  = 3.4 Hz), 116.3 (d,  $J$  = 21.7 Hz), 115.2 (d,  $J$  = 21.6 Hz), 48.5, 43.3, 24.8, 20.1;  $^{19}\text{F NMR}$  (376 MHz,  $\text{CDCl}_3$ ):  $\delta$  = -111.5, -112.0; **FTIR** (neat)  $\nu$  2964, 1701, 1444, 1398, 1260, 1018, 693  $\text{cm}^{-1}$ ; **HRMS** (ESI) calcd for  $\text{C}_{22}\text{H}_{22}\text{F}_2\text{N}_2\text{O}$   $[\text{M} + \text{H}]^+$ : 369.1773, found: 369.1775.

**(E)-1-isopropyl-5-(isopropylimino)-3,4-di-p-tolyl-1,5-dihydro-2H-pyrrol-2-one (12f)**

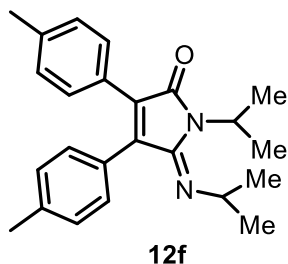

Following the general procedure, the reaction of 2,3-di-*p*-tolylcycloprop-2-en-1-one **1c** (70.3 mg, 0.3 mmol) and diisopropylmethanediimine **11b** (31  $\mu$ L, 0.2 mmol) with  $\text{PMe}_3$  (1 M in THF, 40  $\mu$ L, 0.04 mmol) was conducted for 24 hours which produced **12f** in 63.4 mg, 88% yield, as pale-yellow solid, m.p. 125 – 127  $^{\circ}\text{C}$ .

$^1\text{H NMR}$  (400 MHz,  $\text{CDCl}_3$ ):  $\delta$  = 7.20 – 7.11 (m, 6H), 6.99 (d,  $J$  = 8.2 Hz, 2H), 4.70 (hept,  $J$  = 7.0 Hz, 1H), 3.76 (hept,  $J$  = 6.0 Hz, 1H), 2.37 (s, 3H), 2.25 (s, 3H), 1.48 (d,  $J$  = 7.0 Hz, 6H), 0.94 (d,  $J$  = 6.1 Hz, 6H);  $^{13}\text{C NMR}$  (100 MHz,  $\text{CDCl}_3$ ):  $\delta$  = 169.4, 148.9, 138.6, 138.4, 138.3, 134.2, 131.4, 129.9, 129.6, 128.7, 128.6, 127.0, 48.3, 43.1, 24.9, 21.5, 21.4, 20.1; **FTIR** (neat)  $\nu$  2970, 1700, 1633, 1400, 1352, 1260, 1024, 677  $\text{cm}^{-1}$ ; **HRMS** (ESI) calcd for  $\text{C}_{24}\text{H}_{28}\text{N}_2\text{O}$  [ $\text{M} + \text{H}$ ] $^+$ : 361.2274, found: 361.2272.

#### 4. X-ray Crystallographic Data of **3v**, **10e** and **12a**

Single crystal of compound **3v** was obtained by recrystallization from ethyl acetate, while compounds **10e** and **12a** were both obtained from a mixture solvent of petroleum ether (60–90  $^{\circ}\text{C}$ ) and ethyl acetate. The structures of **3v**, **10e** and **12a** are shown in Figures S1–S3, and X-ray diffraction data and refinement are shown in Tables S2–S4, respectively. CIF files can be obtained from the Cambridge Crystallographic Data Center using deposition number (**3v**, CCDC 2118493; **10e**, CCDC 2118492; **12a**, CCDC 2118486).



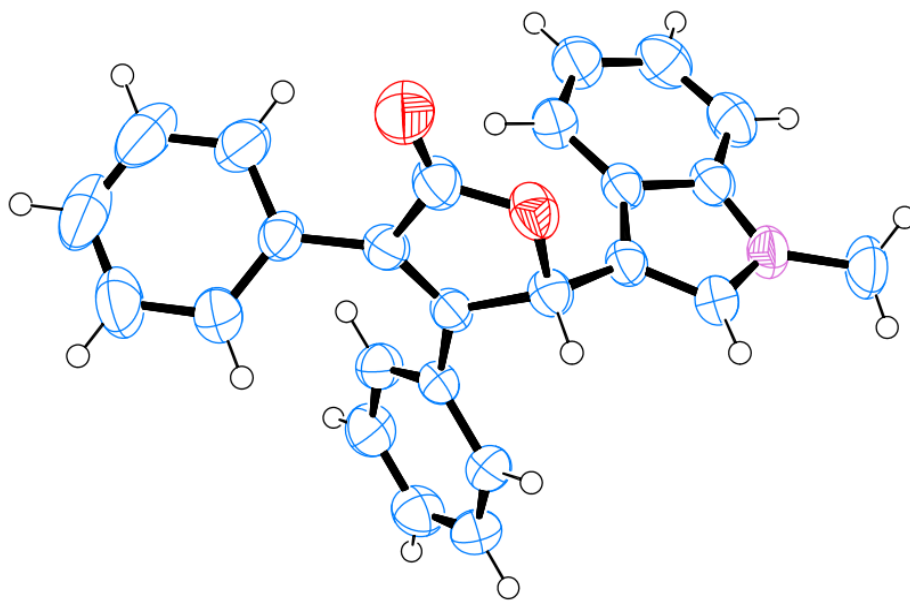

**Figure S1.** X-ray Single Crystal Structure of **3v**

**Table S2.** Crystal data and structure refinement for **3v**

|                       |                                                 |
|-----------------------|-------------------------------------------------|
| Identification code   | <b>3v</b>                                       |
| Empirical formula     | C <sub>20</sub> H <sub>17</sub> NO <sub>2</sub> |
| Formula weight        | 303.13                                          |
| Temperature/K         | 296.15                                          |
| Crystal system        | trigonal                                        |
| Space group           | R-3                                             |
| a/Å                   | 32.848(15)                                      |
| b/Å                   | 32.848(15)                                      |
| c/Å                   | 10.842(9)                                       |
| α/°                   | 90                                              |
| β/°                   | 90                                              |
| γ/°                   | 120                                             |
| Volume/Å <sup>3</sup> | 10130(19)                                       |
| Z                     | 1                                               |

|                                                |                                          |
|------------------------------------------------|------------------------------------------|
| $\rho_{\text{calc}}/\text{cm}^3$               | 1.078                                    |
| $\mu/\text{mm}^{-1}$                           | 0.068                                    |
| F(000)                                         | 3456.0                                   |
| Crystal size/ $\text{mm}^3$                    | 0.24 × 0.22 × 0.2                        |
| Radiation                                      | MoK $\alpha$ ( $\lambda = 0.71073$ )     |
| 2 $\theta$ range for data collection/ $^\circ$ | 4.02 to 50.87                            |
| Index ranges                                   | -39 ≤ h ≤ 39, -39 ≤ k ≤ 35, -13 ≤ l ≤ 12 |
| Reflections collected                          | 22203                                    |
| Independent reflections                        | 4144 [Rint = 0.0948, Rsigma = 0.0548]    |
| Data/restraints/parameters                     | 4144/0/254                               |
| Goodness-of-fit on F <sup>2</sup>              | 1.014                                    |
| Final R indexes [ $ I  \geq 2\sigma(I)$ ]      | R1 = 0.0504, wR2 = 0.1233                |
| Final R indexes [all data]                     | R1 = 0.0767, wR2 = 0.1450                |
| Largest diff. peak/hole / e $\text{\AA}^{-3}$  | 0.14/-0.22                               |

---

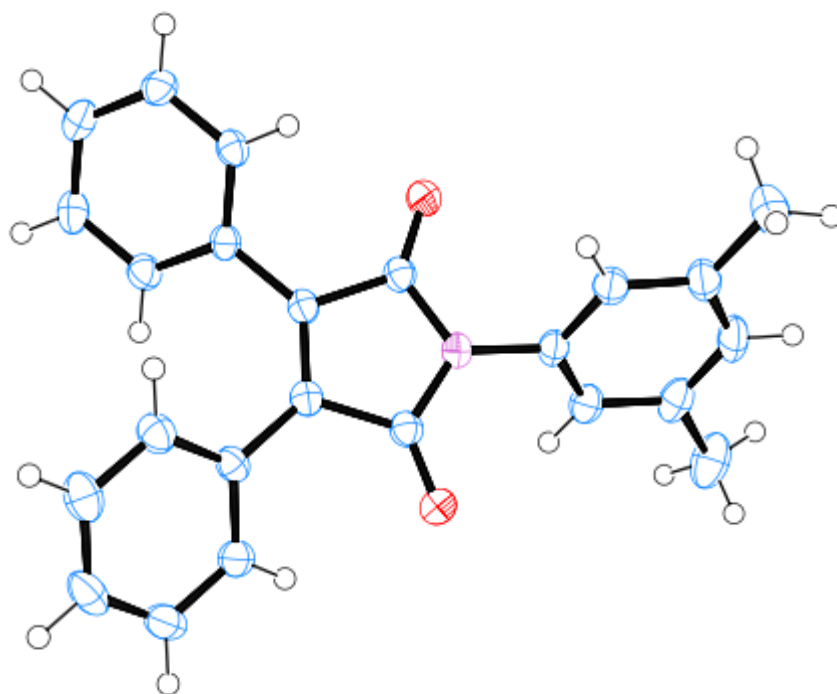

**Figure S2.** X-ray Single Crystal Structure of **10e**

**Table S3.** Crystal data and structure refinement for **10e**

---

|                                    |                                                 |
|------------------------------------|-------------------------------------------------|
| Identification code                | <b>10e</b>                                      |
| Empirical formula                  | C <sub>24</sub> H <sub>19</sub> NO <sub>2</sub> |
| Formula weight                     | 353.14                                          |
| Temperature/K                      | 296.15                                          |
| Crystal system                     | monoclinic                                      |
| Space group                        | P2 <sub>1</sub> /c                              |
| a/Å                                | 9.4143(14)                                      |
| b/Å                                | 14.690(2)                                       |
| c/Å                                | 13.927(2)                                       |
| α/°                                | 90                                              |
| β/°                                | 106.730(2)                                      |
| γ/°                                | 90                                              |
| Volume/Å <sup>3</sup>              | 1844.6(5)                                       |
| Z                                  | 1                                               |
| ρ <sub>calc</sub> /cm <sup>3</sup> | 1.273                                           |
| μ/mm <sup>-1</sup>                 | 0.081                                           |
| F(000)                             | 744.0                                           |
| Crystal size/mm <sup>3</sup>       | 0.26 × 0.24 × 0.2                               |
| Radiation                          | MoKα (λ = 0.71073)                              |
| 2θ range for data collection/°     | 4.124 to 53.074                                 |
| Index ranges                       | -11 ≤ h ≤ 11, -18 ≤ k ≤ 18, -17 ≤ l ≤ 17        |
| Reflections collected              | 18618                                           |
| Independent reflections            | 3822 [Rint = 0.0359, Rsigma = 0.0281]           |
| Data/restraints/parameters         | 3822/0/246                                      |
| Goodness-of-fit on F <sup>2</sup>  | 1.021                                           |

Final R indexes [ $I \geq 2\sigma(I)$ ] R1 = 0.0385, wR2 = 0.0906

Final R indexes [all data] R1 = 0.0568, wR2 = 0.1002

Largest diff. peak/hole /  $e \text{ \AA}^{-3}$  0.22/-0.21

---

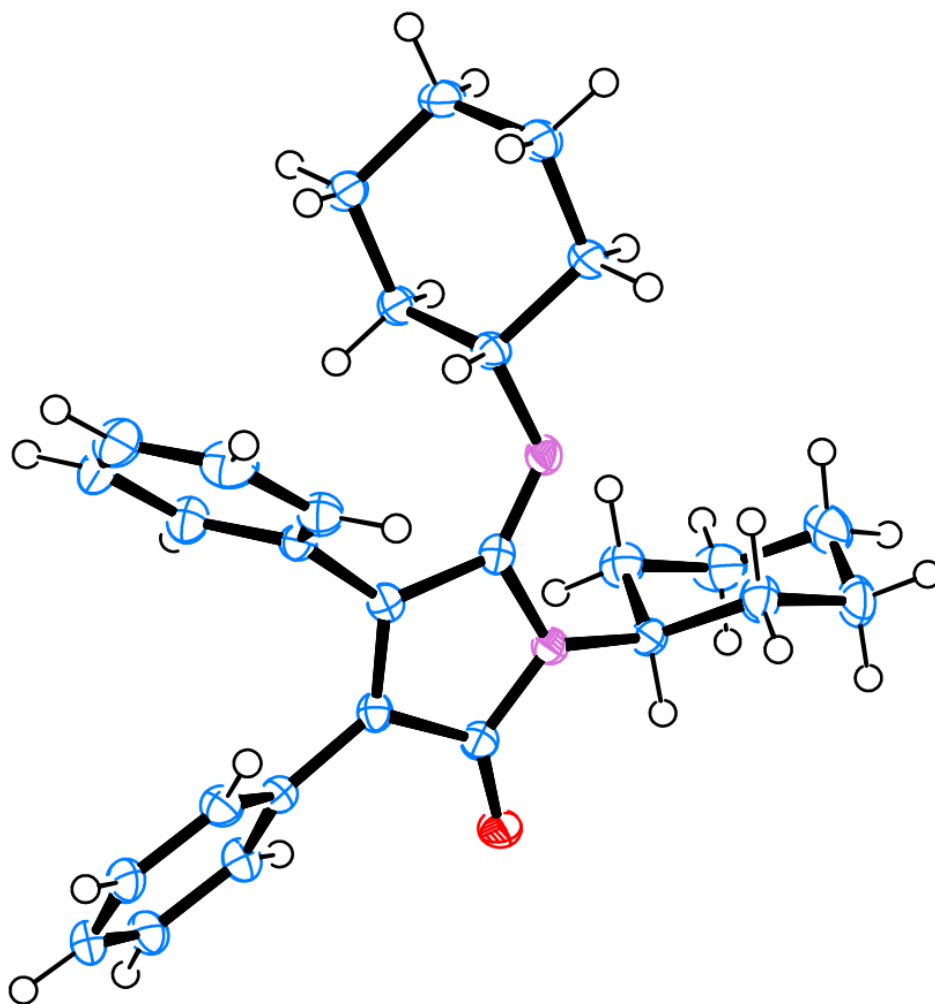

**Figure S3.** X-ray Single Crystal Structure of **12a**

**Table S4.** Crystal data and structure refinement for **12a**

---

|                     |                                                  |
|---------------------|--------------------------------------------------|
| Identification code | <b>12a</b>                                       |
| Empirical formula   | C <sub>28</sub> H <sub>32</sub> N <sub>2</sub> O |

|                                             |                                        |
|---------------------------------------------|----------------------------------------|
| Formula weight                              | 412.25                                 |
| Temperature/K                               | 296.15                                 |
| Crystal system                              | triclinic                              |
| Space group                                 | P-1                                    |
| a/Å                                         | 6.2055(17)                             |
| b/Å                                         | 11.319(3)                              |
| c/Å                                         | 32.886(9)                              |
| $\alpha$ /°                                 | 89.884(3)                              |
| $\beta$ /°                                  | 85.258(4)                              |
| $\gamma$ /°                                 | 89.848(4)                              |
| Volume/Å <sup>3</sup>                       | 2302.0(11)                             |
| Z                                           | 1                                      |
| $\rho_{\text{calc}}$ /cm <sup>3</sup>       | 1.193                                  |
| $\mu$ /mm <sup>-1</sup>                     | 0.072                                  |
| F(000)                                      | 892.0                                  |
| Crystal size/mm <sup>3</sup>                | 0.24 × 0.22 × 0.2                      |
| Radiation                                   | MoK $\alpha$ ( $\lambda$ = 0.71073)    |
| 2 $\theta$ range for data collection/°      | 3.598 to 53.342                        |
| Index ranges                                | -7 ≤ h ≤ 7, -14 ≤ k ≤ 14, -41 ≤ l ≤ 41 |
| Reflections collected                       | 14200                                  |
| Independent reflections                     | 6186 [Rint = 0.0446, Rsigma = 0.0751]  |
| Data/restraints/parameters                  | 6186/0/559                             |
| Goodness-of-fit on F <sup>2</sup>           | 1.066                                  |
| Final R indexes [ $ I  \geq 2\sigma(I)$ ]   | R1 = 0.0728, wR2 = 0.1952              |
| Final R indexes [all data]                  | R1 = 0.0995, wR2 = 0.2062              |
| Largest diff. peak/hole / e Å <sup>-3</sup> | 0.19/-0.29                             |

## 5. HRMS and $^{31}\text{P}$ NMR Tracking Experiments

To clarify the possible mechanism of the  $\text{PMe}_3$ -catalyzed (3+2) annulation,  $^{31}\text{P}$  NMR tracking and HRMS experiments were conducted to trap any possible reaction intermediates.

### HRMS Detection:

Under  $\text{N}_2$  atmosphere,  $\text{PMe}_3$  (1M in THF, 20  $\mu\text{L}$ , 0.02 mmol) was added to a dispersion of cyclopropenone **1a** (0.15 mmol), 4 Å MS (50 mg), and isocyanate **9a** (0.1 mmol) in dried  $\text{CH}_2\text{Cl}_2$  (1.0 mL). The mixture was stirred at room temperature for 30 min, a small amount of the mixture was transferred for the HRMS detection. From the HRMS spectrum, a peak with mass 283.1248 (Calcd. for  $\text{C}_{18}\text{H}_{19}\text{OP}[\text{M} + \text{H}]^+$  283.1247) corresponding to the adduct of  $\text{PMe}_3$  and **1a** was observed, which may support the formation of the  $\alpha$ -ketenyl P-ylide intermediate.

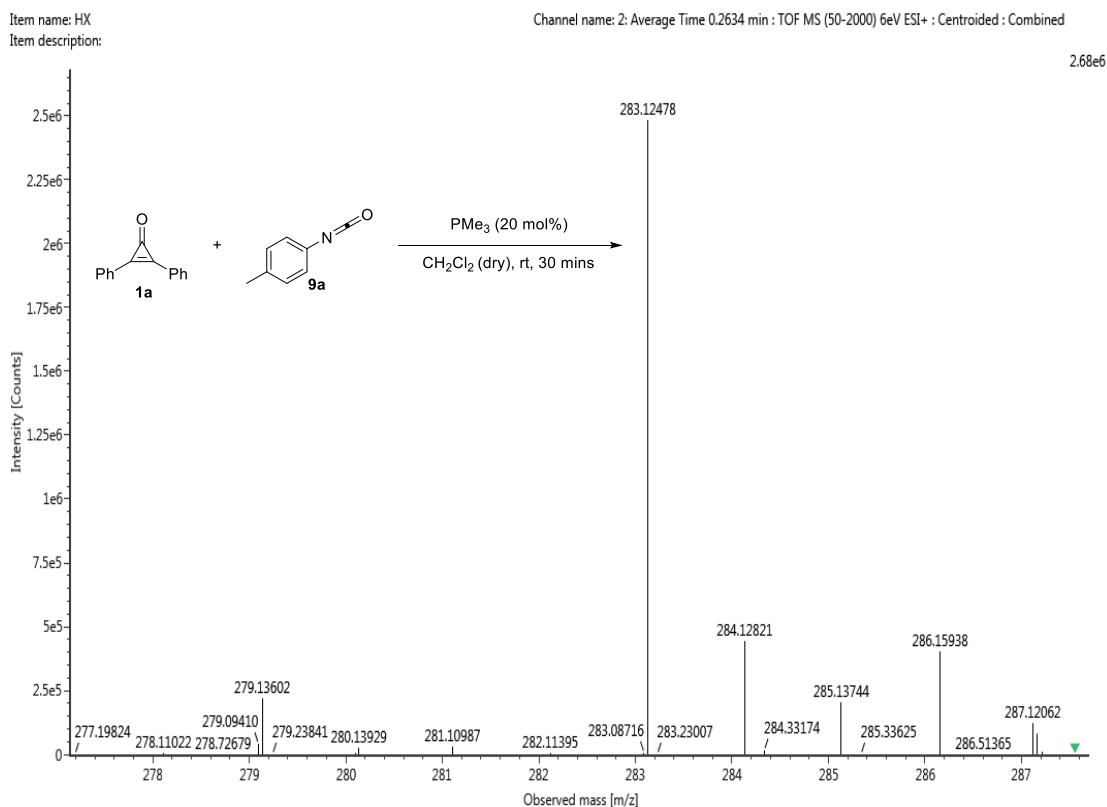

**Figure S4.** HRMS detection of  $\text{PMe}_3$ -catalyzed reaction of **1a** and **9a**

### <sup>31</sup>P NMR Tracking:

Under N<sub>2</sub> atmosphere, PMe<sub>3</sub> (1M in THF, 20 μL, 0.02 mmol) was added to a dispersion of cyclopropenone **1a** (0.15 mmol), 4 Å MS (50 mg), and isocyanate **9a** (0.1 mmol) in dried CDCl<sub>3</sub> (1.0 mL). After 3 hours, the reaction mixture was filtered through syringe filter and the filtrate was subjected to the <sup>31</sup>P NMR test. From the <sup>31</sup>P NMR spectrum, it was found that several new peaks with signals at 5.8, 15.6, 22.9, and 38.6 ppm, respectively, appeared, while the PMe<sub>3</sub> catalyst (signal at -61.8 ppm) disappeared (Figure S5). The result suggests the formation of several PMe<sub>3</sub>-derived intermediates in the reaction, and implies that free phosphine is not the resting state of the catalytic cycle. One of the new signal presumably corresponds to the proposed α-ketenyl P-ylide intermediate as the chemical shift is compatible.

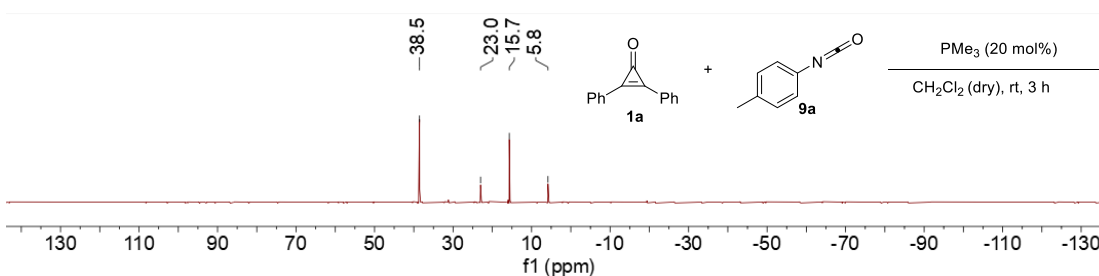

**Figure S5.** <sup>31</sup>P NMR tracking of the PMe<sub>3</sub>-catalyzed reaction of **1a** and **9a**

## 6. Computational Details

All calculations were carried out by using the Gaussian 16 Rev. A.03.<sup>14</sup> Given the benchmark study done by Brinck and co-workers,<sup>15</sup> geometry optimizations and frequency calculations were performed at the ωB97X-D/6-31+G(d) level of theory.<sup>16</sup> Frequency calculations were conducted at the same level of theory to confirm the presence of local minima (no imaginary frequencies) and transition states (one imaginary frequency) on the PES. Subsequently, single point energies were computed at the ωB97X-D/def2TZVP level with SMD<sup>17</sup> solvation model. Conformational searches were conducted using the CREST conformer-rotamer ensemble sampling tool version 2.10.2 with xtb version 6.3.3. to ensure all structures showed are lowest

energy conformers.<sup>18</sup> Intrinsic reaction coordinate (IRC) calculations were performed to verify that the saddle points found were true TSs connecting the reactants and the products.<sup>19</sup> All thermodynamic quantities (1 mol/L, 298.15 K) were computed in the GoodVibes code<sup>20</sup> with quasiharmonic corrections.<sup>21</sup> 3D renderings of stationary points and Frontier Molecular Orbitals(FMOs) were generated using CYLview 1.0<sup>22</sup> and PyMol 2.7.<sup>23</sup>



### Cartesian Coordinates of Calculated Structure

#### 1a

|   |           |           |           |
|---|-----------|-----------|-----------|
| C | -0.717978 | -0.781079 | 1.013243  |
| C | 0.642618  | -0.784657 | 1.023888  |
| C | -1.944221 | -1.312234 | 0.450709  |
| C | -3.159535 | -1.012869 | 1.078564  |
| C | -1.940149 | -2.097263 | -0.708831 |
| C | -4.350605 | -1.508745 | 0.563388  |
| H | -3.154440 | -0.392639 | 1.969735  |
| C | -3.133911 | -2.583687 | -1.225497 |
| H | -1.001676 | -2.303869 | -1.214018 |
| C | -4.338683 | -2.294528 | -0.587016 |
| H | -5.290104 | -1.278882 | 1.056173  |
| H | -3.126993 | -3.187714 | -2.127555 |
| H | -5.270738 | -2.678684 | -0.990492 |
| C | 1.874459  | -1.344527 | 0.502960  |
| C | 3.085027  | -0.708655 | 0.804606  |
| C | 1.880261  | -2.509177 | -0.274458 |
| C | 4.281238  | -1.221105 | 0.318375  |
| H | 3.072200  | 0.186470  | 1.419006  |
| C | 3.079117  | -3.023043 | -0.751192 |
| H | 0.945377  | -3.020344 | -0.482608 |
| C | 4.279161  | -2.376663 | -0.459900 |

|   |           |           |           |
|---|-----------|-----------|-----------|
| H | 5.217071  | -0.722177 | 0.549926  |
| H | 3.079918  | -3.929054 | -1.349316 |
| H | 5.215207  | -2.777956 | -0.836558 |
| C | -0.042254 | 0.108700  | 1.904160  |
| O | -0.046772 | 0.967854  | 2.757621  |

**2a**

|   |          |           |          |
|---|----------|-----------|----------|
| C | 2.590793 | -0.480838 | 2.321275 |
| H | 1.565656 | -0.887993 | 2.459755 |
| C | 3.602161 | -1.476313 | 1.896241 |
| C | 4.928400 | -1.085495 | 1.689632 |
| C | 3.226713 | -2.806363 | 1.702538 |
| C | 5.870193 | -2.023548 | 1.291454 |
| H | 5.195436 | -0.045125 | 1.846933 |
| C | 4.171011 | -3.746256 | 1.303285 |
| H | 2.192818 | -3.103130 | 1.865413 |
| C | 5.491151 | -3.352916 | 1.098520 |
| H | 6.901354 | -1.724660 | 1.129936 |
| H | 3.880596 | -4.781239 | 1.151951 |
| H | 6.230176 | -4.085172 | 0.786752 |
| O | 2.820488 | 0.692108  | 2.513147 |

**3a**

|   |           |           |           |
|---|-----------|-----------|-----------|
| C | -0.017145 | 0.172937  | 0.180737  |
| C | 0.259053  | -1.137878 | 0.074958  |
| C | -0.758114 | 1.063692  | -0.727031 |
| C | -1.973105 | 0.652371  | -1.285977 |
| C | -0.280077 | 2.346988  | -1.010368 |
| C | -2.688130 | 1.505213  | -2.116775 |
| H | -2.353499 | -0.338819 | -1.060724 |
| C | -0.993828 | 3.197015  | -1.848257 |
| H | 0.664269  | 2.678465  | -0.587258 |
| C | -2.199846 | 2.778401  | -2.402030 |
| H | -3.631741 | 1.175838  | -2.540742 |
| H | -0.607139 | 4.187615  | -2.067256 |
| H | -2.759924 | 3.443254  | -3.052544 |
| C | 0.006433  | -2.077095 | -1.031548 |
| C | 0.128901  | -1.660779 | -2.362810 |
| C | -0.350943 | -3.403508 | -0.765567 |
| C | -0.121634 | -2.545024 | -3.404193 |
| H | 0.427629  | -0.640079 | -2.580142 |
| C | -0.603517 | -4.285232 | -1.811126 |
| H | -0.417533 | -3.743691 | 0.261599  |
| C | -0.493367 | -3.859433 | -3.131337 |
| H | -0.020305 | -2.208225 | -4.431544 |
| H | -0.882858 | -5.311163 | -1.590962 |

|   |           |           |           |
|---|-----------|-----------|-----------|
| H | -0.688134 | -4.550944 | -3.945737 |
| C | 0.956402  | -1.554517 | 1.325984  |
| O | 1.361401  | -2.637935 | 1.651008  |
| C | -2.709425 | 2.330454  | 3.864472  |
| C | -1.777129 | 3.171812  | 3.267217  |
| C | -0.727300 | 2.633073  | 2.528046  |
| C | -0.608099 | 1.254561  | 2.376700  |
| C | -1.546185 | 0.413514  | 2.974896  |
| C | -2.589736 | 0.949519  | 3.719206  |
| H | -3.526350 | 2.747744  | 4.445436  |
| H | -1.861254 | 4.248440  | 3.379860  |
| H | 0.002805  | 3.292458  | 2.065407  |
| H | -1.451799 | -0.663066 | 2.866412  |
| H | -3.312364 | 0.288327  | 4.187869  |
| C | 0.494036  | 0.675560  | 1.515854  |
| H | 1.283600  | 1.425125  | 1.376921  |
| O | 1.085488  | -0.462286 | 2.129583  |

**3a\***

|   |           |           |           |
|---|-----------|-----------|-----------|
| C | -0.706781 | -0.605386 | 0.600954  |
| C | -0.425515 | -1.937786 | 0.001695  |
| C | -1.819476 | 0.160924  | -0.027168 |
| C | -3.022093 | -0.472890 | -0.350697 |

|   |           |           |           |
|---|-----------|-----------|-----------|
| C | -1.664588 | 1.515120  | -0.341854 |
| C | -4.058383 | 0.236981  | -0.947727 |
| H | -3.141445 | -1.530346 | -0.132264 |
| C | -2.697411 | 2.223463  | -0.943201 |
| H | -0.727097 | 2.010655  | -0.108011 |
| C | -3.899650 | 1.587578  | -1.244281 |
| H | -4.989451 | -0.268152 | -1.186911 |
| H | -2.561582 | 3.274116  | -1.181883 |
| H | -4.706216 | 2.140970  | -1.715989 |
| C | -0.338005 | -2.179709 | -1.458904 |
| C | 0.087216  | -1.150977 | -2.305948 |
| C | -0.671915 | -3.417969 | -2.018581 |
| C | 0.171660  | -1.356899 | -3.677809 |
| H | 0.350590  | -0.185586 | -1.884990 |
| C | -0.566317 | -3.627229 | -3.388729 |
| H | -1.027491 | -4.221957 | -1.378266 |
| C | -0.149001 | -2.596029 | -4.225534 |
| H | 0.497125  | -0.544737 | -4.321154 |
| H | -0.826014 | -4.596362 | -3.804432 |
| H | -0.078004 | -2.755822 | -5.297064 |
| C | -0.255326 | -2.943806 | 0.849921  |
| O | -0.128279 | -3.833117 | 1.593262  |
| C | -0.565450 | 3.228025  | 4.184490  |

|   |           |           |          |
|---|-----------|-----------|----------|
| C | -1.670218 | 2.526979  | 3.705739 |
| C | -1.497830 | 1.423502  | 2.879722 |
| C | -0.213654 | 1.002157  | 2.509517 |
| C | 0.888382  | 1.701716  | 3.016607 |
| C | 0.716289  | 2.809041  | 3.839915 |
| H | -0.703421 | 4.089831  | 4.830656 |
| H | -2.673400 | 2.837346  | 3.982818 |
| H | -2.364249 | 0.877666  | 2.520932 |
| H | 1.891446  | 1.374777  | 2.753435 |
| H | 1.584588  | 3.342322  | 4.215691 |
| C | 0.022437  | -0.174331 | 1.651913 |
| H | 0.898490  | -0.764266 | 1.919140 |

**IM1**

|   |           |           |           |
|---|-----------|-----------|-----------|
| C | 0.799525  | 0.765579  | 0.539914  |
| C | 1.230785  | -0.326423 | -0.376106 |
| C | 1.594819  | 0.816188  | 1.600541  |
| O | 2.340239  | 0.826935  | 2.503273  |
| C | -0.360061 | 1.655975  | 0.343511  |
| C | -0.611380 | 2.754819  | 1.177695  |
| C | -1.234173 | 1.416495  | -0.723117 |
| C | -1.702765 | 3.583152  | 0.951185  |
| H | 0.057029  | 2.964658  | 2.010436  |

|   |           |           |           |
|---|-----------|-----------|-----------|
| C | -2.324951 | 2.250020  | -0.948715 |
| H | -1.055568 | 0.554224  | -1.359813 |
| C | -2.565944 | 3.338330  | -0.115542 |
| H | -1.878112 | 4.429213  | 1.609777  |
| H | -2.995126 | 2.041101  | -1.778062 |
| H | -3.417569 | 3.988273  | -0.292031 |
| C | 0.638085  | -1.661820 | -0.298893 |
| C | -0.499812 | -1.889623 | 0.502414  |
| C | 1.139174  | -2.774877 | -1.004230 |
| C | -1.101873 | -3.137739 | 0.572550  |
| H | -0.914454 | -1.064427 | 1.073068  |
| C | 0.525925  | -4.021108 | -0.941534 |
| H | 2.044696  | -2.683618 | -1.599688 |
| C | -0.603051 | -4.217601 | -0.153801 |
| H | -1.978924 | -3.266313 | 1.201634  |
| H | 0.949224  | -4.849671 | -1.503766 |
| H | -1.078174 | -5.192047 | -0.098176 |
| P | 2.290275  | 0.130375  | -1.646004 |
| C | 3.998272  | -0.544018 | -1.633796 |
| H | 3.981989  | -1.635260 | -1.687960 |
| H | 4.583445  | -0.153918 | -2.473193 |
| H | 4.475206  | -0.257370 | -0.692160 |
| C | 1.673870  | -0.260177 | -3.324725 |

|   |          |           |           |
|---|----------|-----------|-----------|
| H | 0.803878 | 0.371889  | -3.523067 |
| H | 2.439475 | -0.081442 | -4.085728 |
| H | 1.355368 | -1.304286 | -3.368638 |
| C | 2.536921 | 1.929369  | -1.634342 |
| H | 1.567232 | 2.431182  | -1.679493 |
| H | 3.044456 | 2.233648  | -0.716563 |
| H | 3.144103 | 2.218291  | -2.497010 |

### **TS1**

|   |           |           |           |
|---|-----------|-----------|-----------|
| C | -0.776945 | -0.424249 | 0.397820  |
| C | 0.626516  | -0.318750 | 0.494847  |
| C | -1.881023 | -1.345783 | 0.524326  |
| C | -3.195572 | -0.915393 | 0.293510  |
| C | -1.657472 | -2.676242 | 0.902912  |
| C | -4.257215 | -1.799058 | 0.435836  |
| H | -3.369329 | 0.116148  | 0.001543  |
| C | -2.723925 | -3.555293 | 1.048994  |
| H | -0.639464 | -3.015711 | 1.071799  |
| C | -4.026615 | -3.120578 | 0.815959  |
| H | -5.271267 | -1.456089 | 0.251938  |
| H | -2.538395 | -4.584859 | 1.341598  |
| H | -4.859201 | -3.808659 | 0.928124  |
| C | 1.796173  | -1.019623 | -0.084642 |



|   |           |           |           |
|---|-----------|-----------|-----------|
| C | 2.242831  | -2.254959 | 0.391463  |
| C | 2.469794  | -0.414032 | -1.148588 |
| C | 3.337042  | -2.881484 | -0.193860 |
| H | 1.733891  | -2.717072 | 1.233999  |
| C | 3.563296  | -1.043820 | -1.736458 |
| H | 2.125107  | 0.551067  | -1.508673 |
| C | 3.998817  | -2.277456 | -1.261486 |
| H | 3.674193  | -3.843253 | 0.181644  |
| H | 4.078644  | -0.565963 | -2.564370 |
| H | 4.853752  | -2.766815 | -1.718426 |
| C | -0.243601 | 0.812813  | 0.118686  |
| O | -0.277332 | 2.005078  | -0.159344 |
| P | 1.395050  | 0.297922  | 2.543204  |
| C | 2.448199  | 1.713490  | 2.055128  |
| H | 2.725394  | 2.340850  | 2.908512  |
| H | 3.355614  | 1.339207  | 1.571239  |
| H | 1.889067  | 2.306882  | 1.323760  |
| C | -0.061993 | 1.077822  | 3.329214  |
| H | -0.514517 | 1.772638  | 2.615833  |
| H | -0.802198 | 0.311235  | 3.577588  |
| H | 0.213216  | 1.625047  | 4.236080  |
| C | 2.312056  | -0.480948 | 3.939479  |
| H | 3.222250  | -0.949026 | 3.552887  |

|   |          |           |          |
|---|----------|-----------|----------|
| H | 1.693907 | -1.258587 | 4.397528 |
| H | 2.586822 | 0.253263  | 4.705389 |

**TS2**

|   |           |           |           |
|---|-----------|-----------|-----------|
| C | -1.921746 | 0.139395  | -0.532475 |
| C | -2.306551 | -1.284400 | -0.323128 |
| C | -2.929291 | 1.078580  | -1.059064 |
| C | -4.296775 | 0.790492  | -0.887408 |
| C | -2.617433 | 2.301444  | -1.679966 |
| C | -5.282227 | 1.683262  | -1.277552 |
| H | -4.574520 | -0.149537 | -0.422925 |
| C | -3.608209 | 3.195394  | -2.076216 |
| H | -1.584230 | 2.582417  | -1.866060 |
| C | -4.950246 | 2.899105  | -1.872745 |
| H | -6.324312 | 1.425896  | -1.110480 |
| H | -3.320950 | 4.130355  | -2.550183 |
| H | -5.723638 | 3.596520  | -2.179271 |
| C | -2.569741 | -2.207213 | -1.472226 |
| C | -2.876453 | -1.685065 | -2.740602 |
| C | -2.477799 | -3.606102 | -1.360755 |
| C | -3.075876 | -2.517486 | -3.837480 |
| H | -2.978150 | -0.613603 | -2.868923 |
| C | -2.685037 | -4.433719 | -2.457403 |

|   |           |           |           |
|---|-----------|-----------|-----------|
| H | -2.237911 | -4.060053 | -0.404565 |
| C | -2.982723 | -3.898799 | -3.707440 |
| H | -3.317125 | -2.074617 | -4.800113 |
| H | -2.603341 | -5.509736 | -2.330745 |
| H | -3.141558 | -4.547790 | -4.563218 |
| C | -2.372329 | -1.916925 | 0.871017  |
| O | -2.594659 | -2.793752 | 1.613889  |
| P | -0.261527 | 0.237967  | -1.123329 |
| C | -0.015968 | 0.209197  | -2.936921 |
| H | 1.044539  | 0.307629  | -3.189104 |
| H | -0.402352 | -0.737481 | -3.323190 |
| H | -0.578363 | 1.024174  | -3.400397 |
| C | 0.678211  | 1.705299  | -0.555975 |
| H | 0.061421  | 2.605408  | -0.561073 |
| H | 1.027748  | 1.531621  | 0.464882  |
| H | 1.546728  | 1.861533  | -1.202441 |
| C | 0.668533  | -1.166617 | -0.461307 |
| H | 0.317384  | -2.094692 | -0.918037 |
| H | 0.485052  | -1.208154 | 0.617235  |
| H | 1.734929  | -1.032984 | -0.665670 |
| C | -5.502597 | 2.385798  | 2.378791  |
| C | -4.466031 | 3.156623  | 1.858358  |
| C | -3.215949 | 2.585803  | 1.658290  |

|   |           |           |          |
|---|-----------|-----------|----------|
| C | -2.994747 | 1.242023  | 1.963572 |
| C | -4.032544 | 0.476906  | 2.499526 |
| C | -5.282614 | 1.048619  | 2.704144 |
| H | -6.482452 | 2.828178  | 2.533814 |
| H | -4.635490 | 4.196885  | 1.598434 |
| H | -2.408536 | 3.179297  | 1.236585 |
| H | -3.845992 | -0.560822 | 2.757412 |
| H | -6.088571 | 0.450764  | 3.119497 |
| C | -1.661889 | 0.639185  | 1.716080 |
| H | -0.881015 | 1.391263  | 1.513226 |
| O | -1.339880 | -0.495947 | 2.124320 |

**TS2\***

|   |           |           |           |
|---|-----------|-----------|-----------|
| C | -4.824963 | 1.287038  | 0.879713  |
| C | -5.188872 | -0.181672 | 0.795785  |
| C | -5.908987 | 2.236281  | 0.487678  |
| C | -7.249992 | 1.839460  | 0.628817  |
| C | -5.672038 | 3.575227  | 0.152531  |
| C | -8.293919 | 2.727456  | 0.420434  |
| H | -7.475807 | 0.824073  | 0.934823  |
| C | -6.721574 | 4.463777  | -0.067647 |
| H | -4.664033 | 3.961324  | 0.124159  |
| C | -8.039932 | 4.048107  | 0.057972  |

|   |           |           |           |
|---|-----------|-----------|-----------|
| H | -9.315732 | 2.383521  | 0.551085  |
| H | -6.495851 | 5.495691  | -0.322292 |
| H | -8.857614 | 4.742803  | -0.108176 |
| C | -5.810303 | -0.902172 | -0.357551 |
| C | -6.177927 | -0.223811 | -1.526172 |
| C | -6.029141 | -2.288050 | -0.310627 |
| C | -6.736281 | -0.905377 | -2.602764 |
| H | -6.044995 | 0.849303  | -1.591429 |
| C | -6.587203 | -2.965254 | -1.386578 |
| H | -5.761592 | -2.854833 | 0.578270  |
| C | -6.944793 | -2.278396 | -2.543633 |
| H | -7.015492 | -0.348870 | -3.492723 |
| H | -6.742617 | -4.037880 | -1.317281 |
| H | -7.382724 | -2.806899 | -3.384568 |
| C | -4.889157 | -0.927512 | 1.853936  |
| O | -4.618888 | -1.625848 | 2.748871  |
| P | -3.161447 | 1.441384  | 0.146525  |
| C | -3.017235 | 0.534919  | -1.432898 |
| H | -1.979683 | 0.594263  | -1.777215 |
| H | -3.296073 | -0.513032 | -1.308752 |
| H | -3.668425 | 0.978850  | -2.188976 |
| C | -2.464788 | 3.069883  | -0.269837 |
| H | -2.982410 | 3.504961  | -1.127219 |

|   |           |           |           |
|---|-----------|-----------|-----------|
| H | -2.543510 | 3.706215  | 0.611715  |
| H | -1.413097 | 2.916680  | -0.534141 |
| C | -1.930755 | 0.644277  | 1.220688  |
| H | -2.246377 | -0.362816 | 1.500951  |
| H | -1.817397 | 1.274641  | 2.105038  |
| H | -0.985408 | 0.578194  | 0.674427  |
| C | -8.119416 | 2.851662  | 4.435750  |
| C | -7.672310 | 1.533513  | 4.429966  |
| C | -6.429426 | 1.222815  | 3.884869  |
| C | -5.627863 | 2.223064  | 3.335696  |
| C | -6.066663 | 3.546032  | 3.378682  |
| C | -7.308342 | 3.859091  | 3.916472  |
| H | -9.091700 | 3.095128  | 4.855131  |
| H | -8.289425 | 0.746253  | 4.854193  |
| H | -6.081779 | 0.192955  | 3.902000  |
| H | -5.412730 | 4.310518  | 2.973932  |
| H | -7.647583 | 4.891092  | 3.930262  |
| C | -4.308321 | 1.917602  | 2.671235  |
| H | -3.918203 | 0.934929  | 3.030098  |
| O | -3.474361 | 2.859846  | 2.477840  |

## 7. References

- (1) (a) Li, X.; Han, C.; Yao, H.; Lin, A., Organocatalyzed [3 + 2] Annulation of Cyclopropenones and beta-Ketoesters: An Approach to Substituted Butenolides with a Quaternary Center. *Org. Lett.* **2017**, *19*, 778–781; (b) Row, R. D.; Shih, H.-W.; Alexander, A. T.; Mehl, R. A.; Prescher, J. A., Cyclopropenones for Metabolic Targeting and Sequential Bioorthogonal Labeling. *J. Am. Chem. Soc.* **2017**, *139*, 7370–7375.
- (2) Artok, L.; Kuş, M.; Aksın-Artok, Ö.; Dege, F. N.; Özkılınc, F. Y., Rhodium Catalyzed Reaction of Internal Alkynes With Organoborons Under CO Atmosphere: A Product Tunable Reaction. *Tetrahedron* **2009**, *65*, 9125–9133.
- (3) Morimoto, T.; Wang, C.; Tanimoto, H.; Artok, L.; Kakiuchi, K., Rhodium(I)-Catalyzed CO-Gas-Free Arylative Dual-Carbonylation of Alkynes with Arylboronic Acids via the Formyl C–H Activation of Formaldehyde. *Synthesis* **2021**, *53*, 3372–3382.
- (4) Pangbu, H.; Takaya, M.; Hiroshi, Y., Rhodium Carbonyl-Catalyzed Carbonylation of Acetylenes in the Presence of Olefins and Proton Donors. Synthesis of 5-Alkyl-2(5H)-Furanones. *Chem. Lett.* **1981**, *10*, 989–992.
- (5) Gao, S.; Hu, X., Nickel-Catalyzed Ring-Opening of Alpha-Hydroxycyclobutenones With a Remarkable Ligand Effect. *Chem. Commun.* **2017**, *53*, 10540–10543.
- (6) Fuji, K.; Morimoto, T.; Tsutsumi, K.; Kakiuchi, K., Rh(I)-Catalyzed CO Gas-Free Cyclohydrocarbonylation of Alkynes With Formaldehyde to Alpha,Beta-Butenolides. *Chem. Commun.* **2005**, 3295–3297.
- (7) Zhao, M.-N.; Zhang, Y.; Ge, N.; Yu, L.; Wang, S.; Ren, Z.-H.; Guan, Z.-H., A Rh(III)-Catalyzed Regioselective Intermolecular Oxa-Pauson–Khand Reaction of Alkynes, Arylboronic Acids and CO to Form Butenolides. *Org. Chem. Front.* **2020**, *7*, 763–767.
- (8) Kadina, A. P.; Khlebnikov, A. F.; Novikov, M. S.; Perez, P. J.; Yufit, D. S., Intramolecular Cycloaddition of Azomethine Ylides, From Imines of O-Acylsalicylic Aldehyde and Ethyl Diazoacetate, to Ester Carbonyl--Experimental and DFT Computational Study. *Org. Biomol. Chem.* **2012**, *10*, 5582–5591.
- (9) Hoshimoto, Y.; Ohata, T.; Sasaoka, Y.; Ohashi, M.; Ogoshi, S., Nickel(0)-Catalyzed [2 + 2 + 1] Carbonylative Cycloaddition of Imines and Alkynes or Norbornene Leading to Gamma-Lactams. *J. Am. Chem. Soc.* **2014**, *136*, 15877–15880.
- (10) Nanda, T.; Ravikumar, P. C., A Palladium-Catalyzed Cascade C–C Activation of Cyclopropenone and Carbonylative Amination: Easy Access to Highly Functionalized Maleimide Derivatives. *Org. Lett.* **2020**, *22*, 1368–1374.

- (11) Kazuhiko, K.; Junji, O.; Kunihiko, K.; Hiroshi, Y.; Patrick, V.; Sonia, M.; Adalbert, B. Fluorescent Maleimides and Uses Thereof. 2001.
- (12) Hachiya, S.; Kasashima, Y.; Yagishita, F.; Mino, T.; Masu, H.; Sakamoto, M., Asymmetric Transformation by Dynamic Crystallization of Achiral Succinimides. *Chem. Commun.* **2013**, *49*, 4776–4778.
- (13) Driller, K. M.; Klein, H.; Jackstell, R.; Beller, M., Iron-Catalyzed Carbonylation: Selective and Efficient Synthesis of Succinimides. *Angew. Chem., Int. Ed* **2009**, *48*, 6041–6044.
- (14) Frisch, M. J., et al. Gaussian 16 Revision A.03. 2016.
- (15) Linder, M.; Brinck, T., On the Method-Dependence of Transition State Asynchronicity in Diels–Alder Reactions. *Phys. Chem. Chem. Phys.* **2013**, *15*, 5108–5114.
- (16) (a) Ditchfield, R.; Hehre, W. J.; Pople, J. A., Self-Consistent Molecular-Orbital Methods. IX. An Extended Gaussian-Type Basis for Molecular-Orbital Studies of Organic Molecules. *J. Chem. Phys.* **1971**, *54*, 724–728; (b) Hehre, W. J.; Ditchfield, R.; Pople, J. A., Self—Consistent Molecular Orbital Methods. XII. Further Extensions of Gaussian—Type Basis Sets for Use in Molecular Orbital Studies of Organic Molecules. *J. Chem. Phys.* **1972**, *56*, 2257–2261; (c) Chai, J.-D.; Head-Gordon, M., Long-Range Corrected Hybrid Density Functionals With Damped Atom–Atom Dispersion Corrections. *Phys. Chem. Chem. Phys.* **2008**, *10*, 6615–6620.
- (17) (a) Hariharan, P. C.; Pople, J. A., The Influence of Polarization Functions on Molecular Orbital Hydrogenation Energies. *Theor. Chim. Acta.* **1973**, *28*, 213–222; (b) Tomasi, J.; Mennucci, B.; Cammi, R., Quantum Mechanical Continuum Solvation Models. *Chem. Rev.* **2005**, *105*, 2999–3094; (c) Marenich, A. V.; Cramer, C. J.; Truhlar, D. G., Universal Solvation Model Based on Solute Electron Density and on a Continuum Model of the Solvent Defined by the Bulk Dielectric Constant and Atomic Surface Tensions. *J. Phys. Chem. B* **2009**, *113*, 6378–6396.
- (18) (a) Grimme, S., Exploration of Chemical Compound, Conformer, and Reaction Space with Meta-Dynamics Simulations Based on Tight-Binding Quantum Chemical Calculations. *J. Chem. Theory Comput.* **2019**, *15*, 2847–2862; (b) Pracht, P.; Bohle, F.; Grimme, S., Automated Exploration of the Low-Energy Chemical Space With Fast Quantum Chemical Methods. *Phys. Chem. Chem. Phys.* **2020**, *22*, 7169–7192.
- (19) (a) Fukui, K., Formulation of the Reaction Coordinate. *J. Phys. Chem.* **1970**, *74*, 4161–4163; (b) Fukui, K., The Path of Chemical Reactions - the IRC Approach. *Acc. Chem. Res.* **1981**, *14*, 363–368.
- (20) Luchini, G.; Alegre-Requena, J.; Funes-Ardoiz, I.; Paton, R., GoodVibes: automated thermochemistry for heterogeneous computational chemistry data [version 1; peer review: 2 approved with reservations]. *F1000Research* **2020**, *9*.
- (21) (a) Grimme, S., Supramolecular Binding Thermodynamics by Dispersion-Corrected Density Functional Theory. *Chem–Eur. J.* **2012**, *18*, 9955–9964; (b) Li, Y.-P.; Gomes, J.; Mallikarjun



Sharada, S.; Bell, A. T.; Head-Gordon, M., Improved Force-Field Parameters for QM/MM Simulations of the Energies of Adsorption for Molecules in Zeolites and a Free Rotor Correction to the Rigid Rotor Harmonic Oscillator Model for Adsorption Enthalpies. *J. Phys. Chem. C* **2015**, *119*, 1840–1850.

(22) CYLview20; Legault, C. Y., Université de Sherbrooke, 2020 (<http://www.cylview.org>).

(23) Delano, W. L. The PyMOL molecular graphics system; Delano Scientific, 2002.

## 8. NMR Spectra Copies

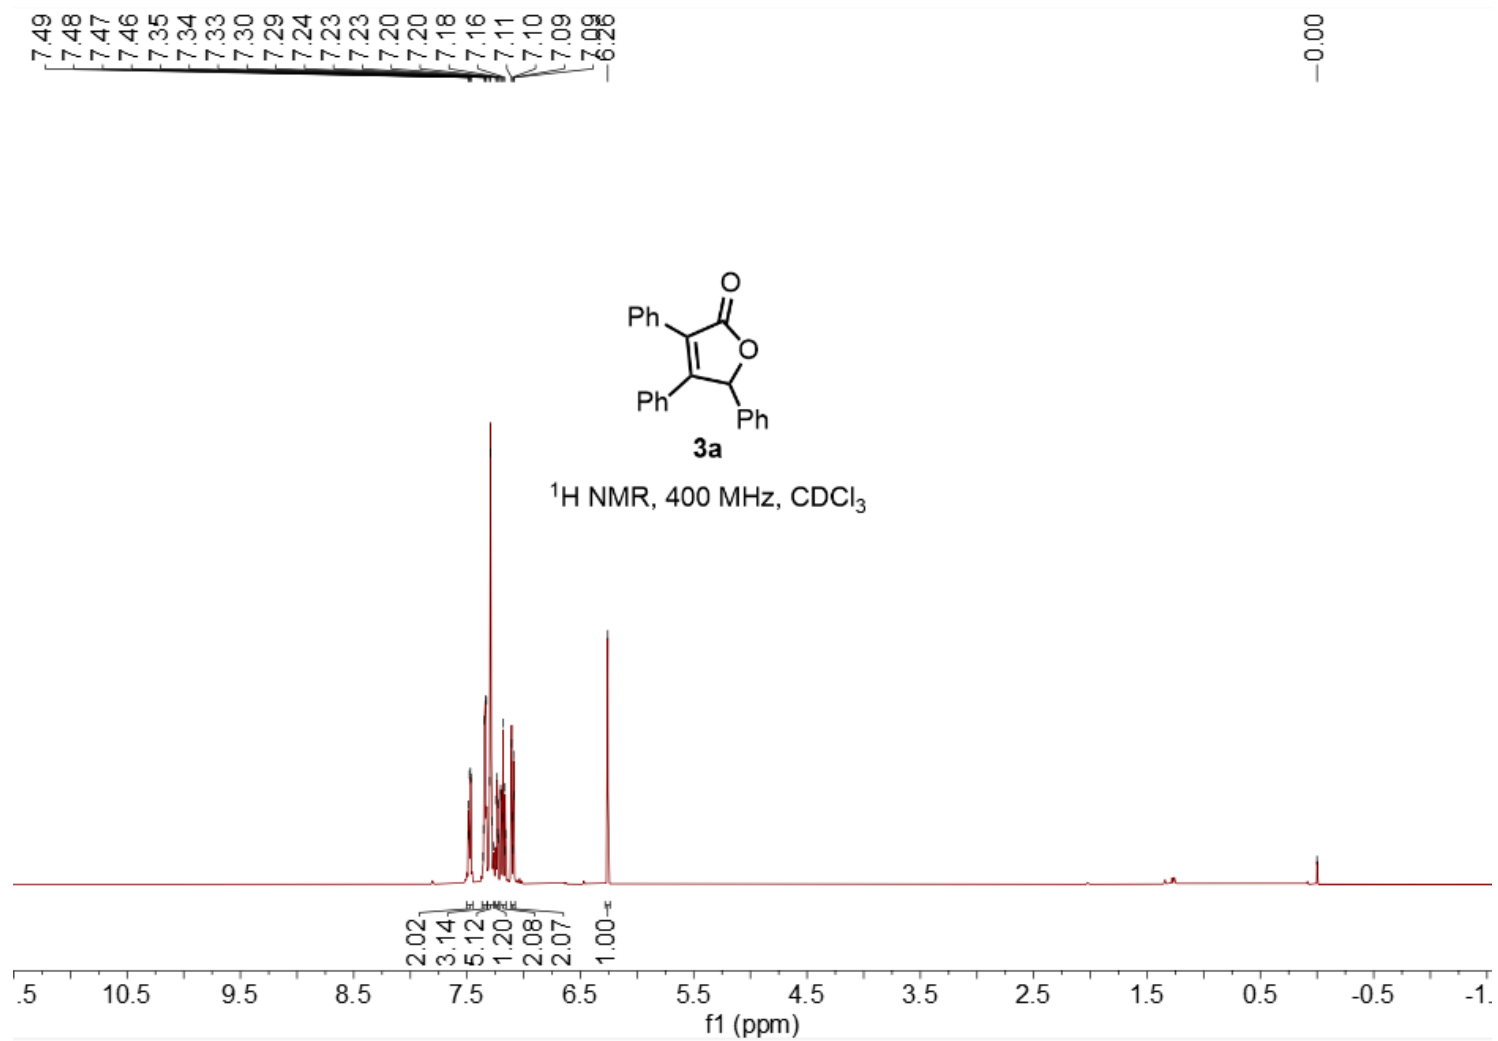

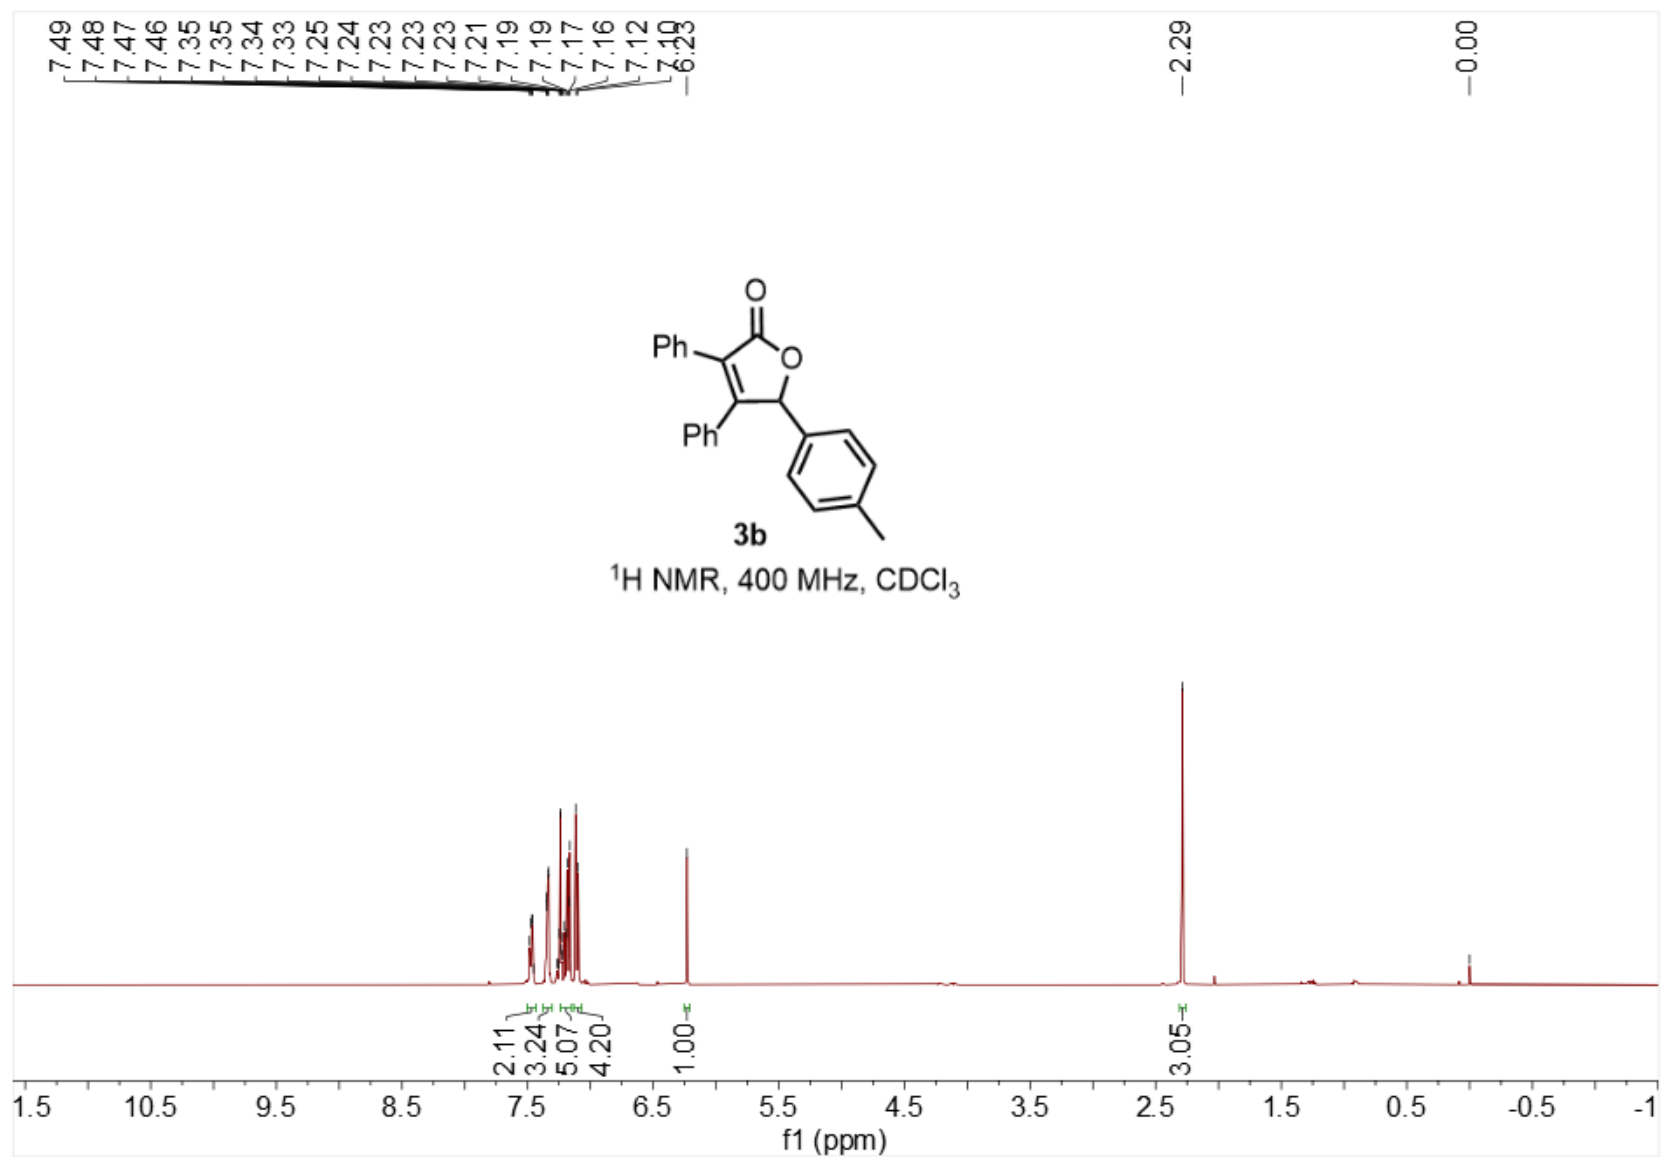

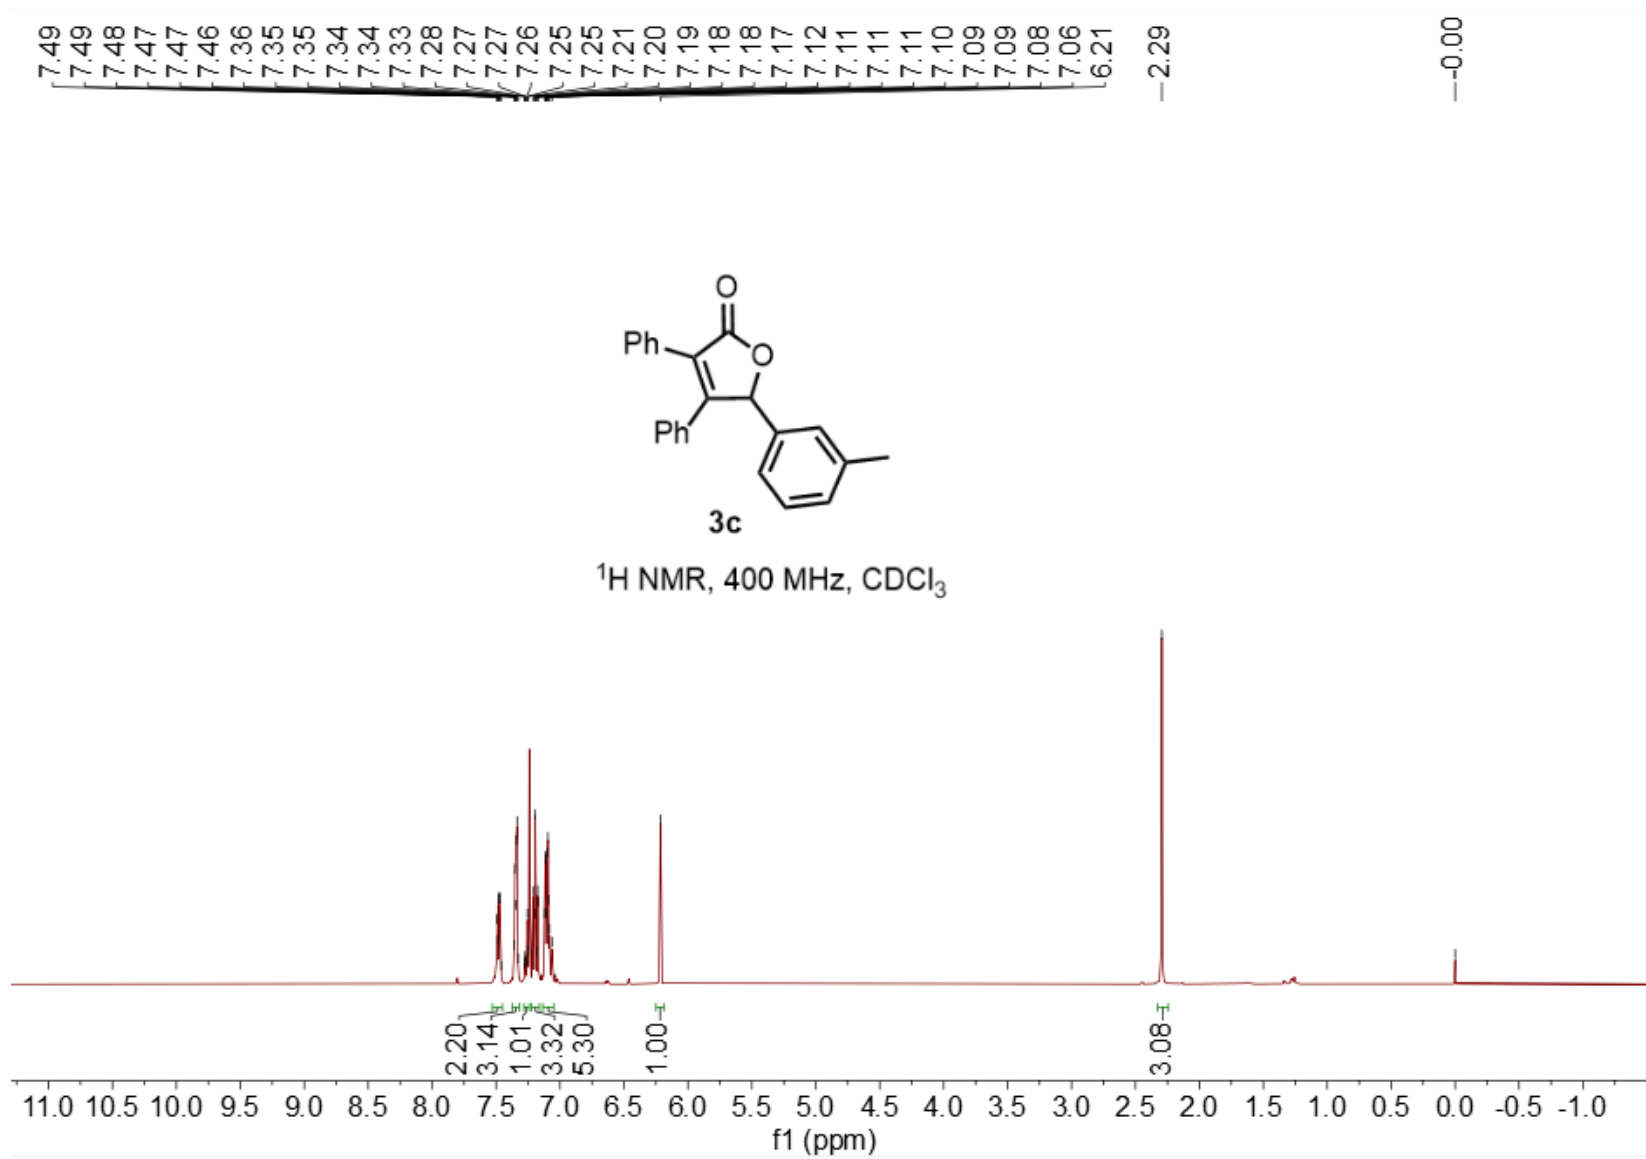

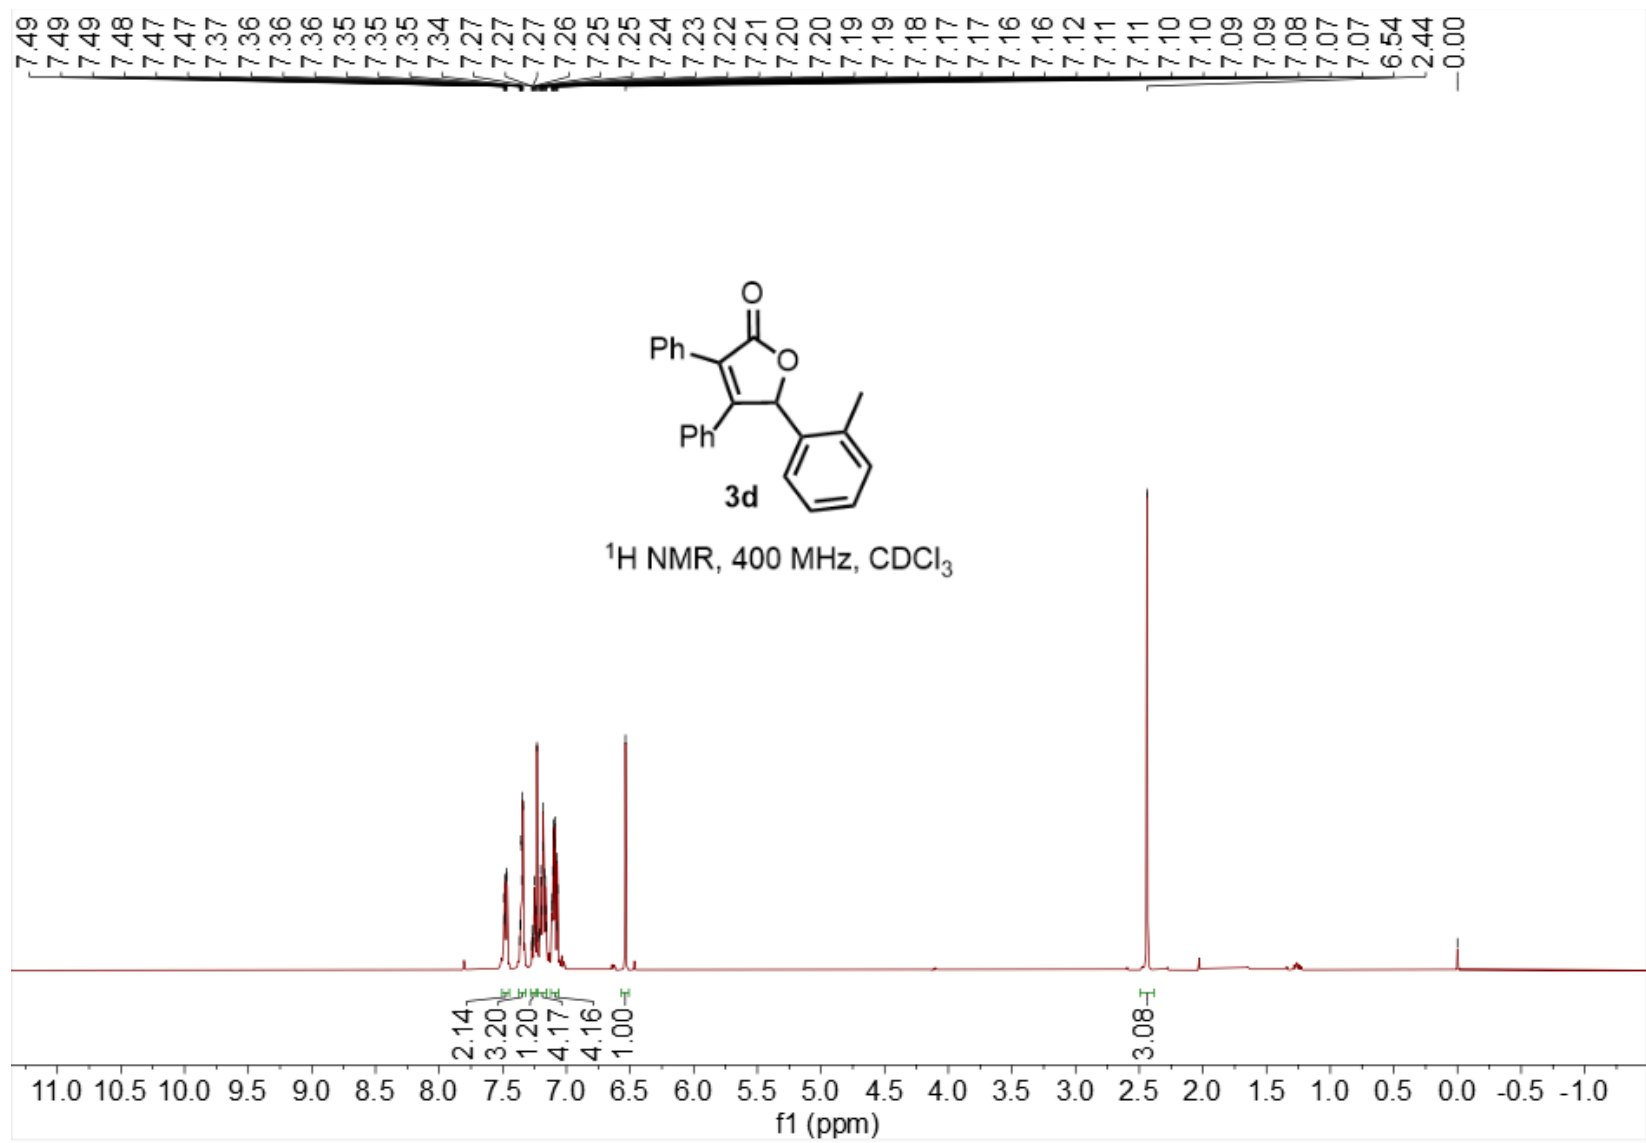

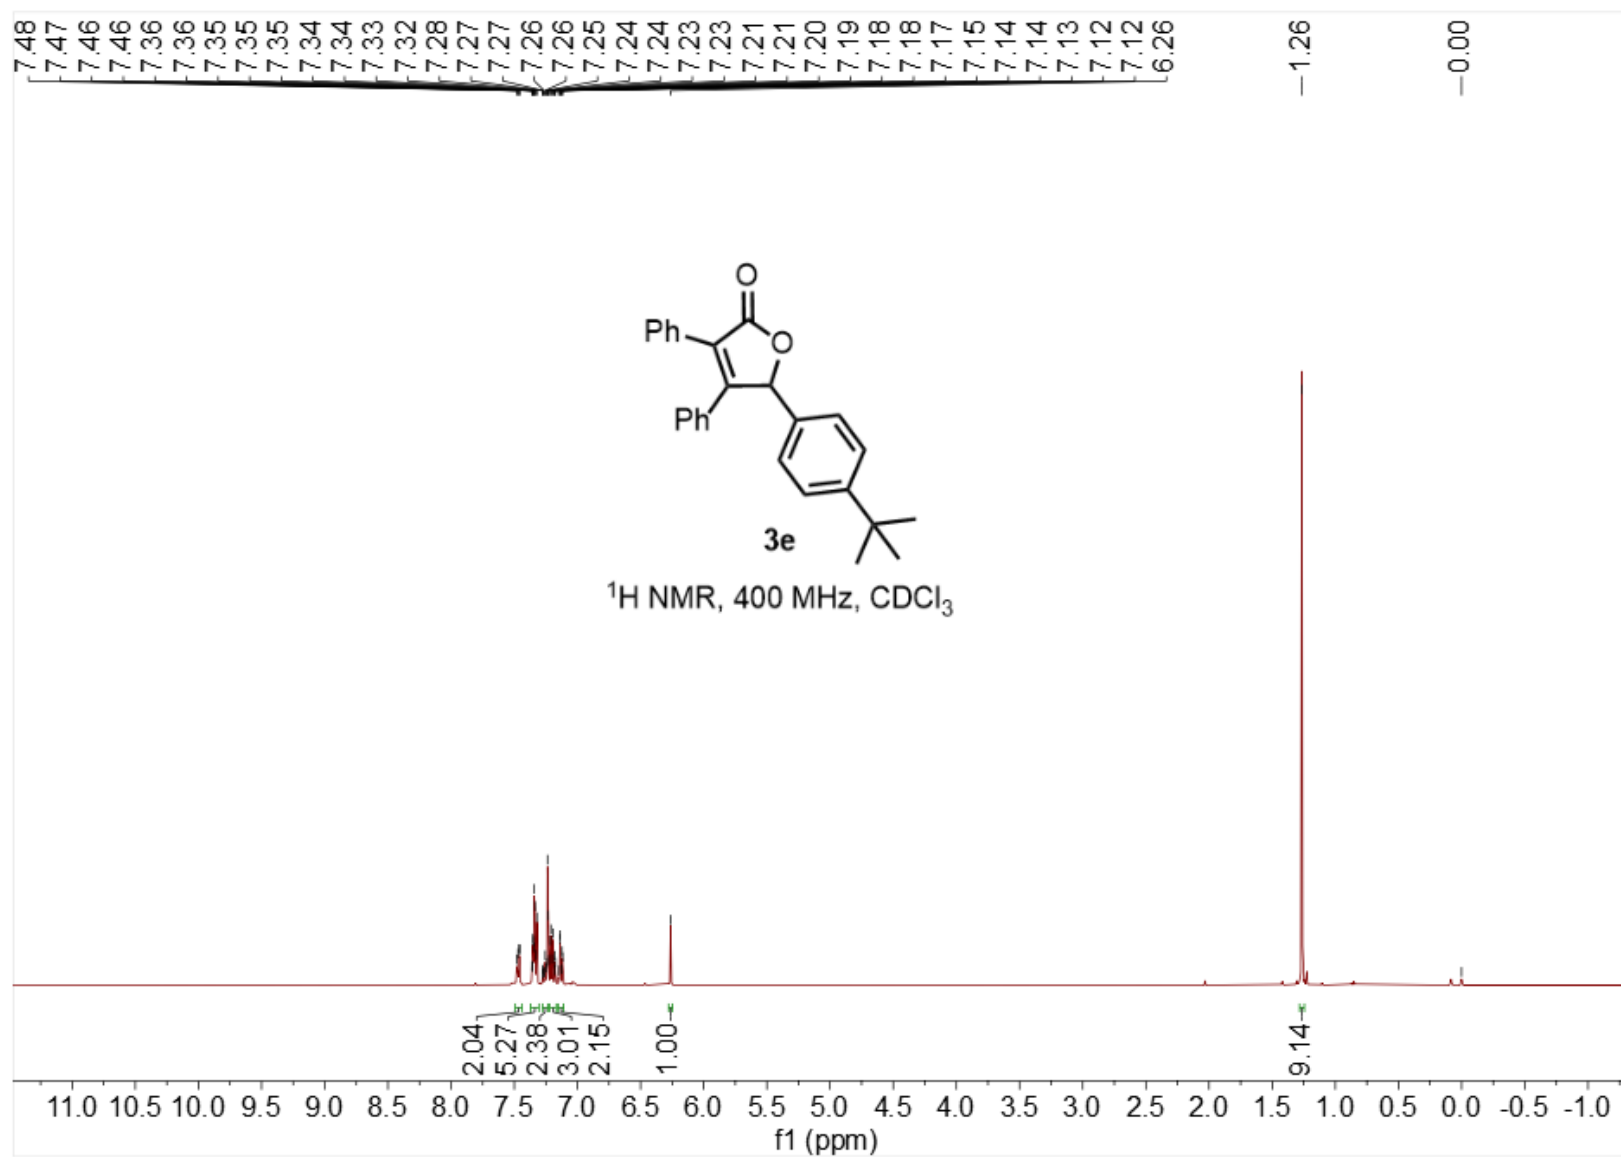

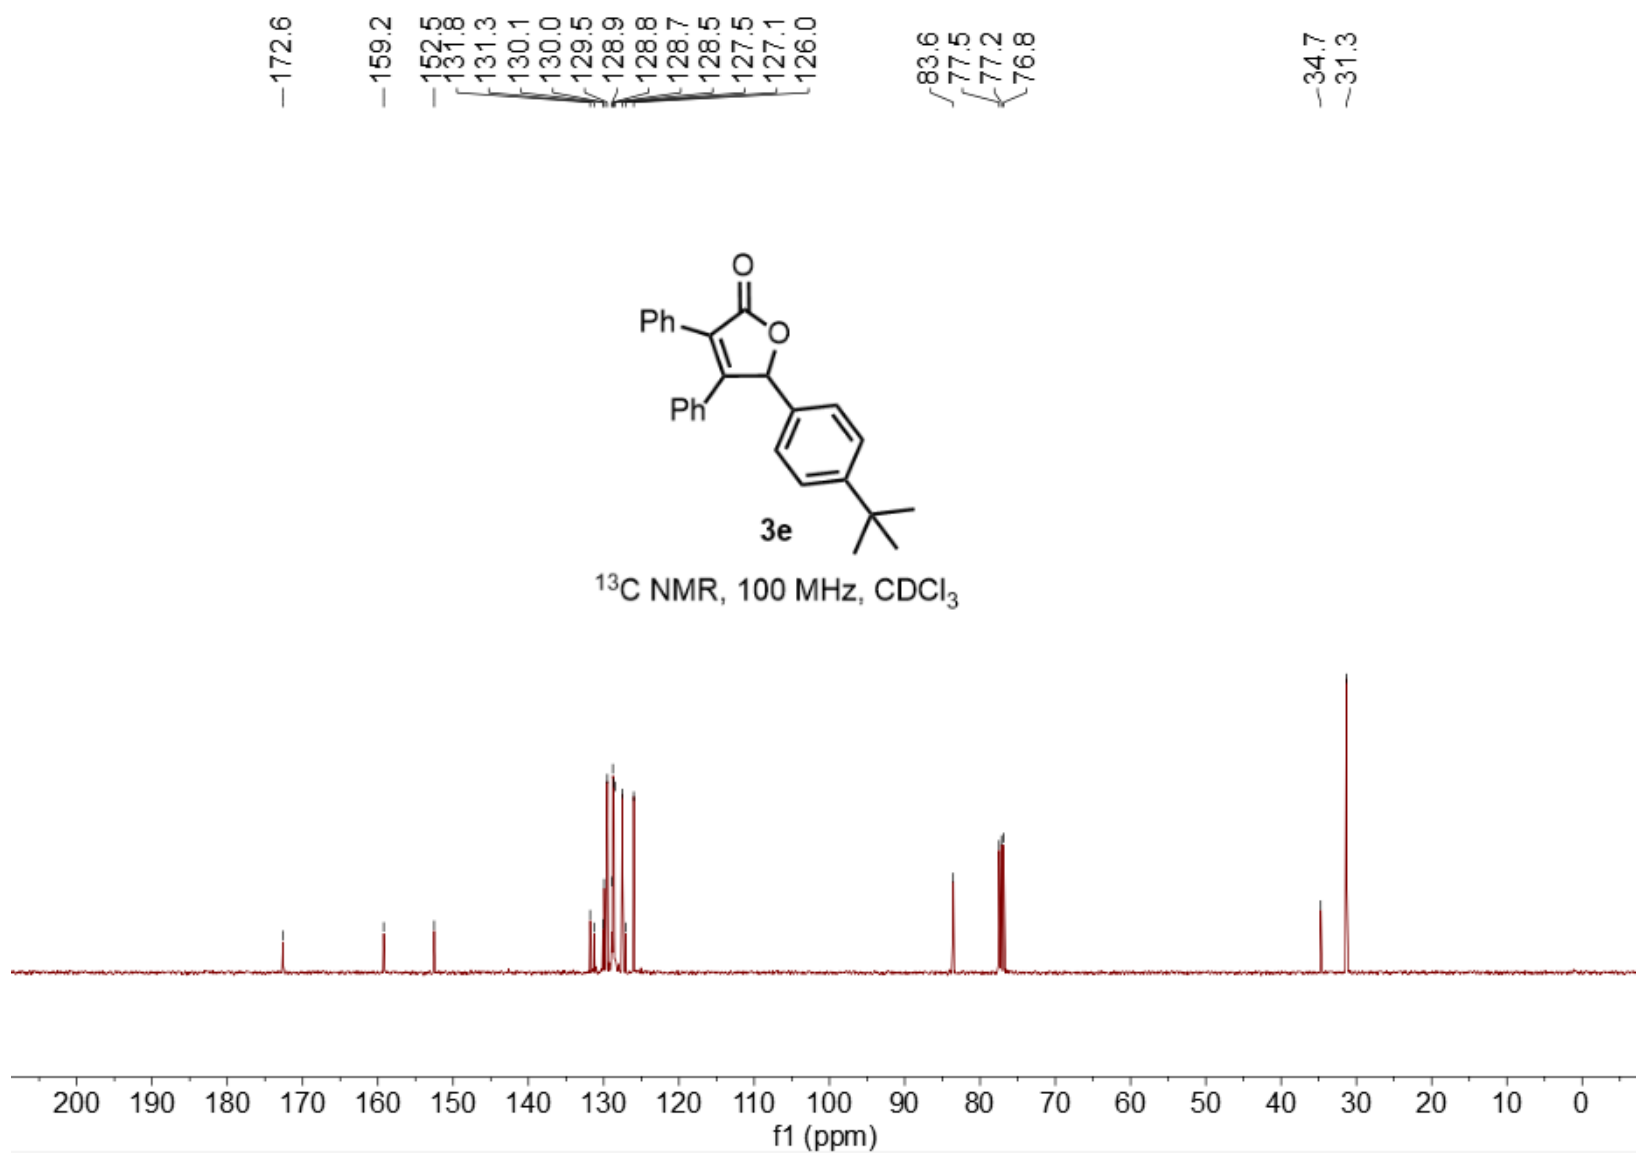

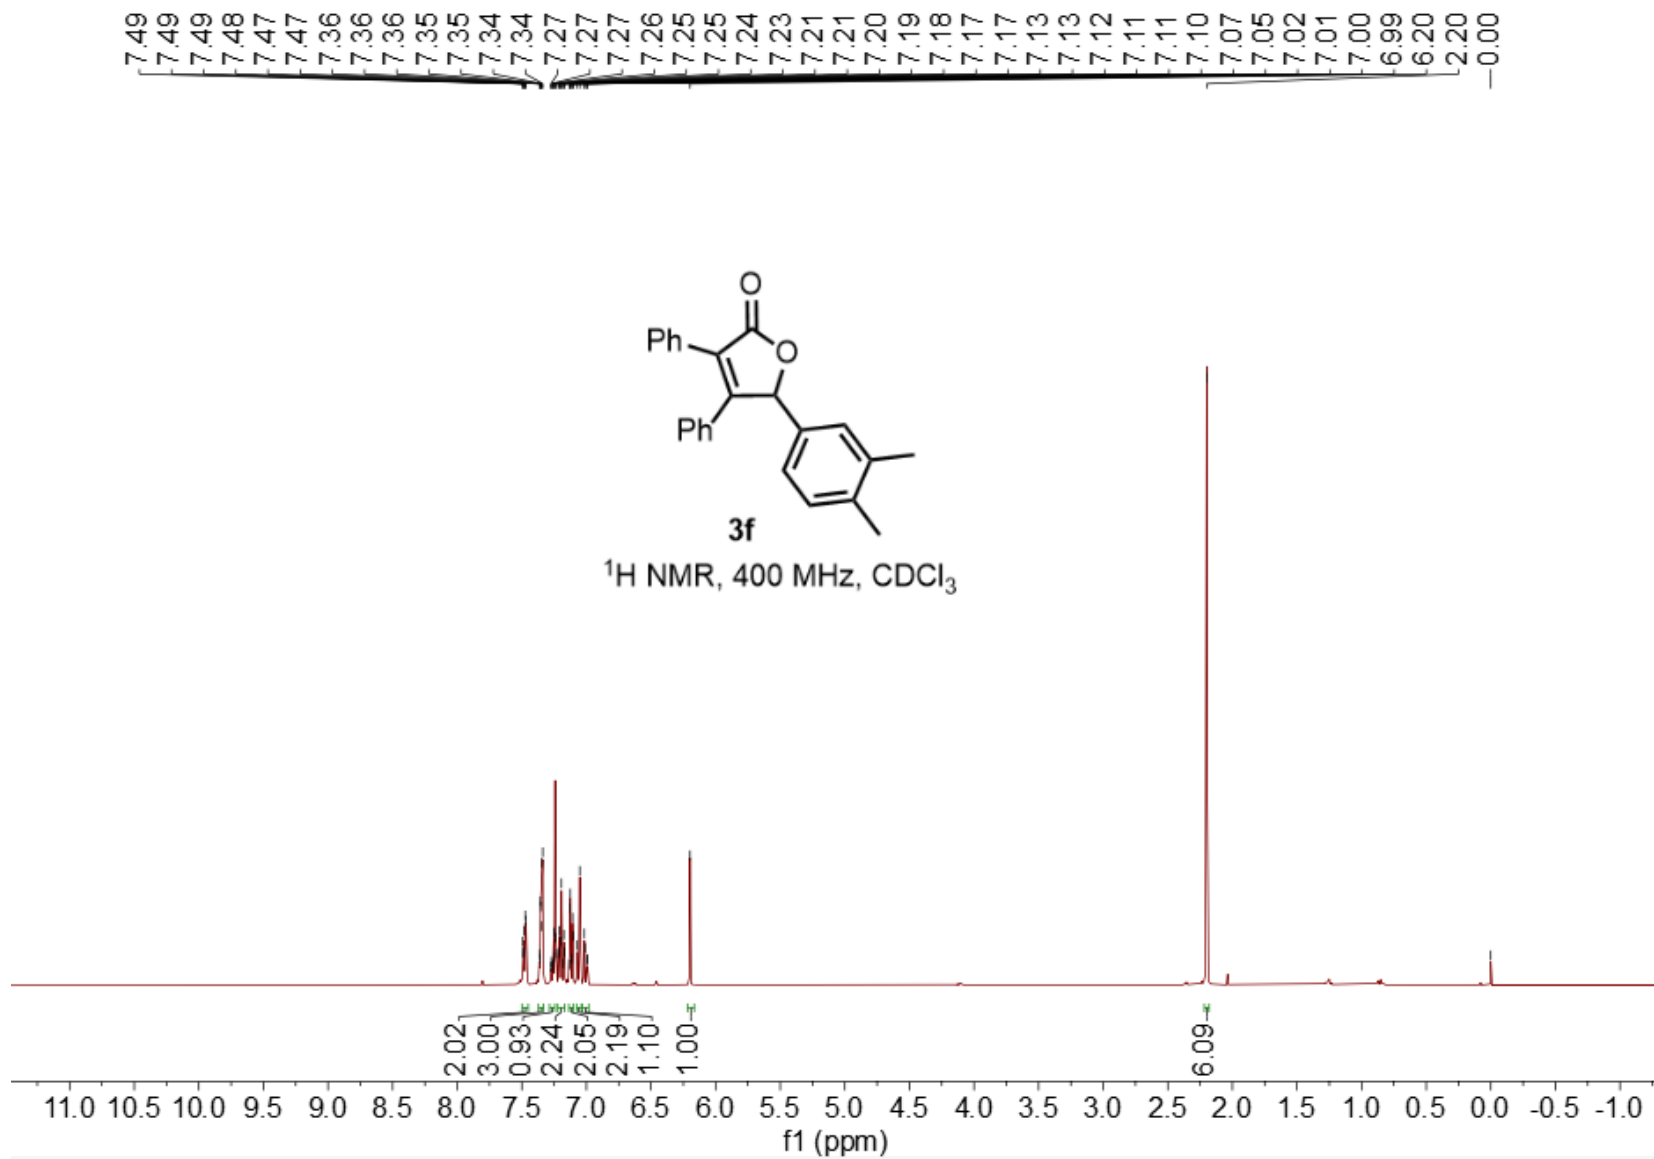



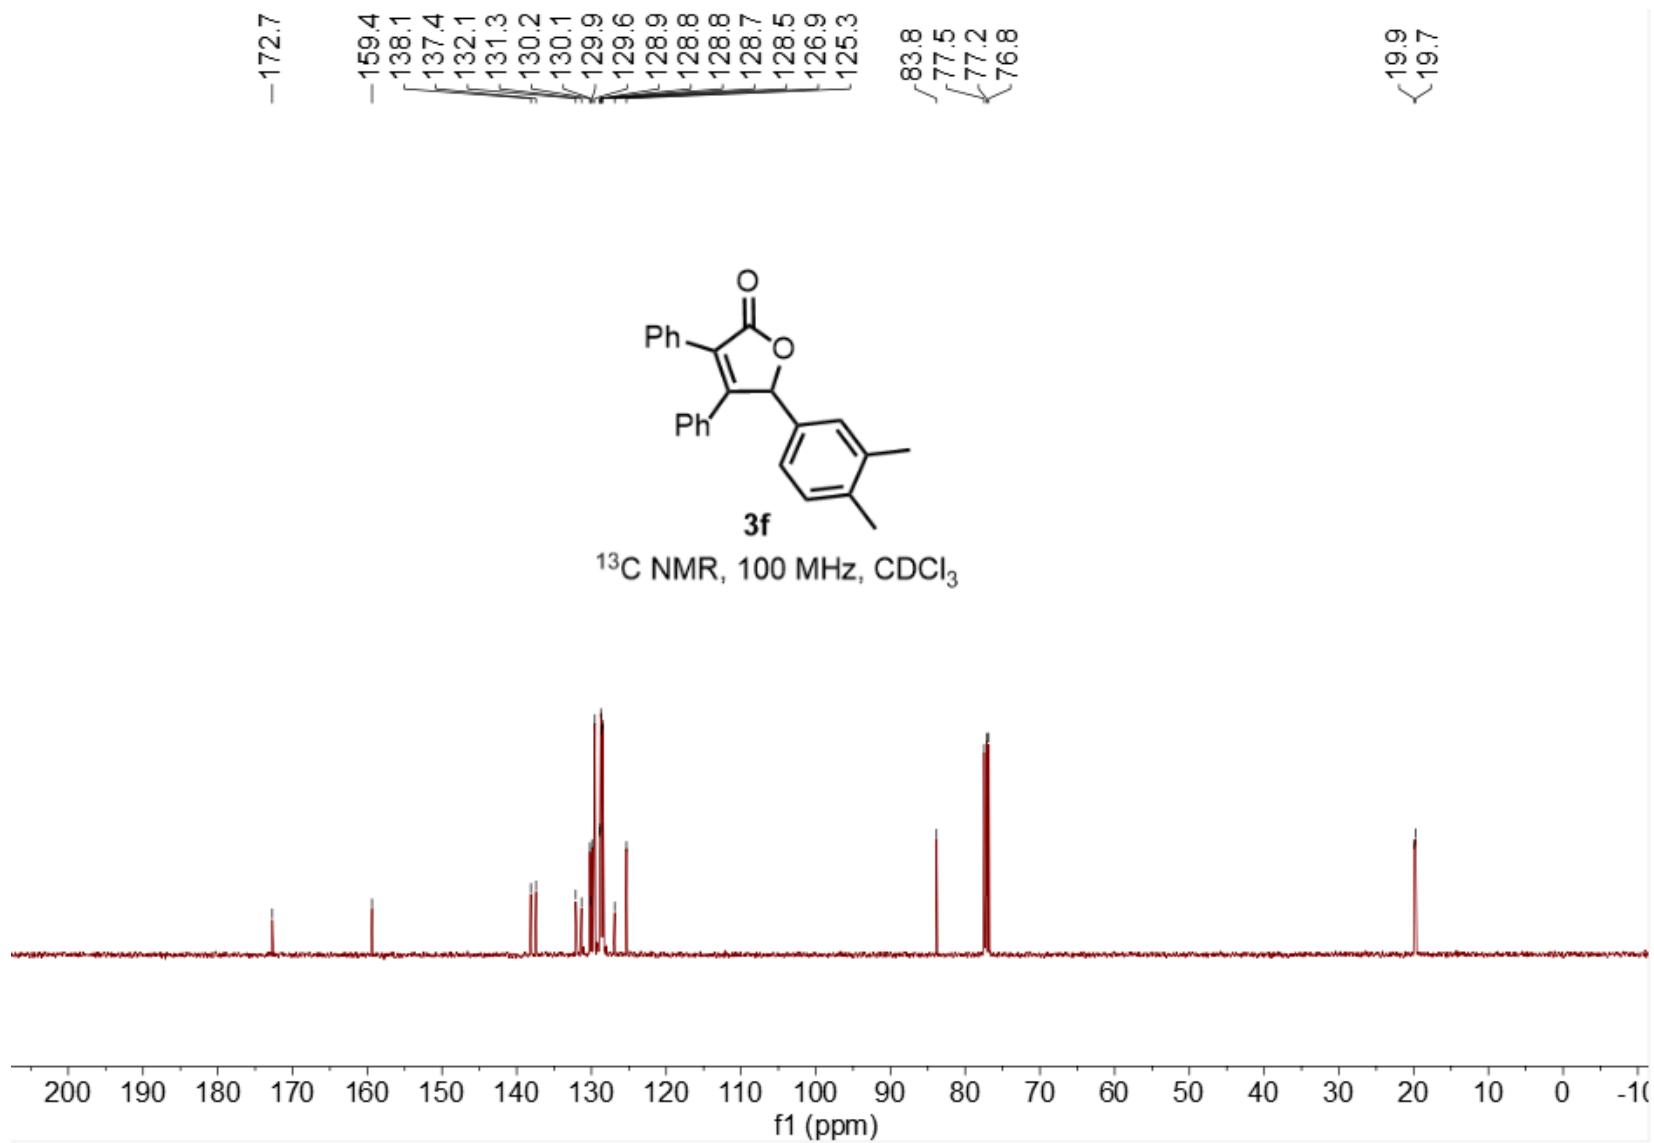

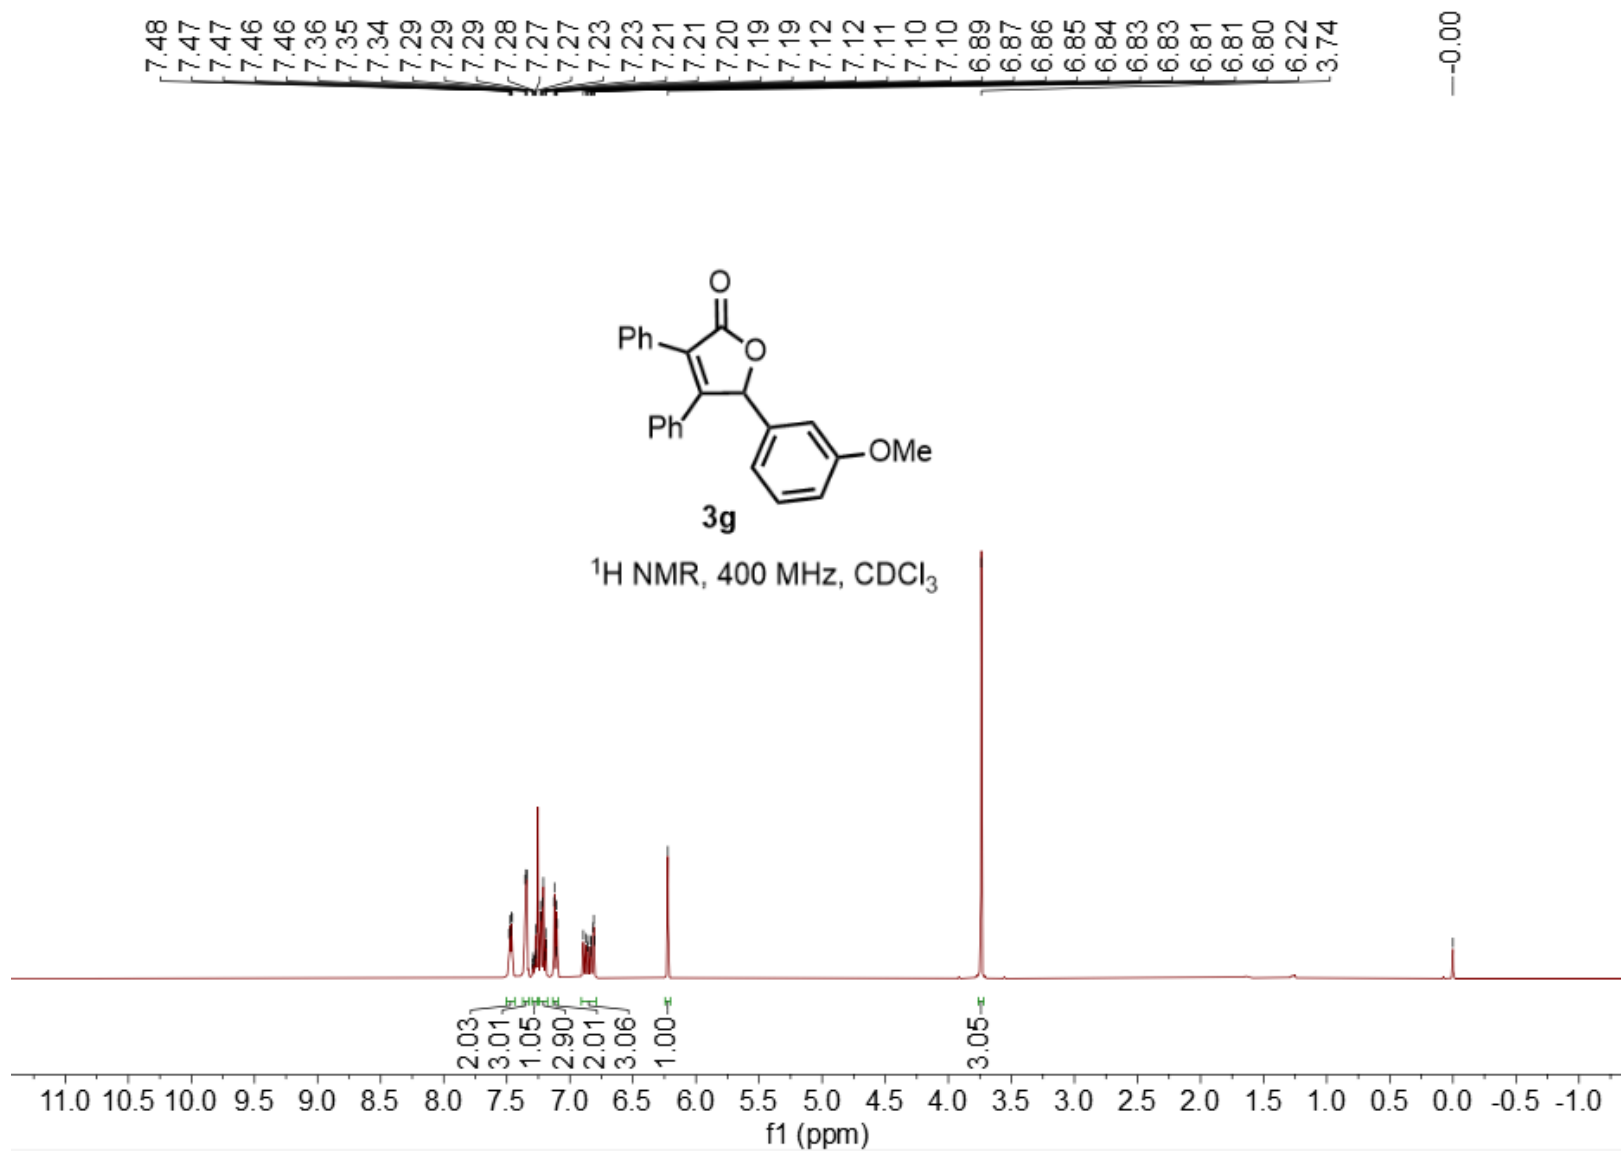

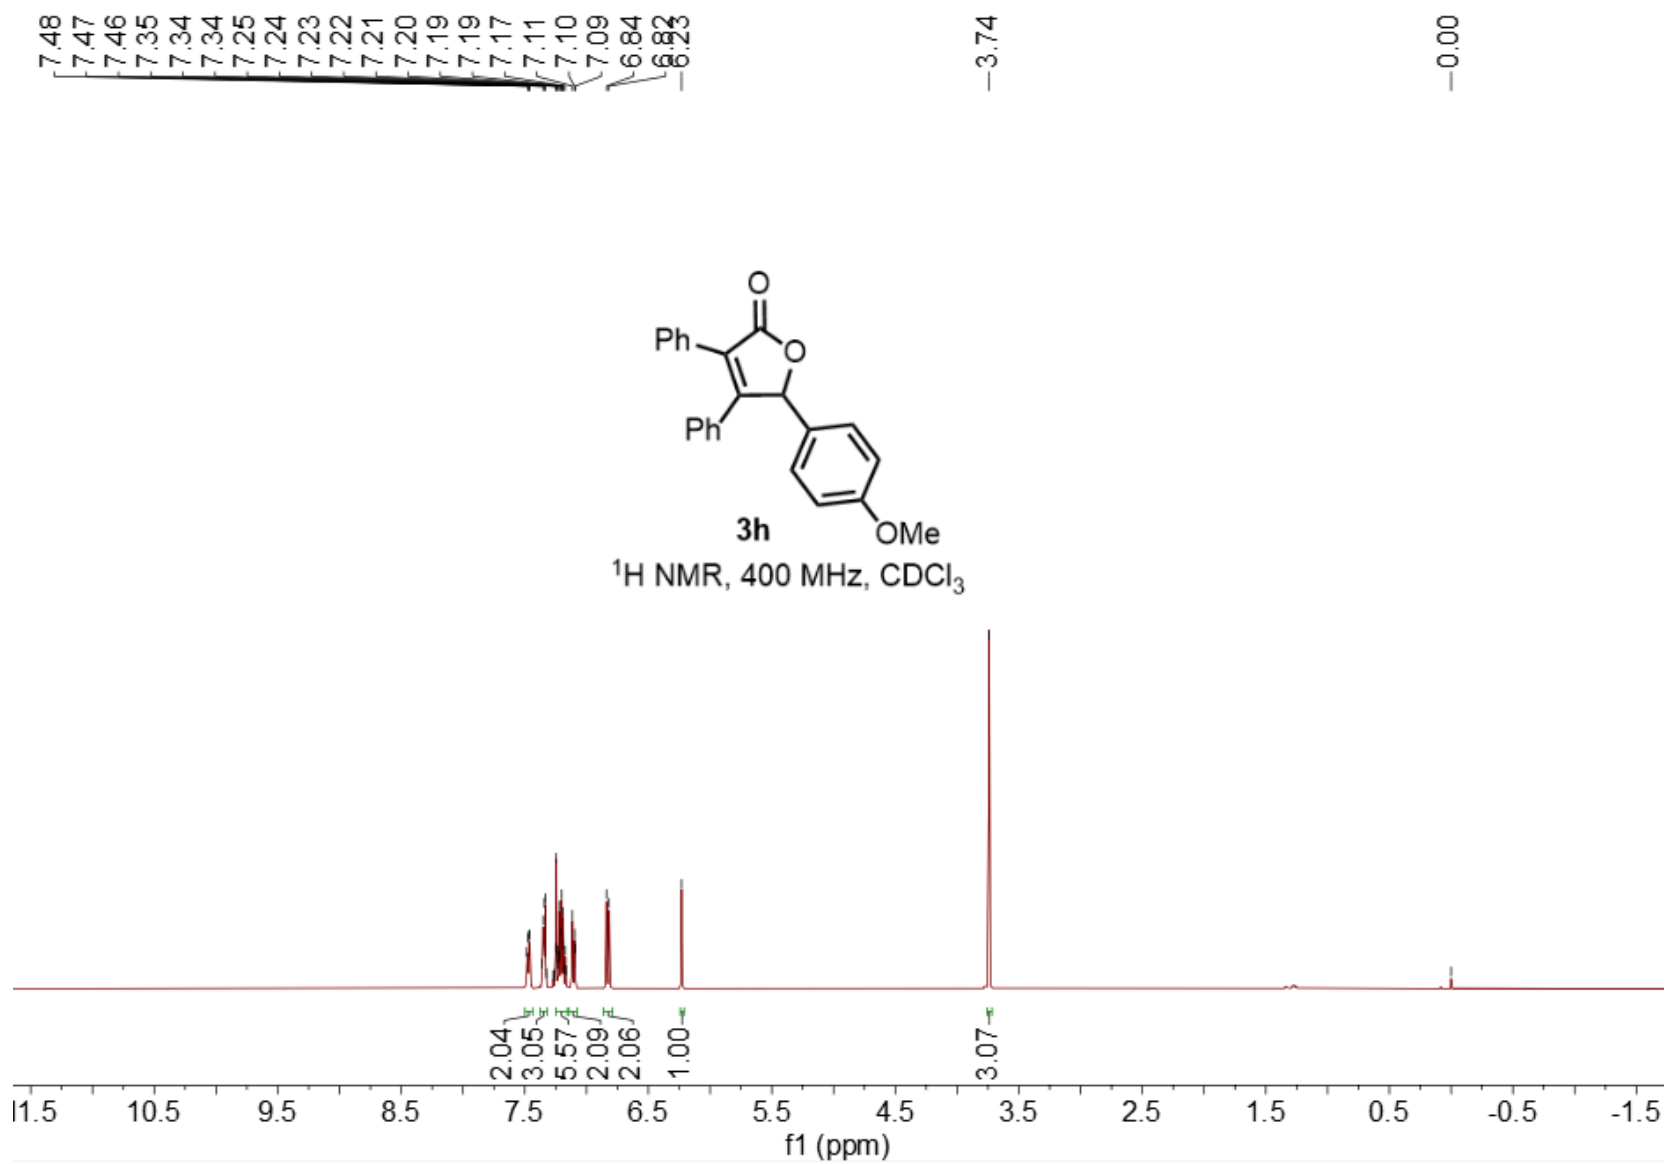

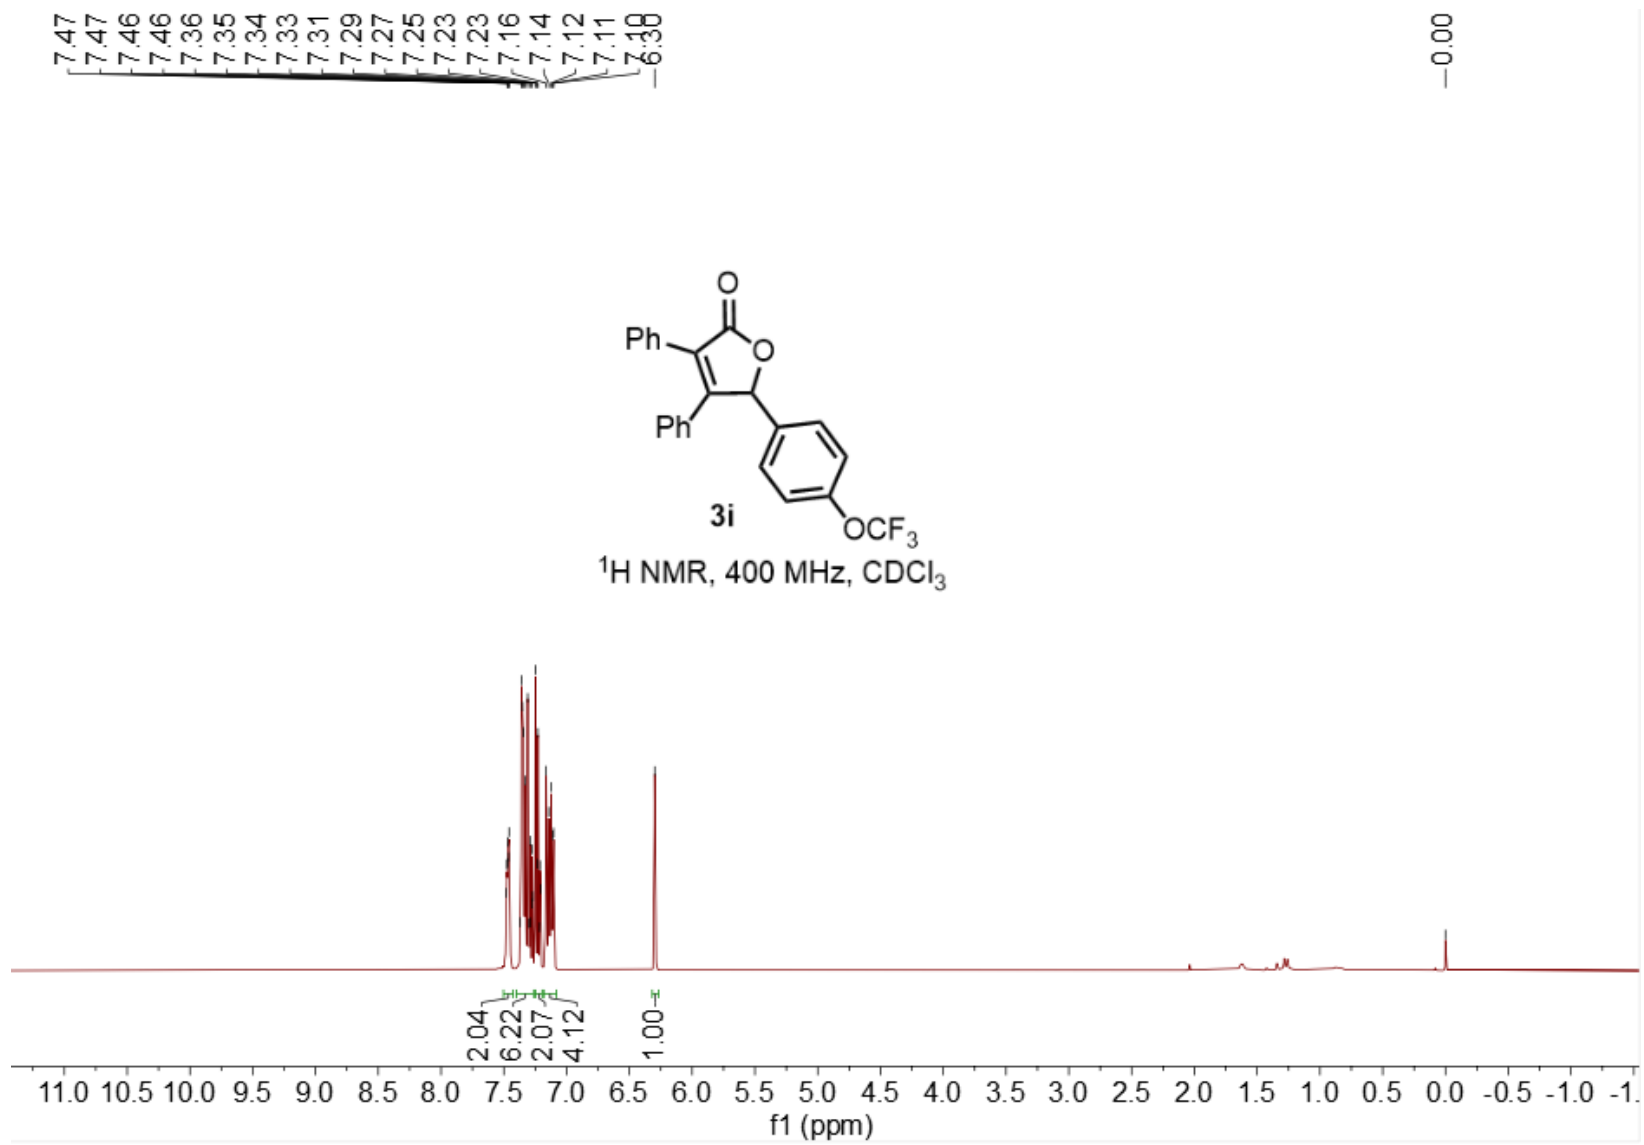

-172.3  
-159.1  
-149.8  
133.6  
130.9  
130.2  
129.7  
129.5  
129.3  
129.1  
129.0  
128.7  
128.4  
127.2  
121.7  
121.3  
119.1  
82.7  
77.5  
77.2  
76.8

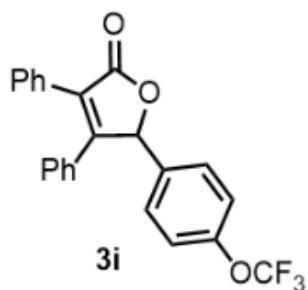

<sup>13</sup>C NMR, 100 MHz, CDCl<sub>3</sub>

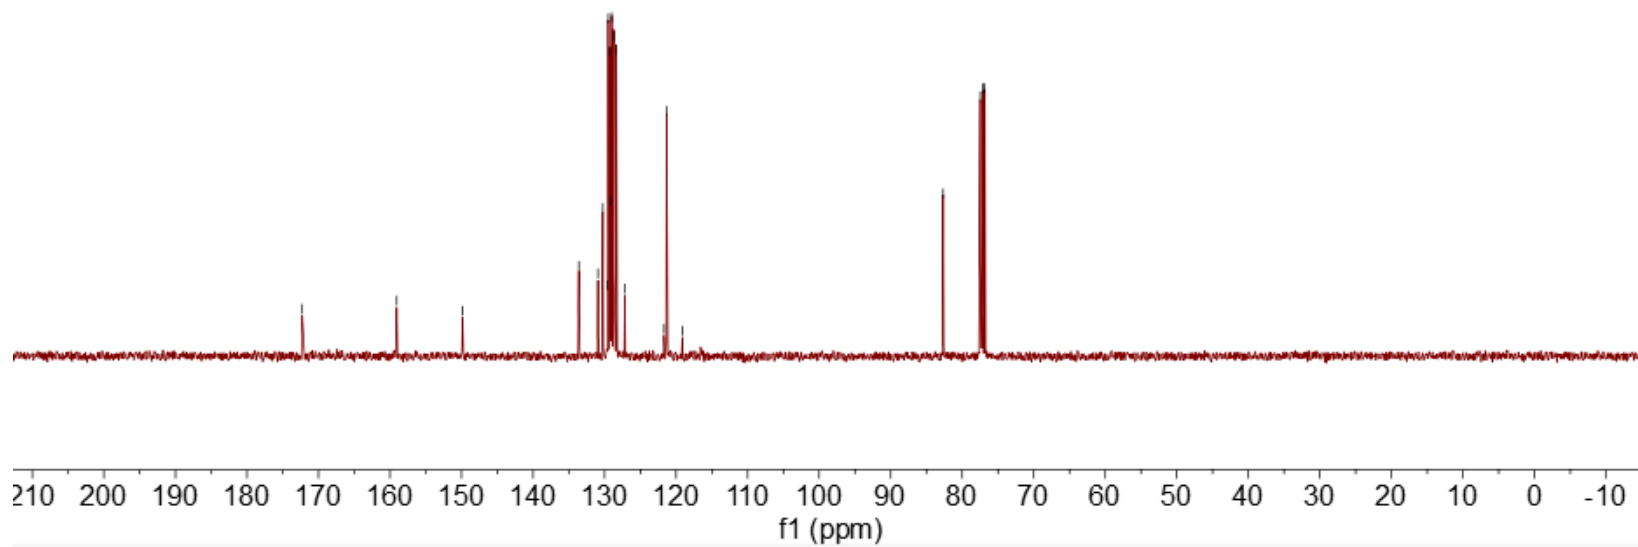

--57.6

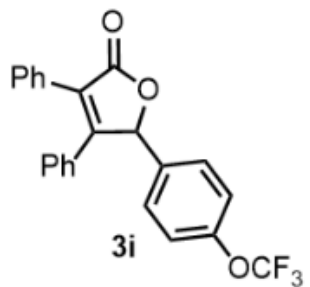

<sup>19</sup>F NMR, 376 MHz, CDCl<sub>3</sub>

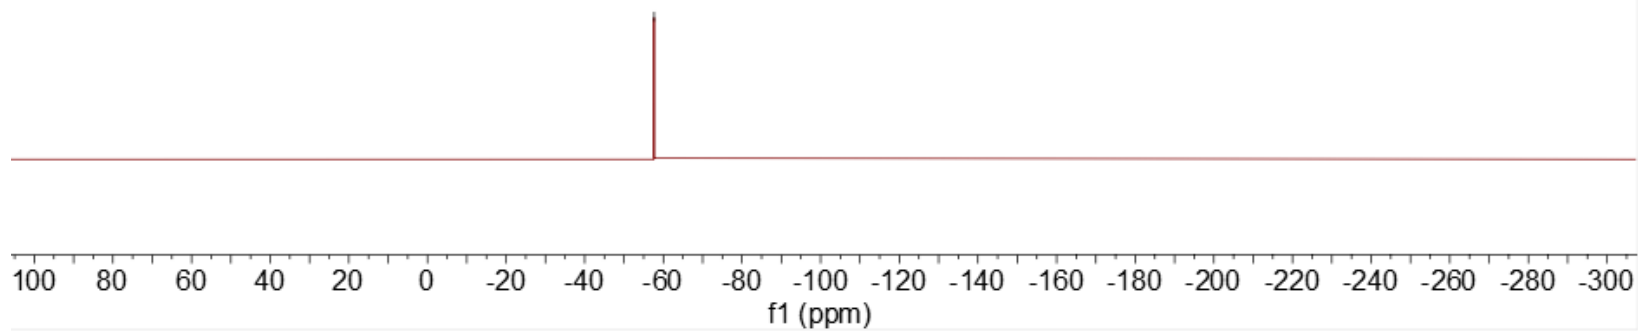

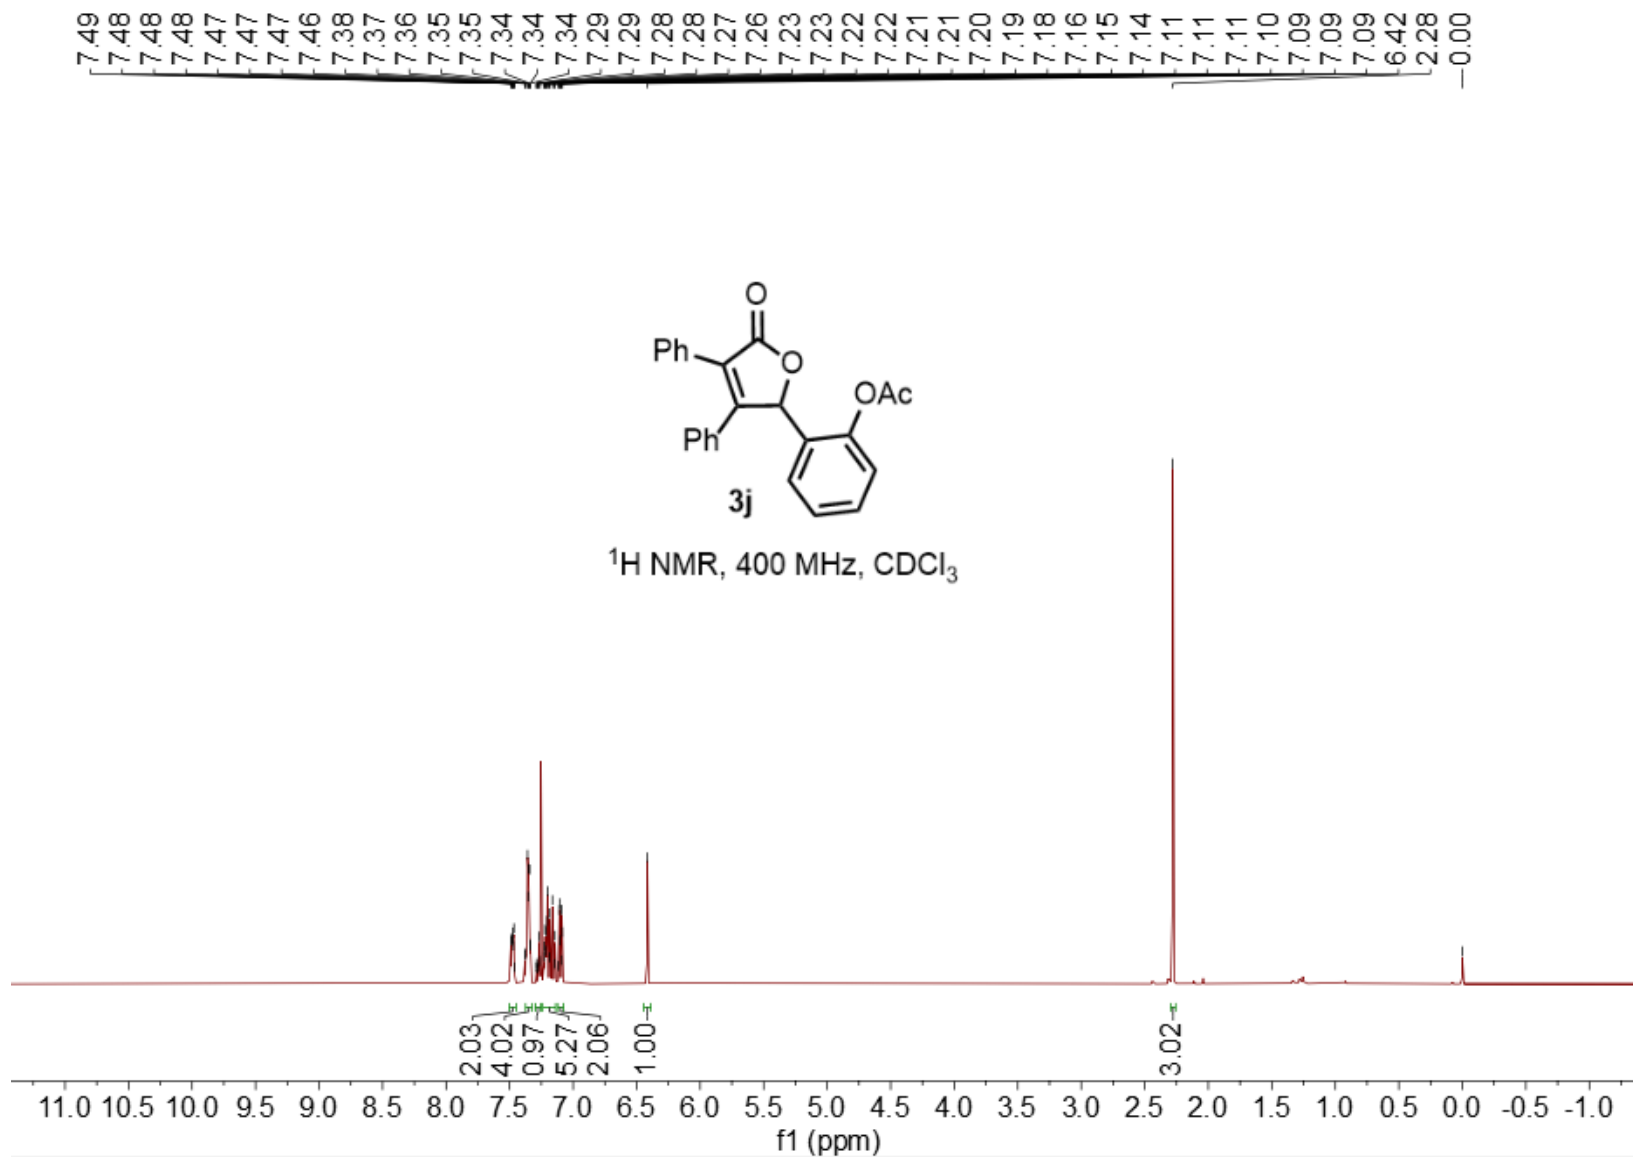

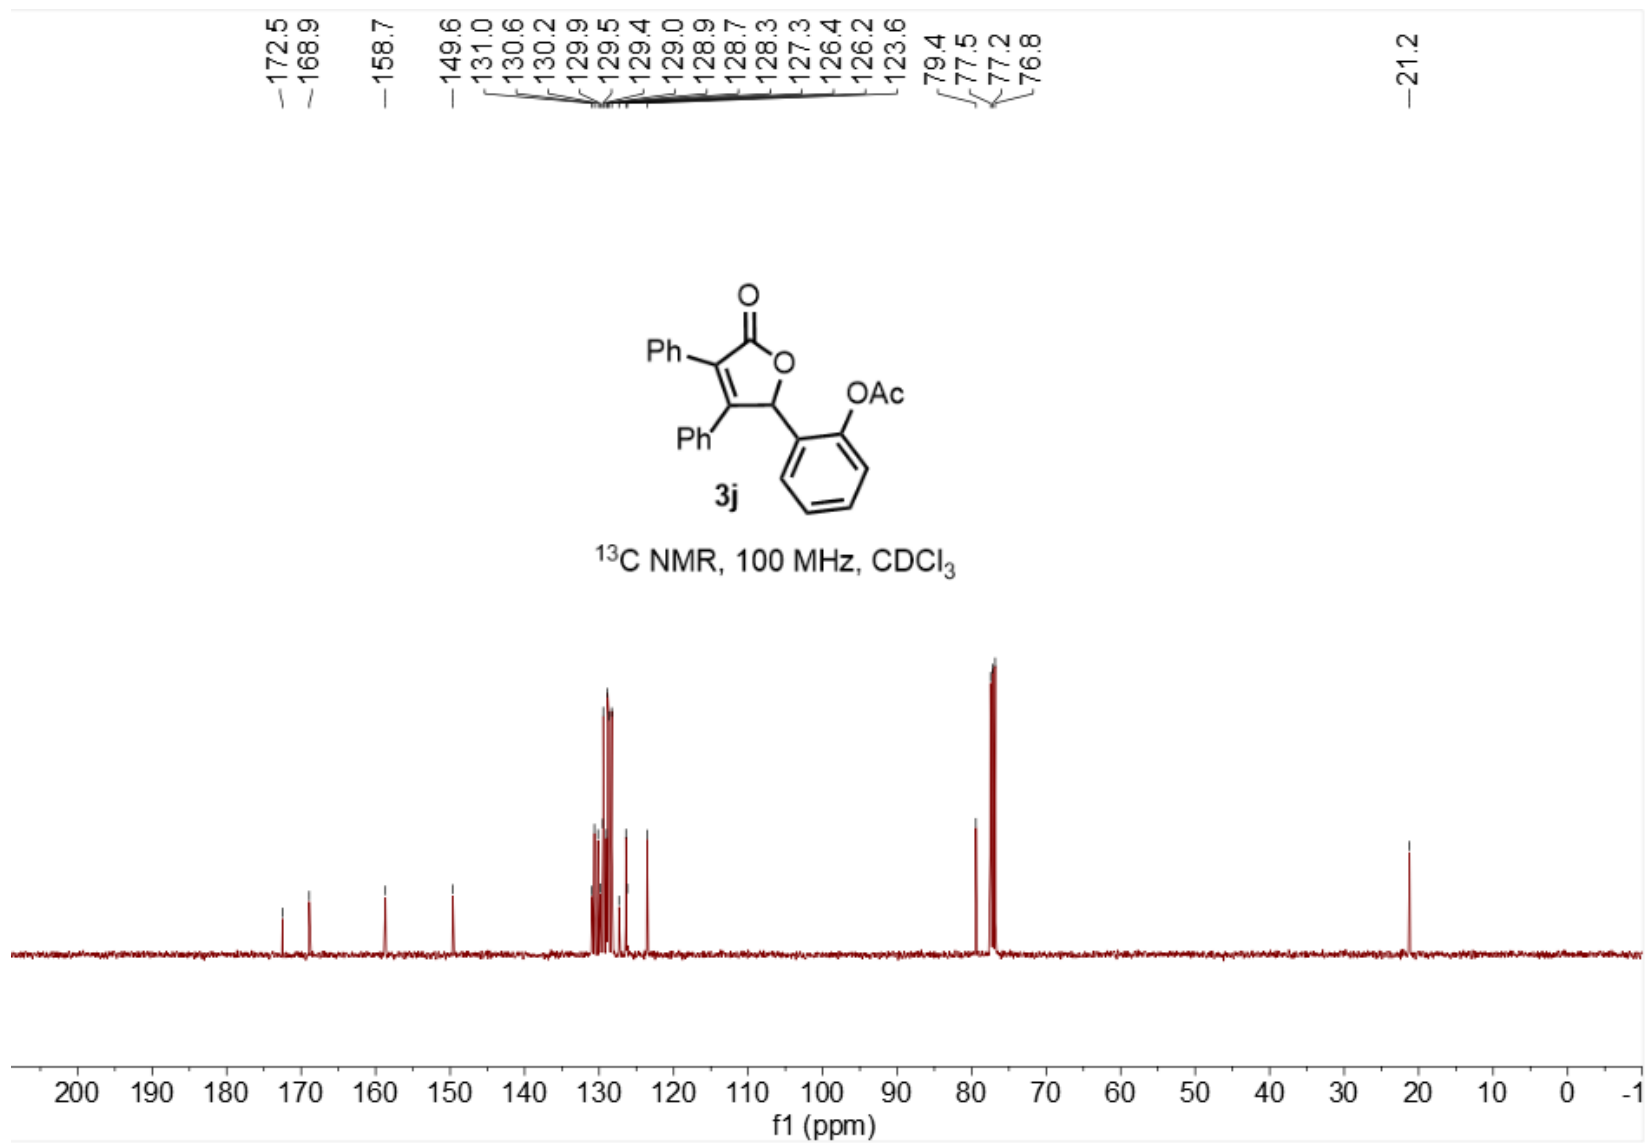



7.49  
7.48  
7.48  
7.47  
7.47  
7.46  
7.45  
7.37  
7.36  
7.36  
7.35  
7.35  
7.35  
7.34  
7.34  
7.33  
7.30  
7.29  
7.29  
7.28  
7.28  
7.27  
7.27  
7.27  
7.26  
7.26  
7.25  
7.24  
7.23  
7.23  
7.22  
7.21  
7.20  
7.19  
7.19  
7.12  
7.12  
7.11  
7.11  
7.10  
7.10  
7.09  
7.02  
7.01  
7.00  
6.99  
6.99  
6.98  
6.97  
6.27  
0.00

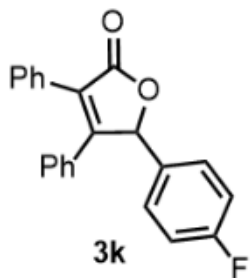

<sup>1</sup>H NMR, 400 MHz, CDCl<sub>3</sub>

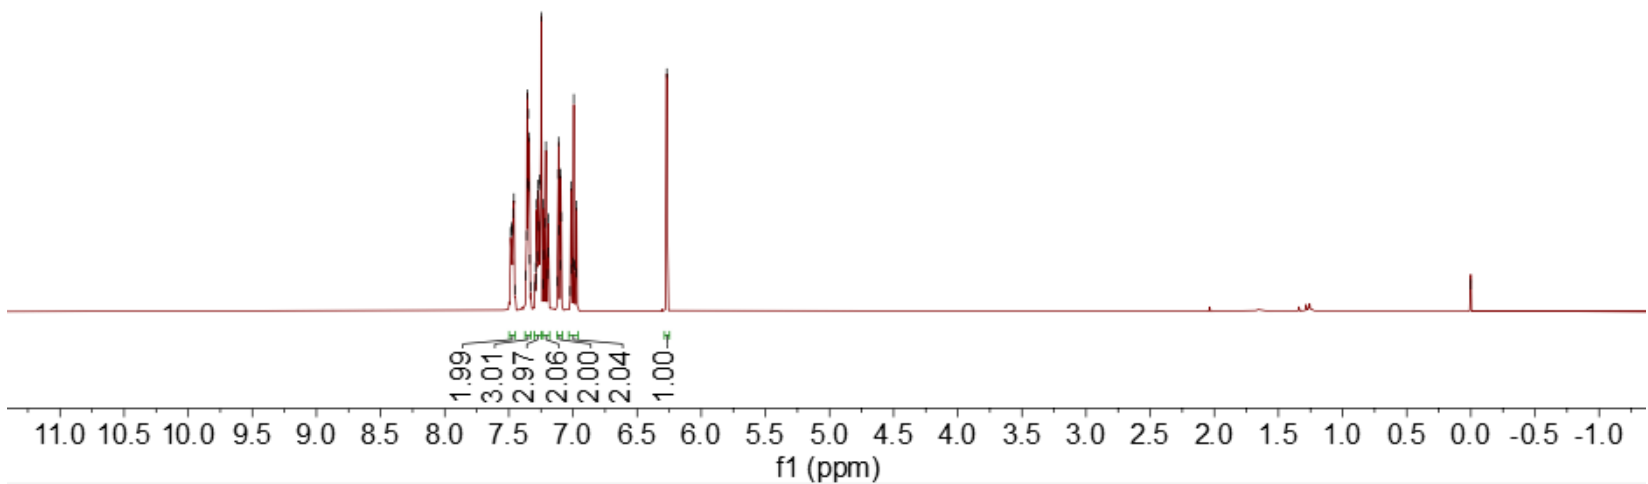

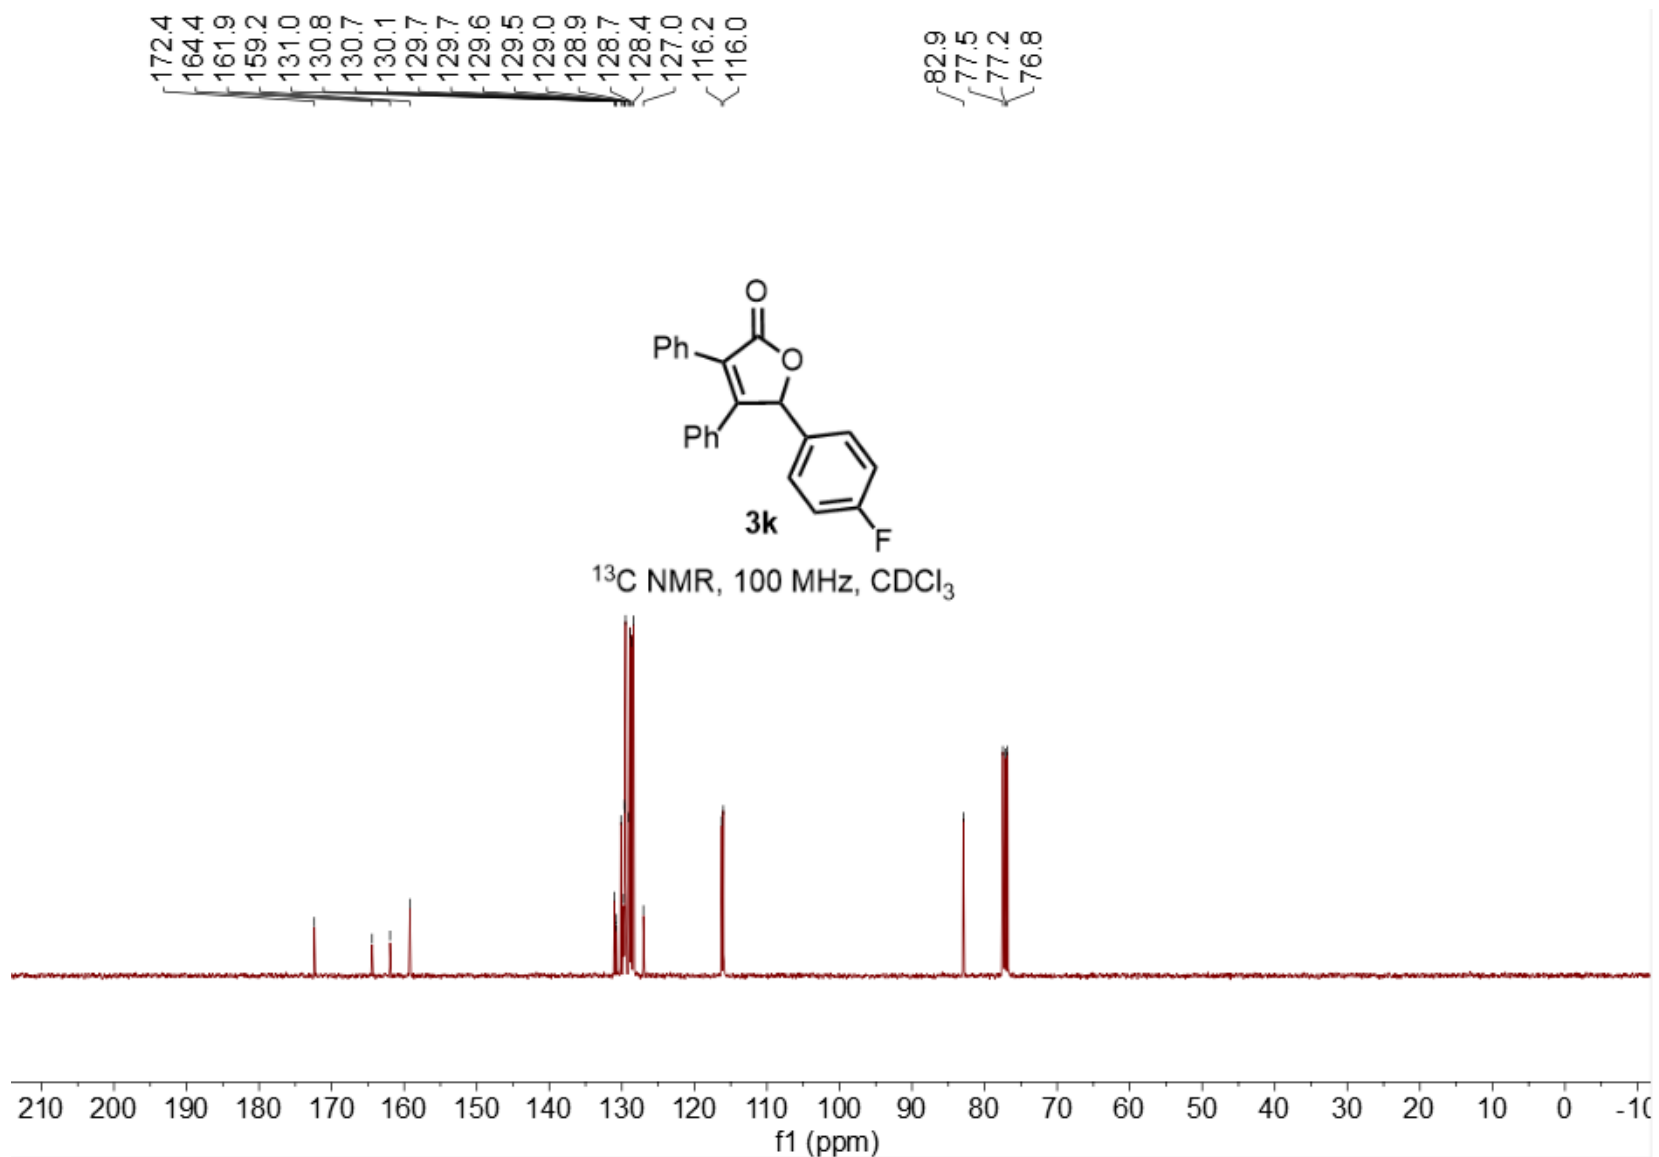

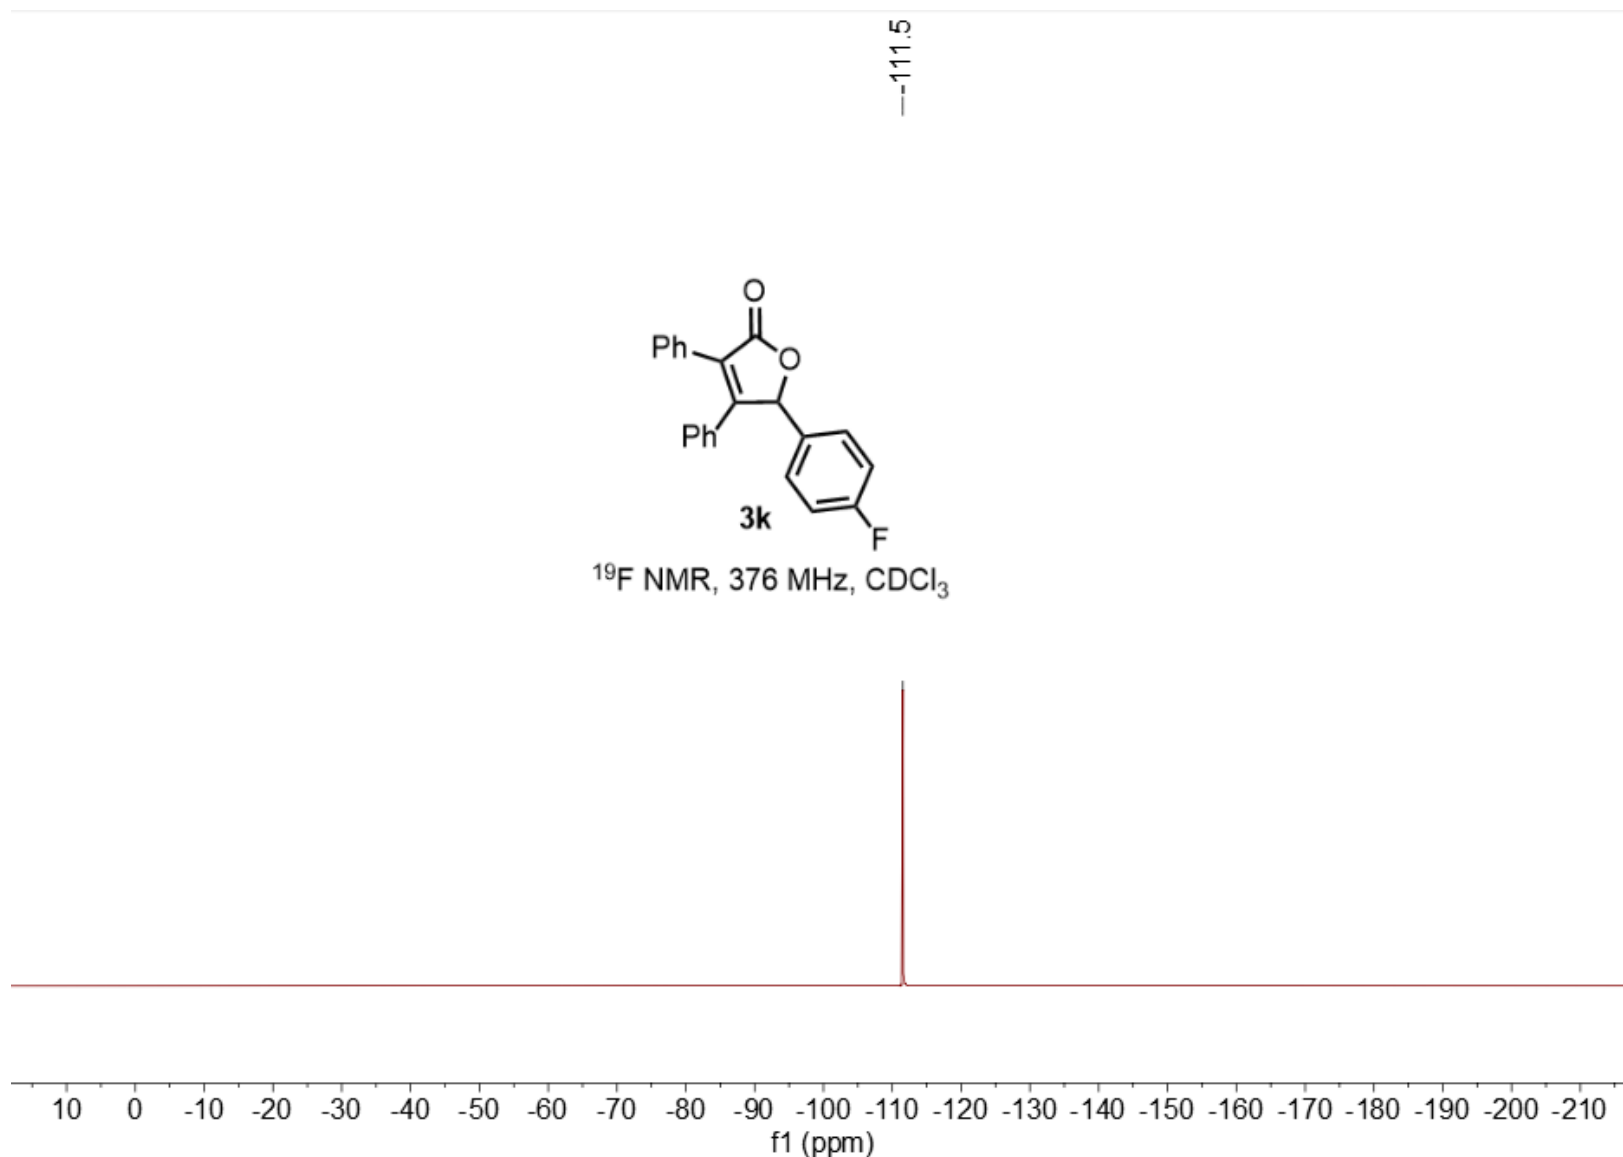

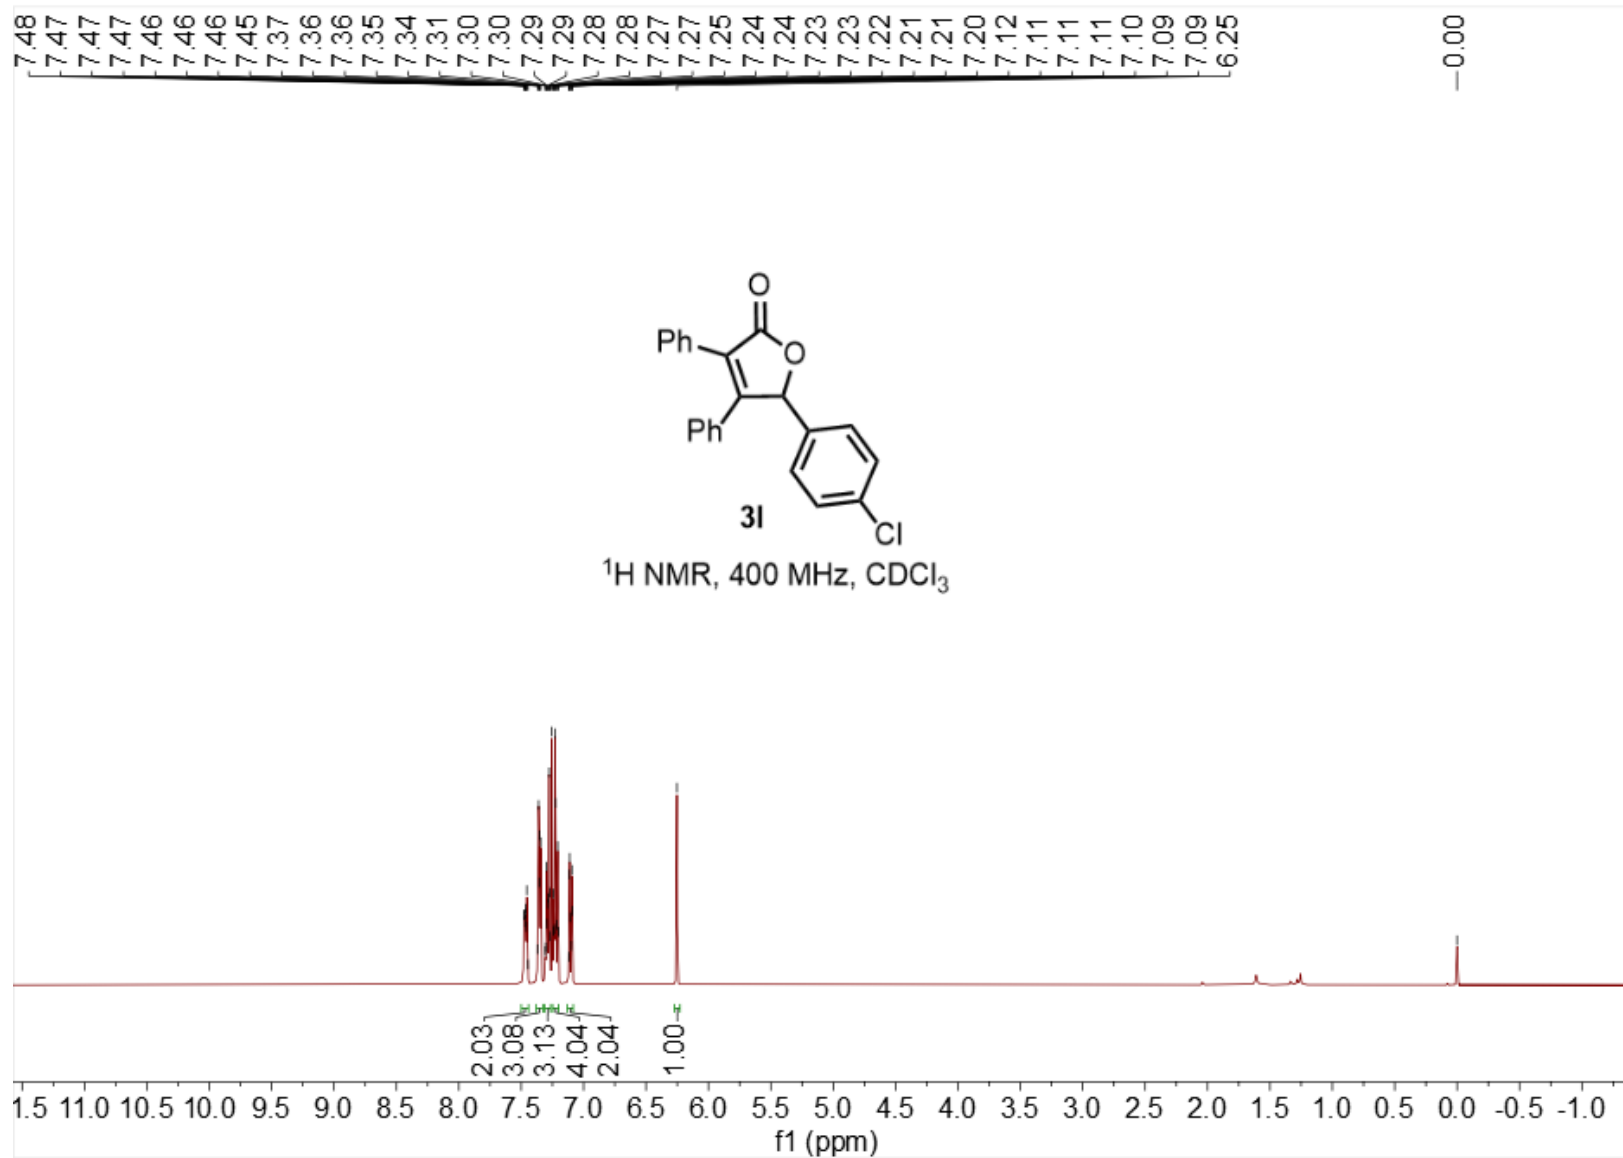

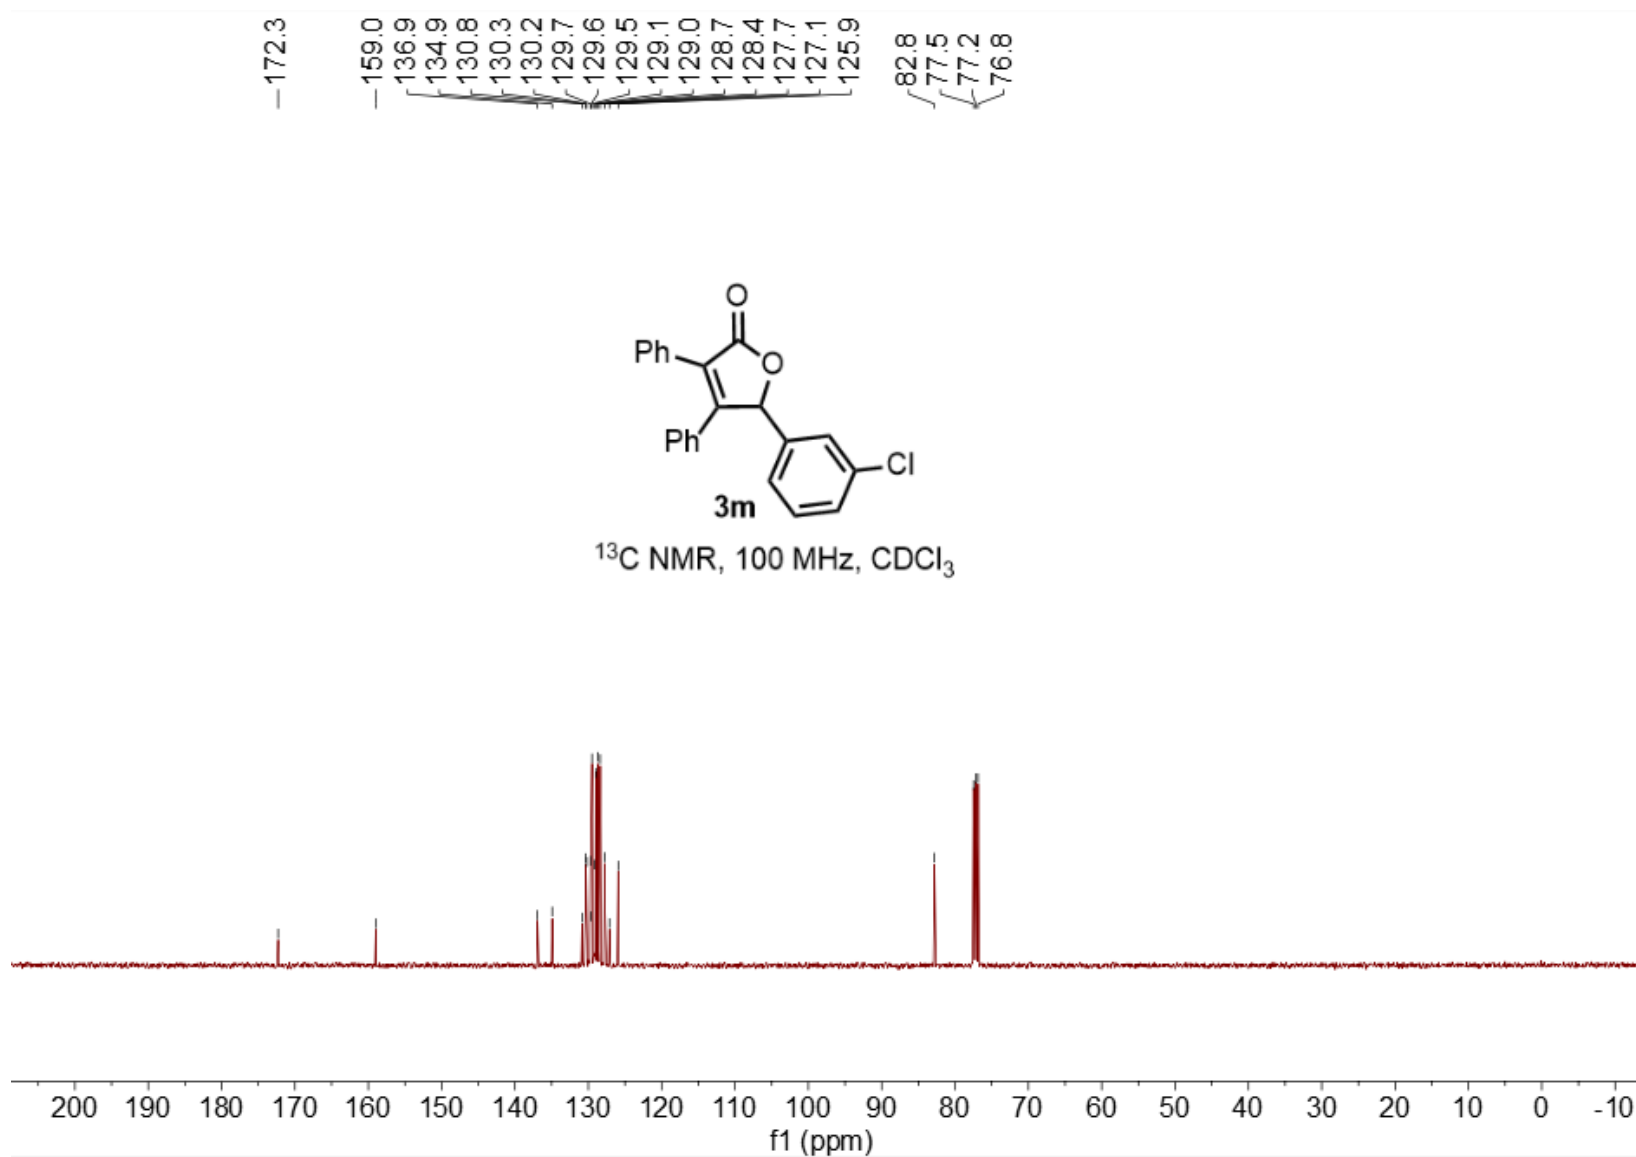

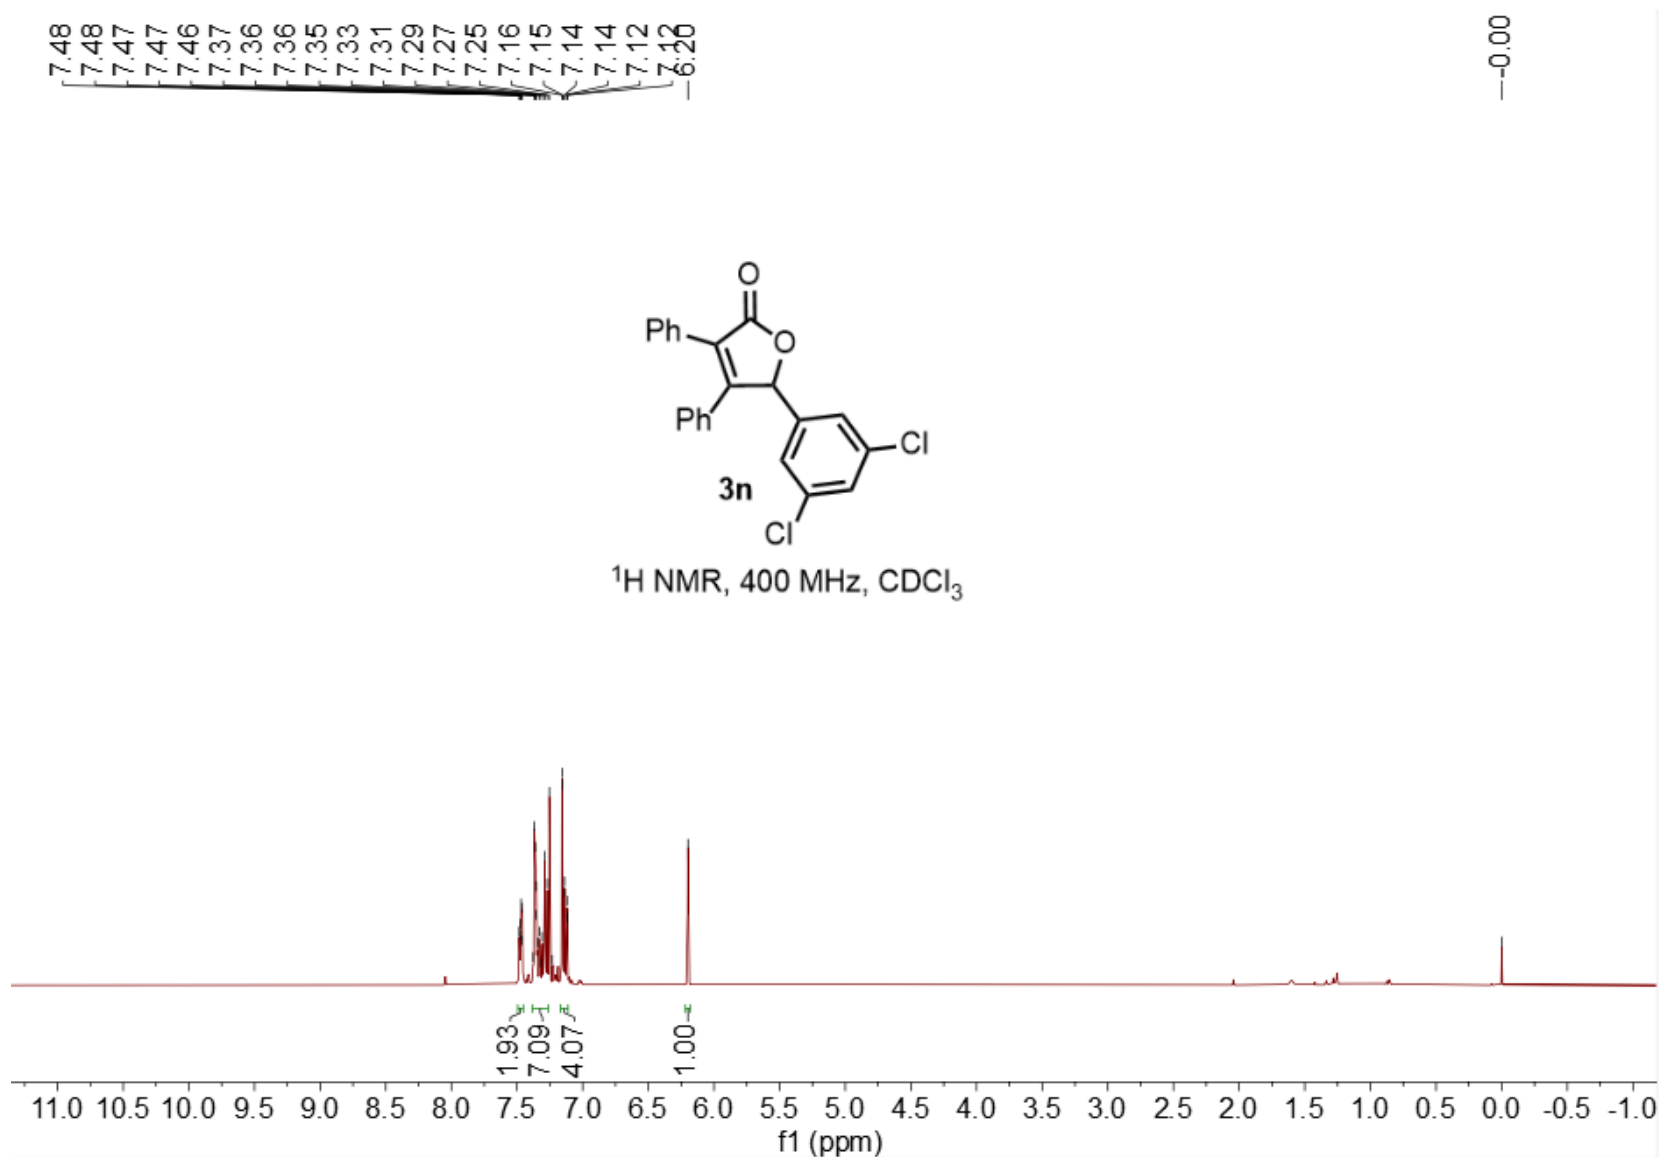

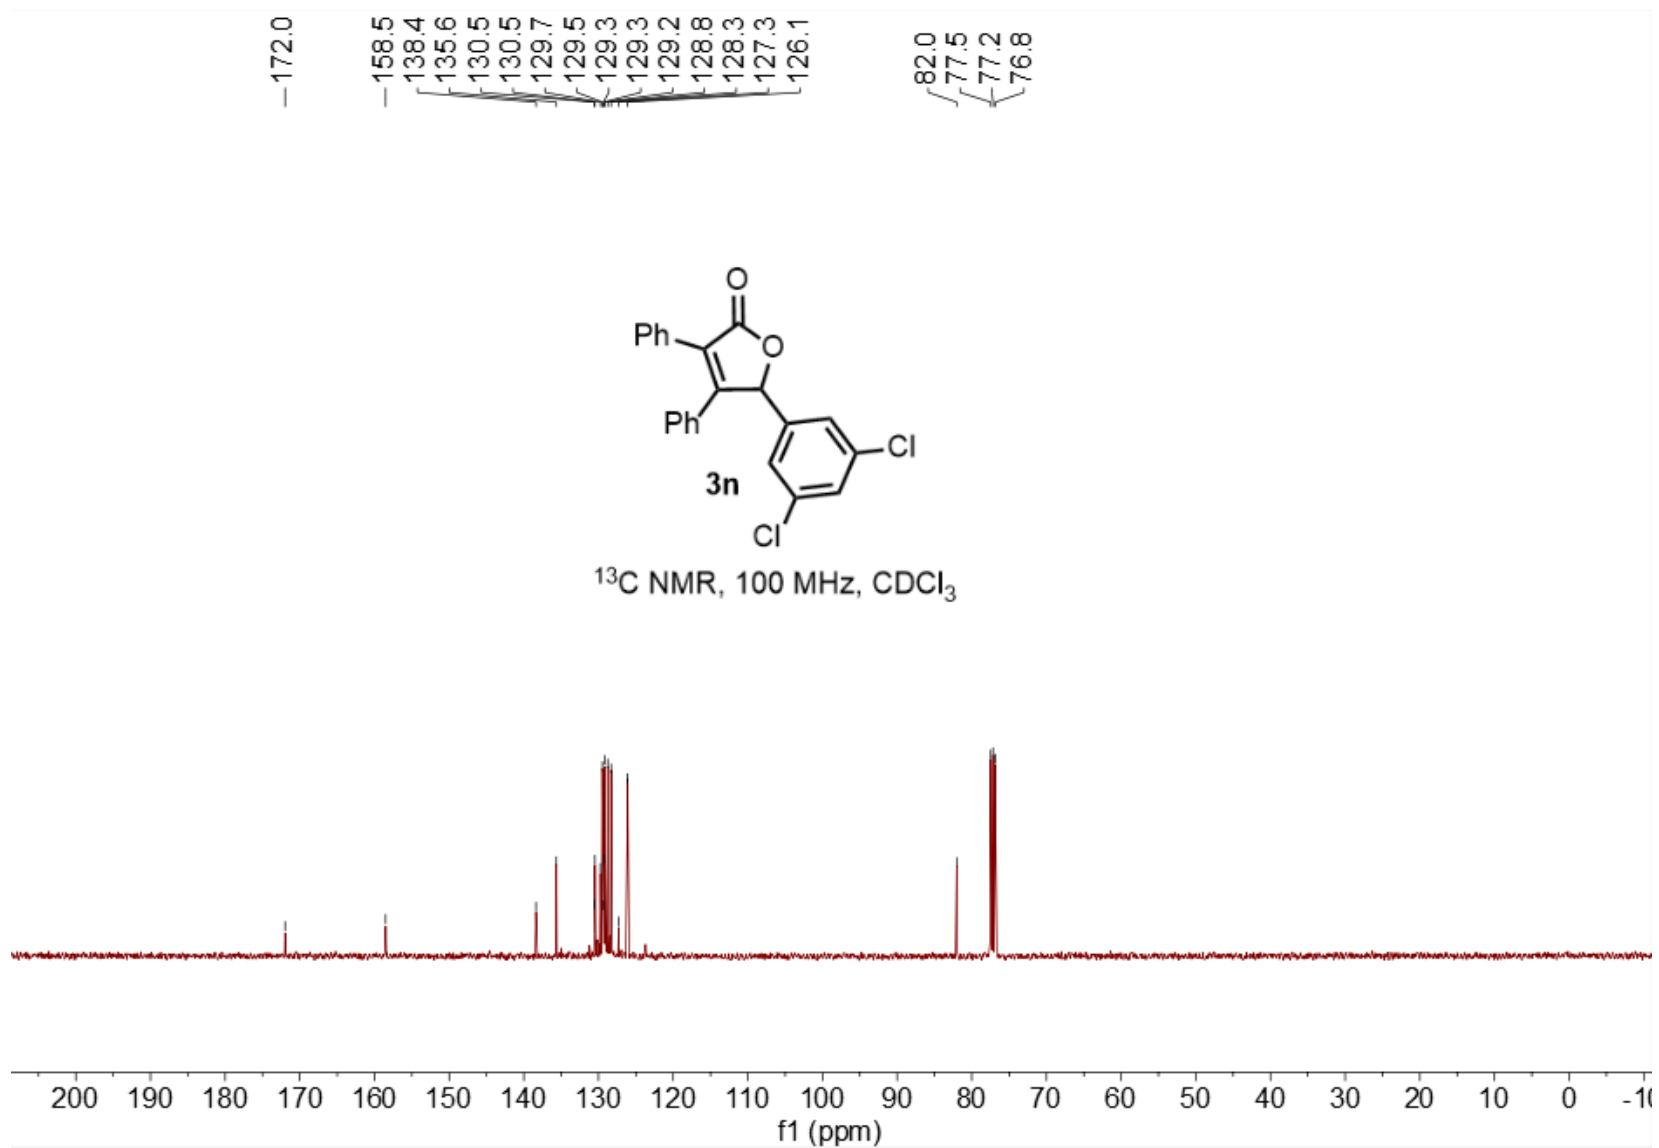

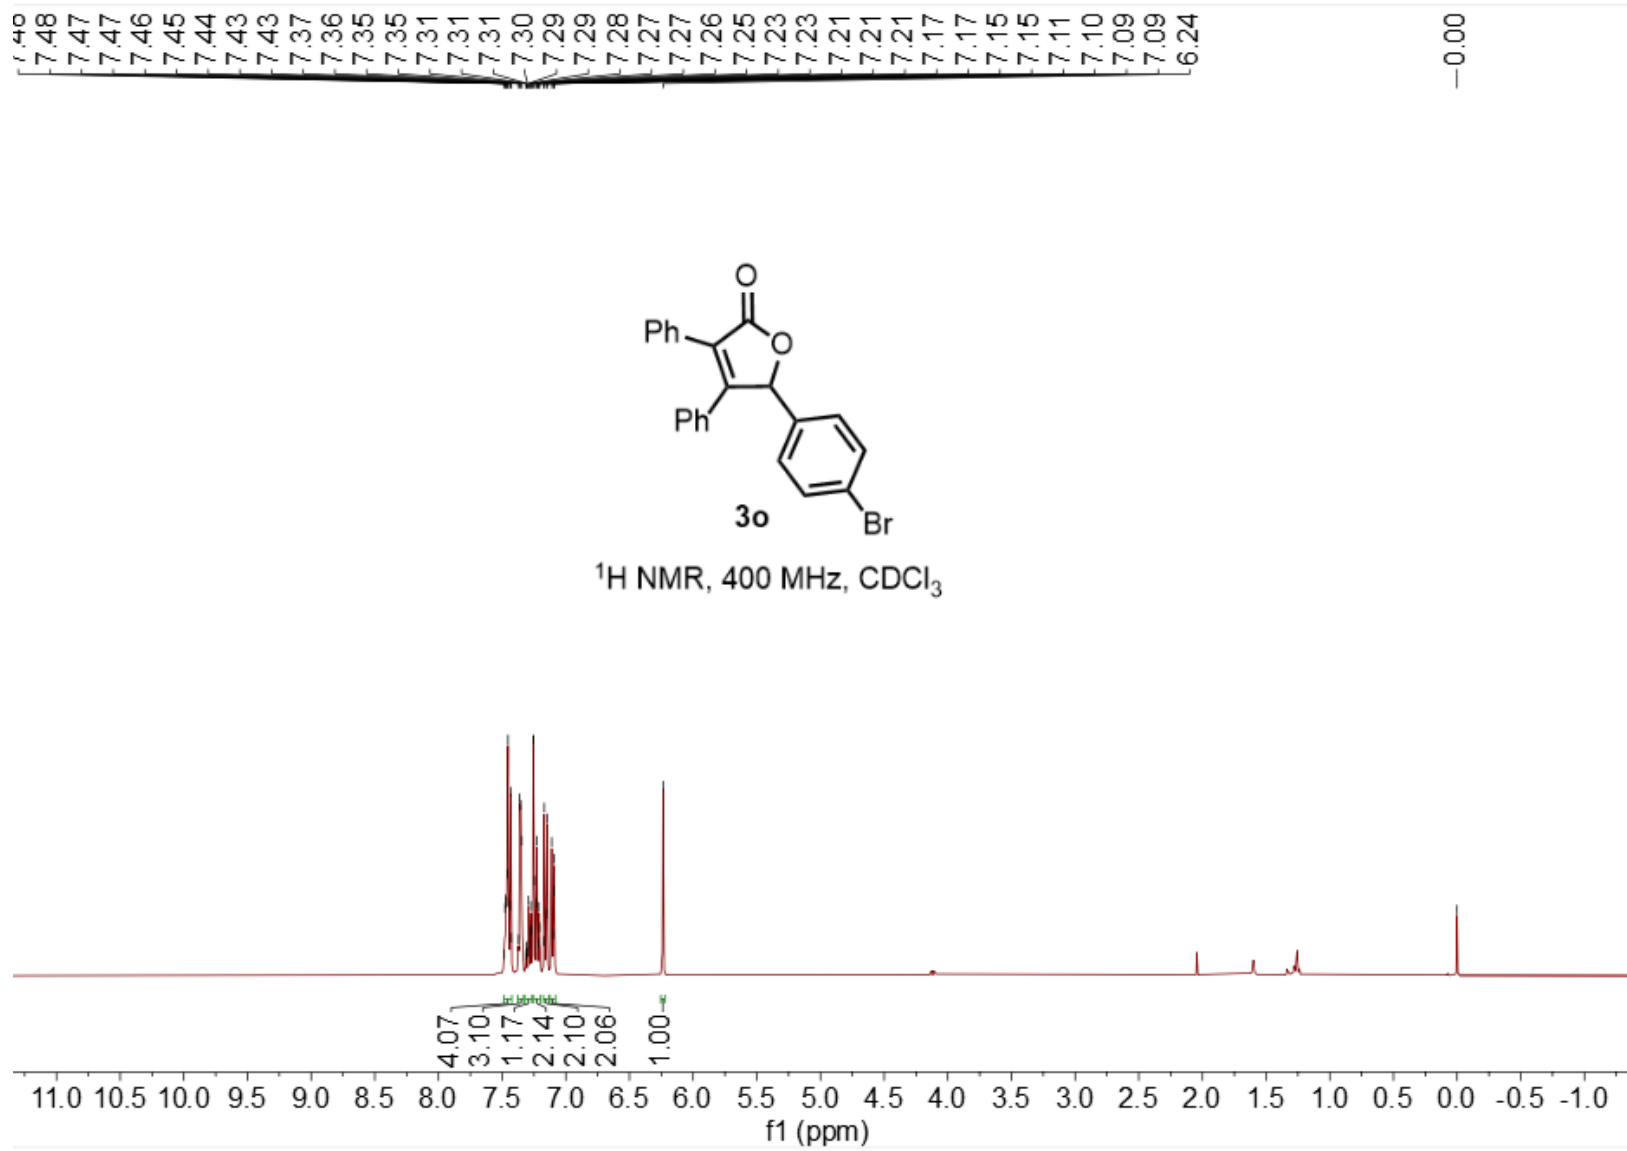



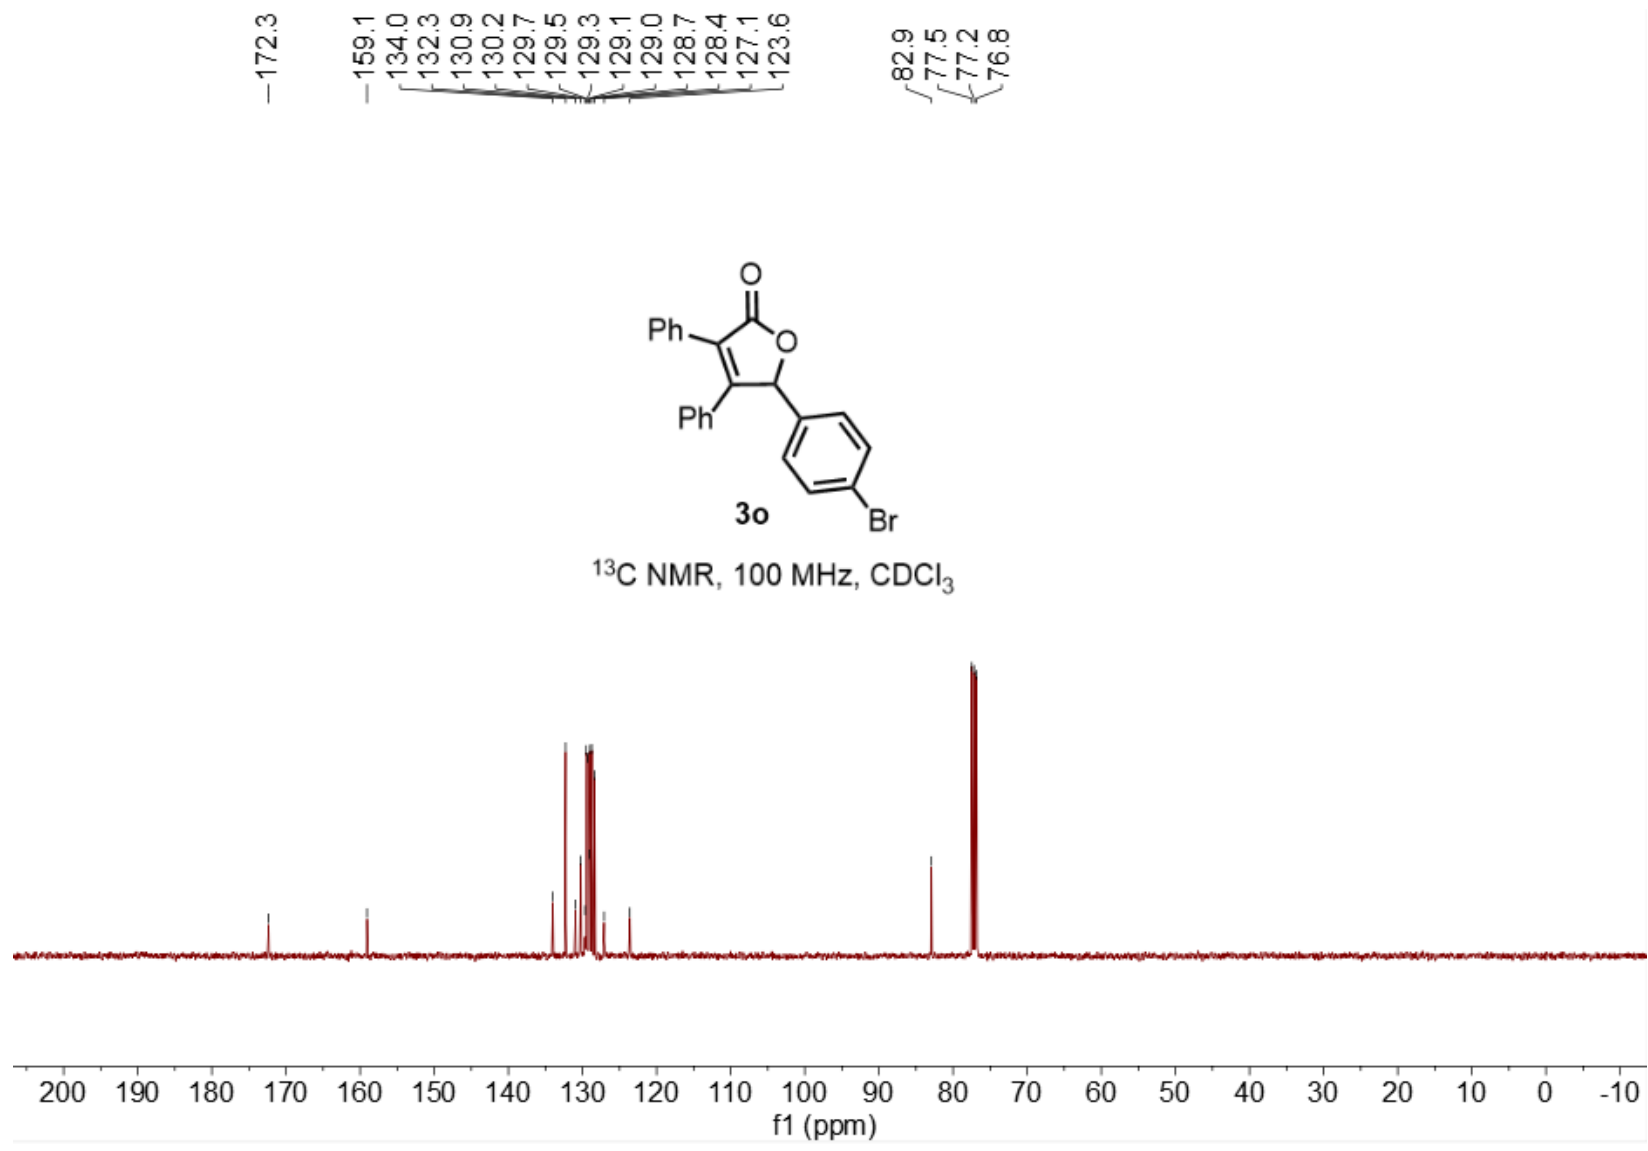

8.00  
7.99  
7.99  
7.98  
7.97  
7.97  
7.49  
7.48  
7.48  
7.48  
7.47  
7.47  
7.47  
7.46  
7.46  
7.37  
7.37  
7.36  
7.36  
7.36  
7.35  
7.35  
7.34  
7.30  
7.30  
7.30  
7.29  
7.28  
7.28  
7.27  
7.26  
7.26  
7.24  
7.24  
7.23  
7.22  
7.22  
7.21  
7.20  
7.20  
7.20  
7.11  
7.10  
7.10  
7.09  
7.09  
7.08  
7.08  
6.31  
3.89  
-0.00

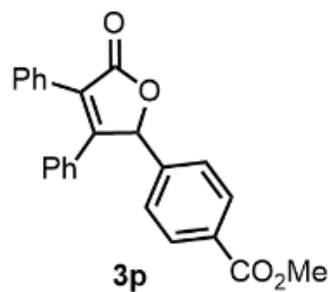

<sup>1</sup>H NMR, 400 MHz, CDCl<sub>3</sub>

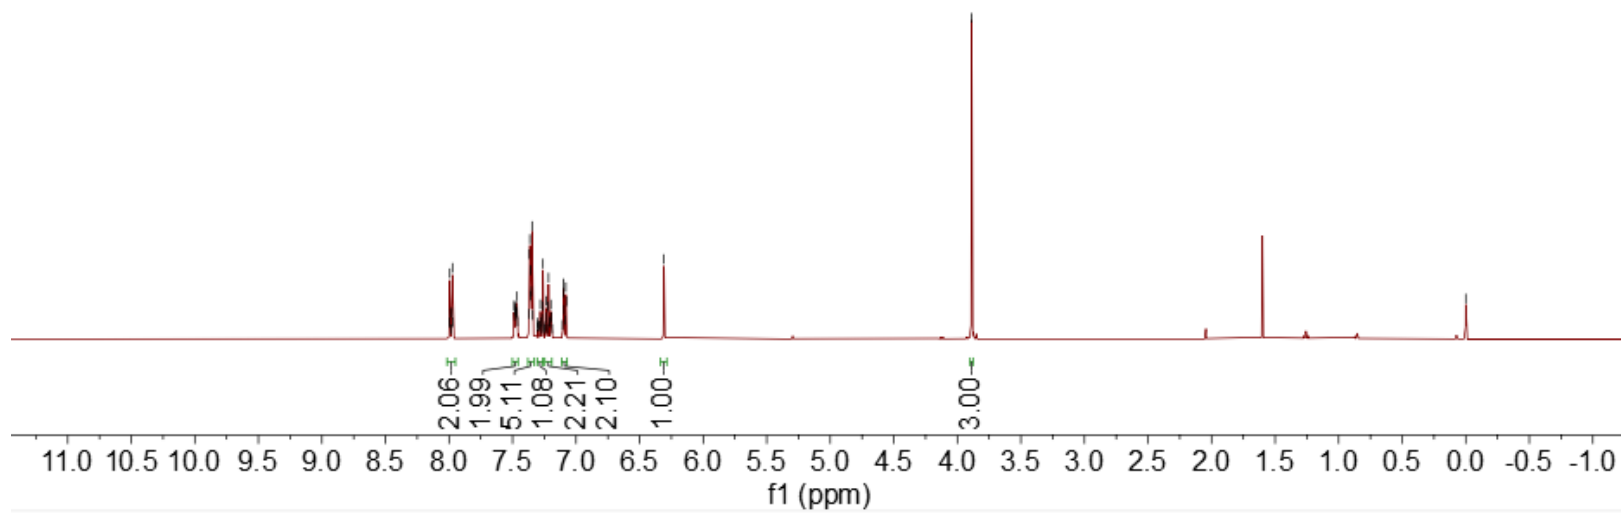

172.4  
166.5  
159.3

139.8  
131.2  
130.9  
130.3  
130.2  
129.6  
129.5  
129.2  
129.0  
128.7  
128.3  
127.6  
127.0  
83.0  
77.5  
77.2  
76.8

52.4

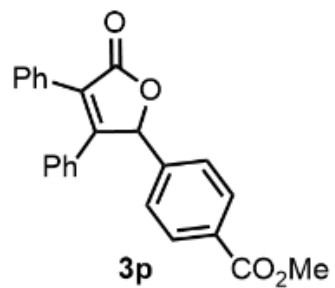

<sup>13</sup>C NMR, 100 MHz, CDCl<sub>3</sub>

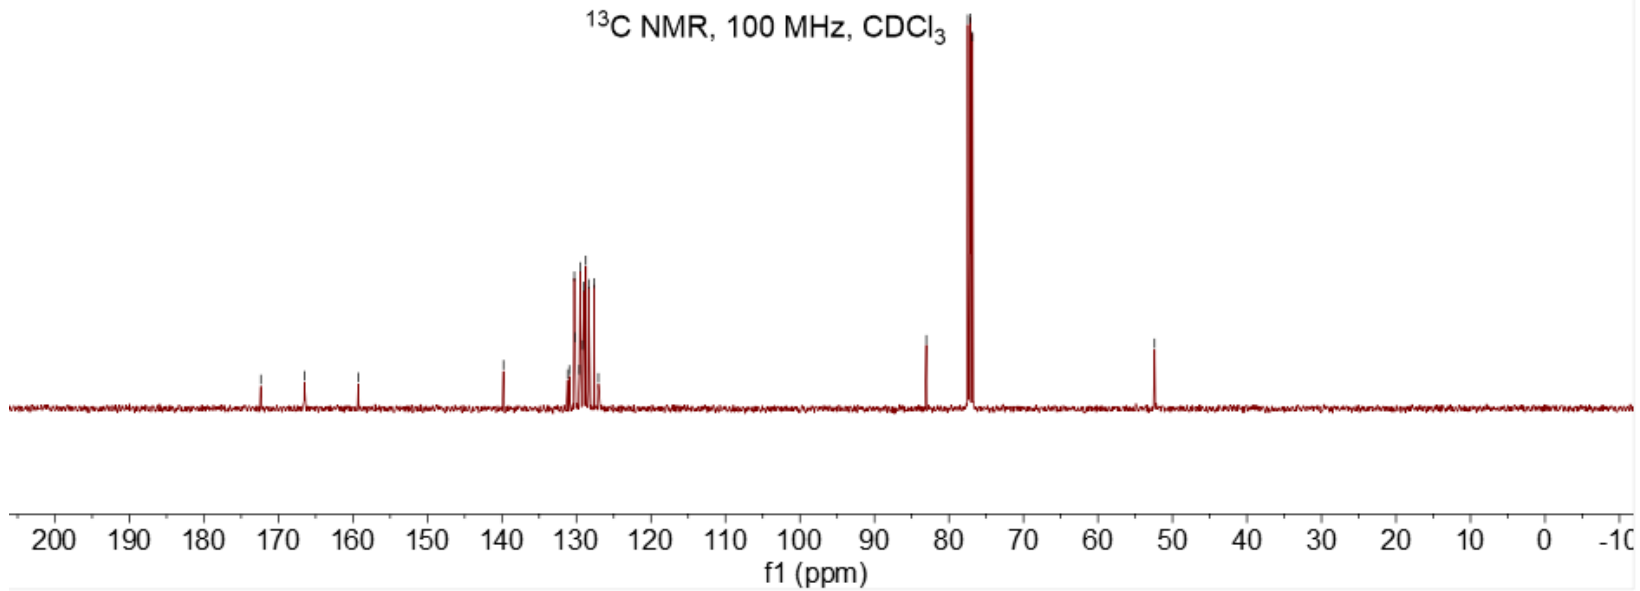

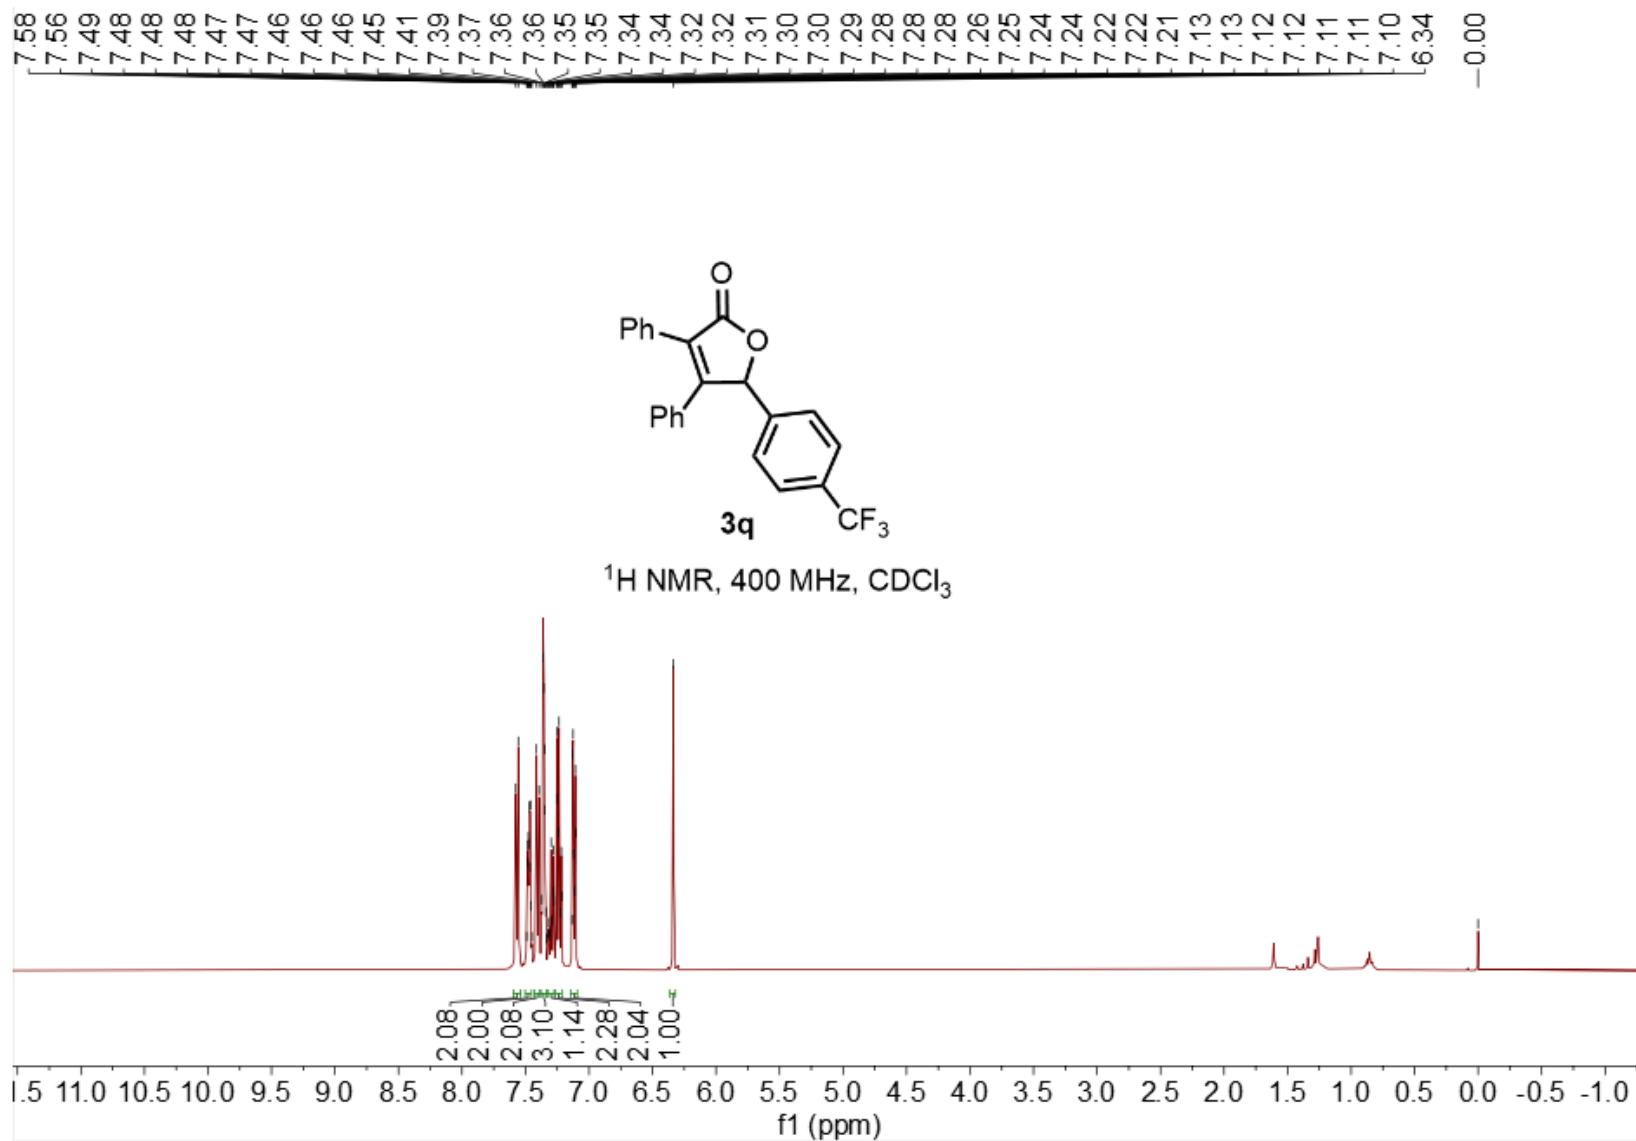

8.17  
8.17  
8.17  
8.15  
8.15  
8.14  
7.63  
7.62  
7.61  
7.53  
7.52  
7.51  
7.51  
7.50  
7.49  
7.49  
7.48  
7.48  
7.48  
7.48  
7.47  
7.38  
7.38  
7.37  
7.37  
7.36  
7.36  
7.36  
7.32  
7.31  
7.29  
7.29  
7.28  
7.27  
7.26  
7.26  
7.25  
7.25  
7.25  
7.24  
7.23  
7.23  
7.16  
7.15  
7.15  
7.14  
7.14  
7.13  
6.40  
-0.00

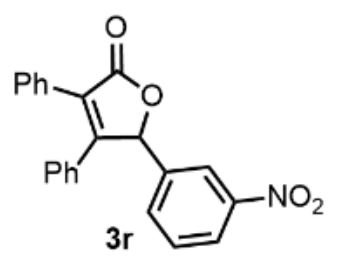

<sup>1</sup>H NMR, 400 MHz, CDCl<sub>3</sub>

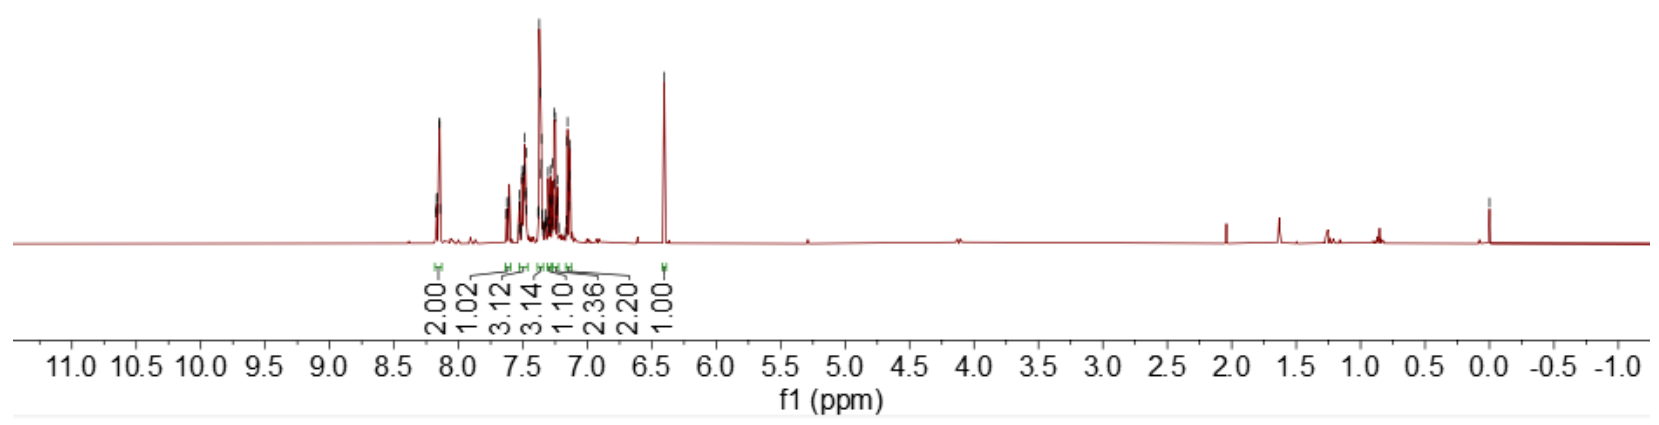

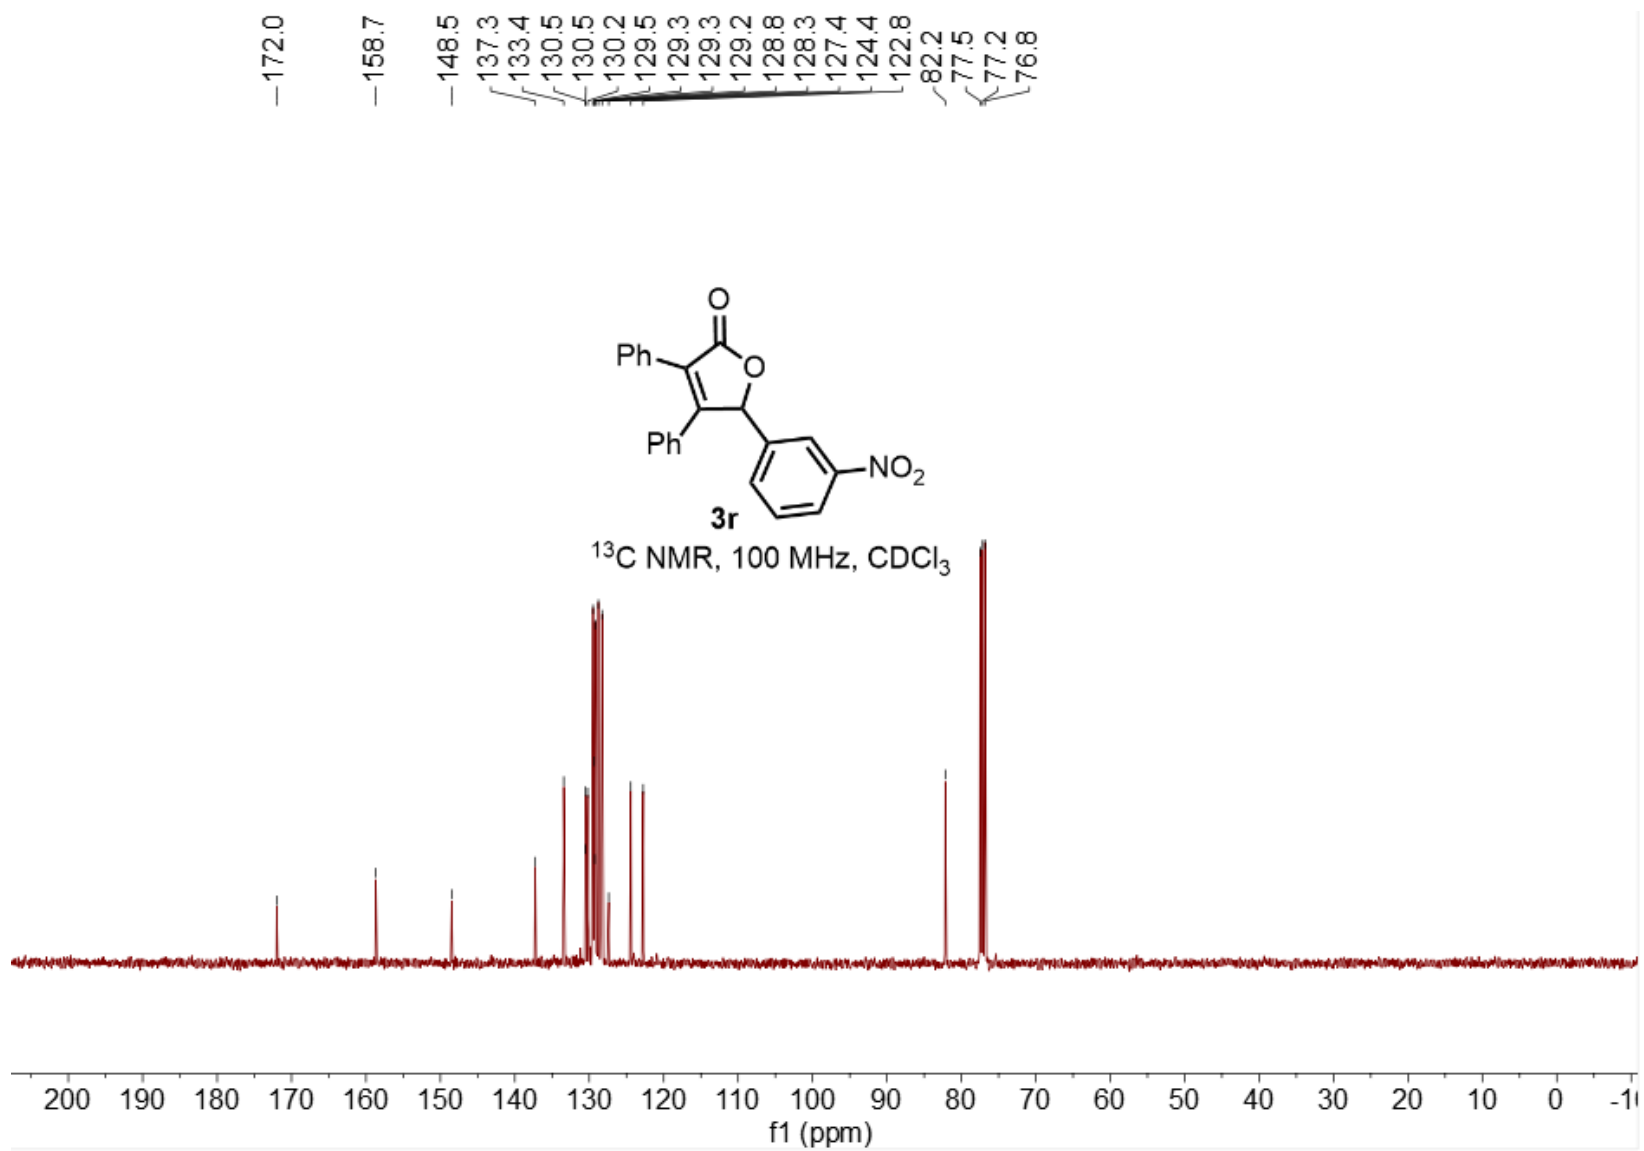

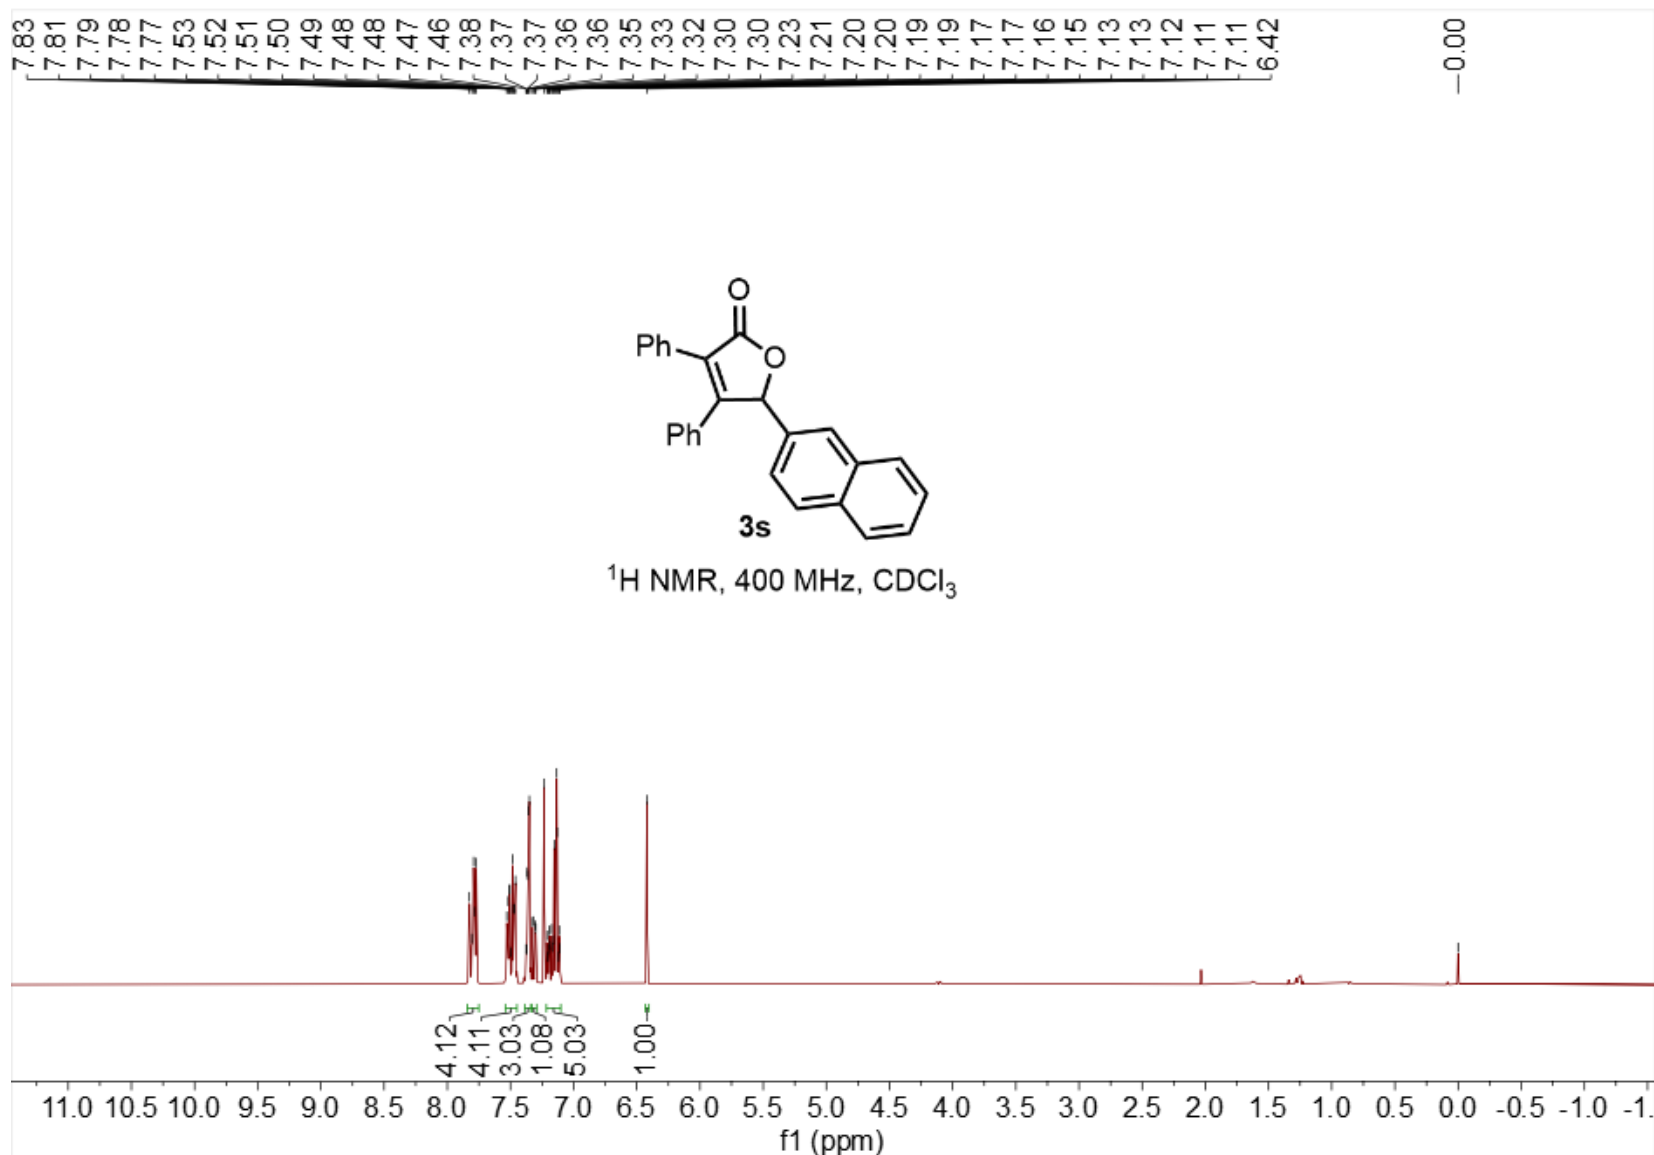

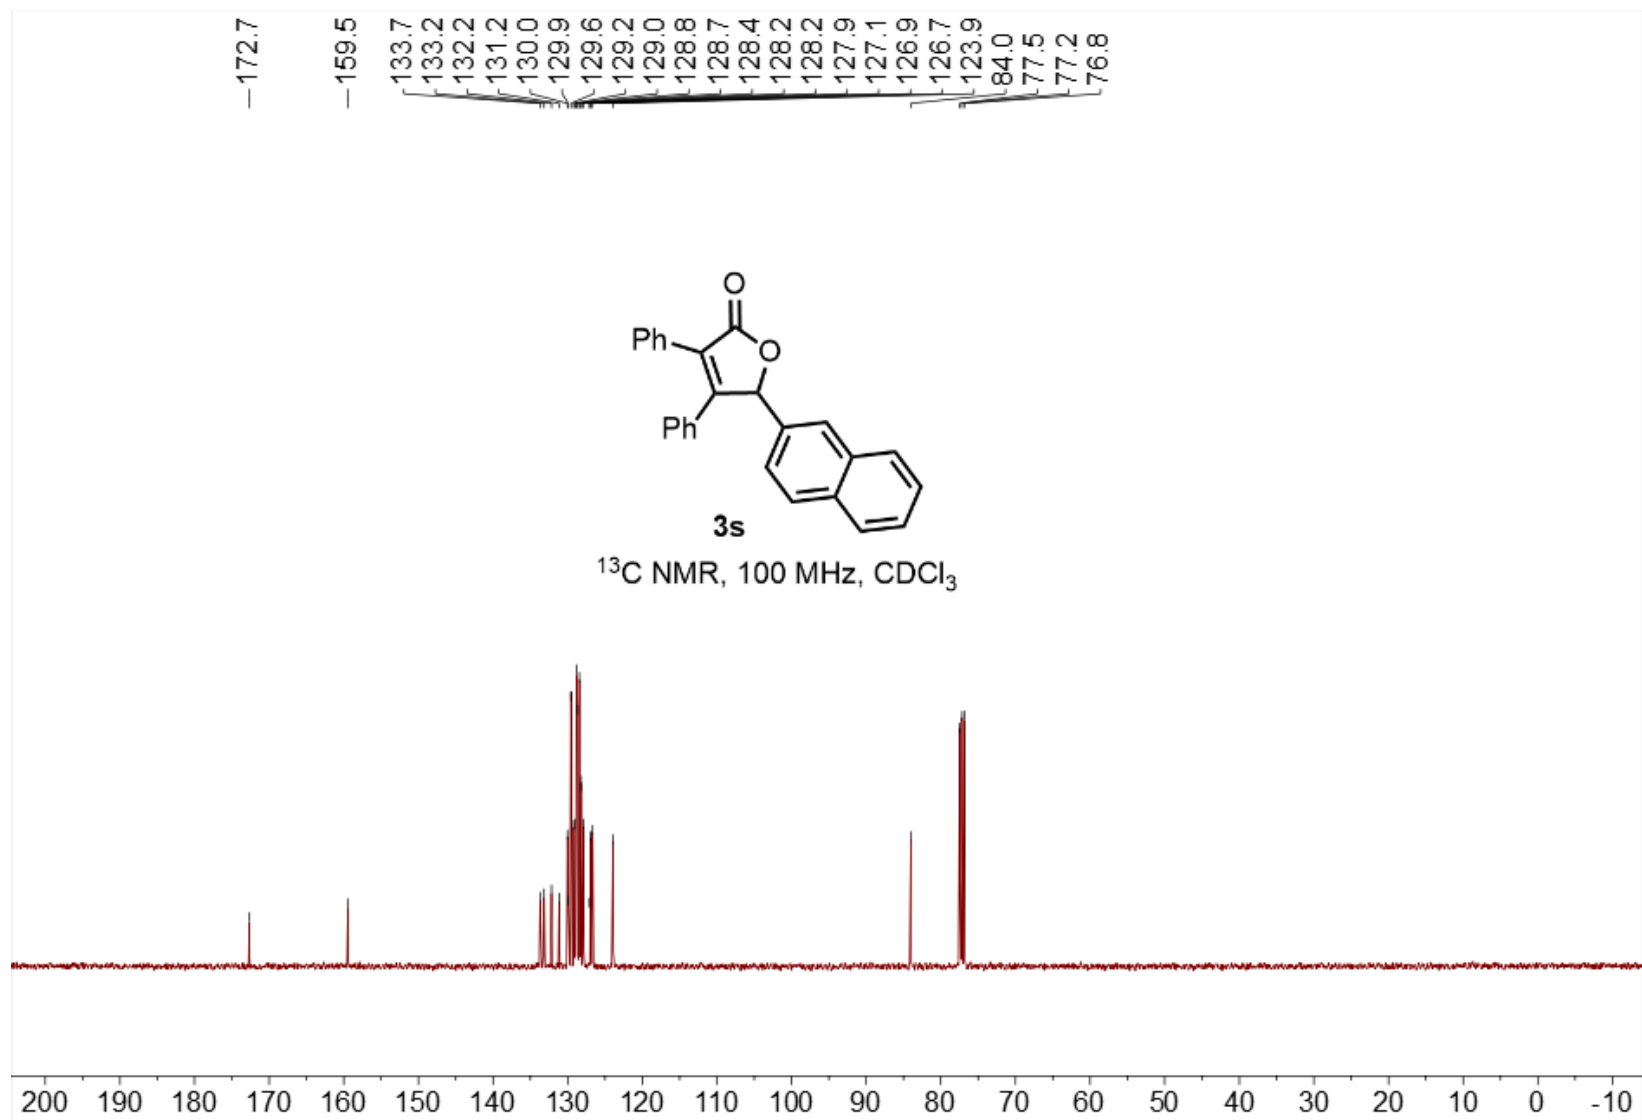



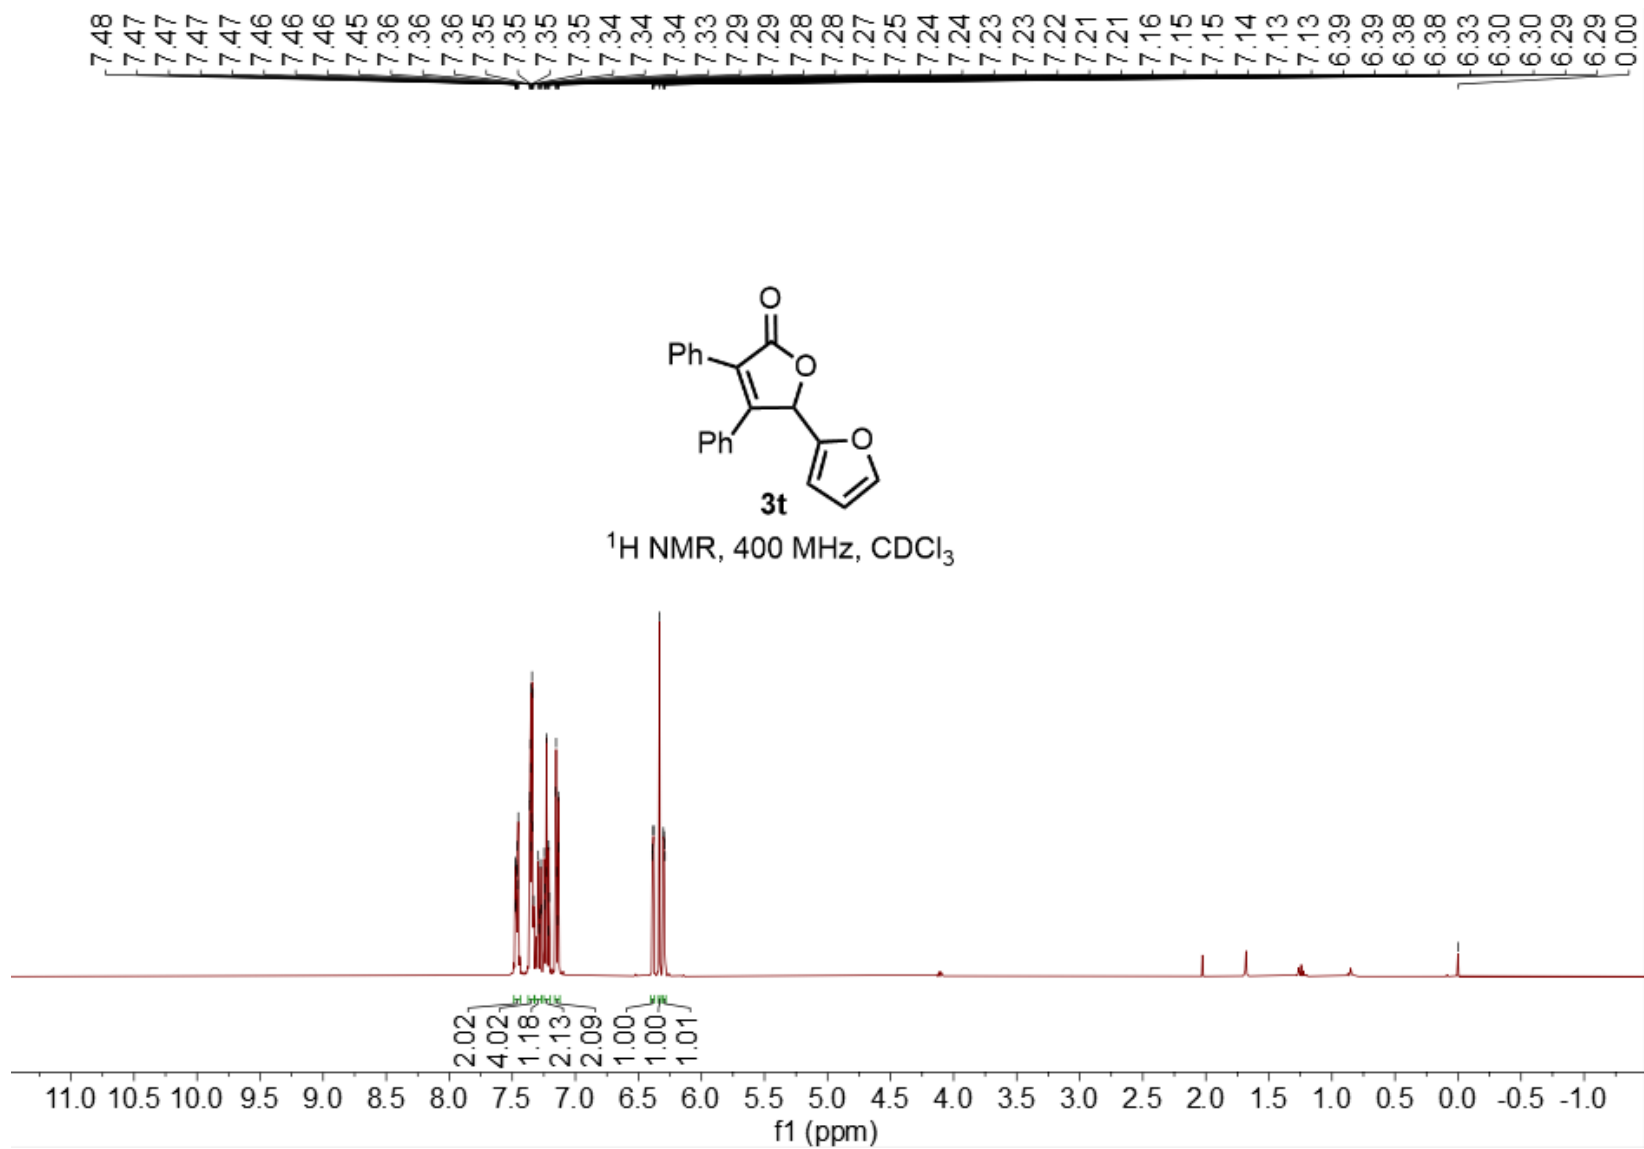

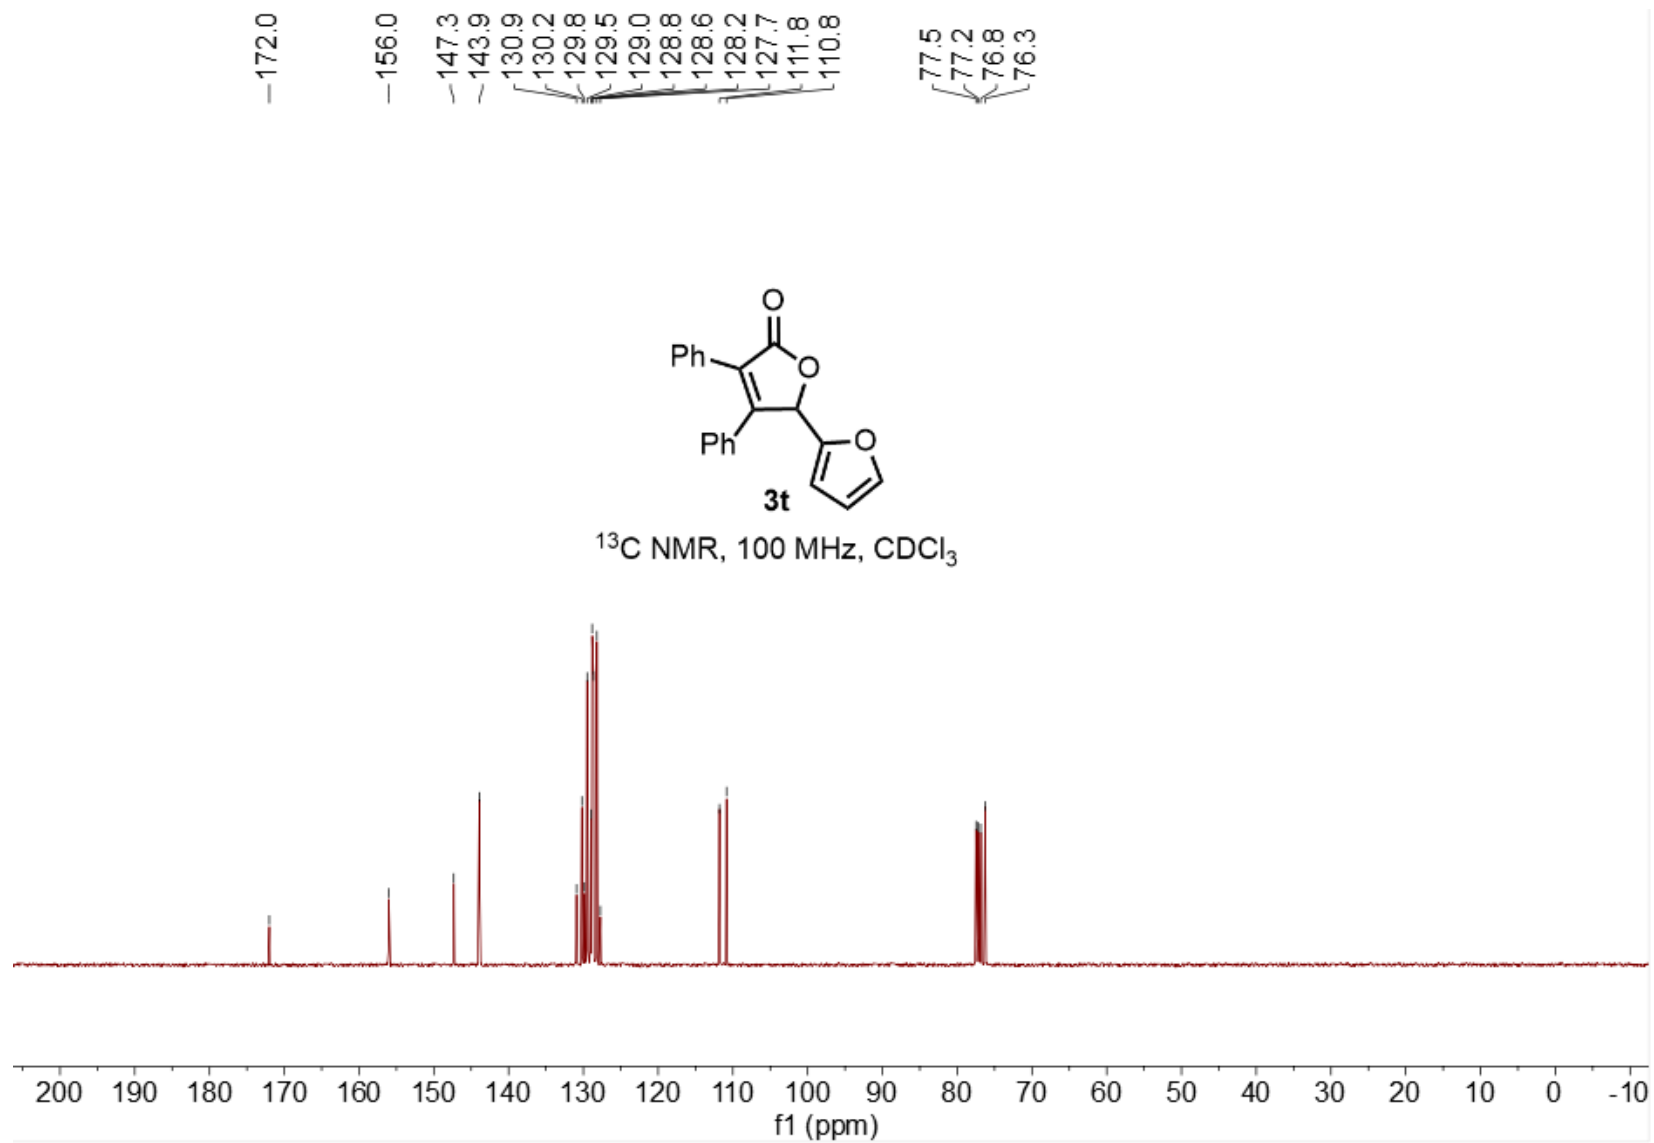

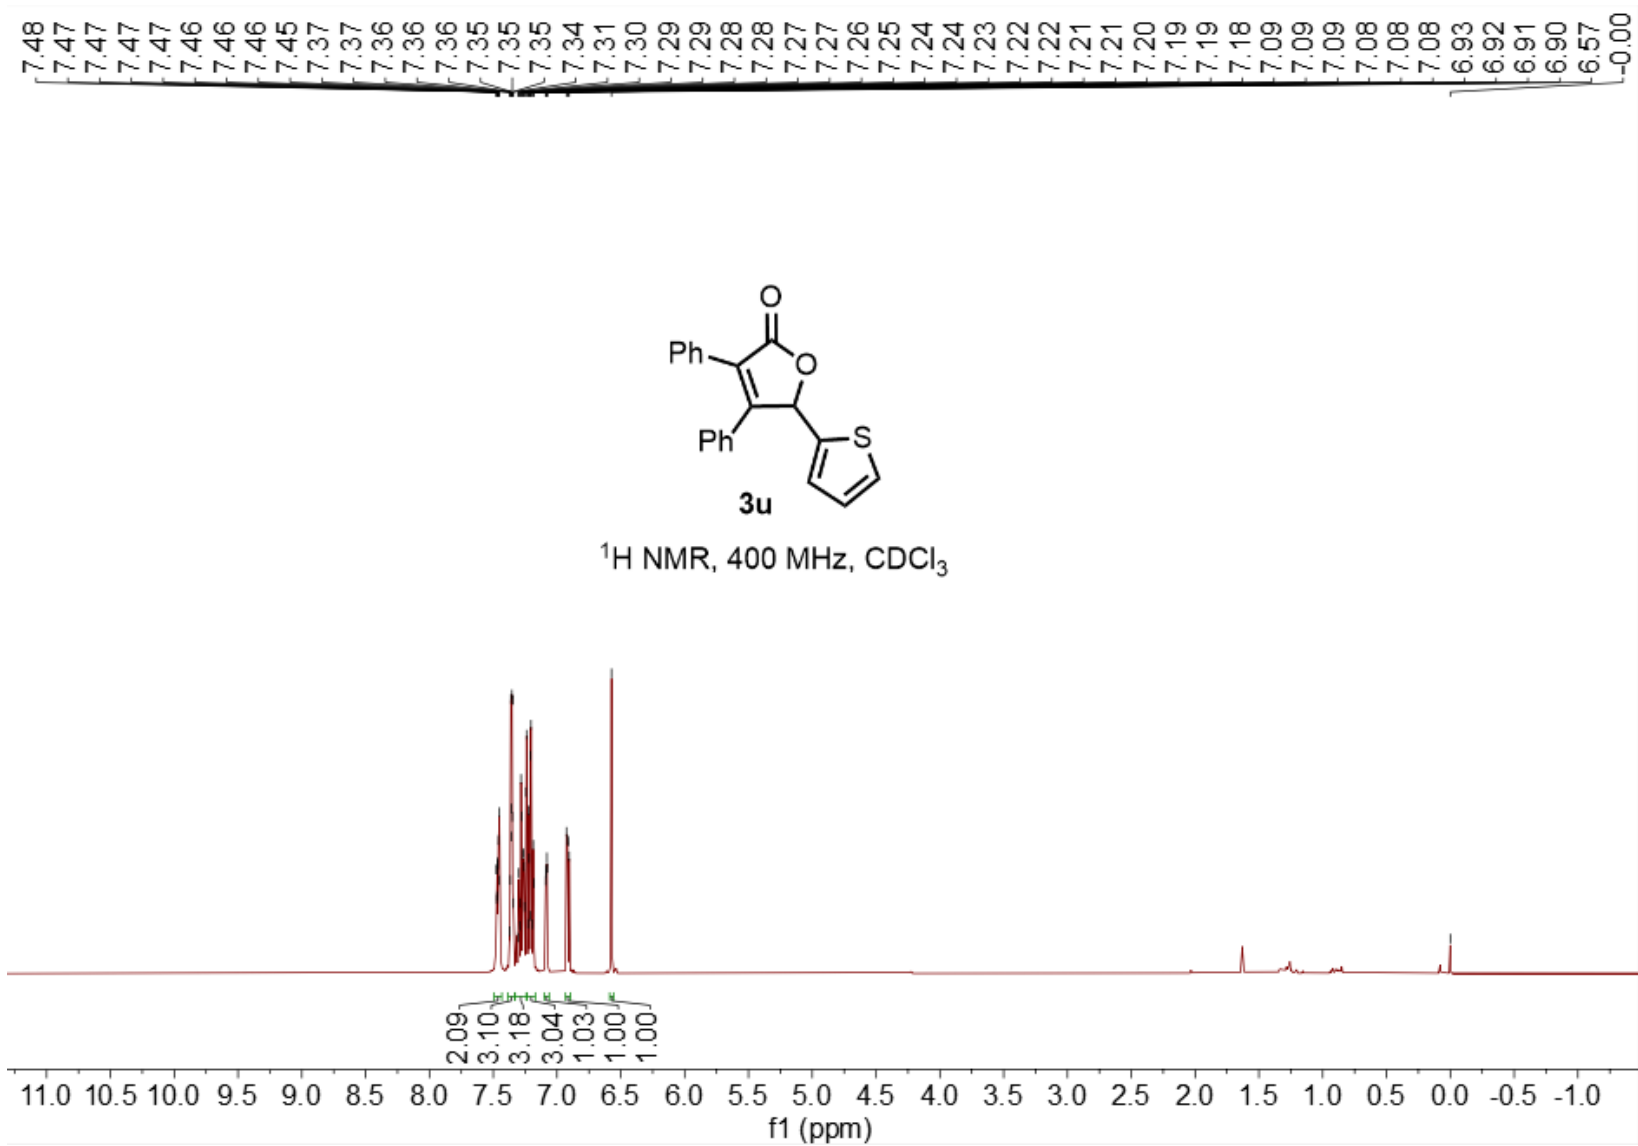

171.8  
158.3  
137.8  
131.0  
130.3  
129.8  
129.5  
129.1  
128.9  
128.7  
128.5  
128.5  
127.5  
127.1  
127.1  
78.5  
77.5  
77.2  
76.8

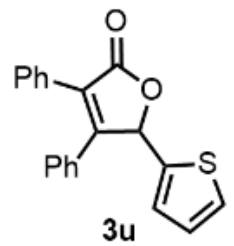

<sup>13</sup>C NMR, 100 MHz, CDCl<sub>3</sub>

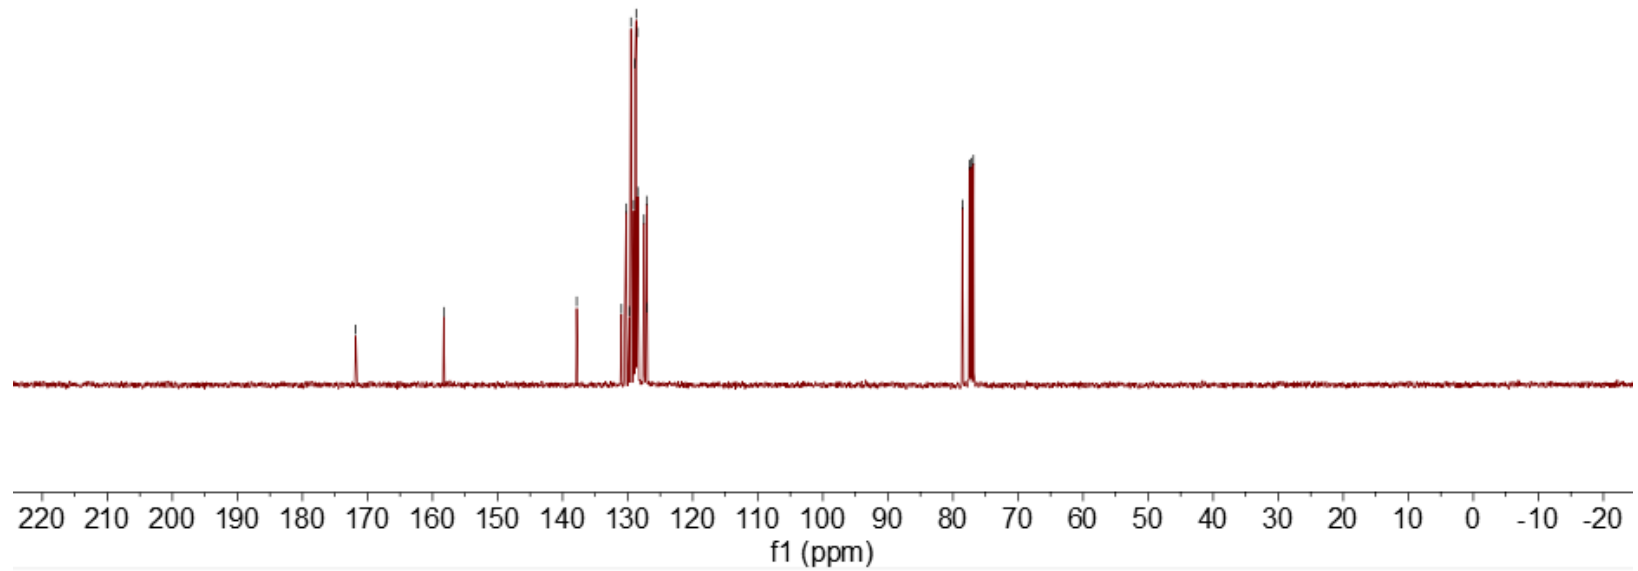

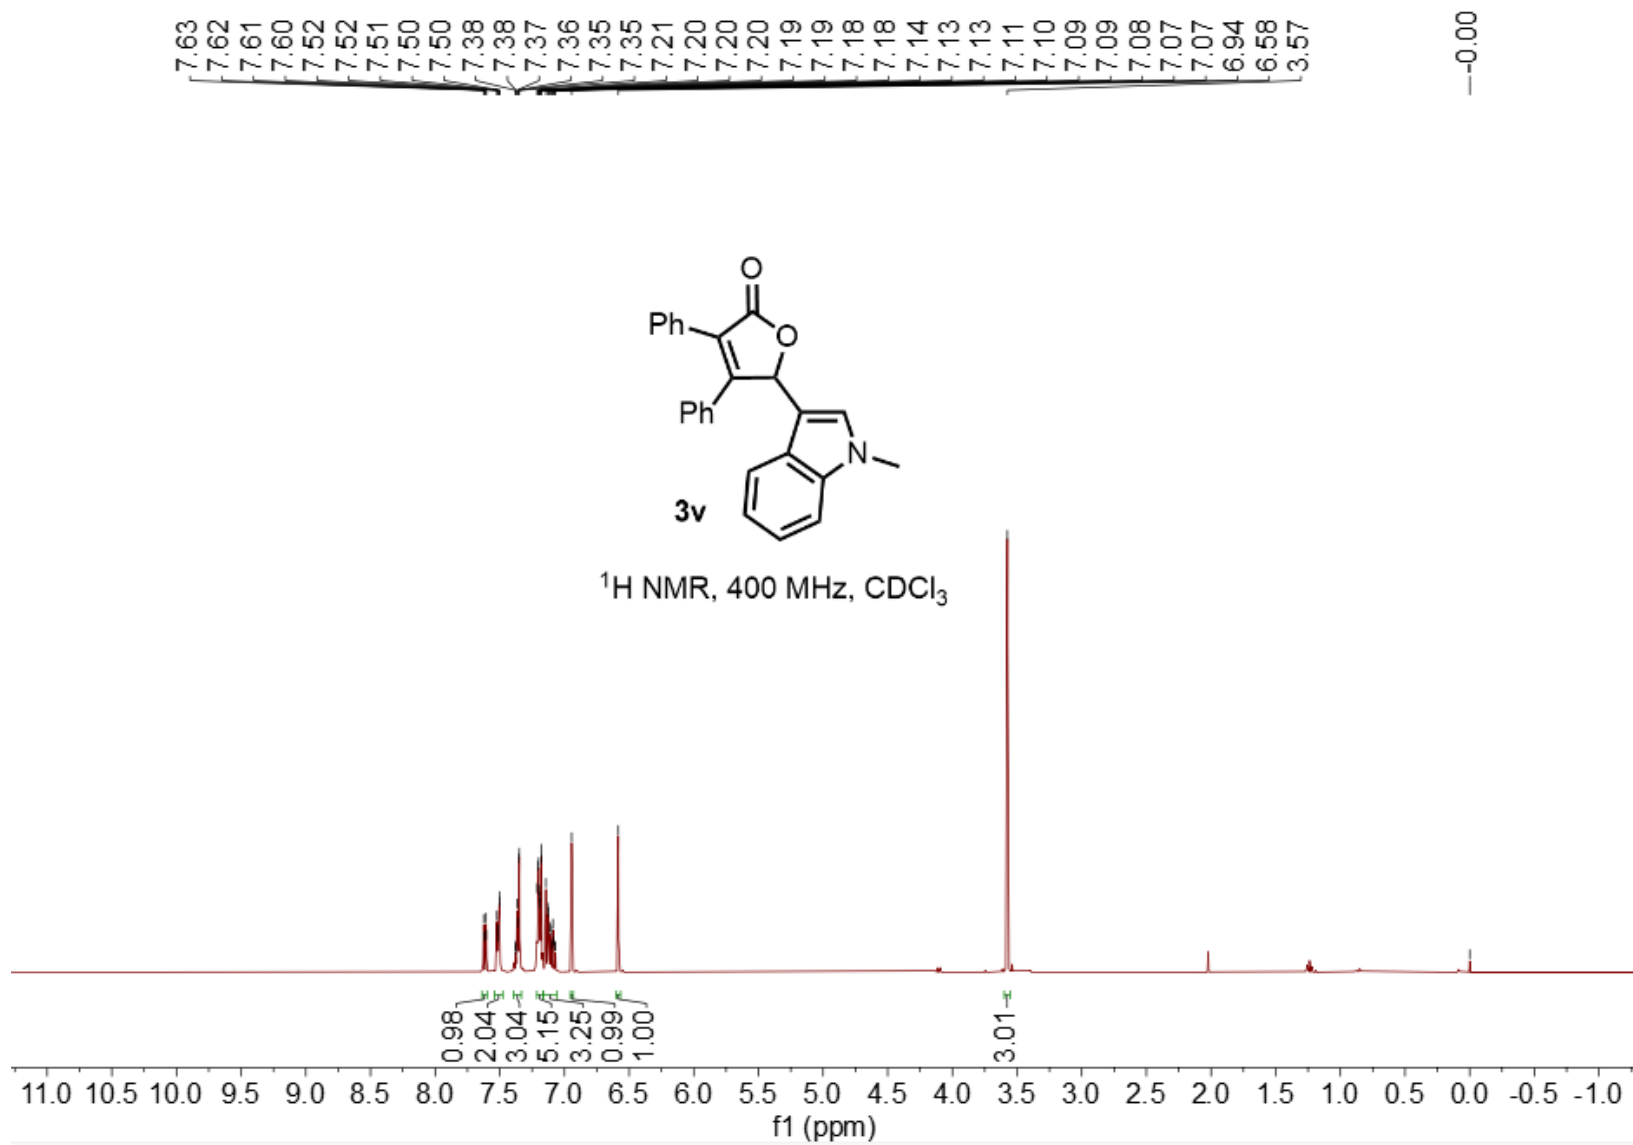

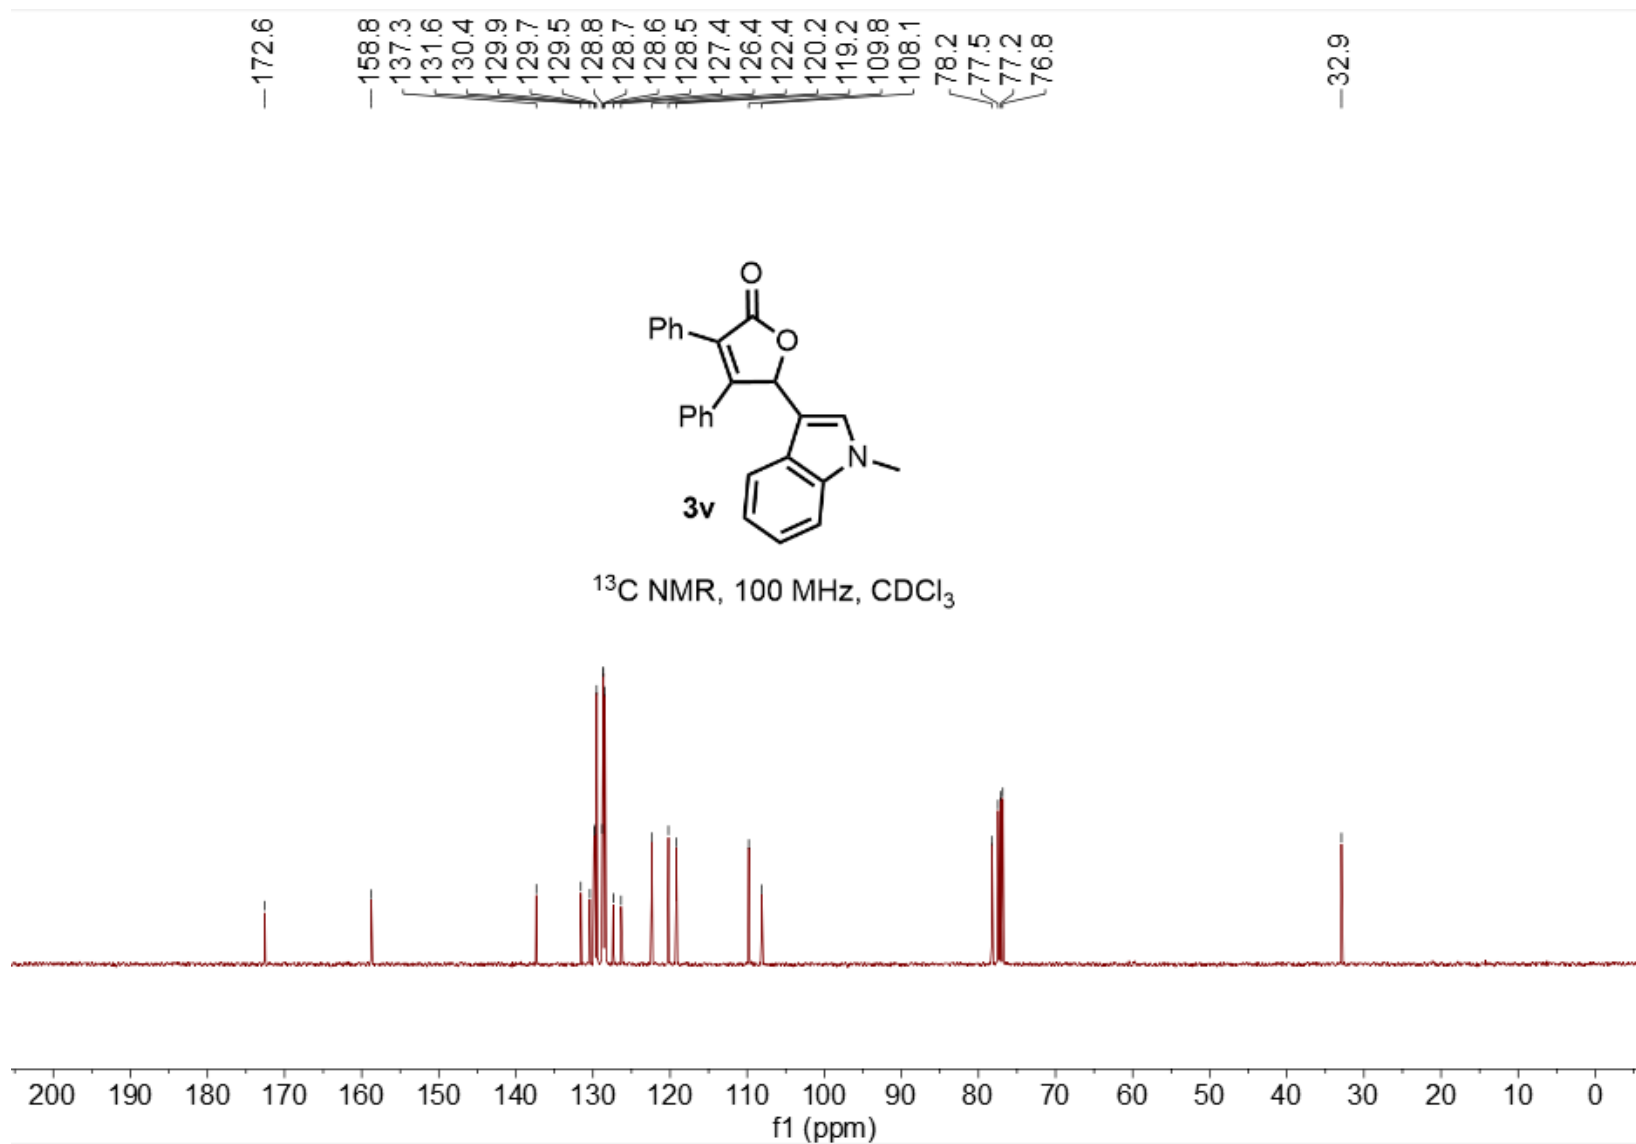

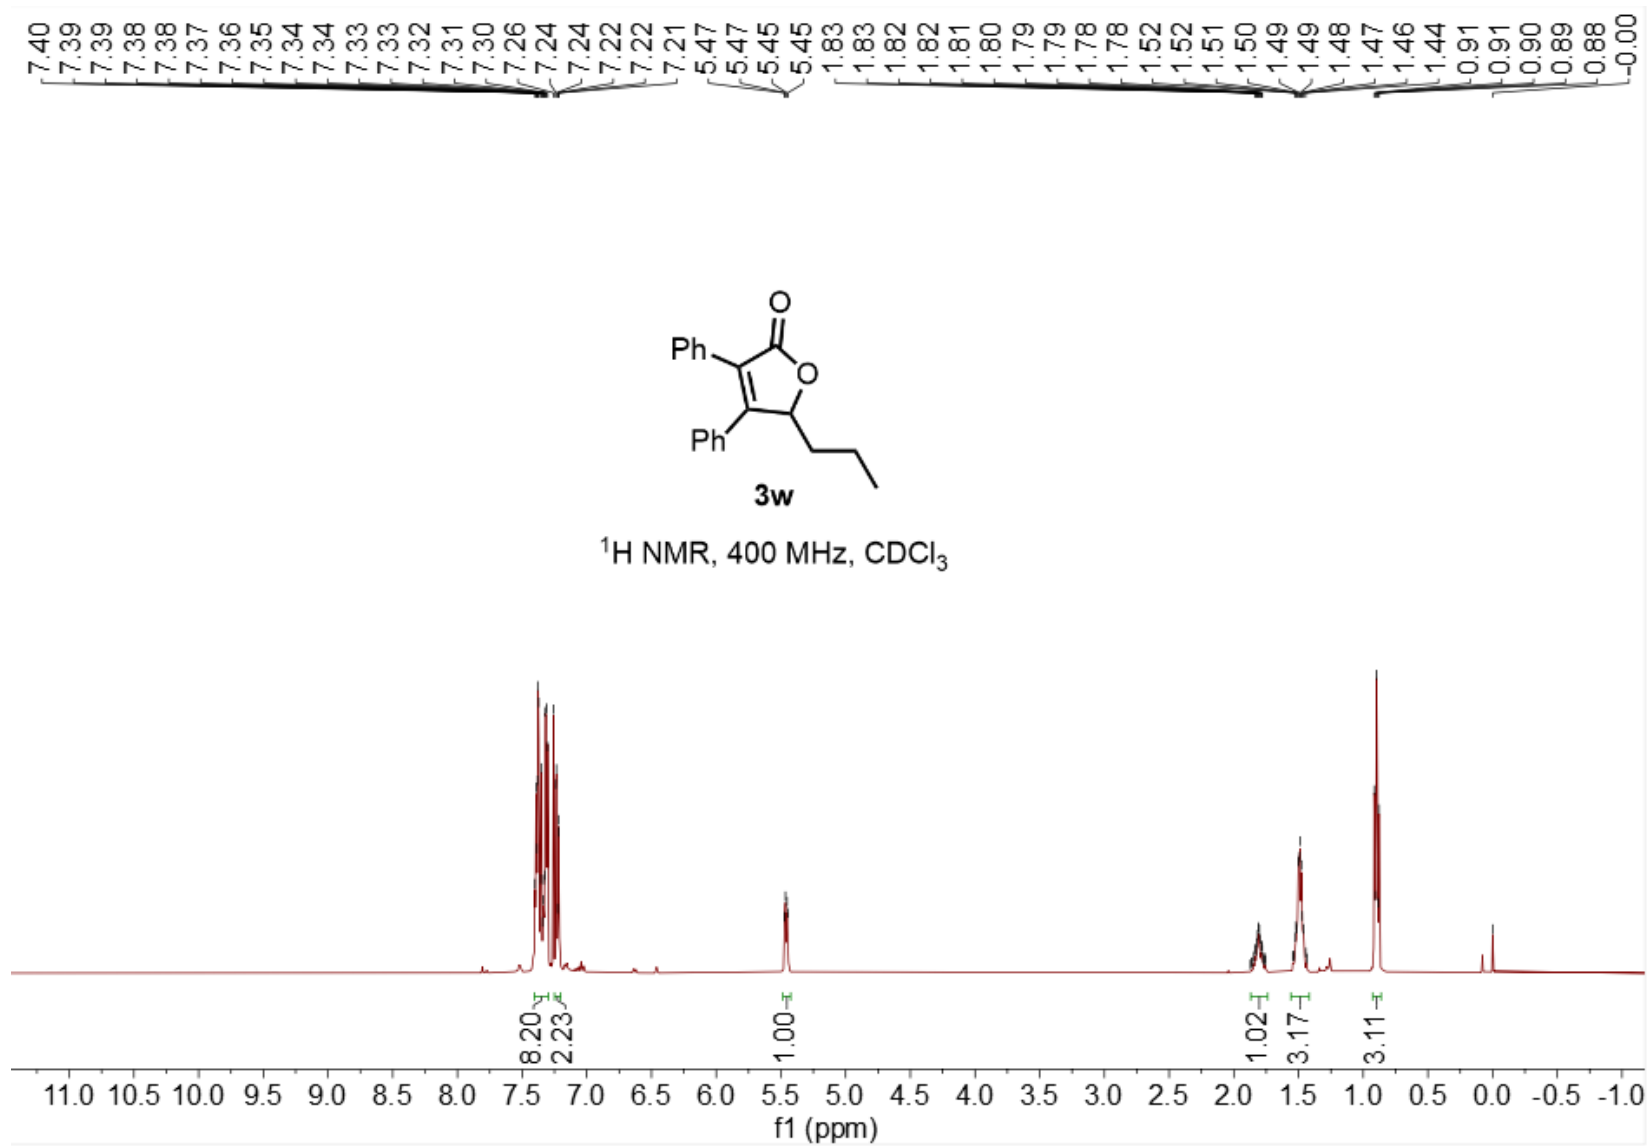

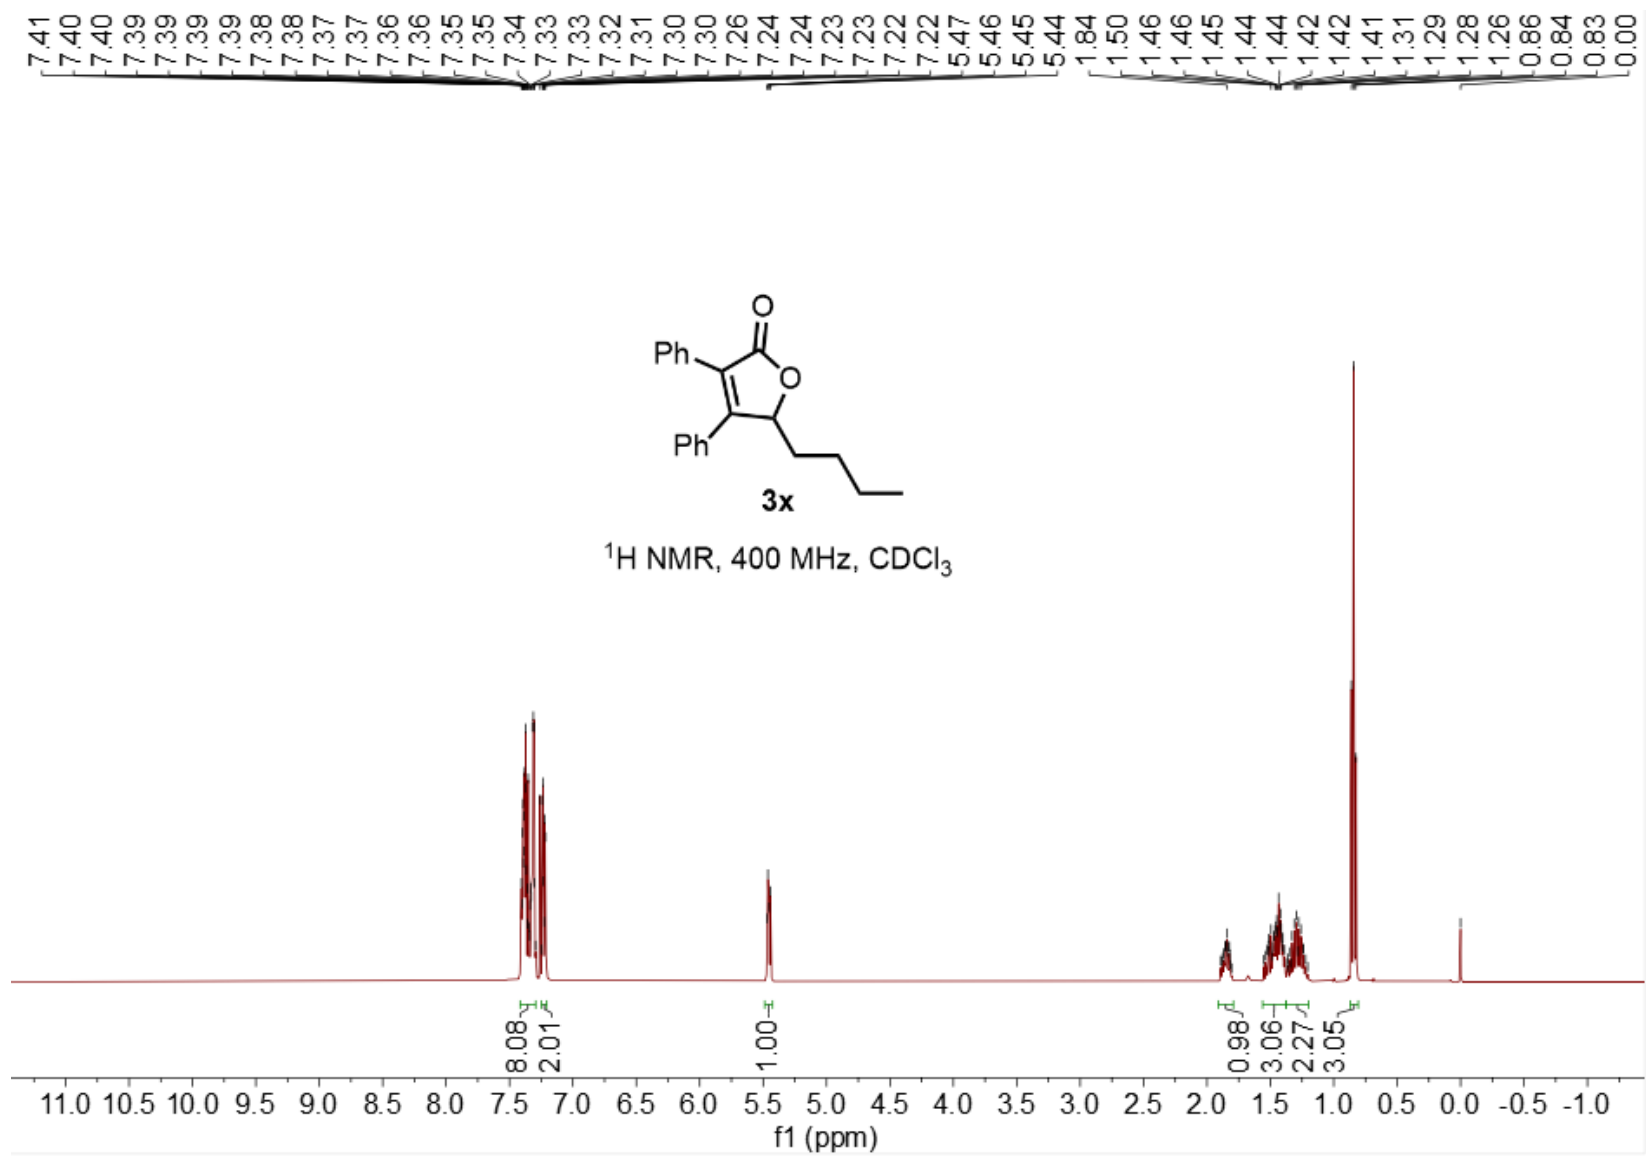



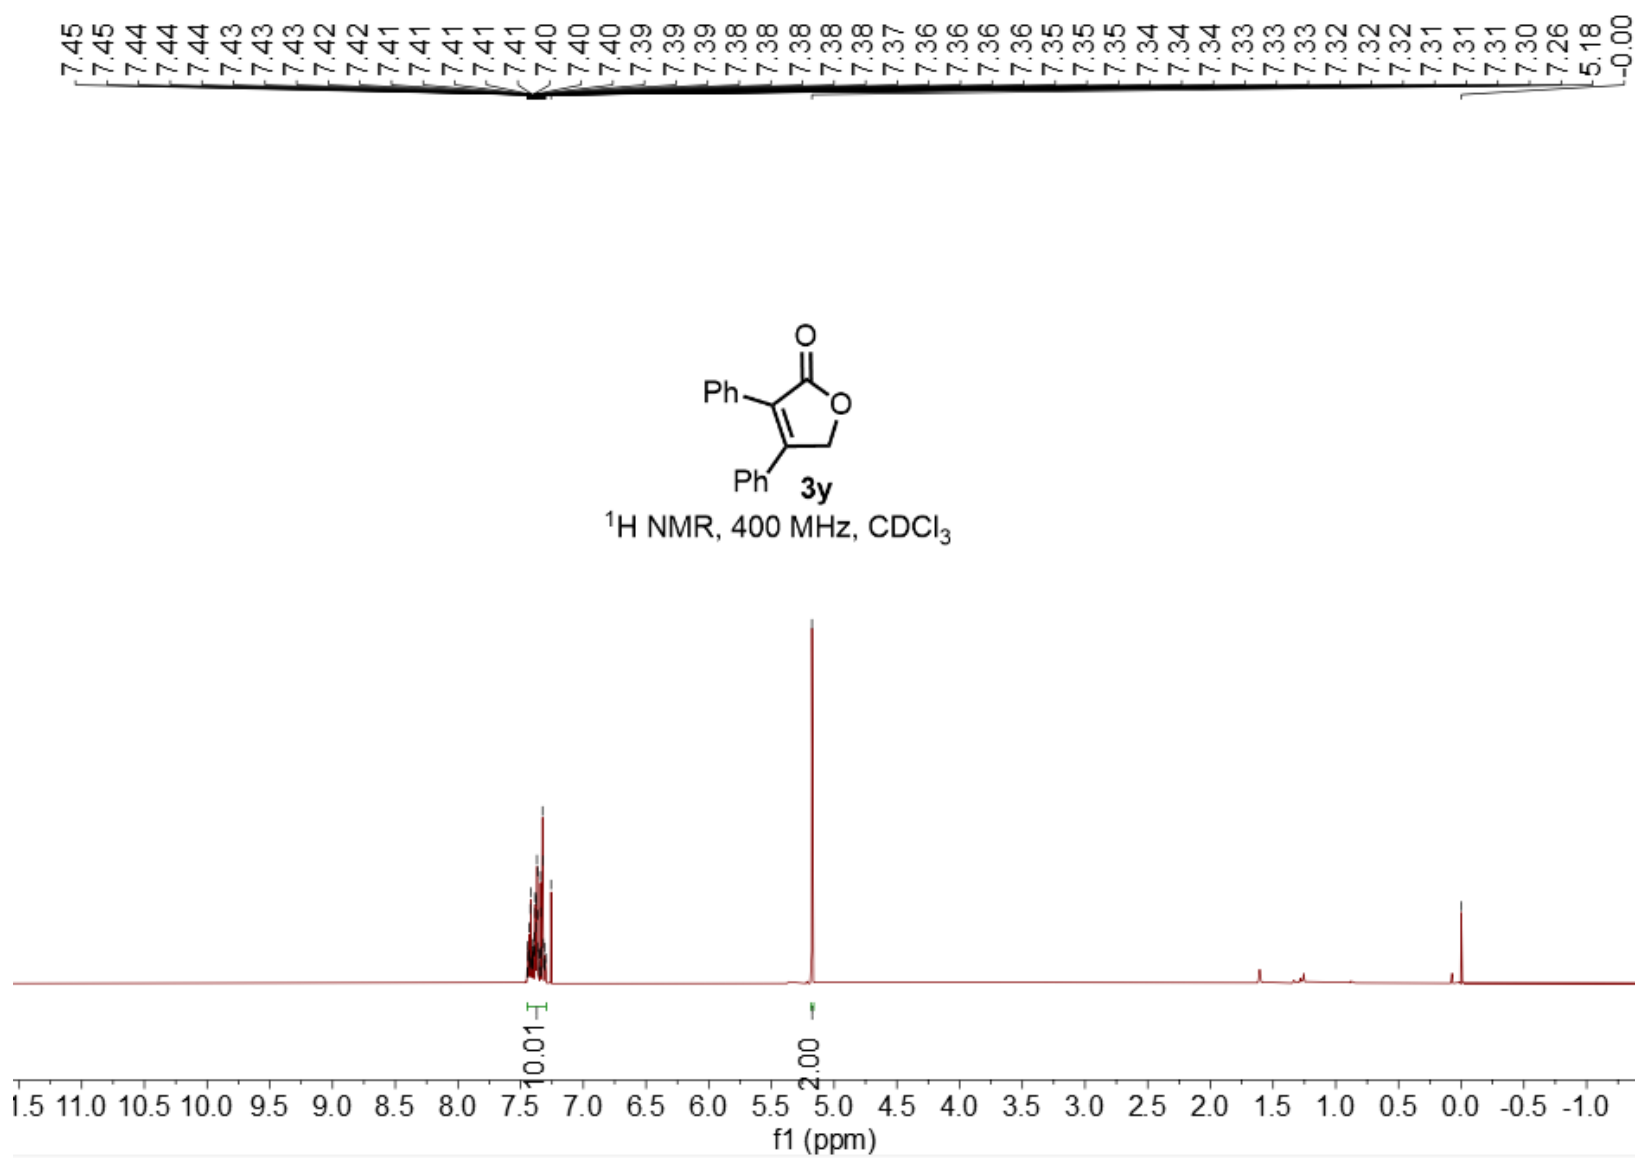

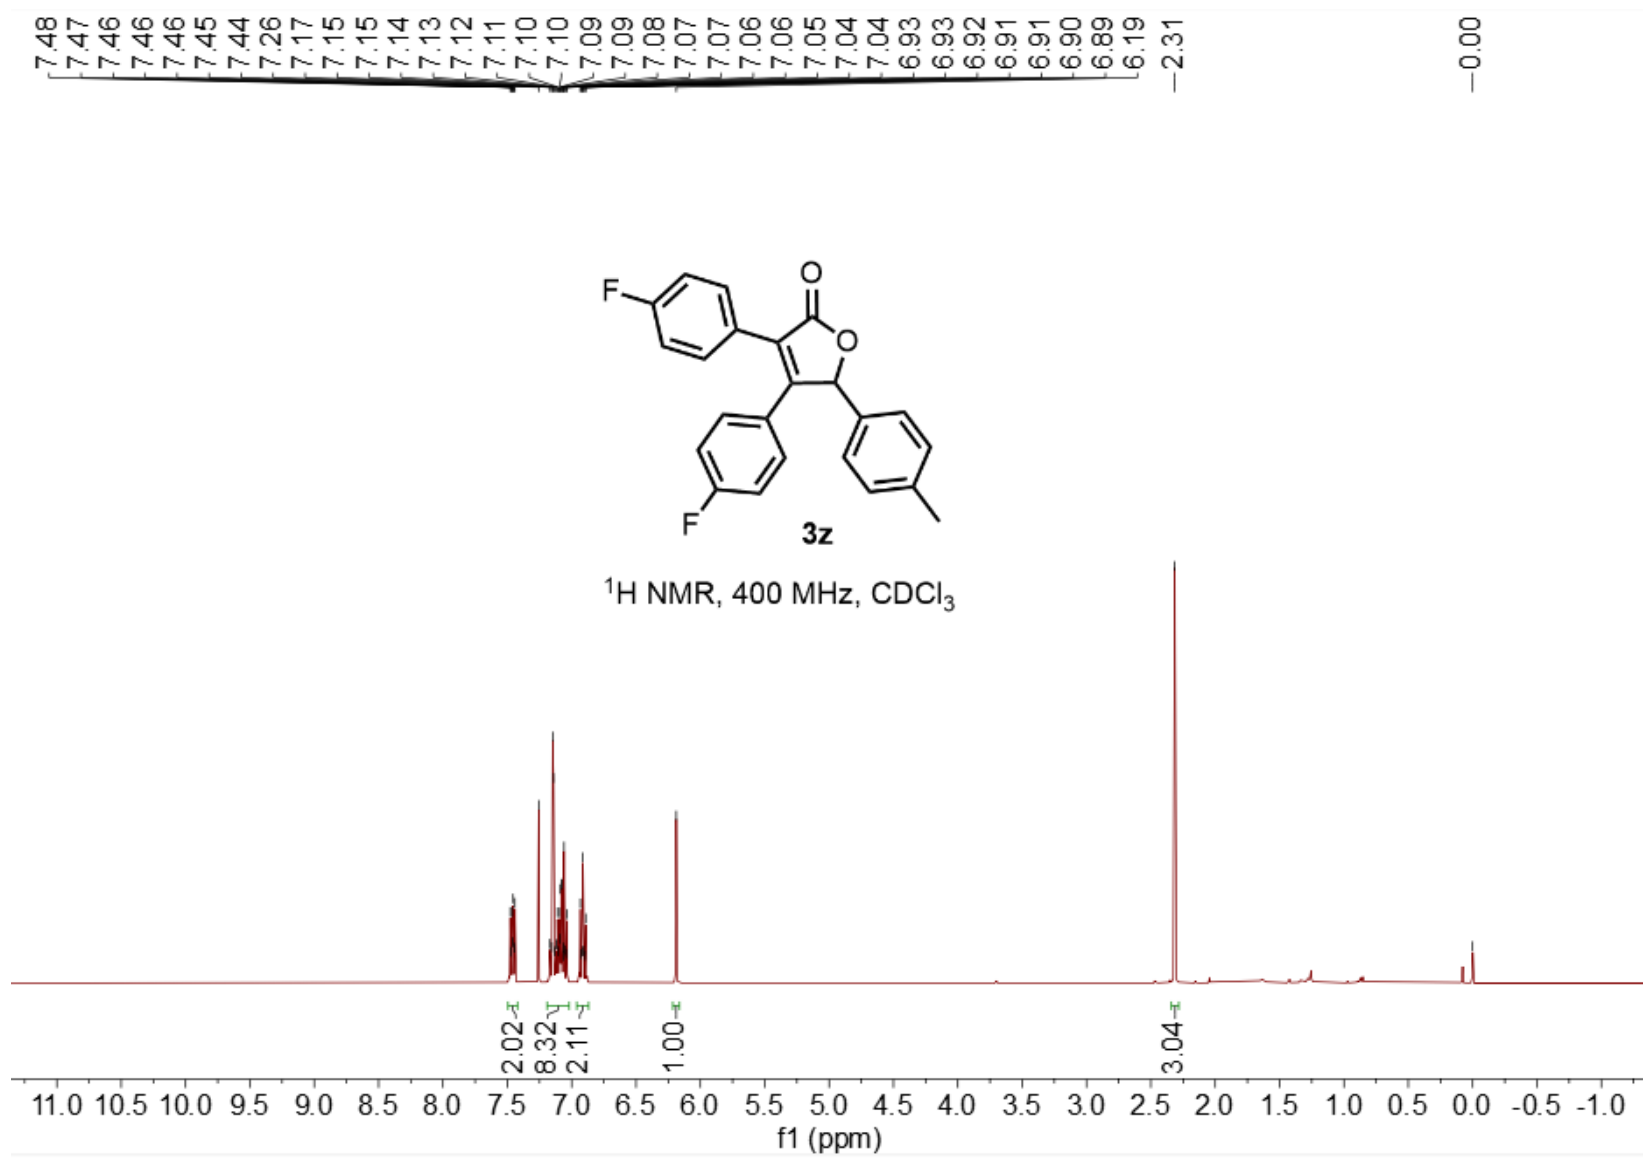

172.4  
164.7  
164.3  
162.2  
161.8  
158.2  
139.7  
131.5  
131.4  
130.6  
130.5  
129.9  
127.7  
127.2  
127.2  
126.0  
125.8  
125.8  
116.4  
116.1  
116.1  
115.9

83.7  
77.5  
77.2  
76.8

-21.4

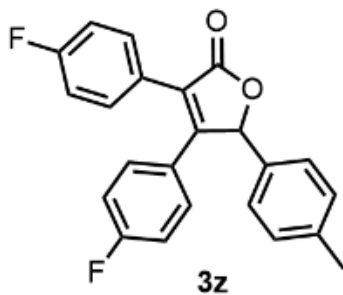

<sup>13</sup>C NMR, 100 MHz, CDCl<sub>3</sub>

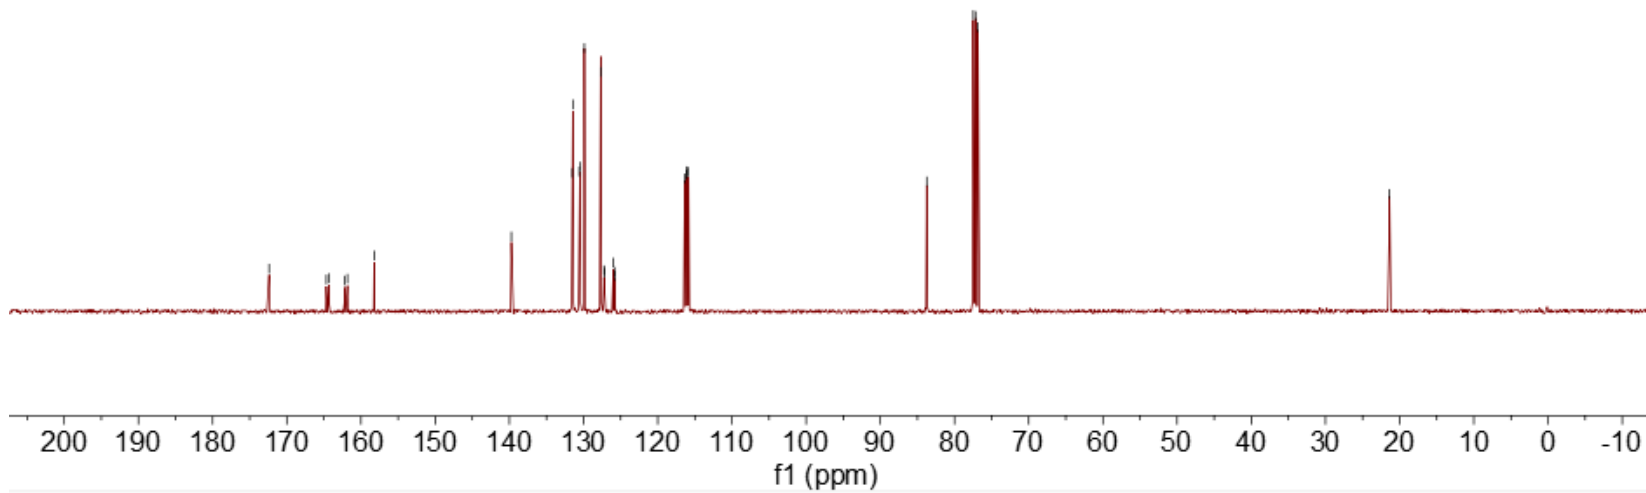

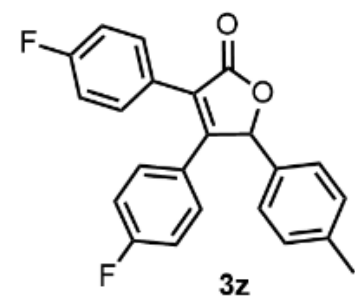

$^{19}\text{F}$  NMR, 376 MHz,  $\text{CDCl}_3$

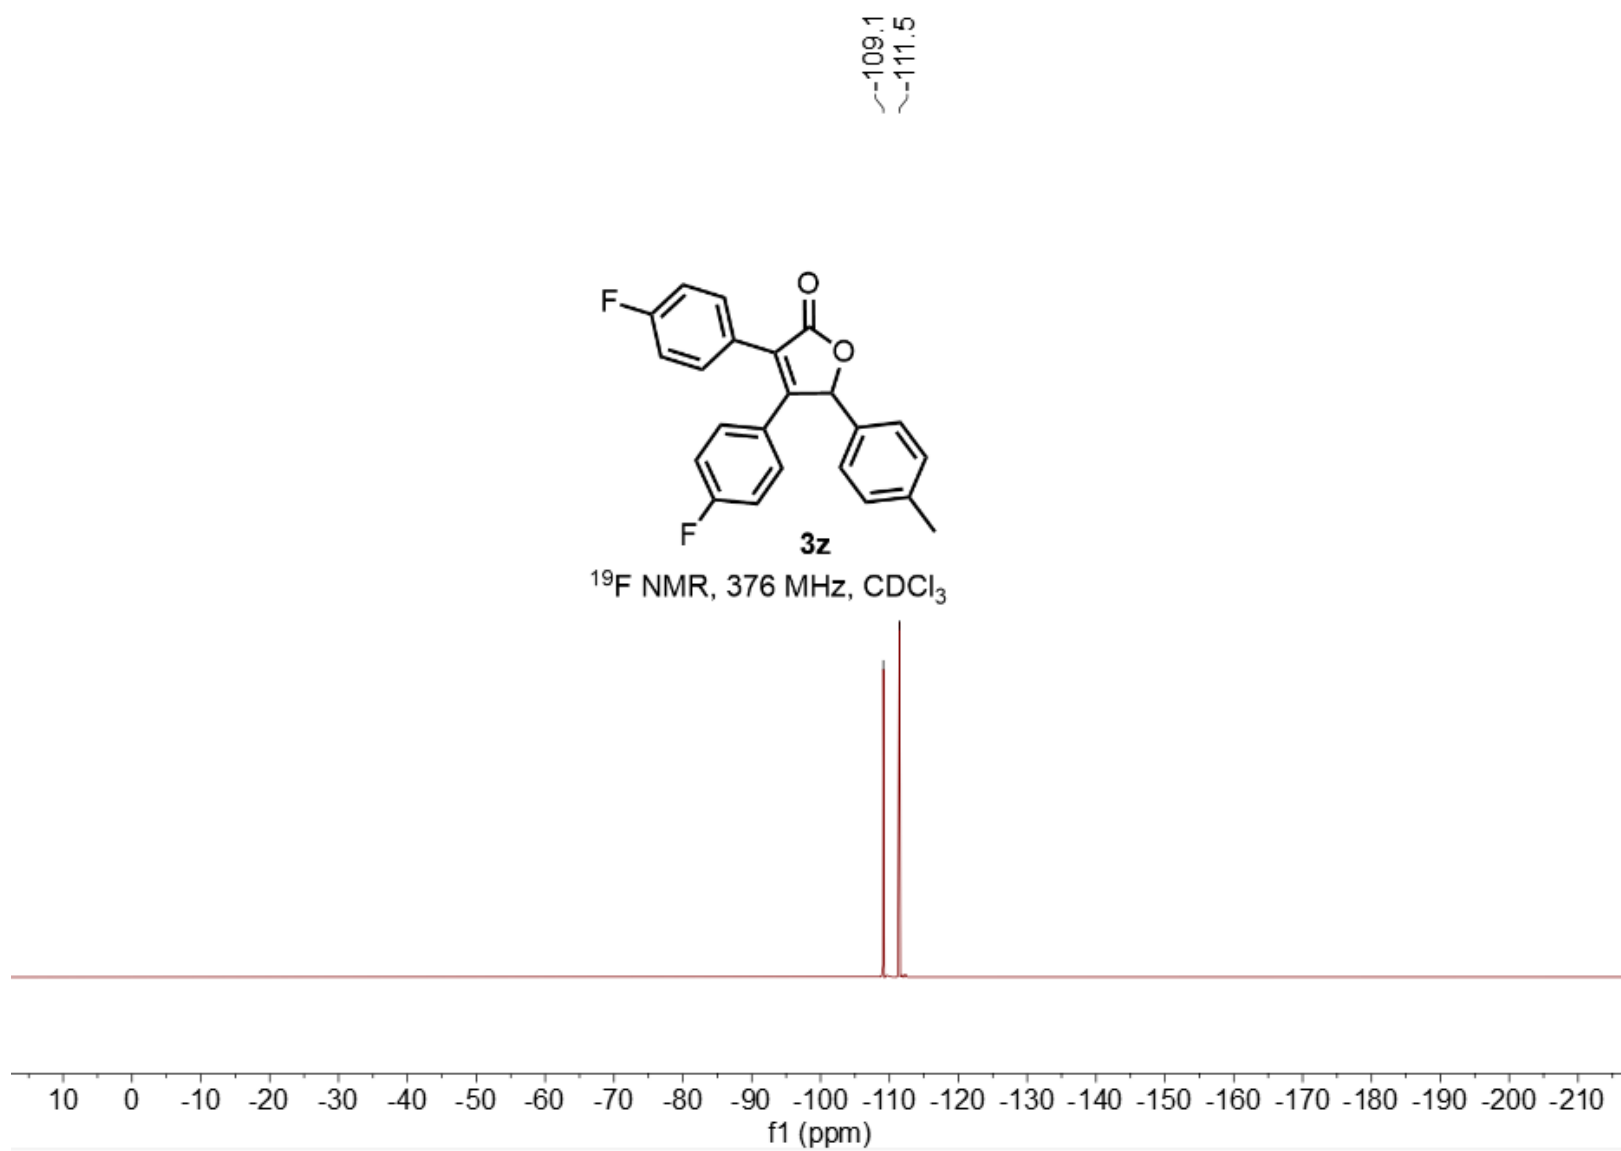

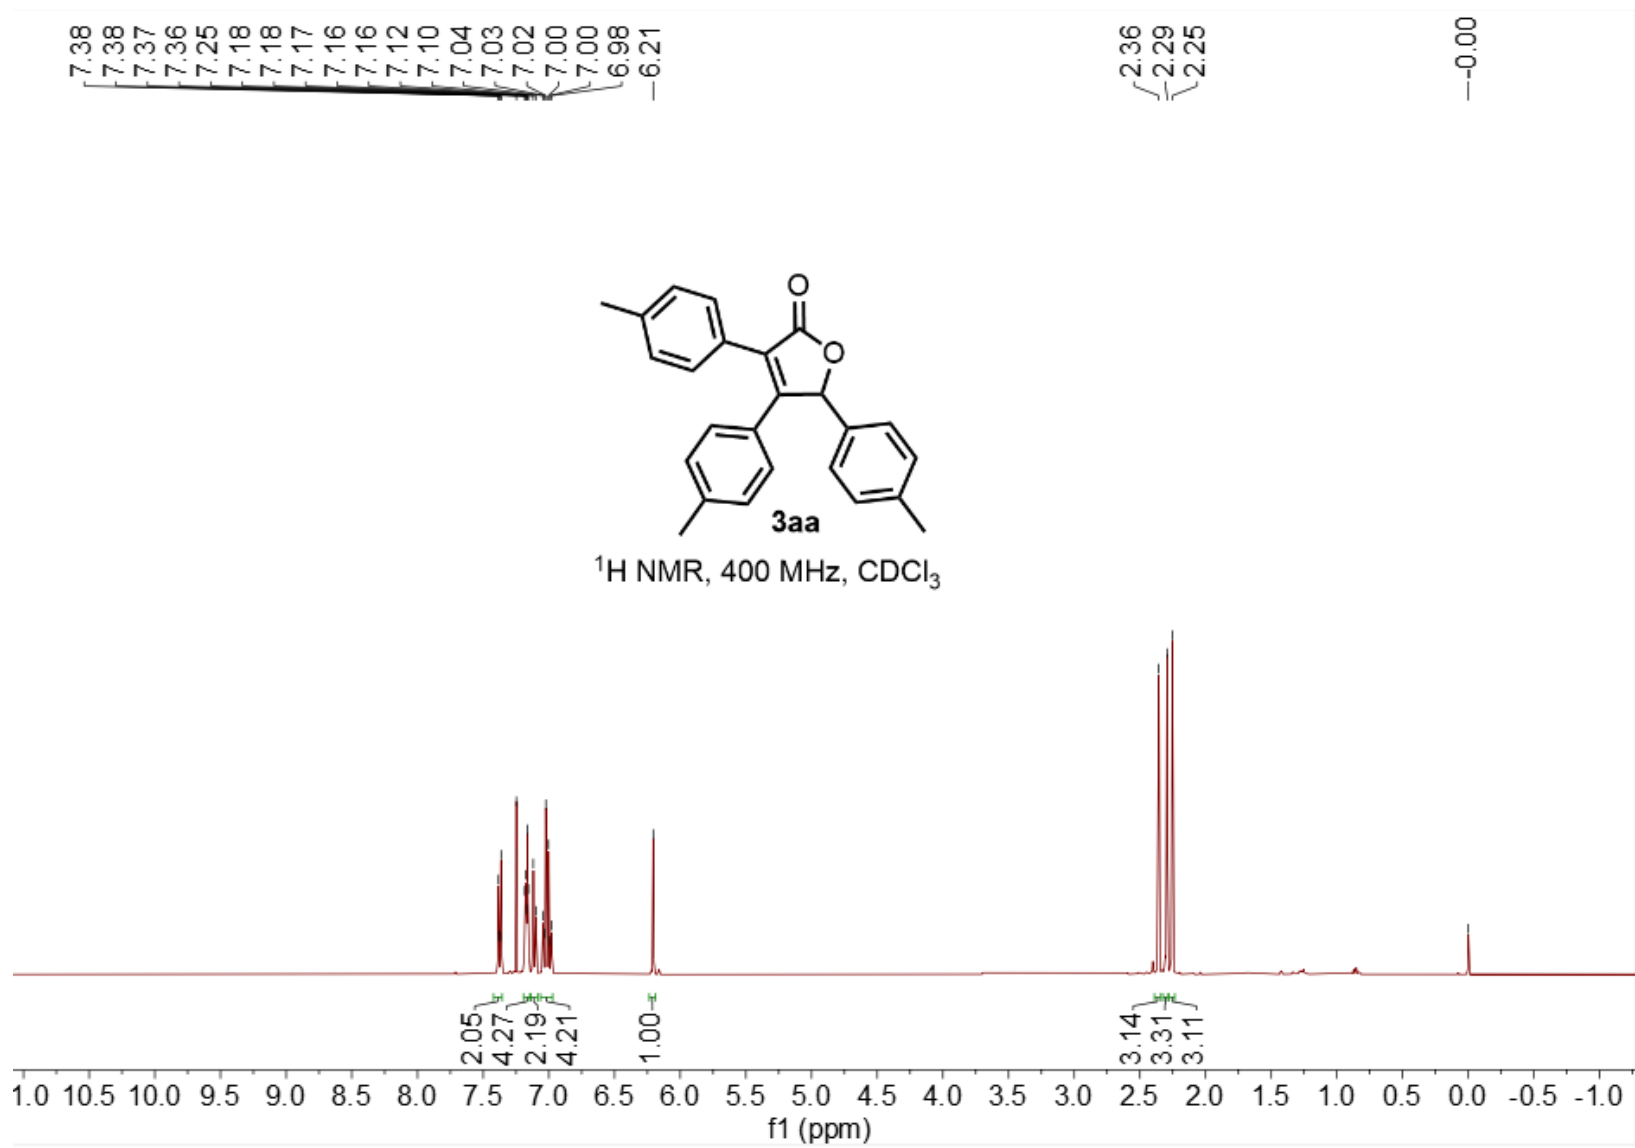

-173.0

-158.6

-140.2

-139.3

-138.8

-132.2

-129.7

-129.5

-129.4

-128.5

-128.4

-127.8

-127.3

-126.3

83.6

77.5

77.2

76.8

21.5

21.5

21.4

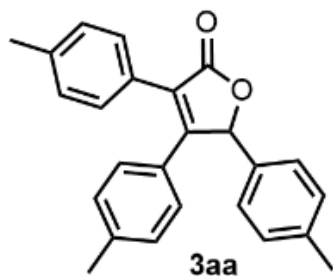

$^{13}\text{C}$  NMR, 100 MHz,  $\text{CDCl}_3$

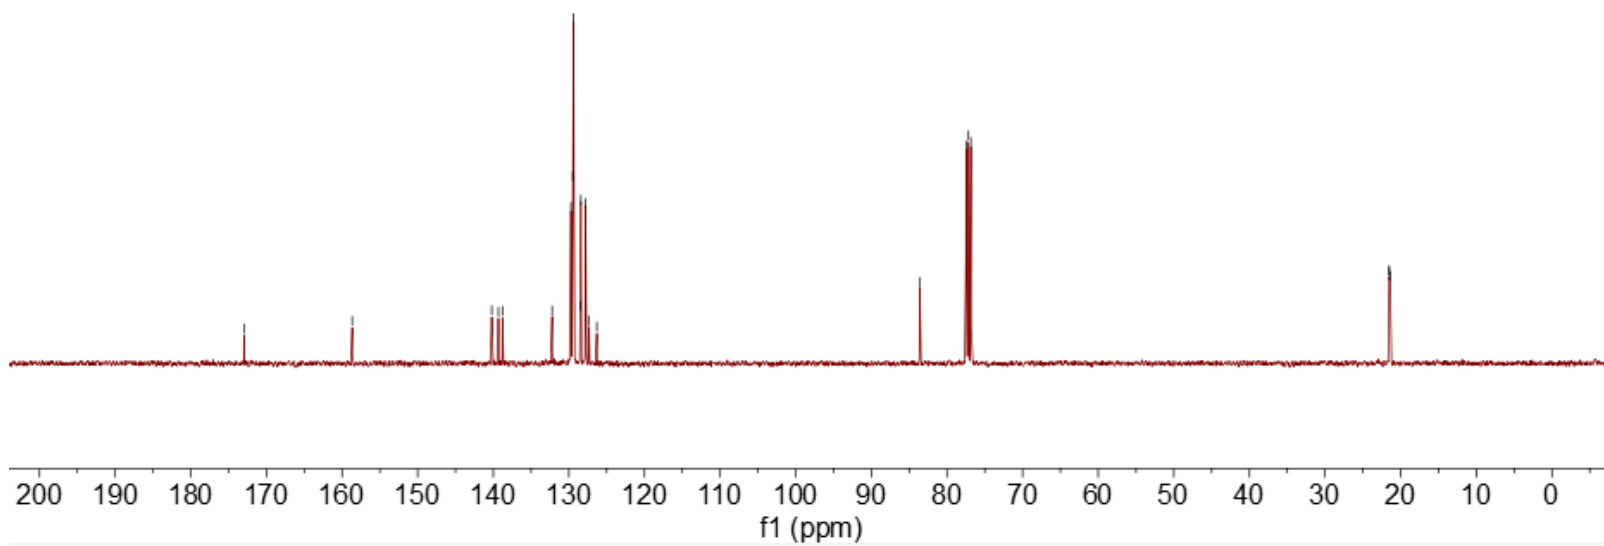

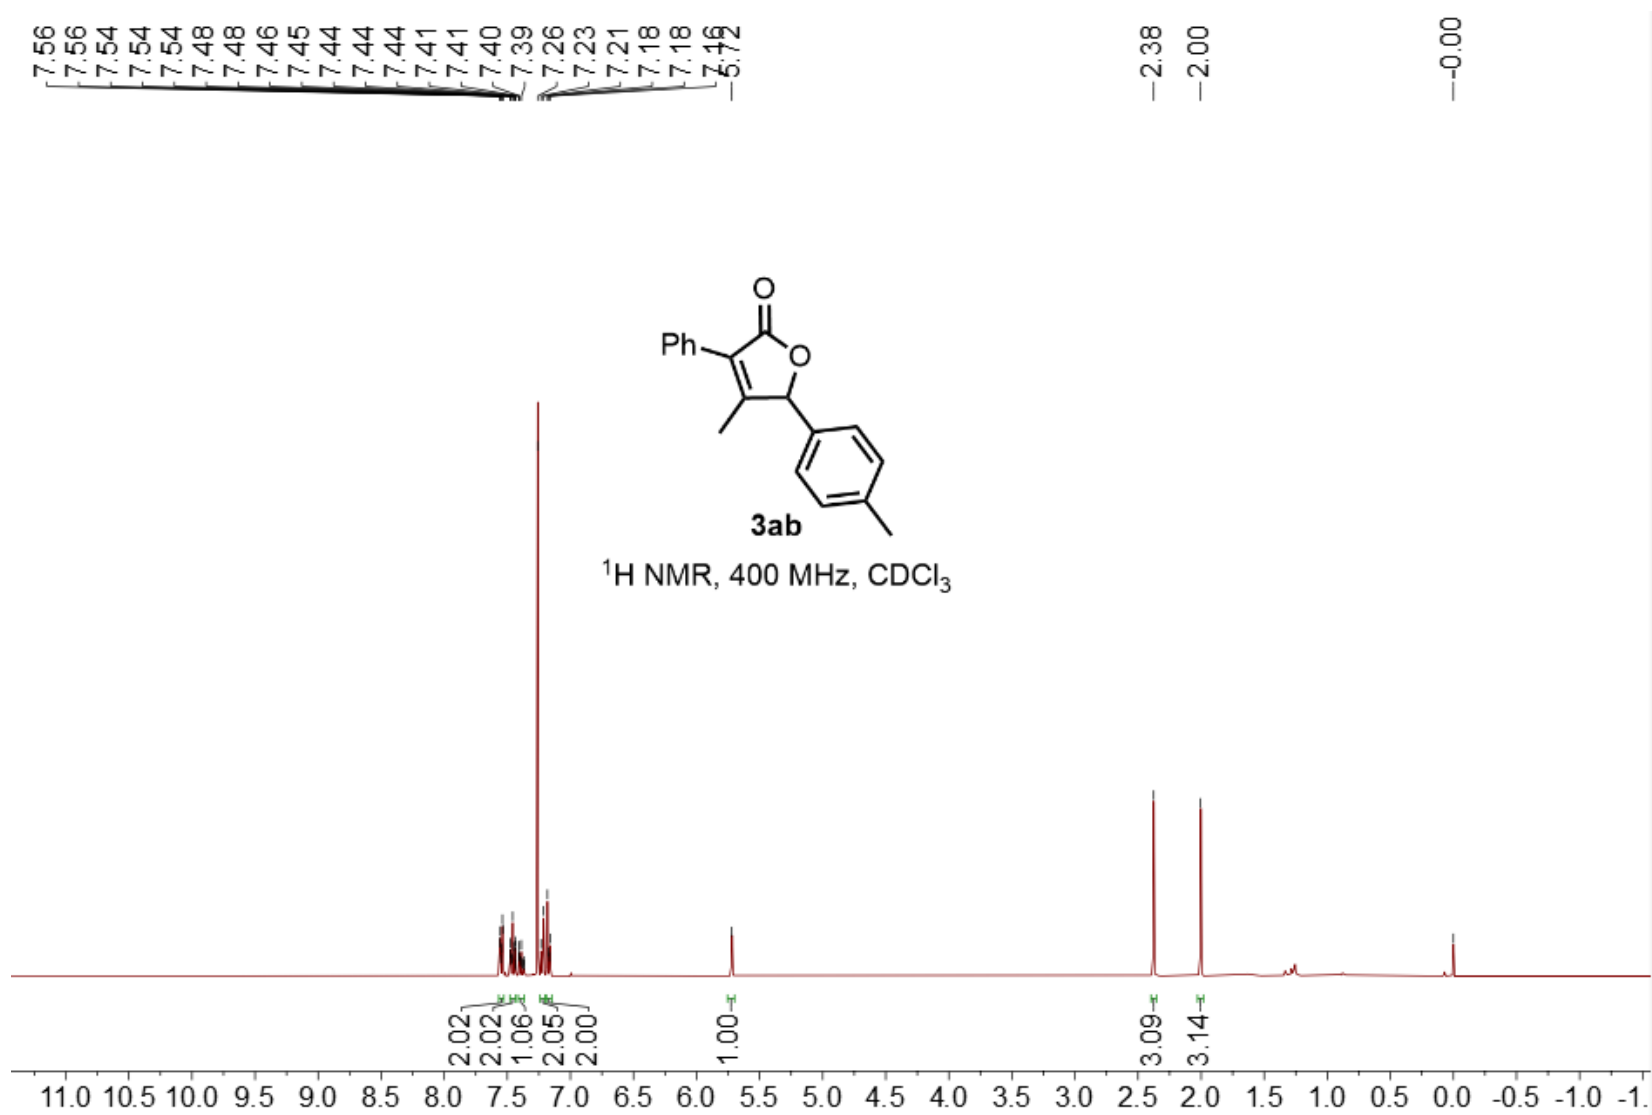

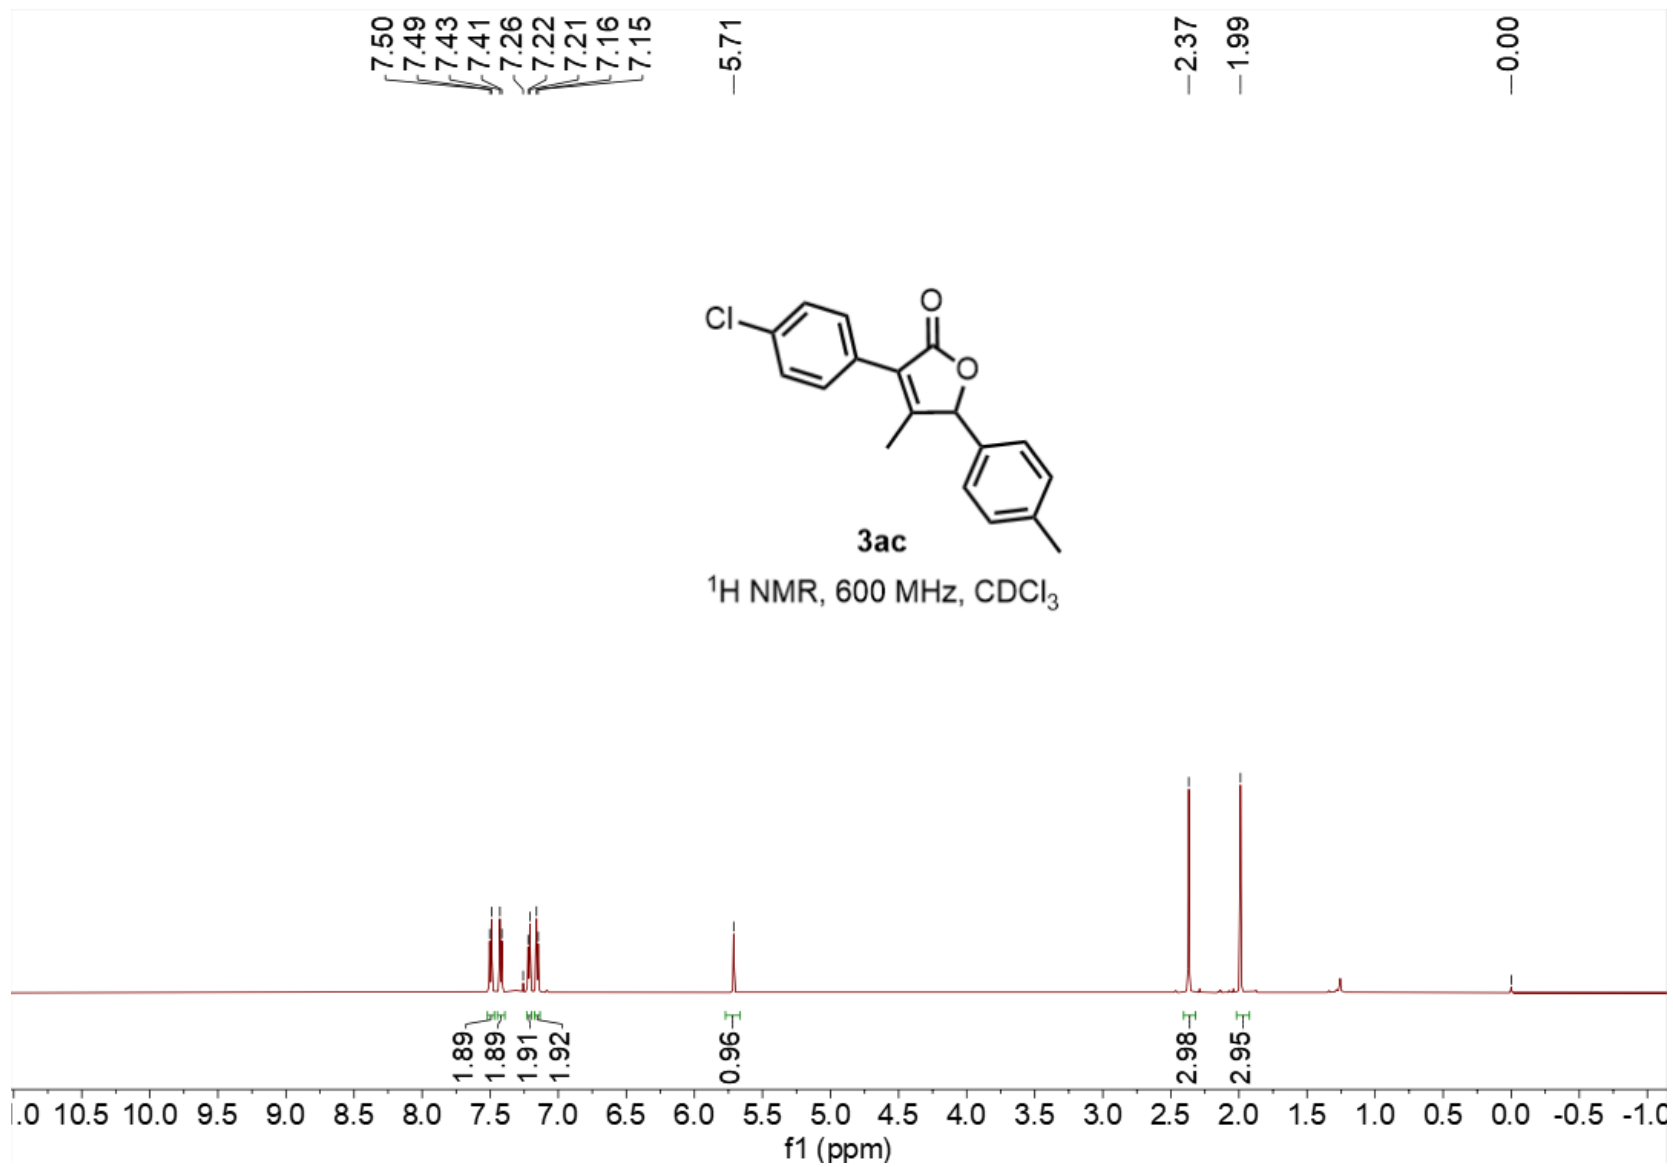



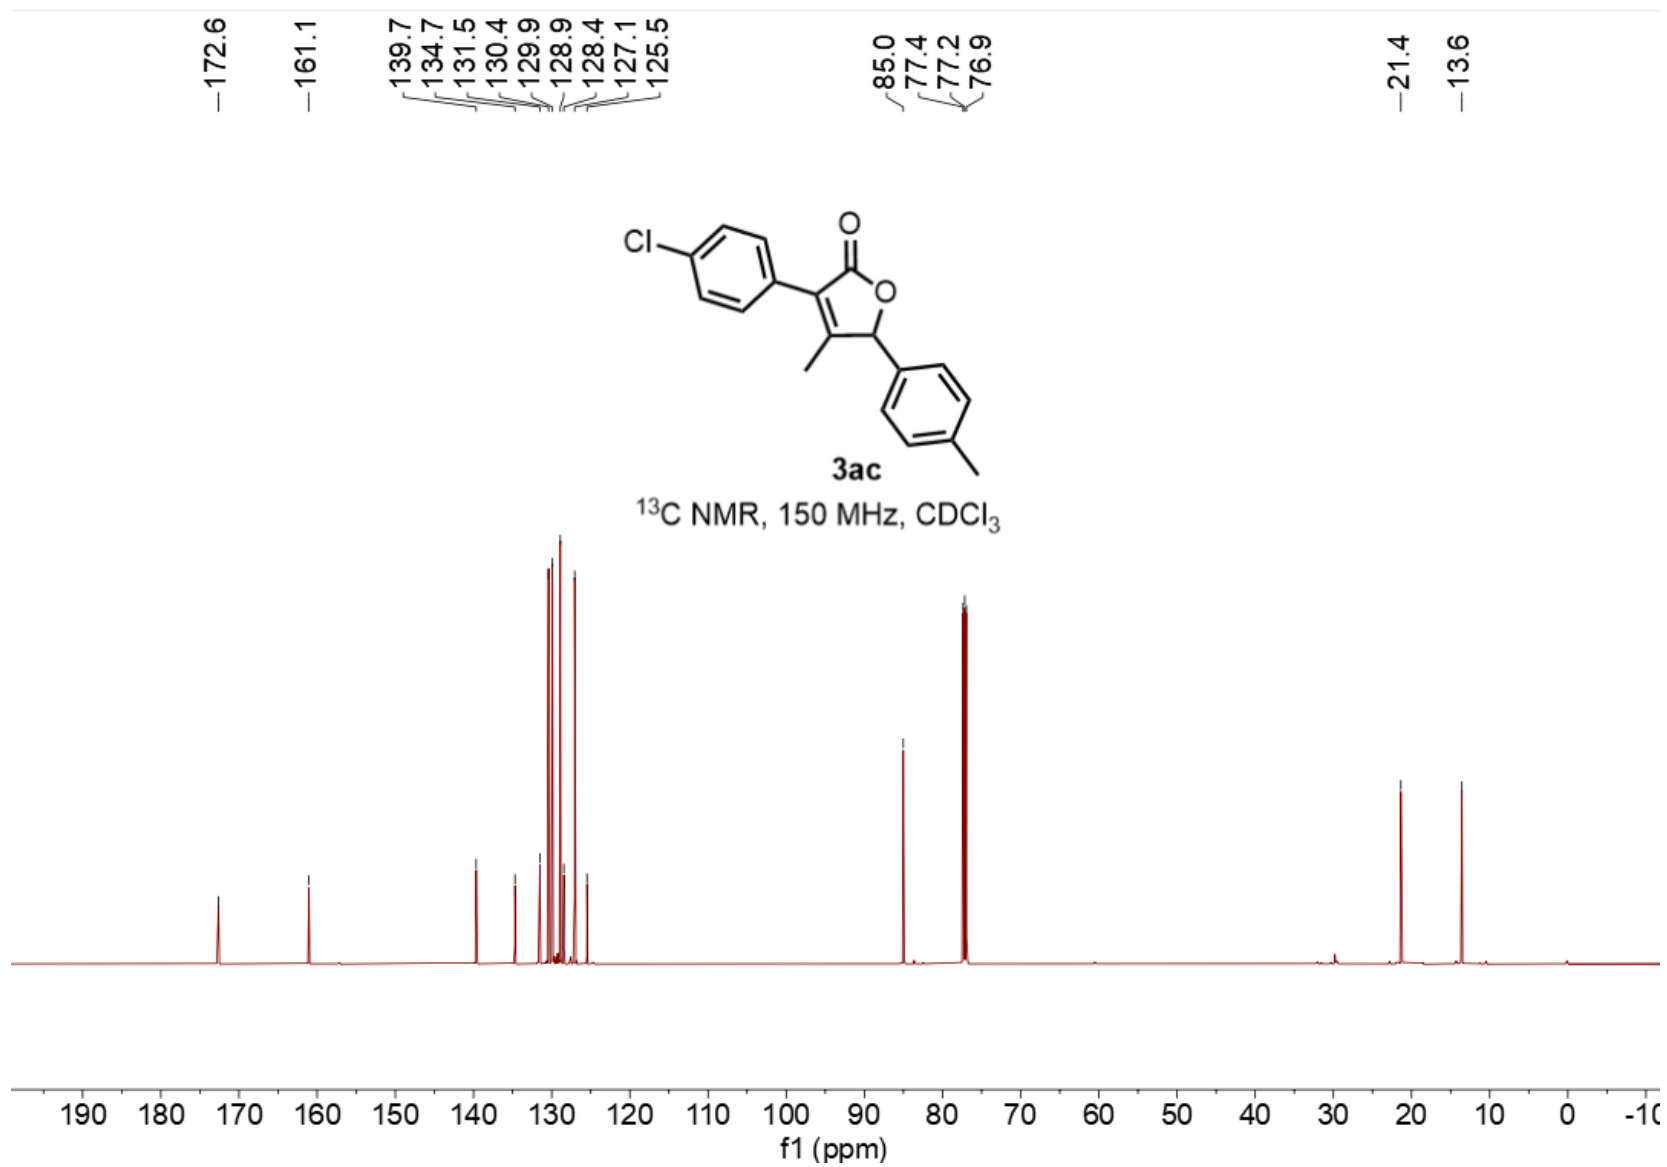

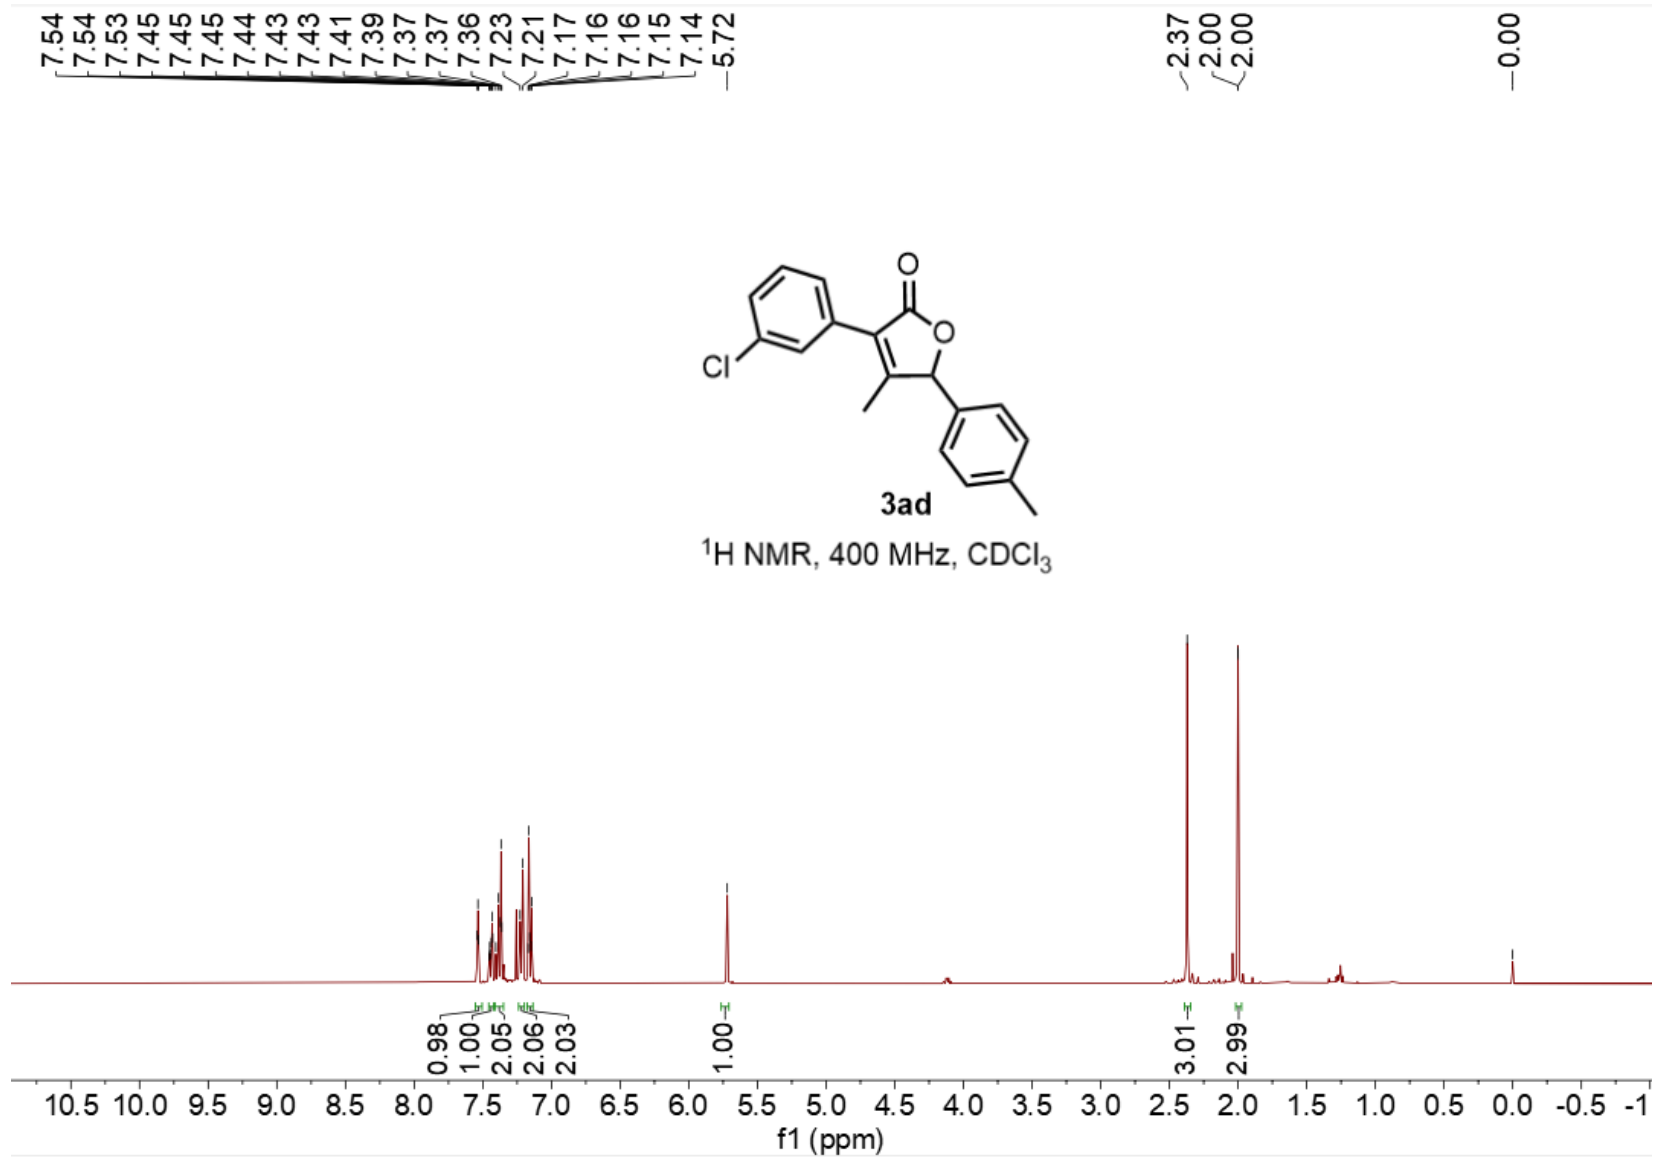

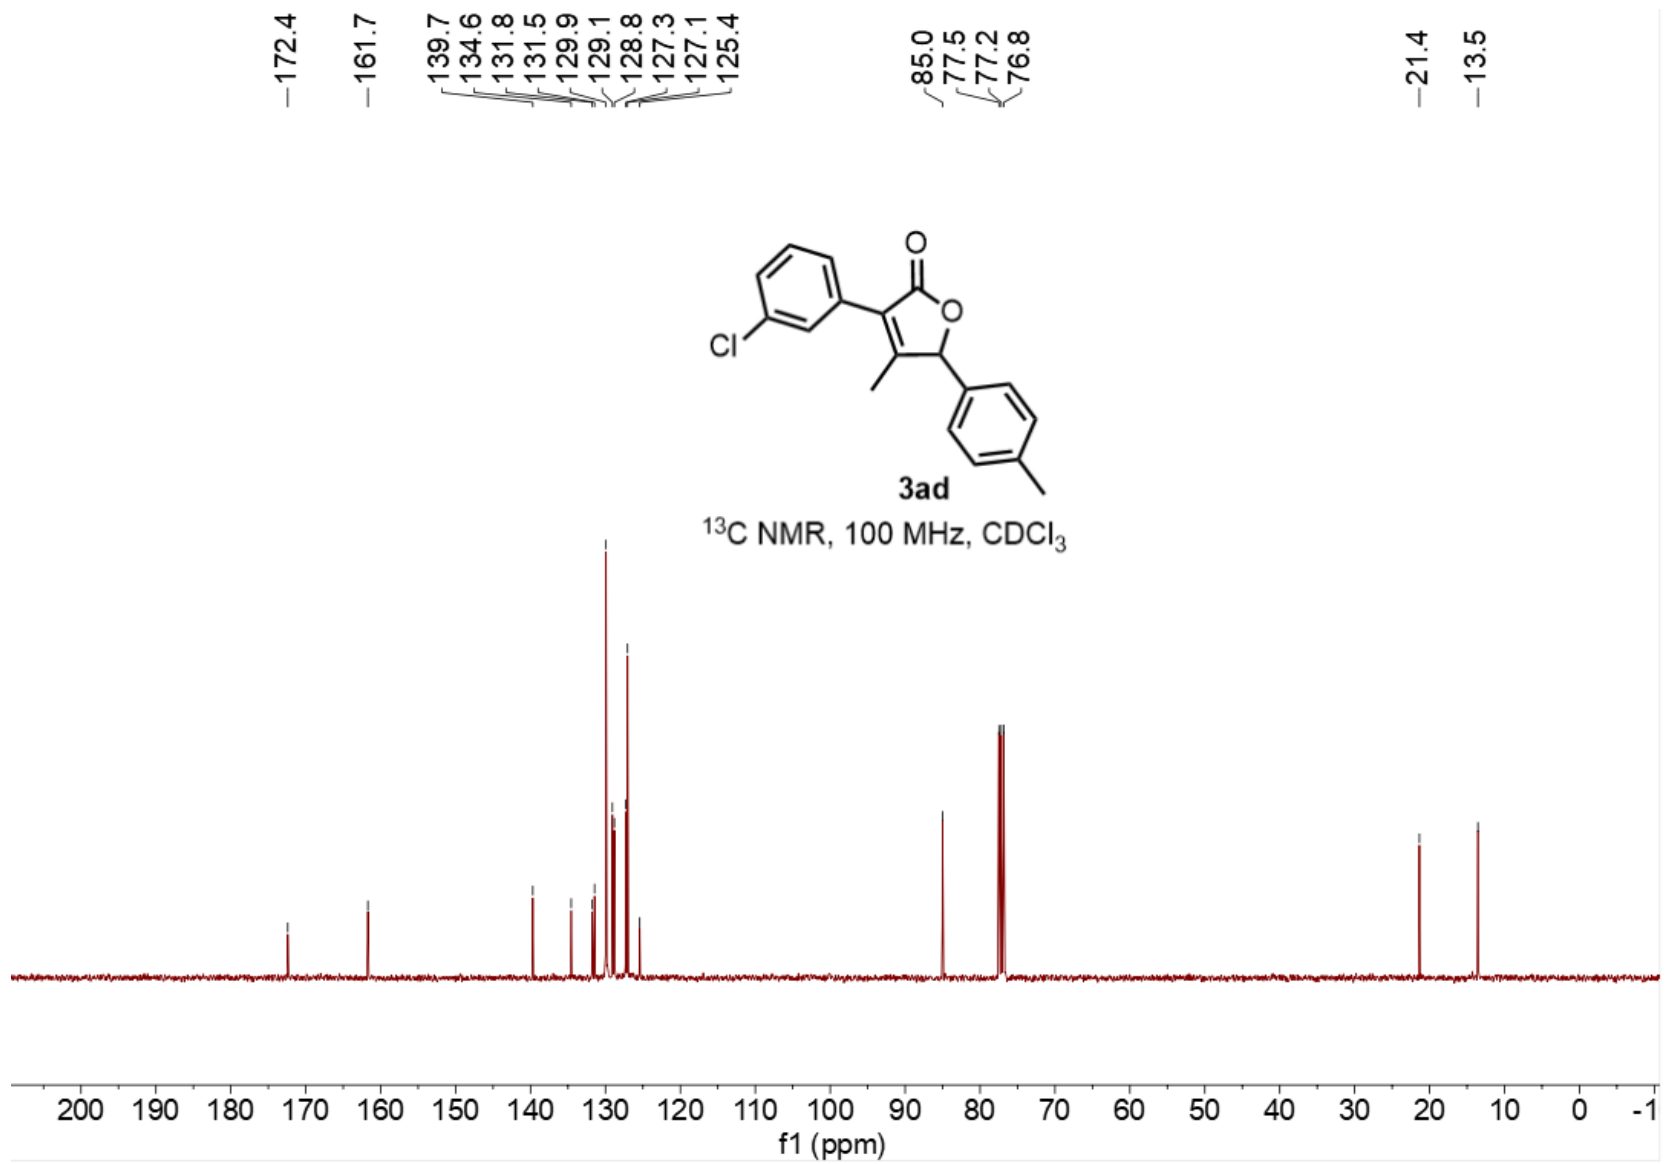

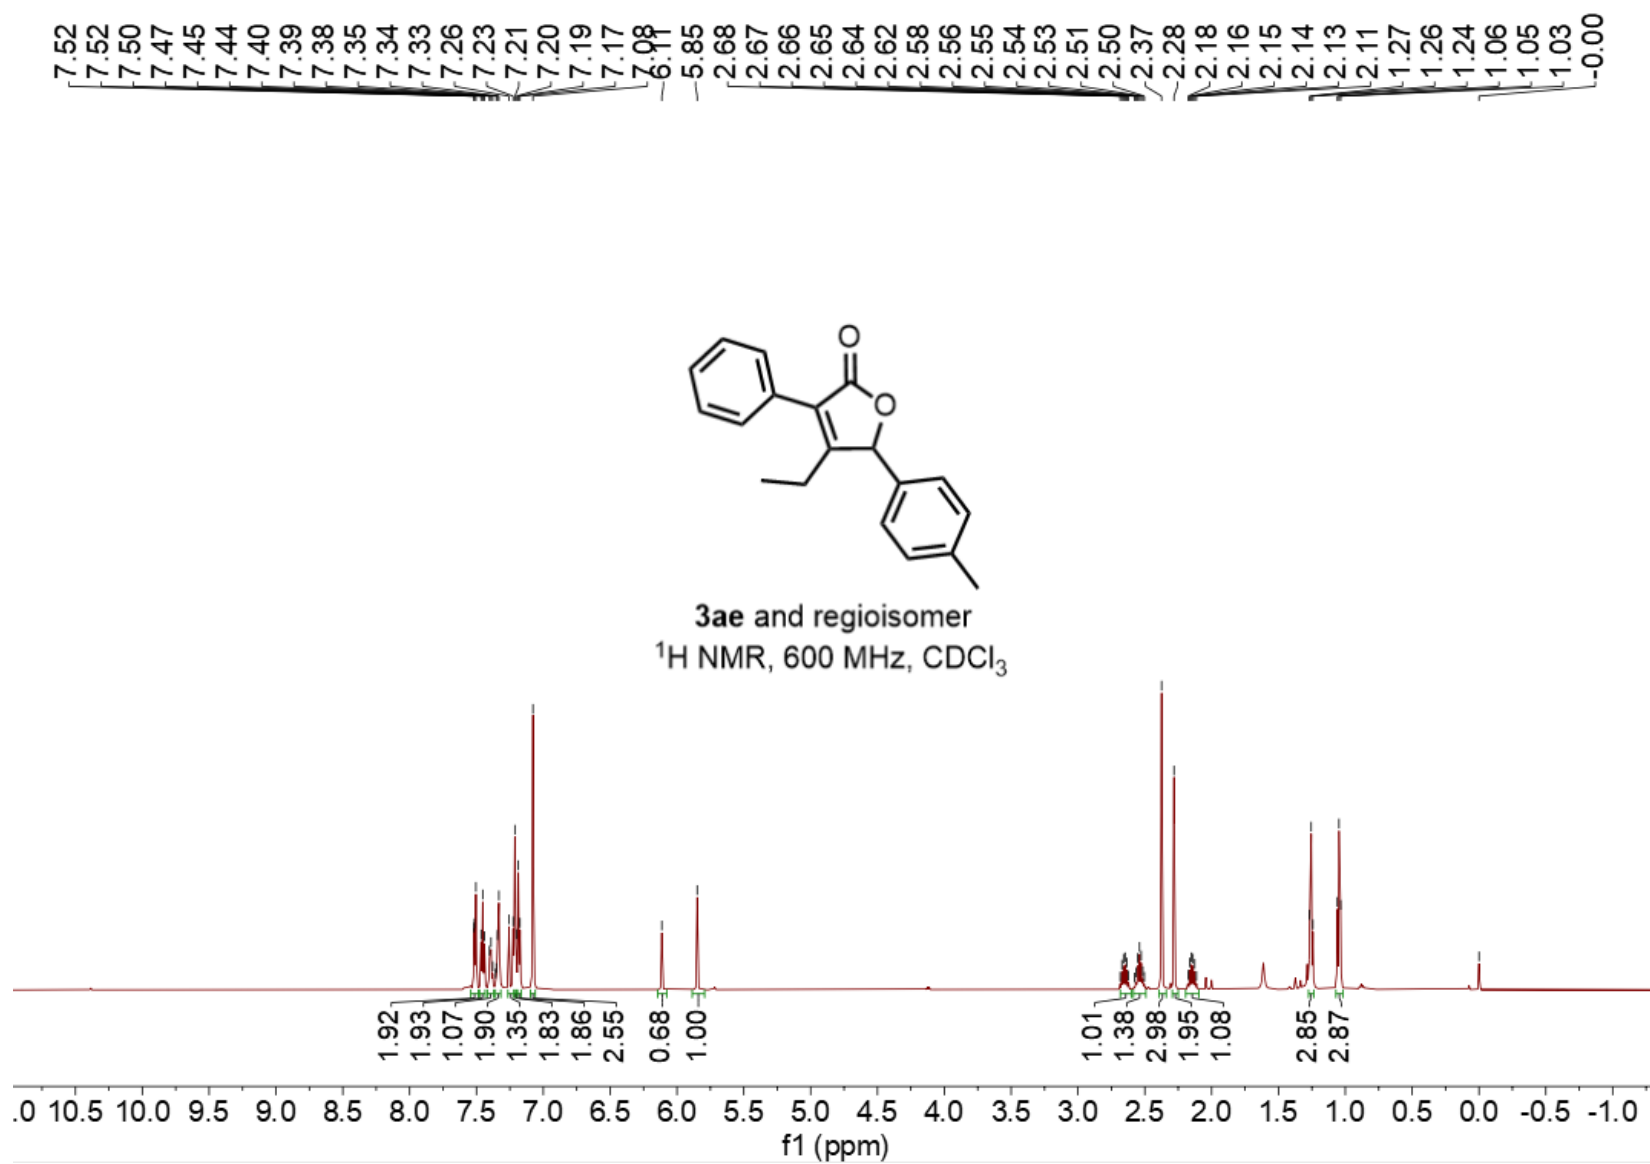

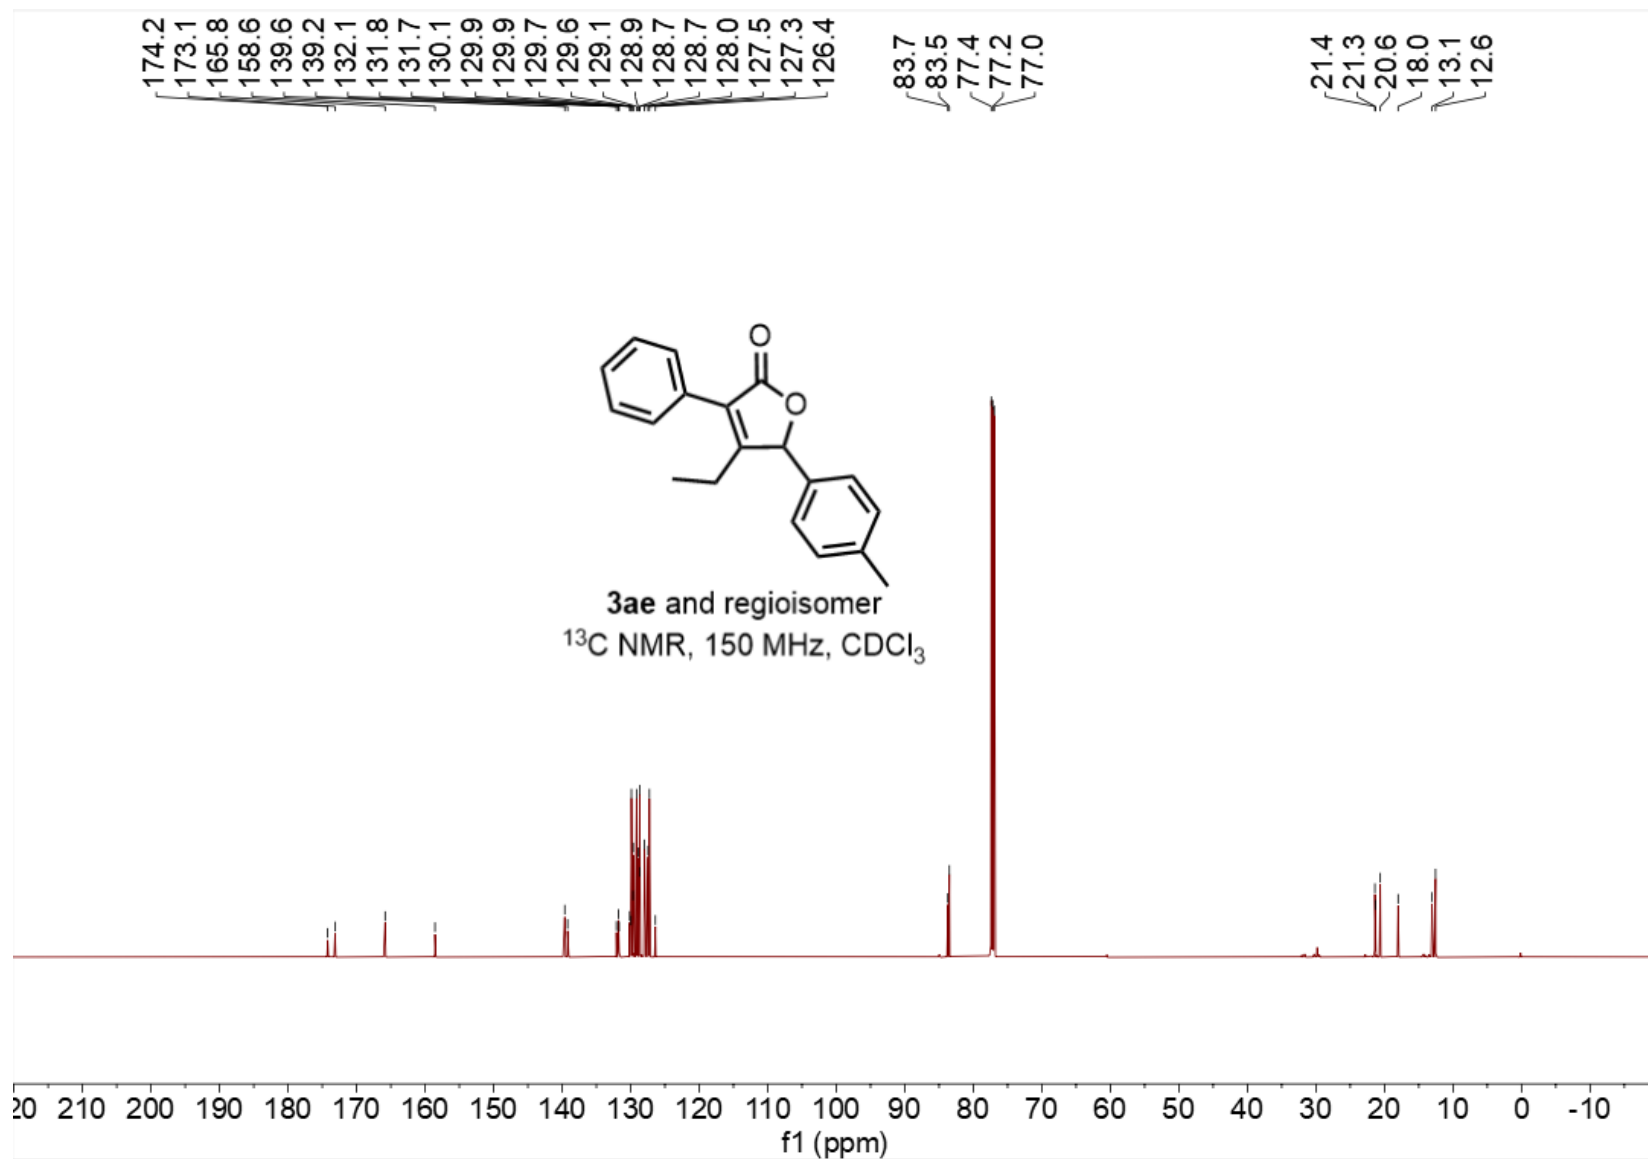

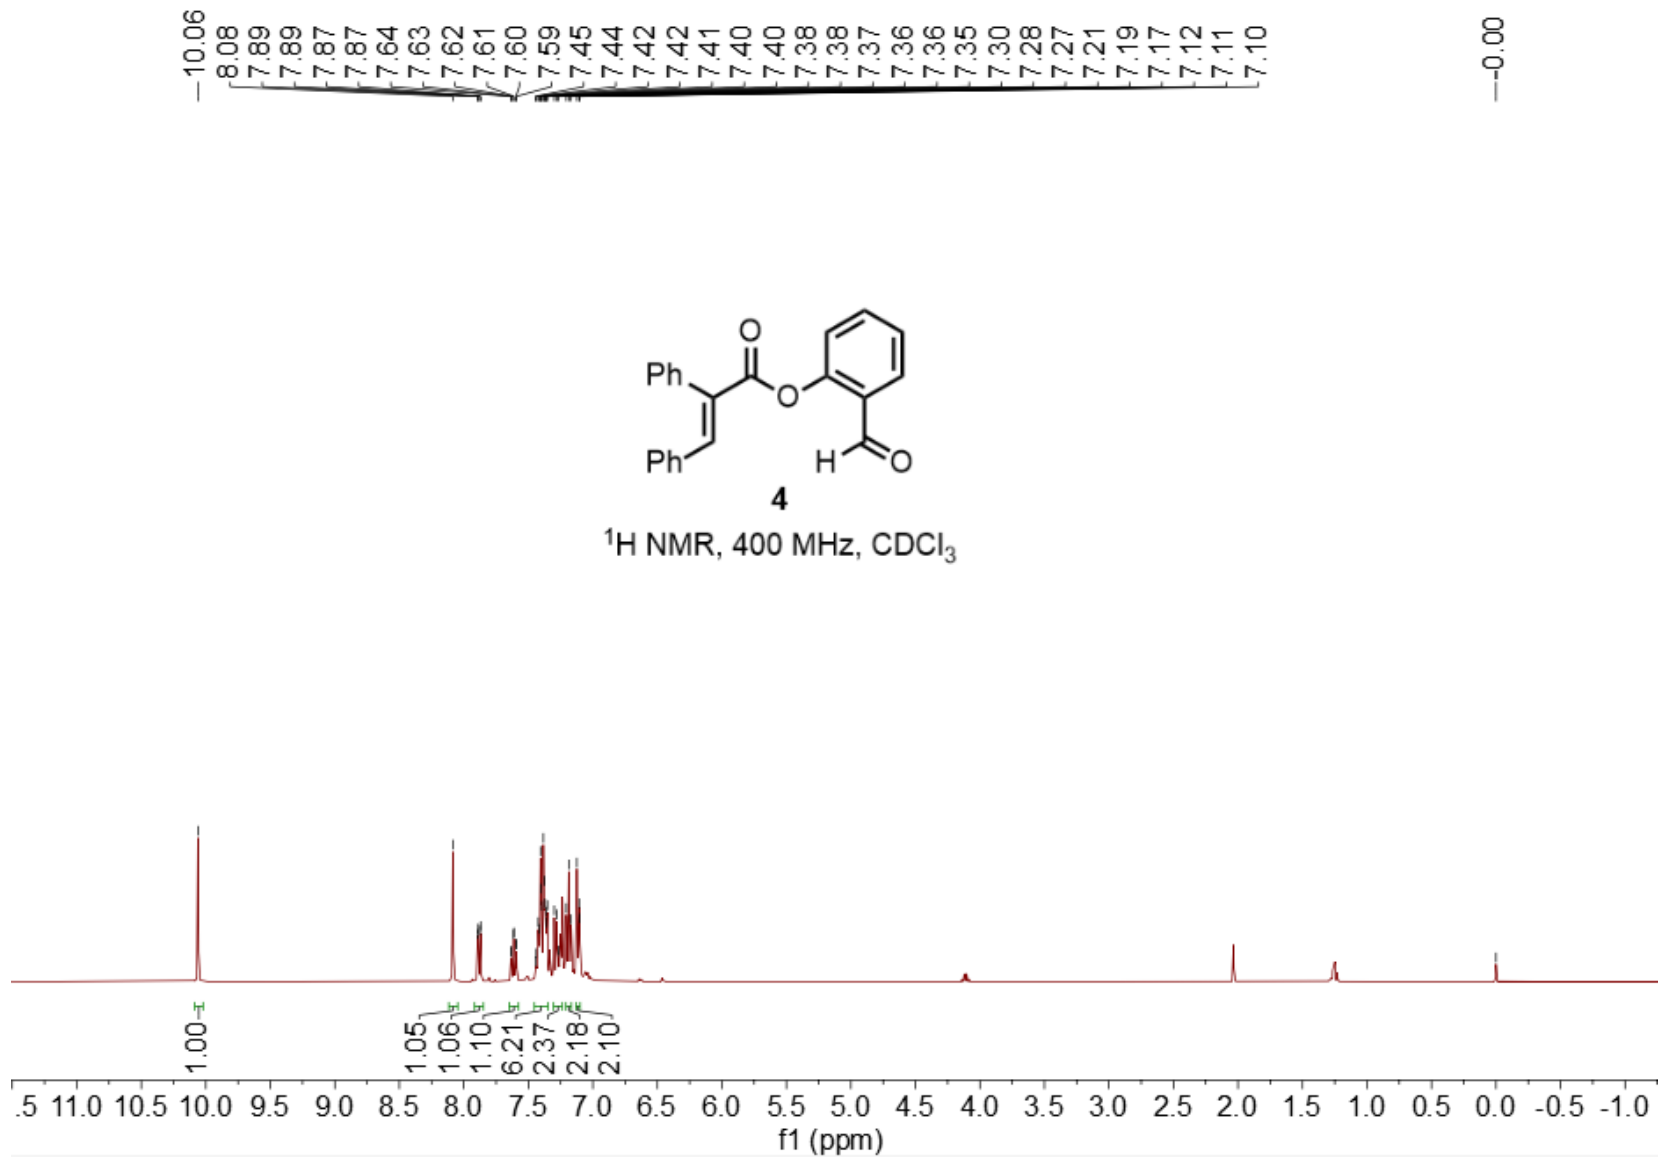

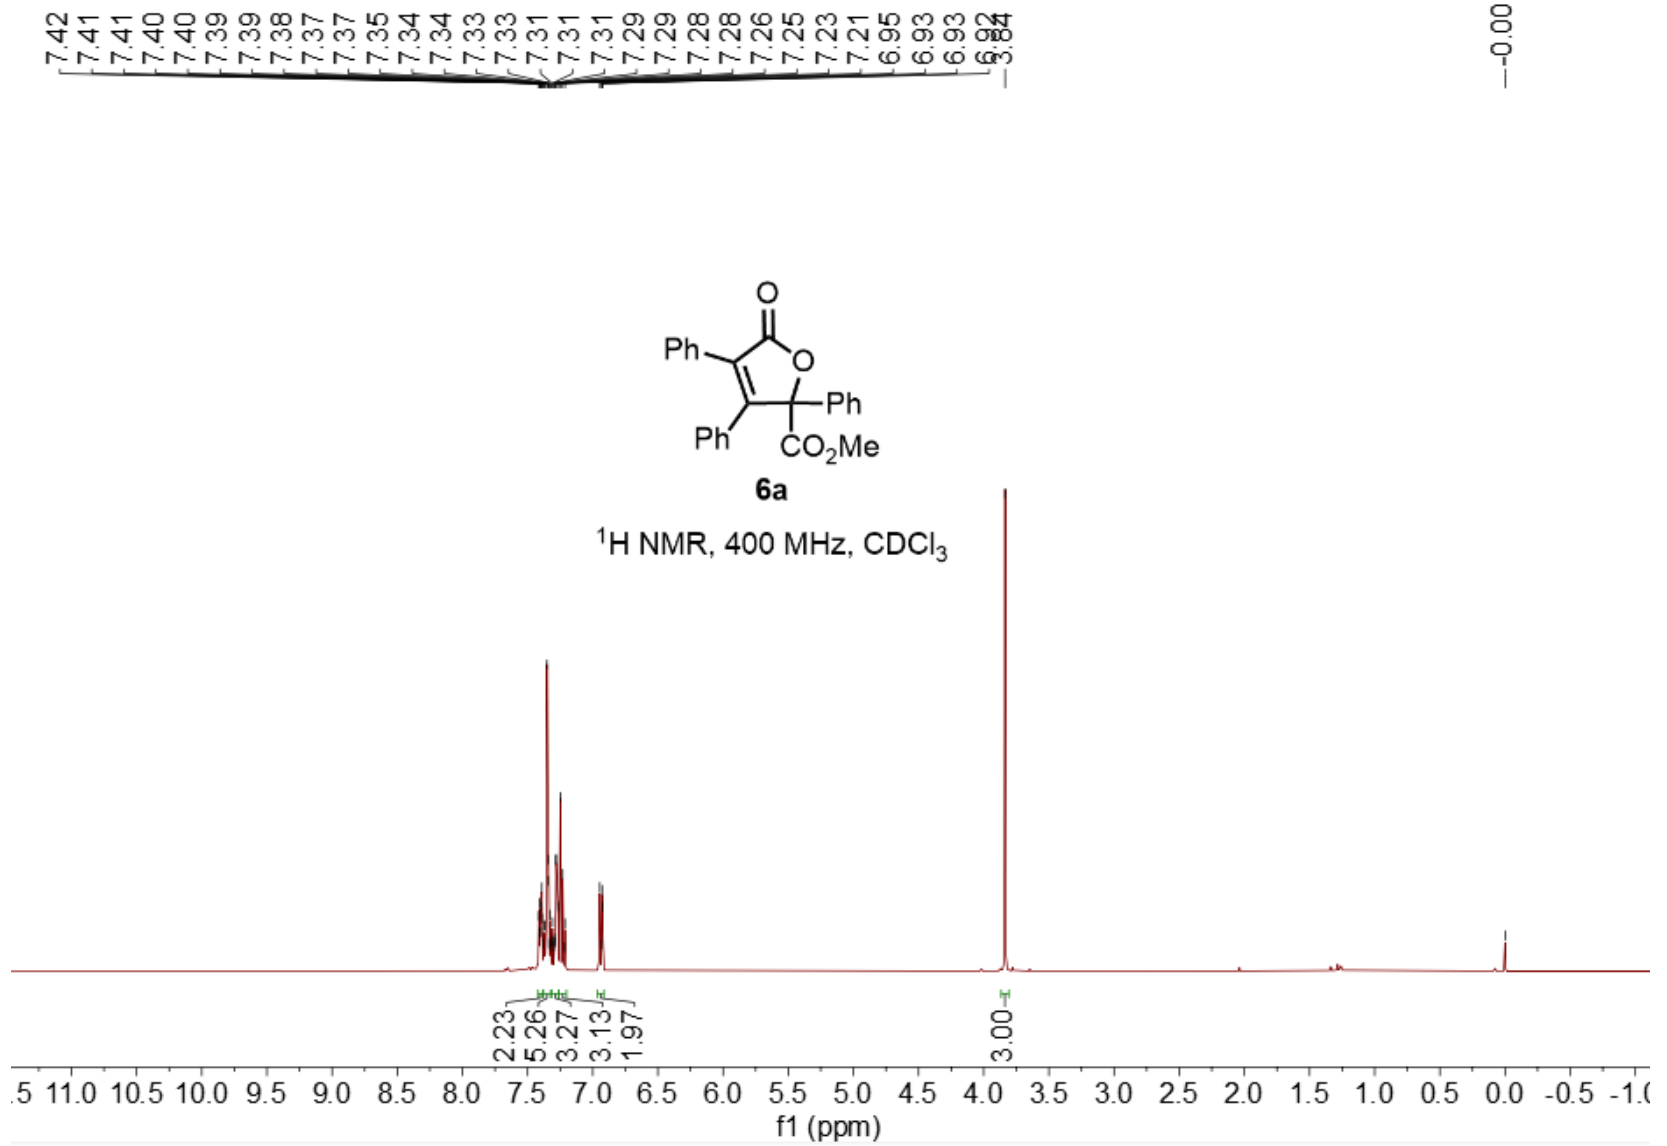

171.2  
167.7  
159.7

134.0  
131.2  
129.8  
129.5  
129.2  
128.6  
128.5  
128.0  
127.1

89.6

77.5  
77.2  
76.8

53.7

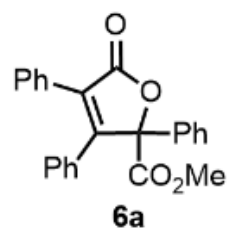

<sup>13</sup>C NMR, 100 MHz, CDCl<sub>3</sub>

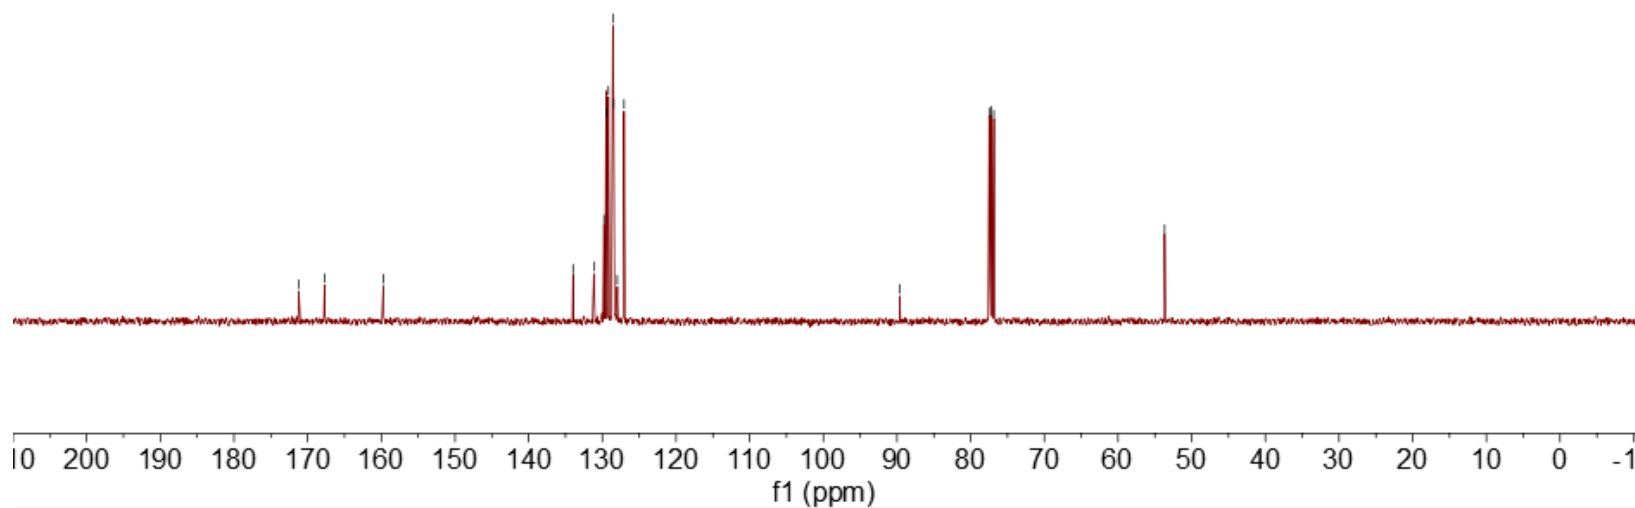



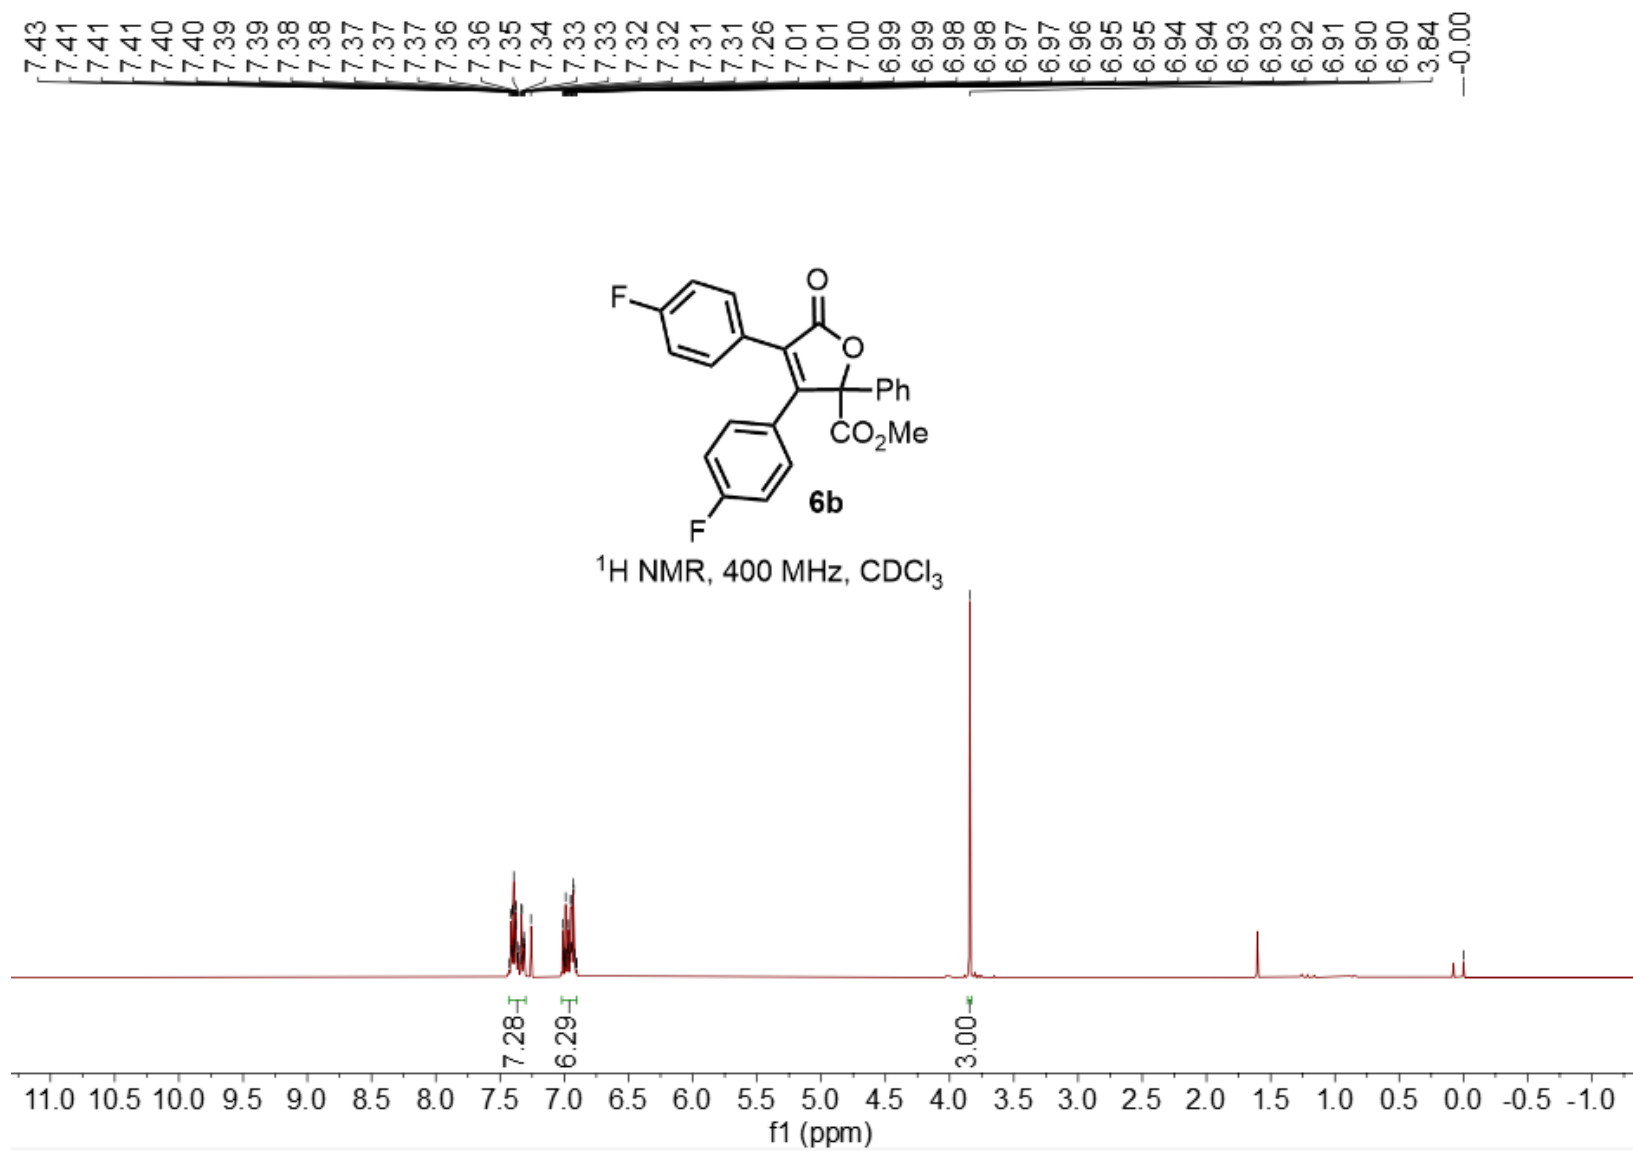

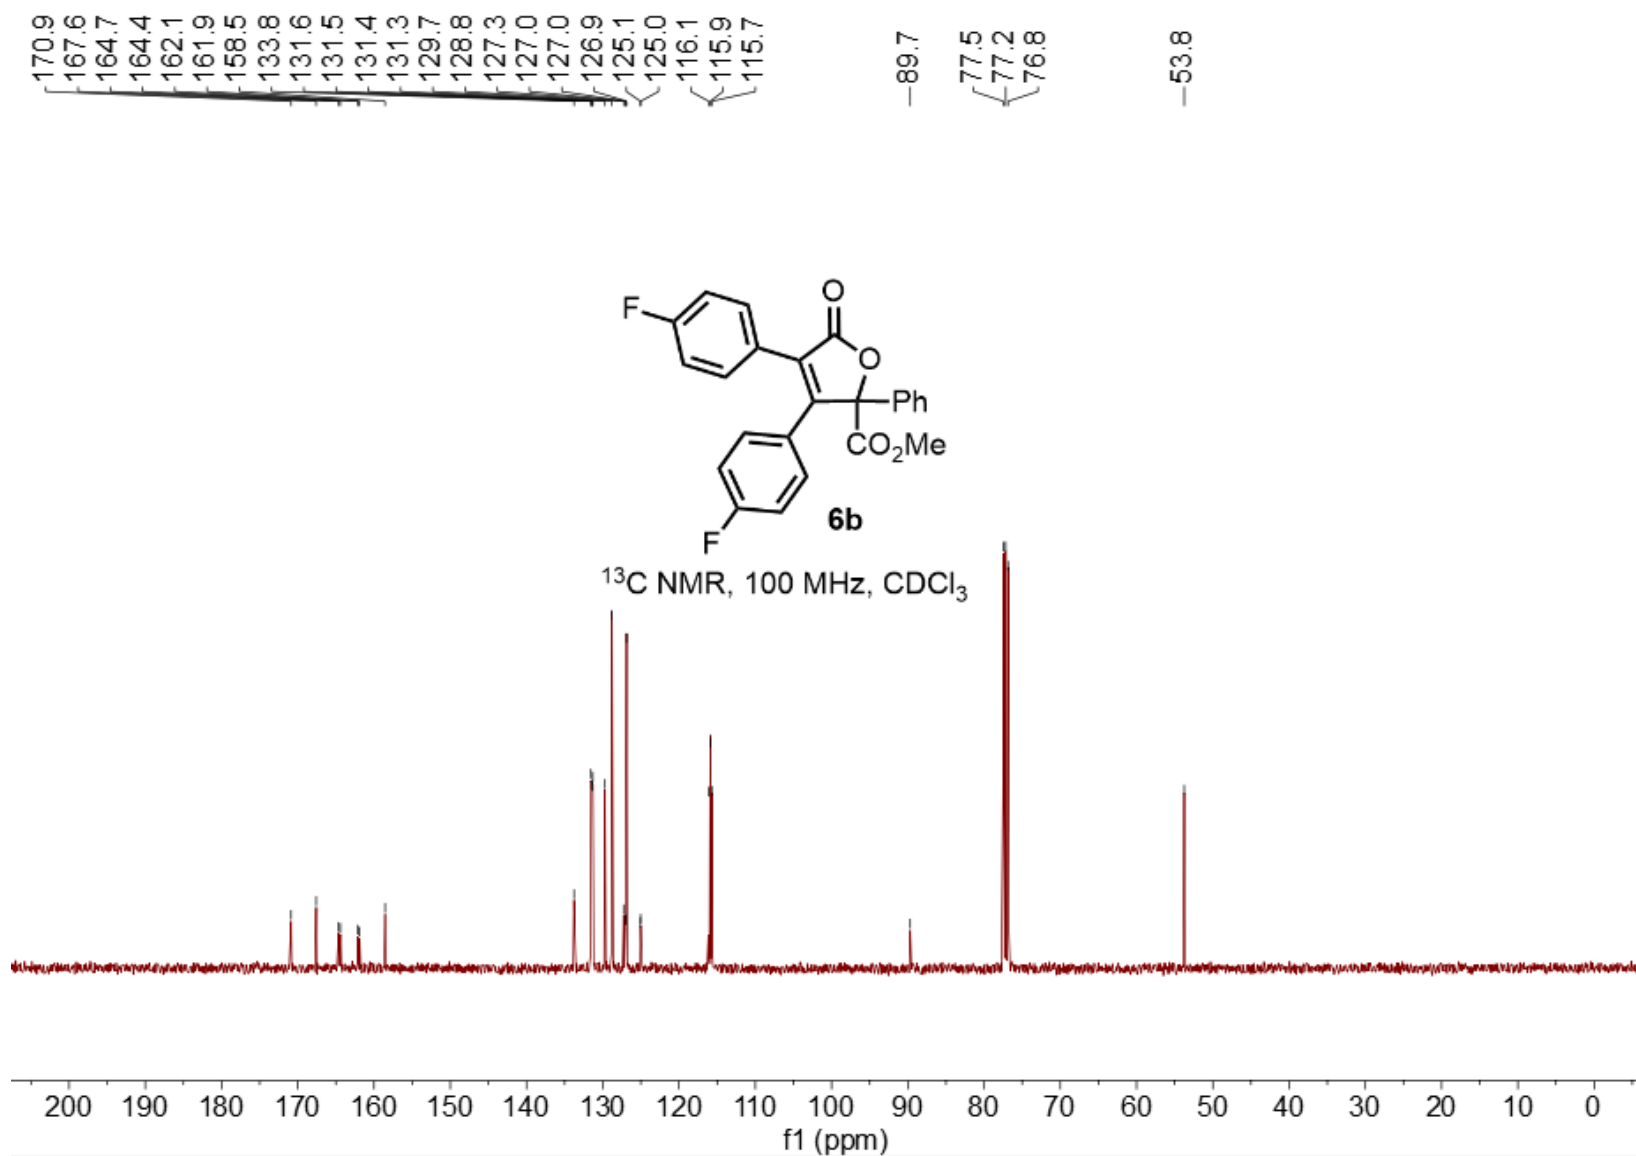

109.8  
110.7

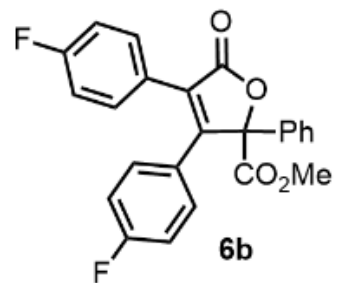

<sup>19</sup>F NMR, 376 MHz, CDCl<sub>3</sub>

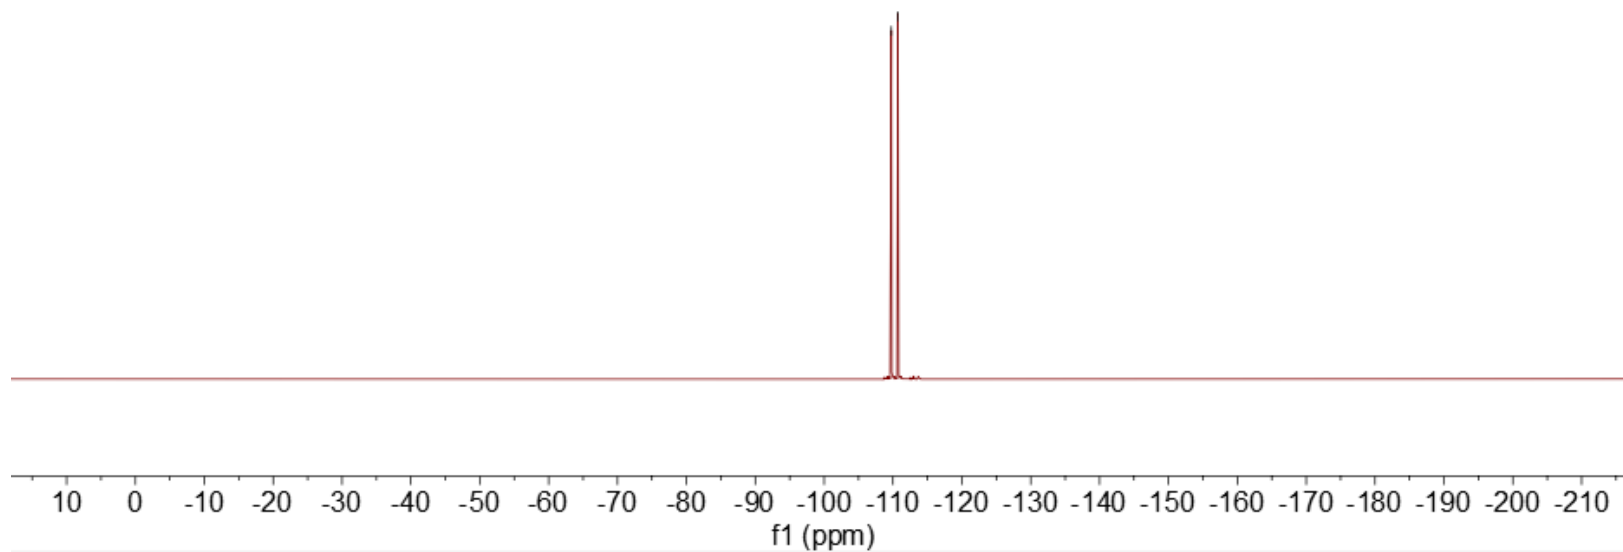

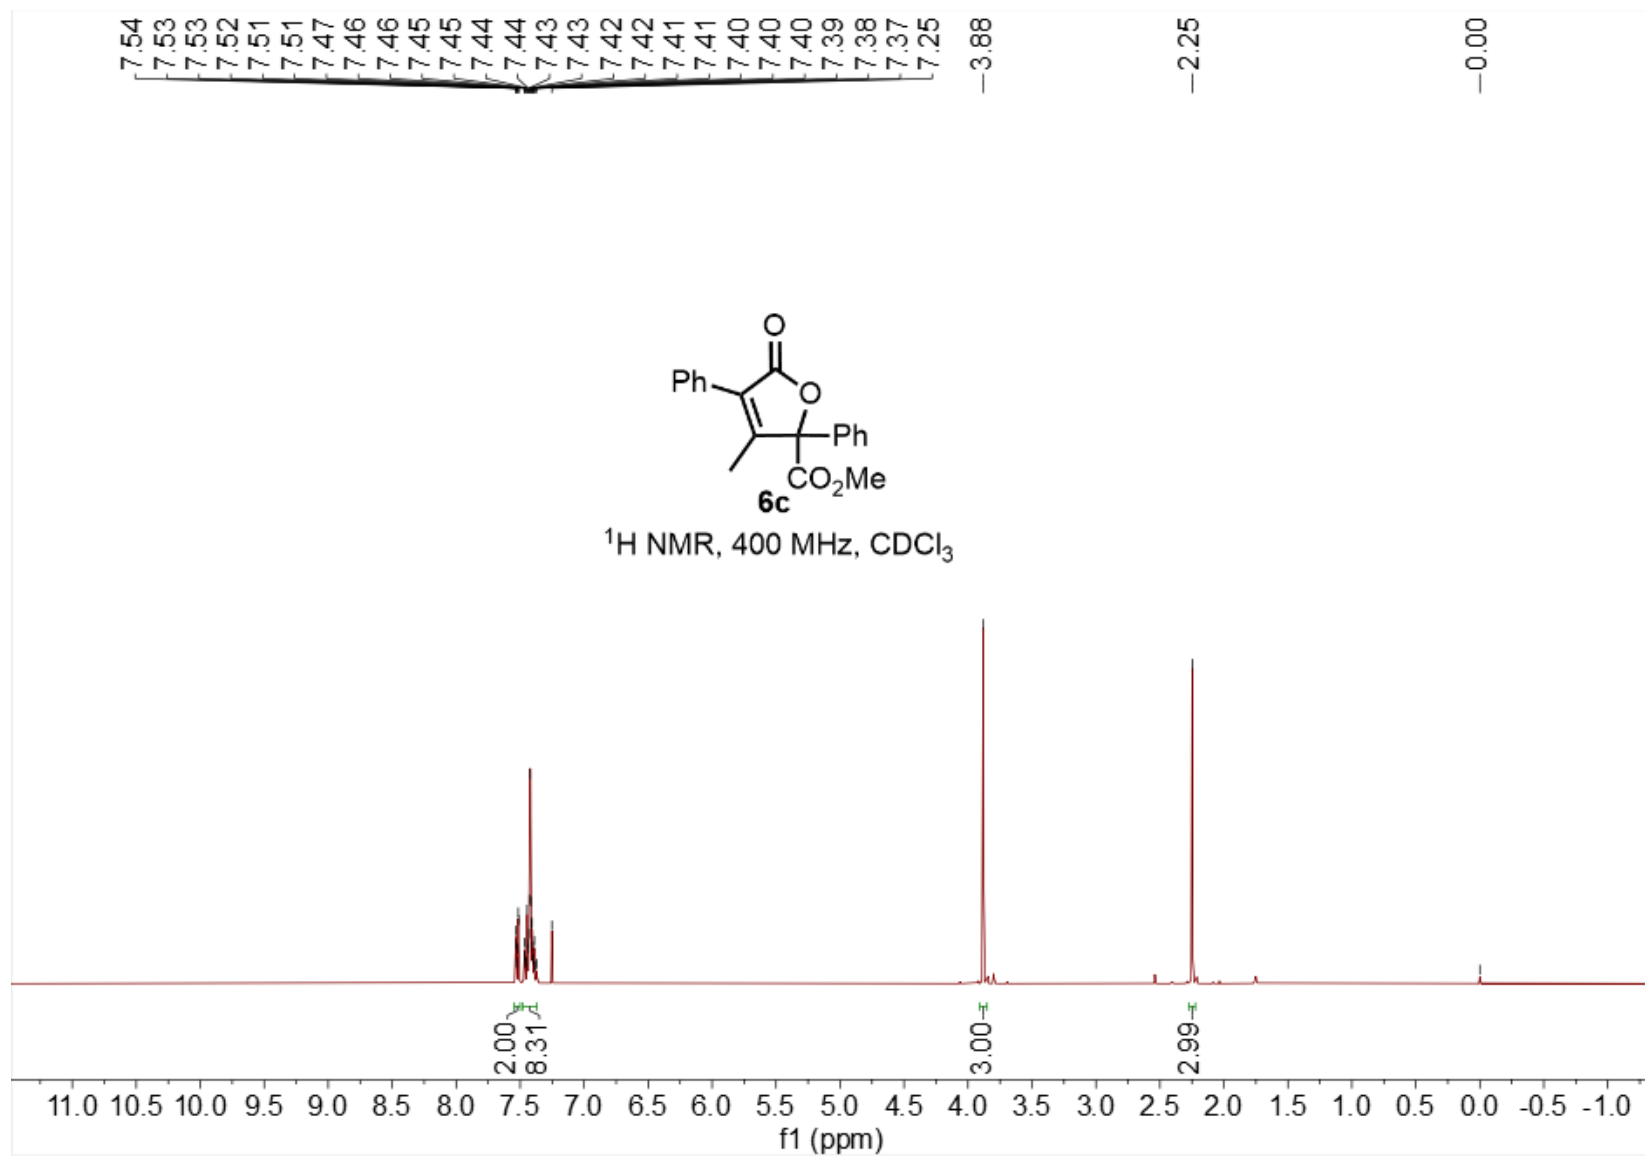

~171.2  
~167.9  
~159.6  
134.6  
129.5  
129.3  
129.2  
129.1  
129.0  
128.6  
127.5  
126.0  
-89.7  
77.5  
77.2  
76.8  
-53.6  
-13.8

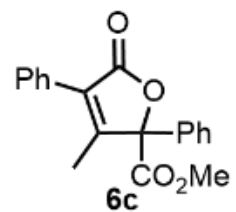

$^{13}\text{C}$  NMR, 100 MHz,  $\text{CDCl}_3$

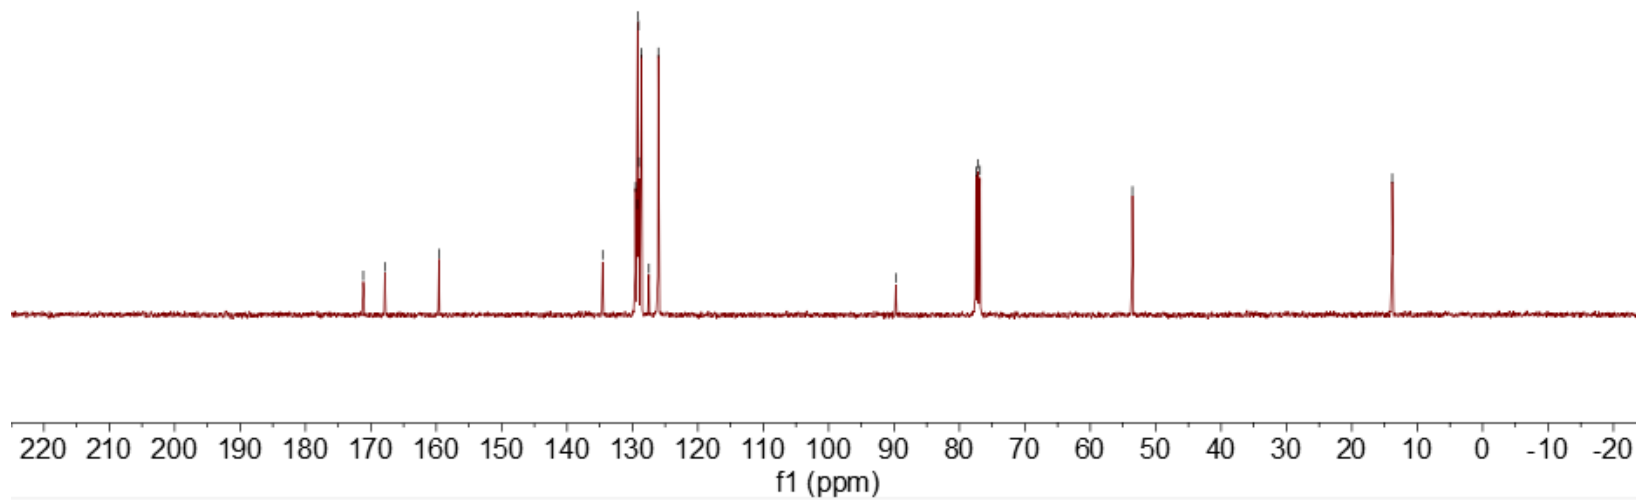

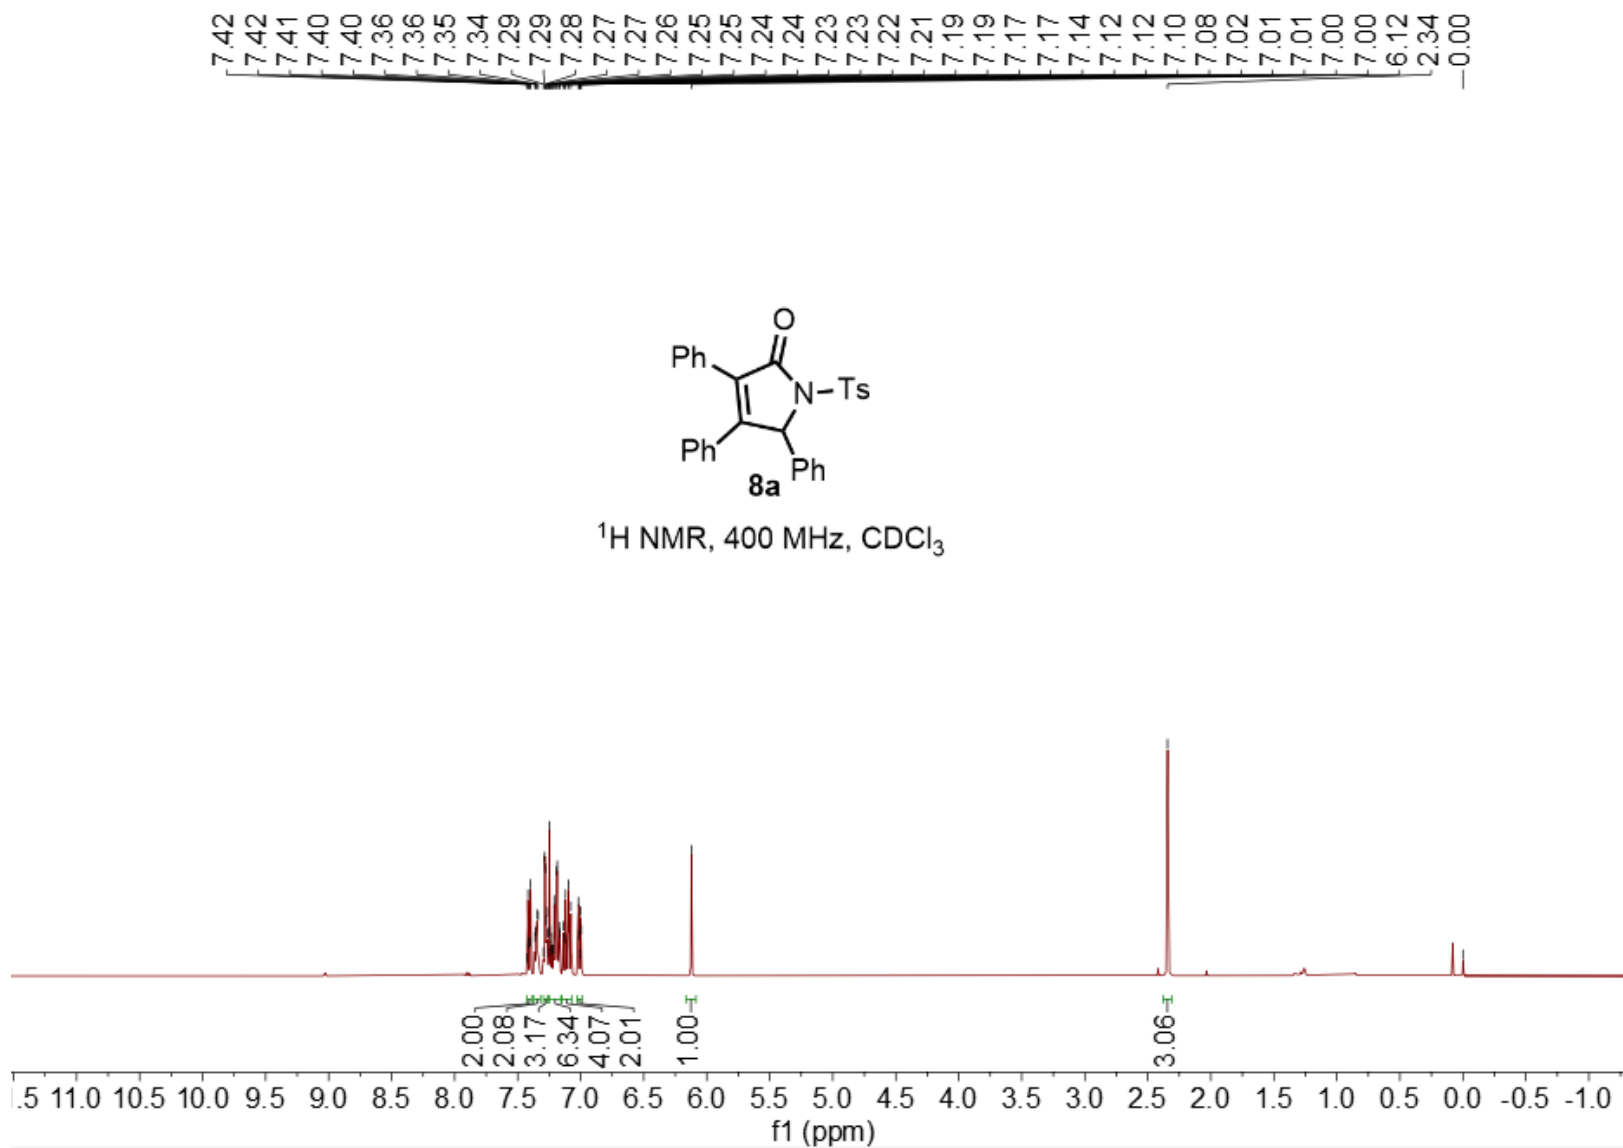

7.41  
7.40  
7.39  
7.39  
7.36  
7.35  
7.34  
7.33  
7.33  
7.32  
7.29  
7.28  
7.28  
7.27  
7.26  
7.26  
7.24  
7.23  
7.22  
7.21  
7.21  
7.20  
7.18  
7.17  
7.17  
7.16  
7.15  
7.15  
7.11  
7.09  
7.02  
7.01  
7.00  
7.00  
6.99  
6.98  
6.98  
6.97  
6.97  
6.87  
6.86  
6.86  
6.85  
6.84  
6.83  
6.82  
6.82  
6.81  
6.10  
2.35  
0.00

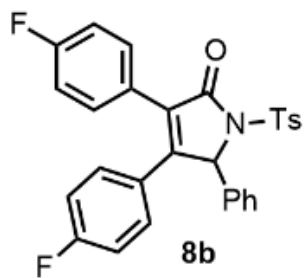

<sup>1</sup>H NMR, 400 MHz, CDCl<sub>3</sub>

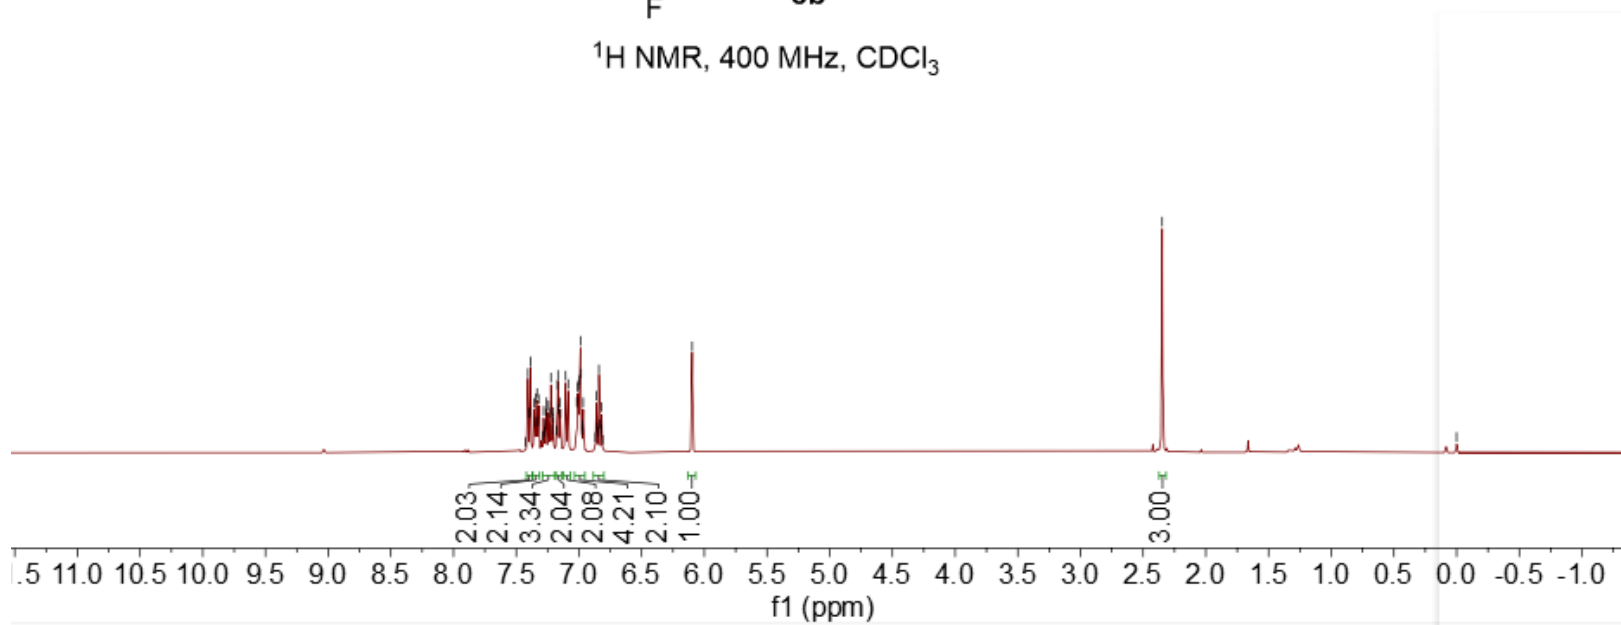

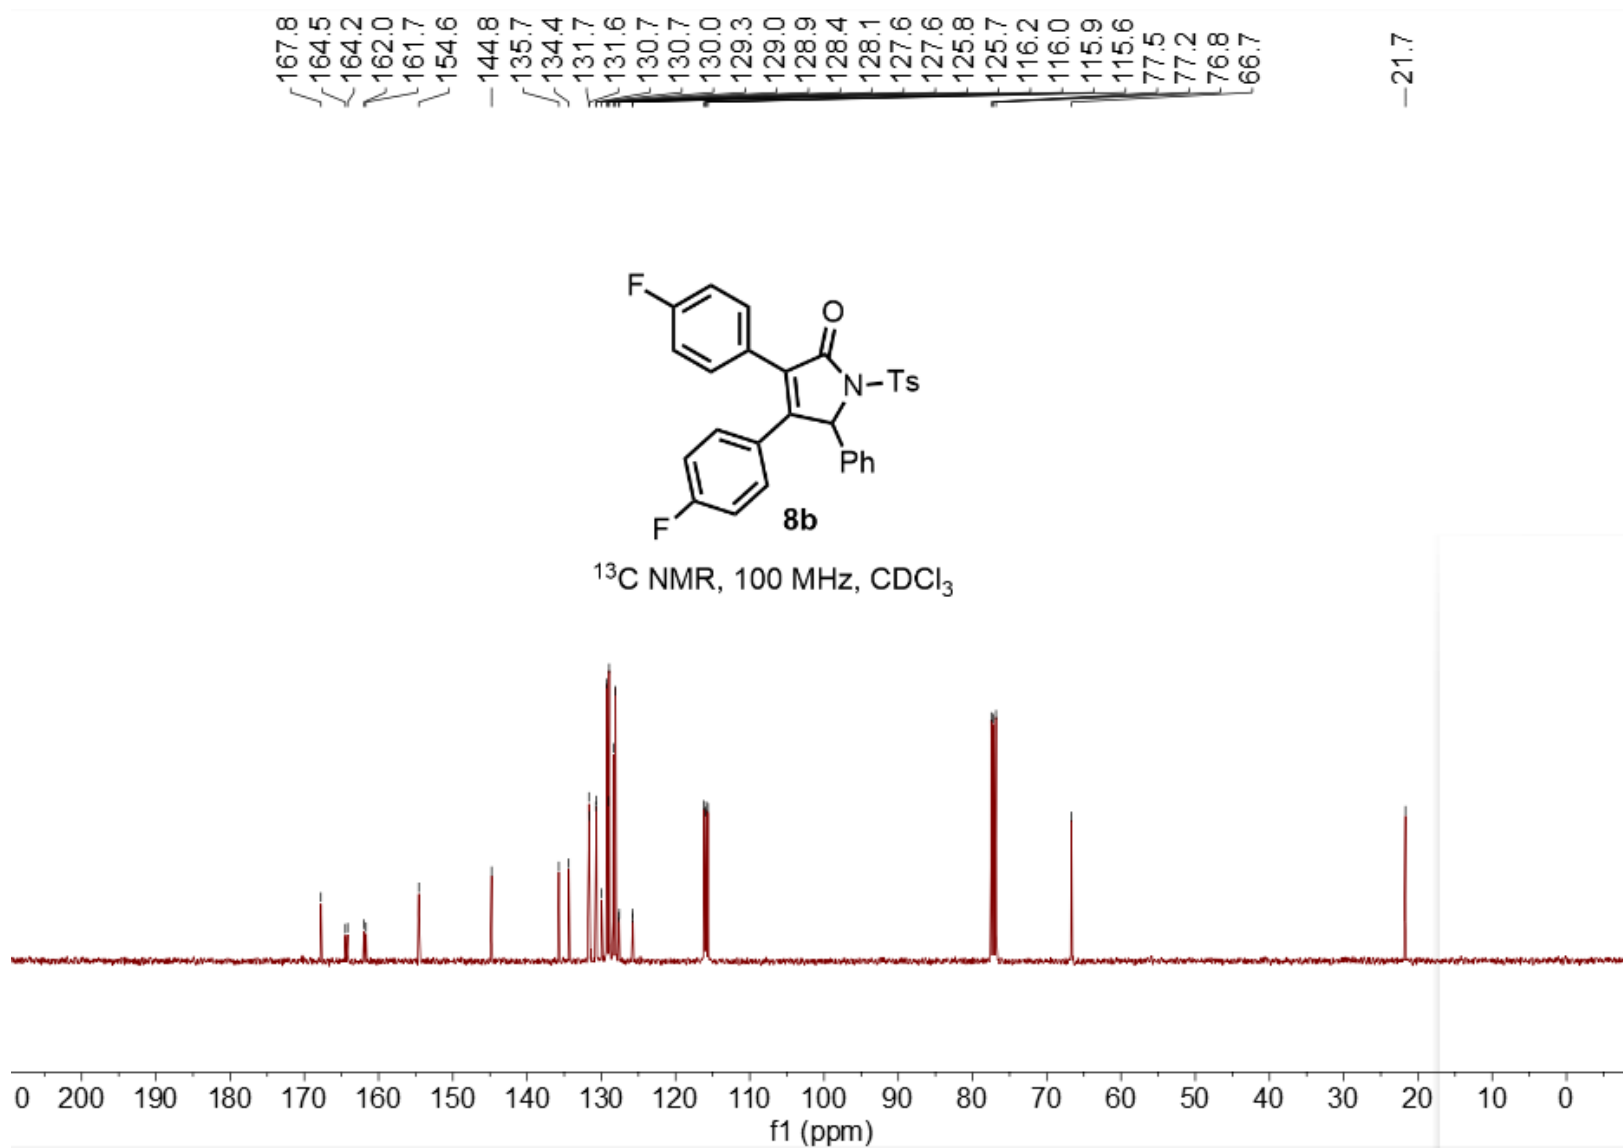



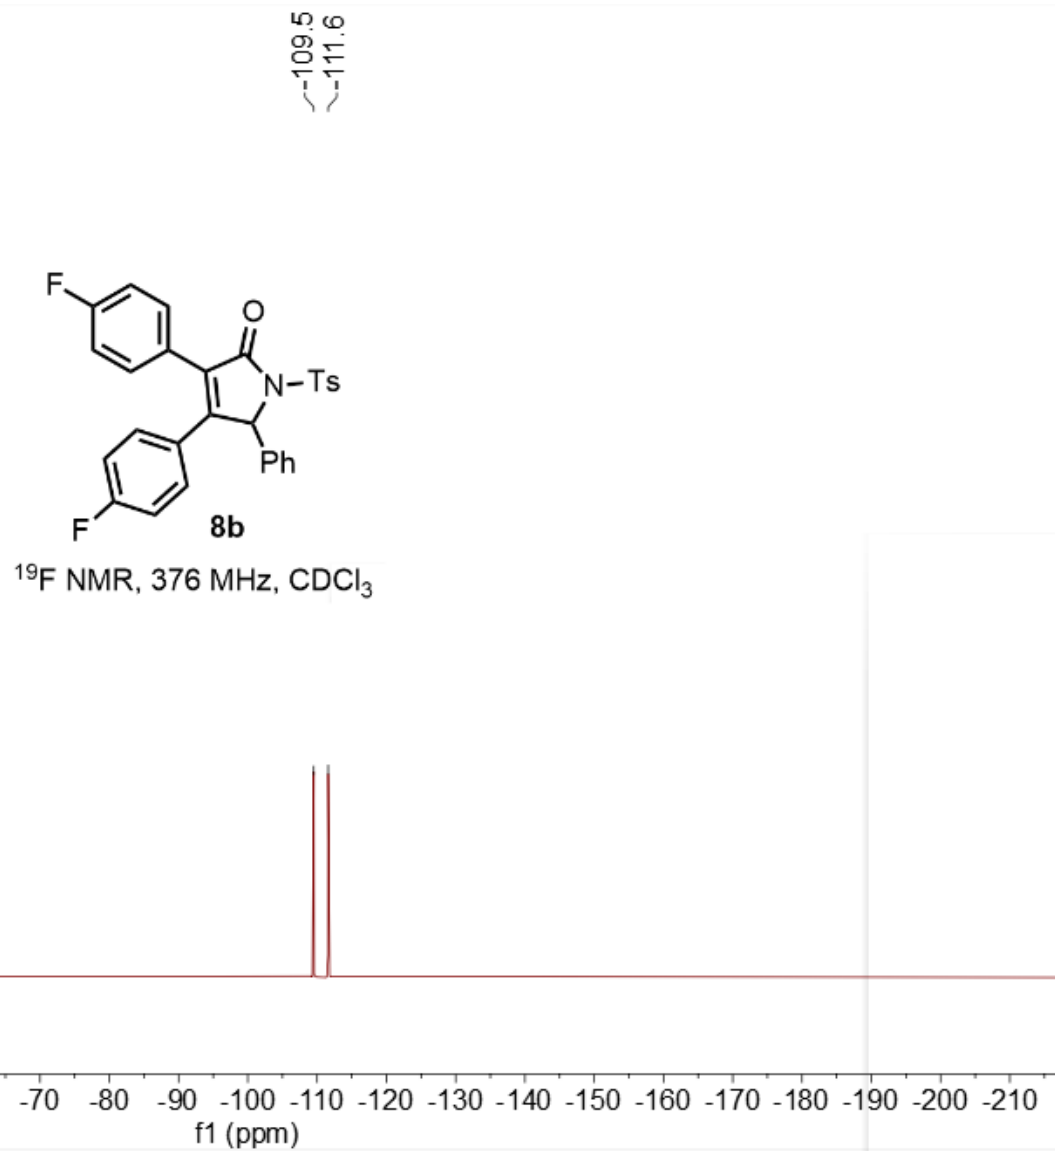

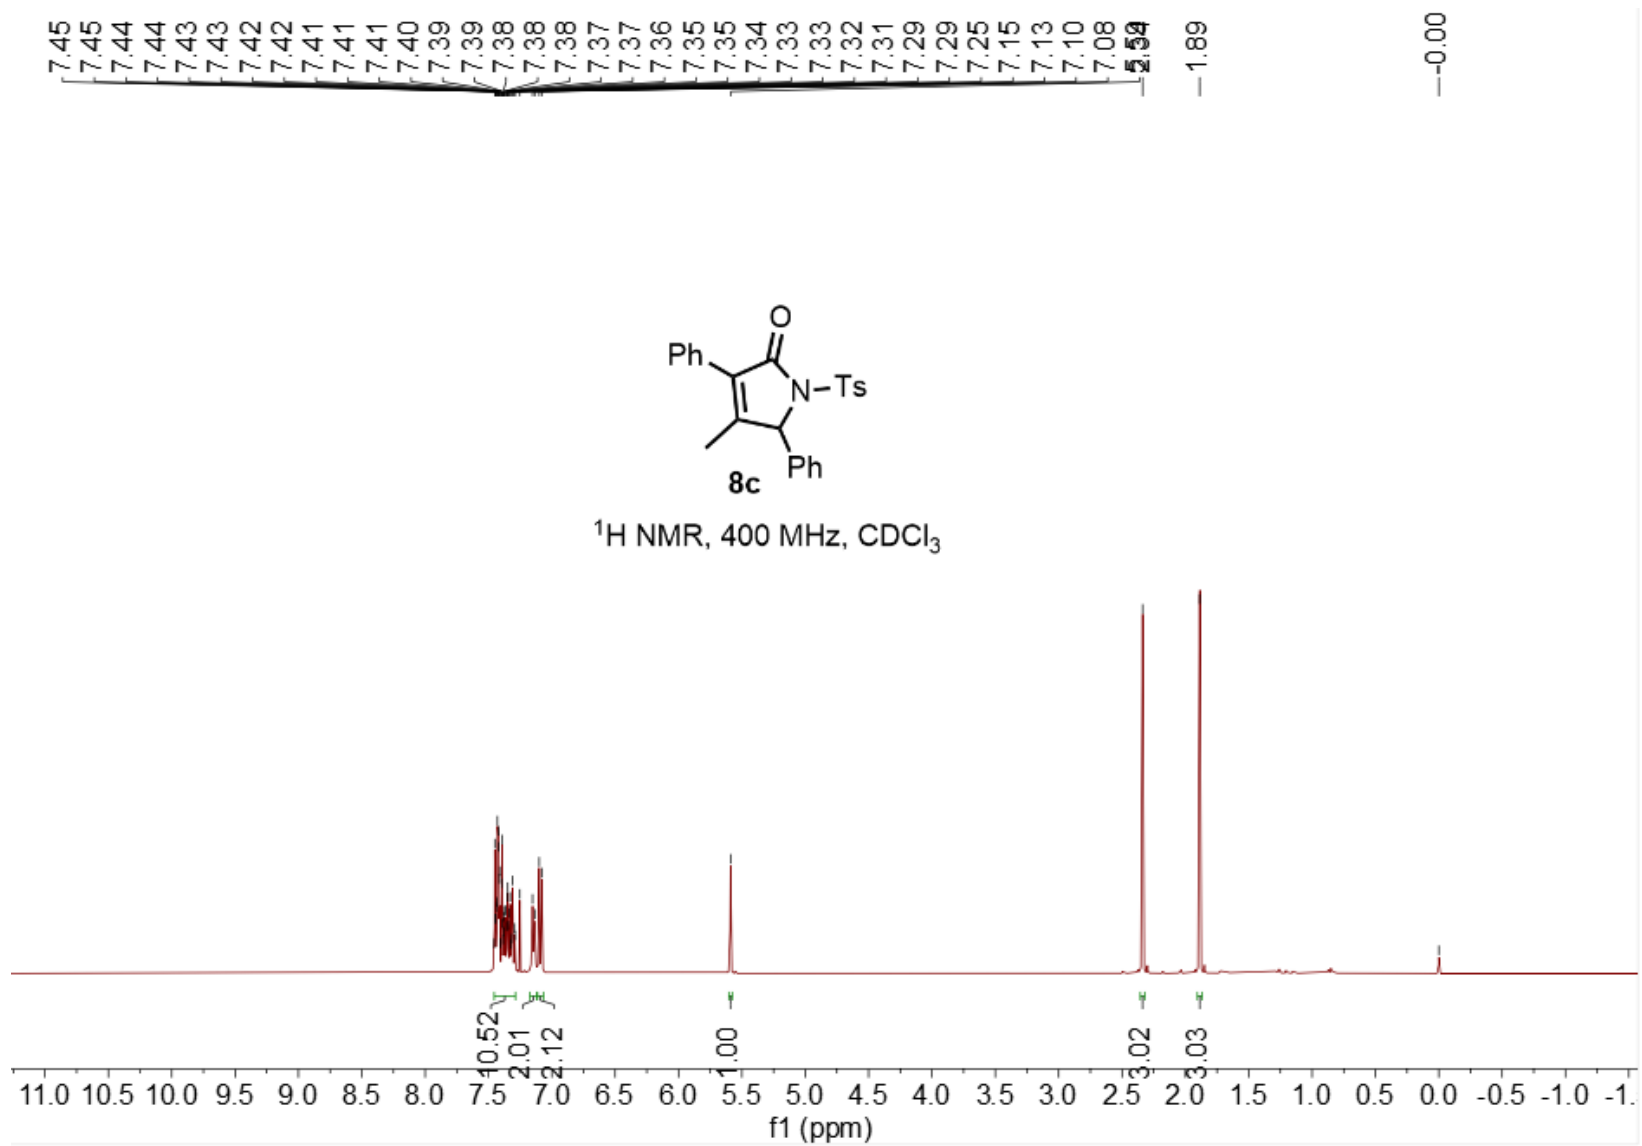

-168.3  
-156.2  
-144.6  
135.9  
134.9  
130.7  
129.8  
129.3  
129.2  
129.0  
128.6  
128.4  
128.1  
128.0

77.5  
77.2  
76.8  
68.1

-21.7  
-14.0

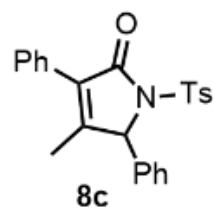

<sup>13</sup>C NMR, 100 MHz, CDCl<sub>3</sub>

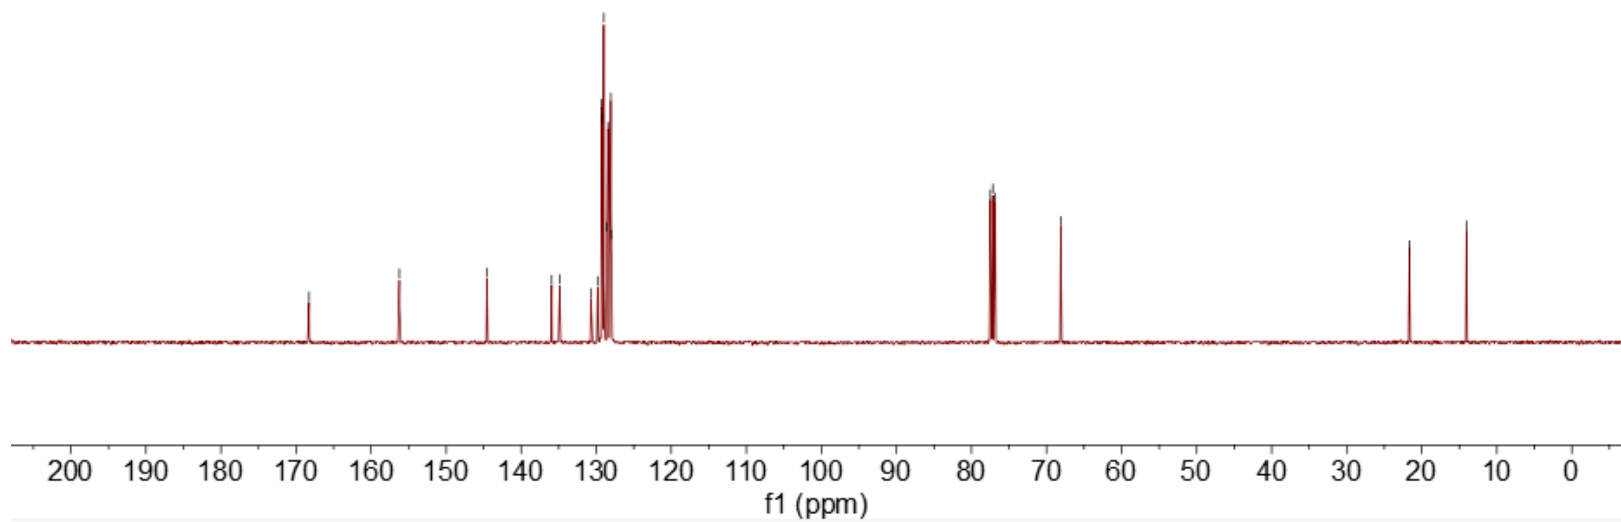

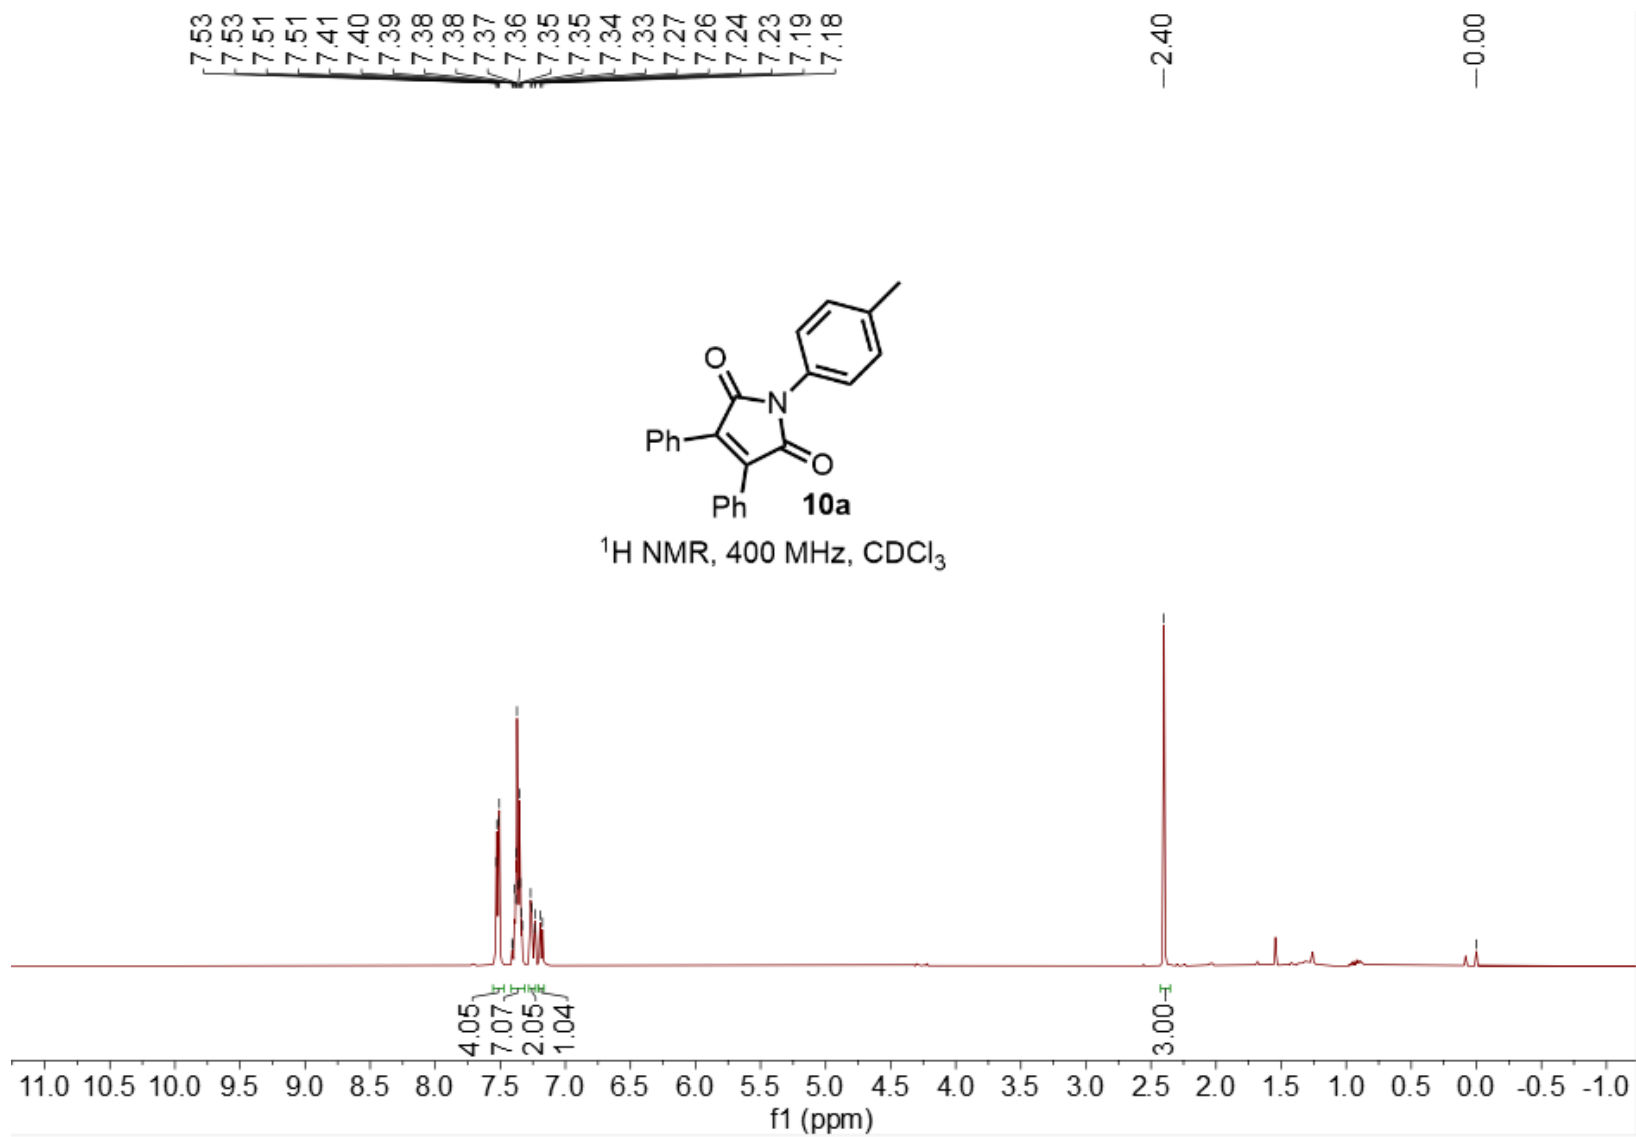

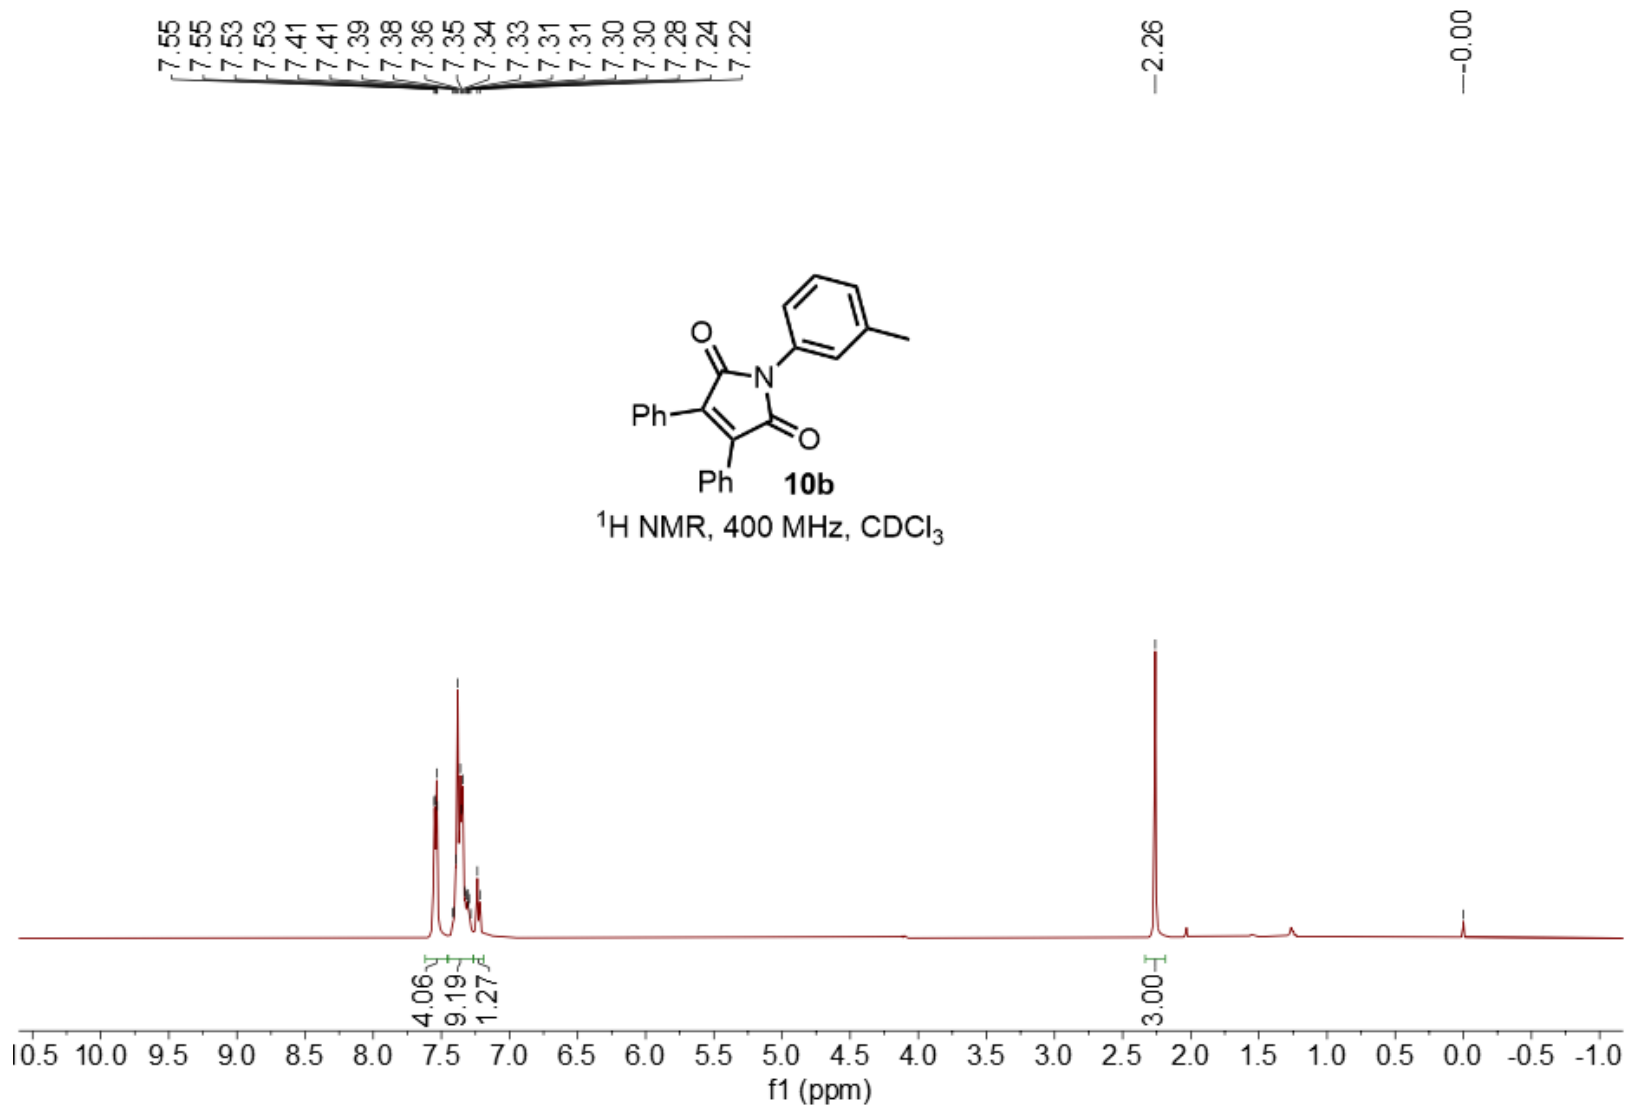

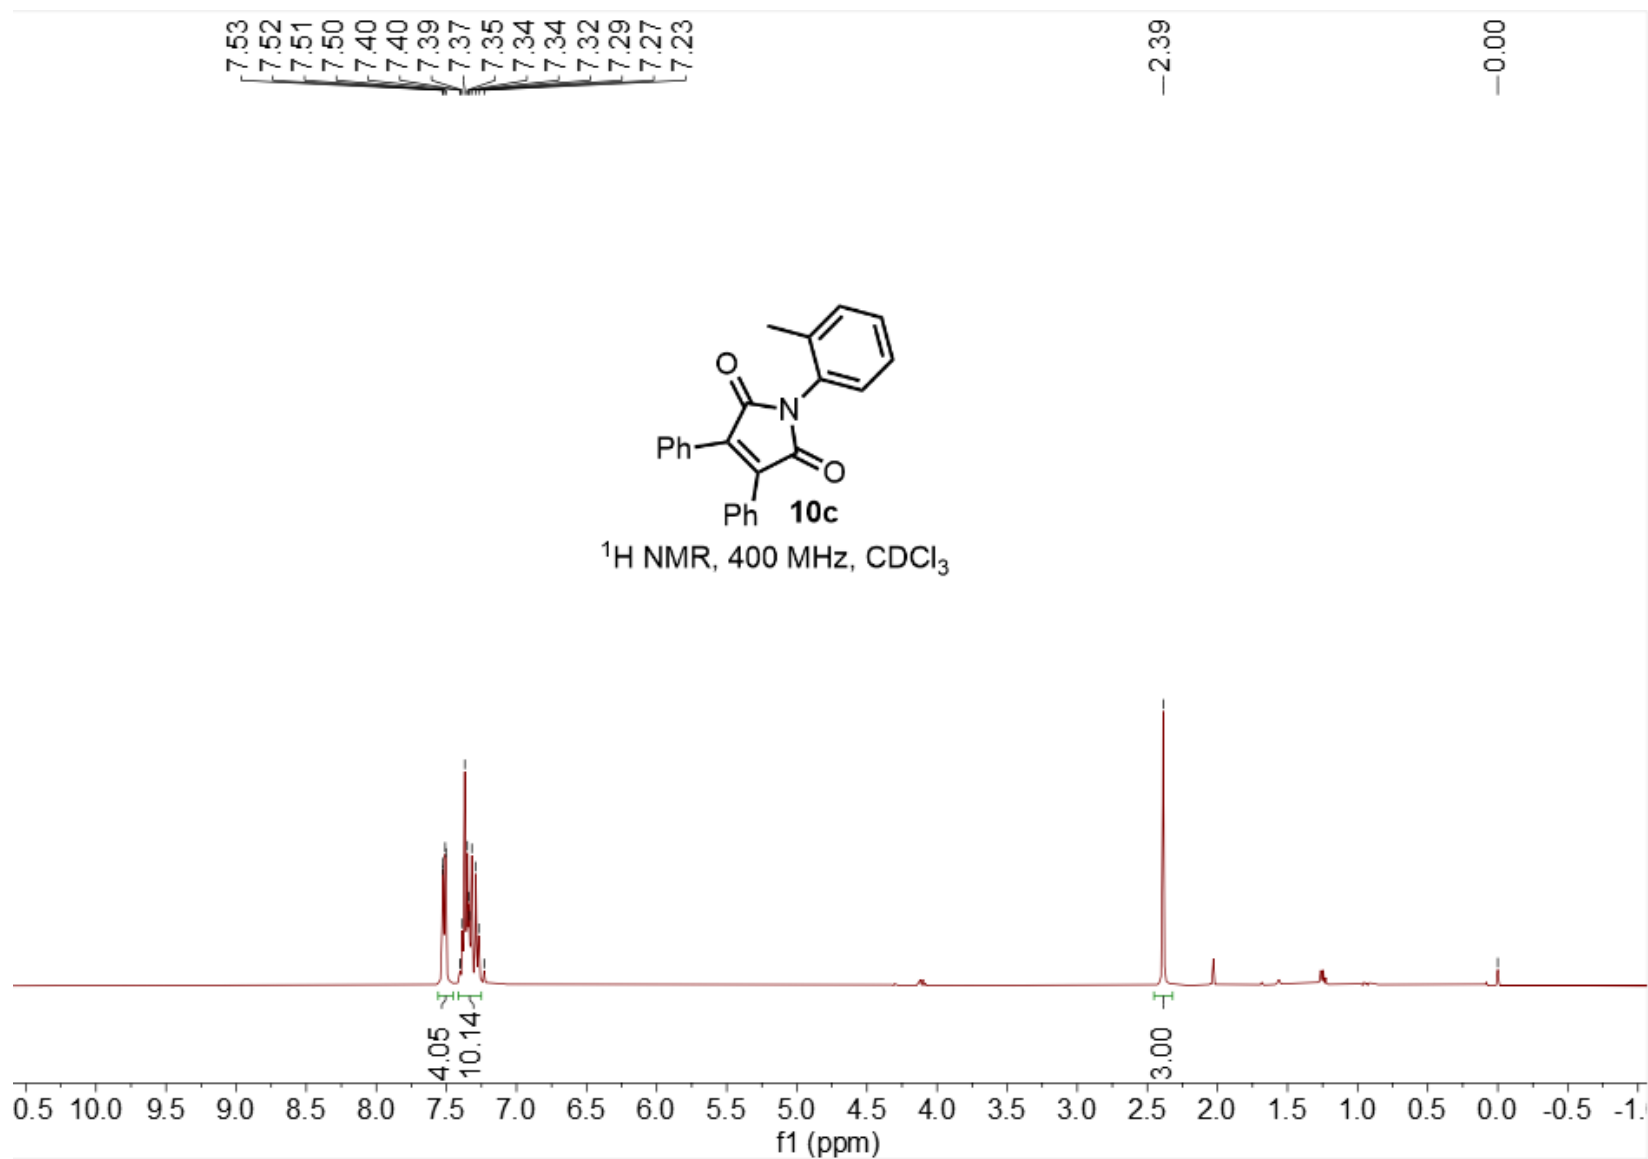

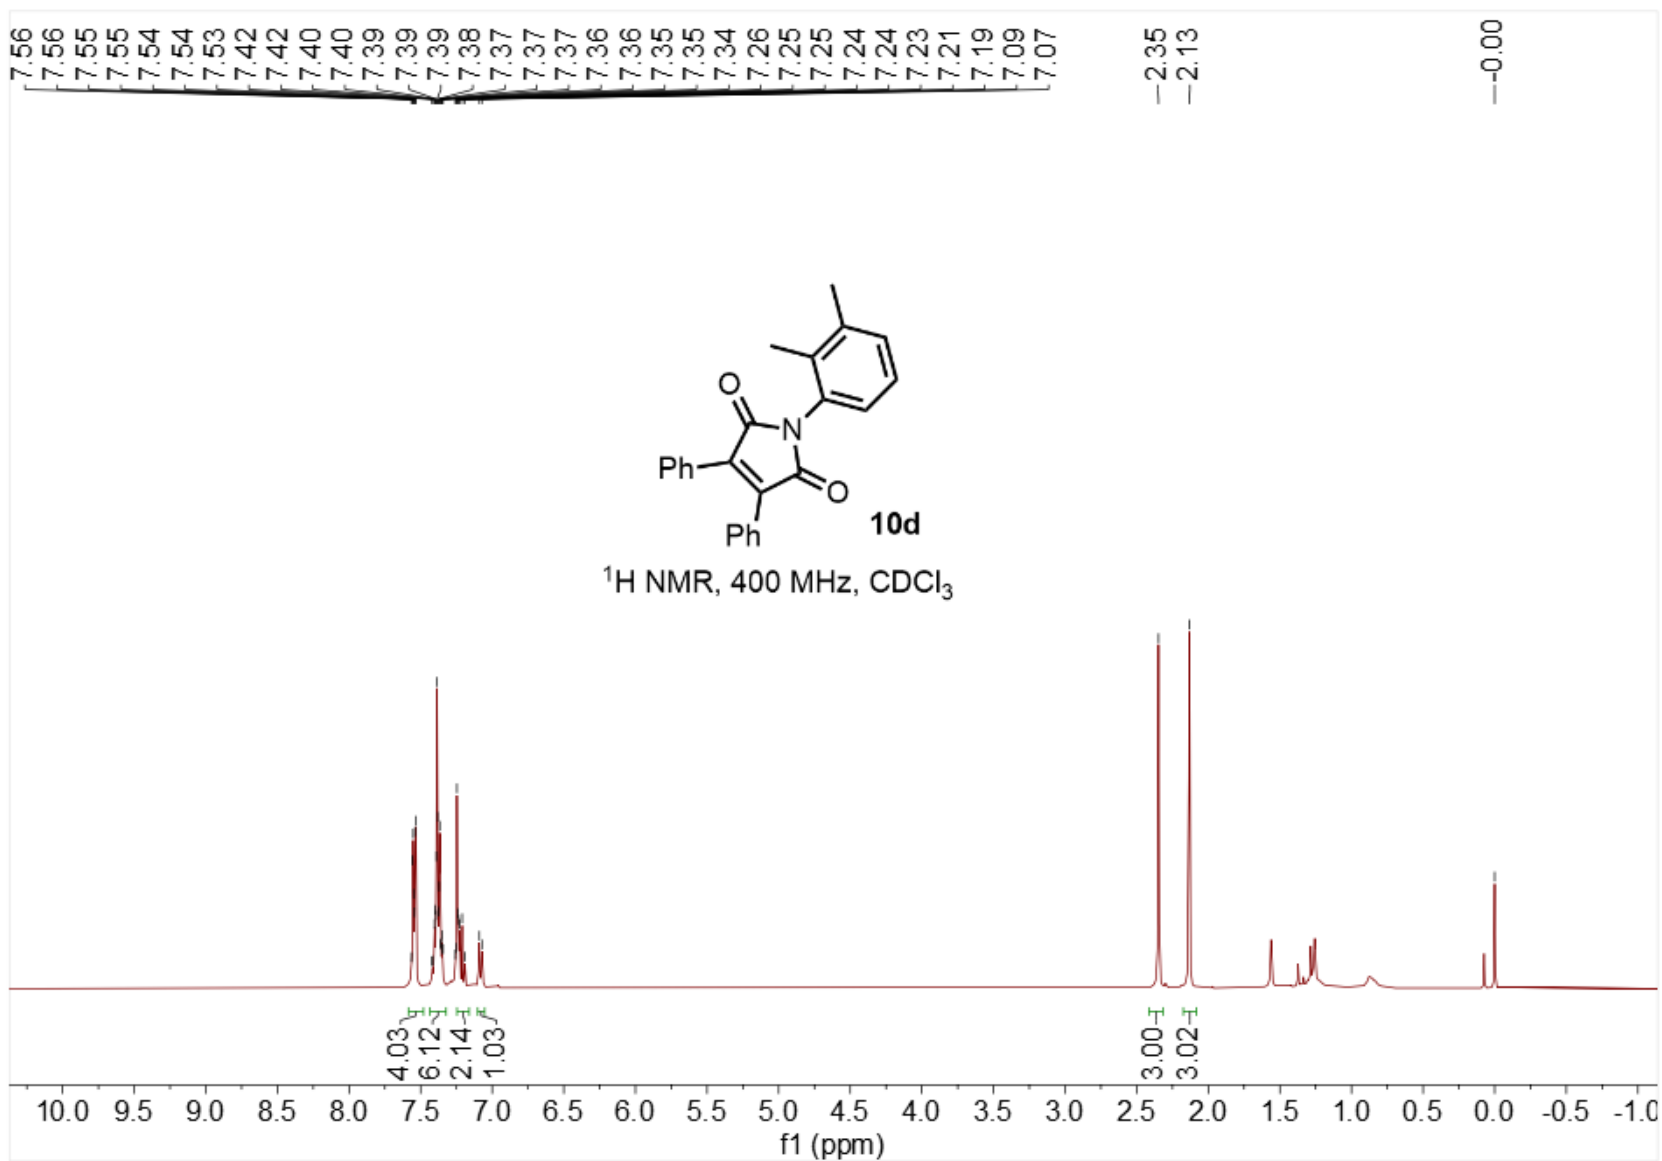

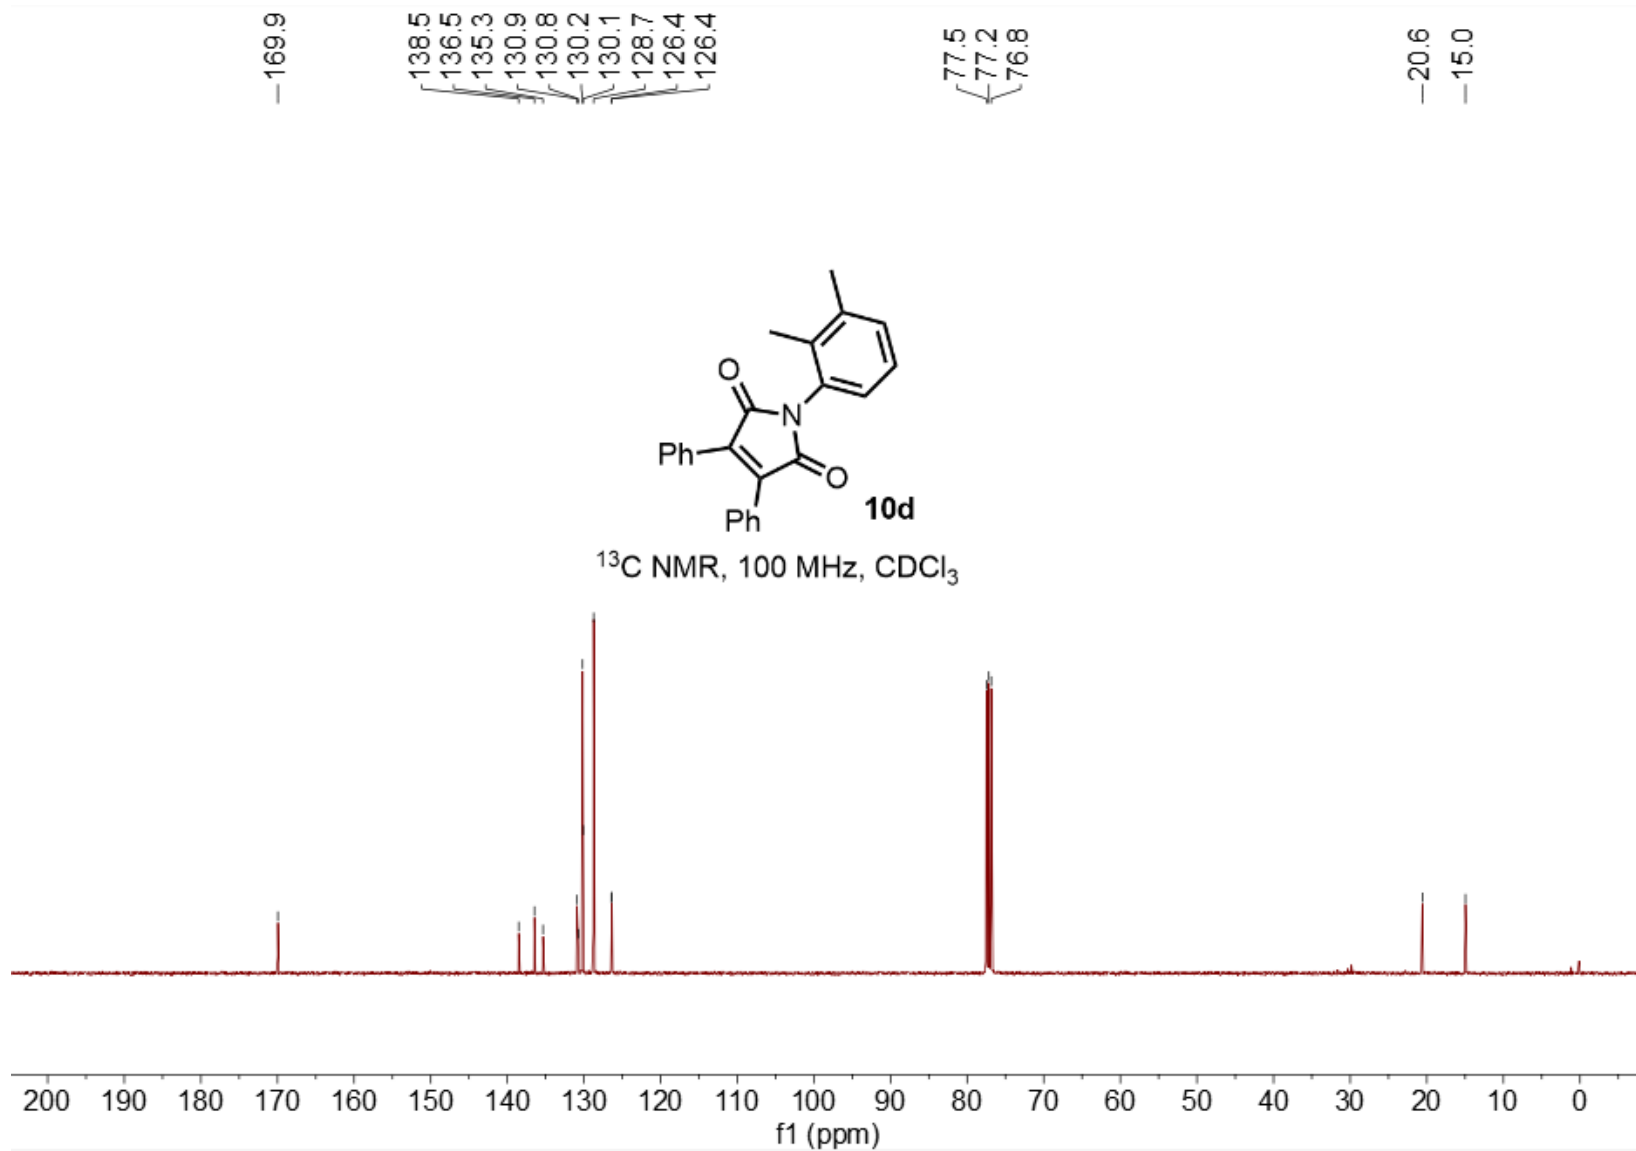



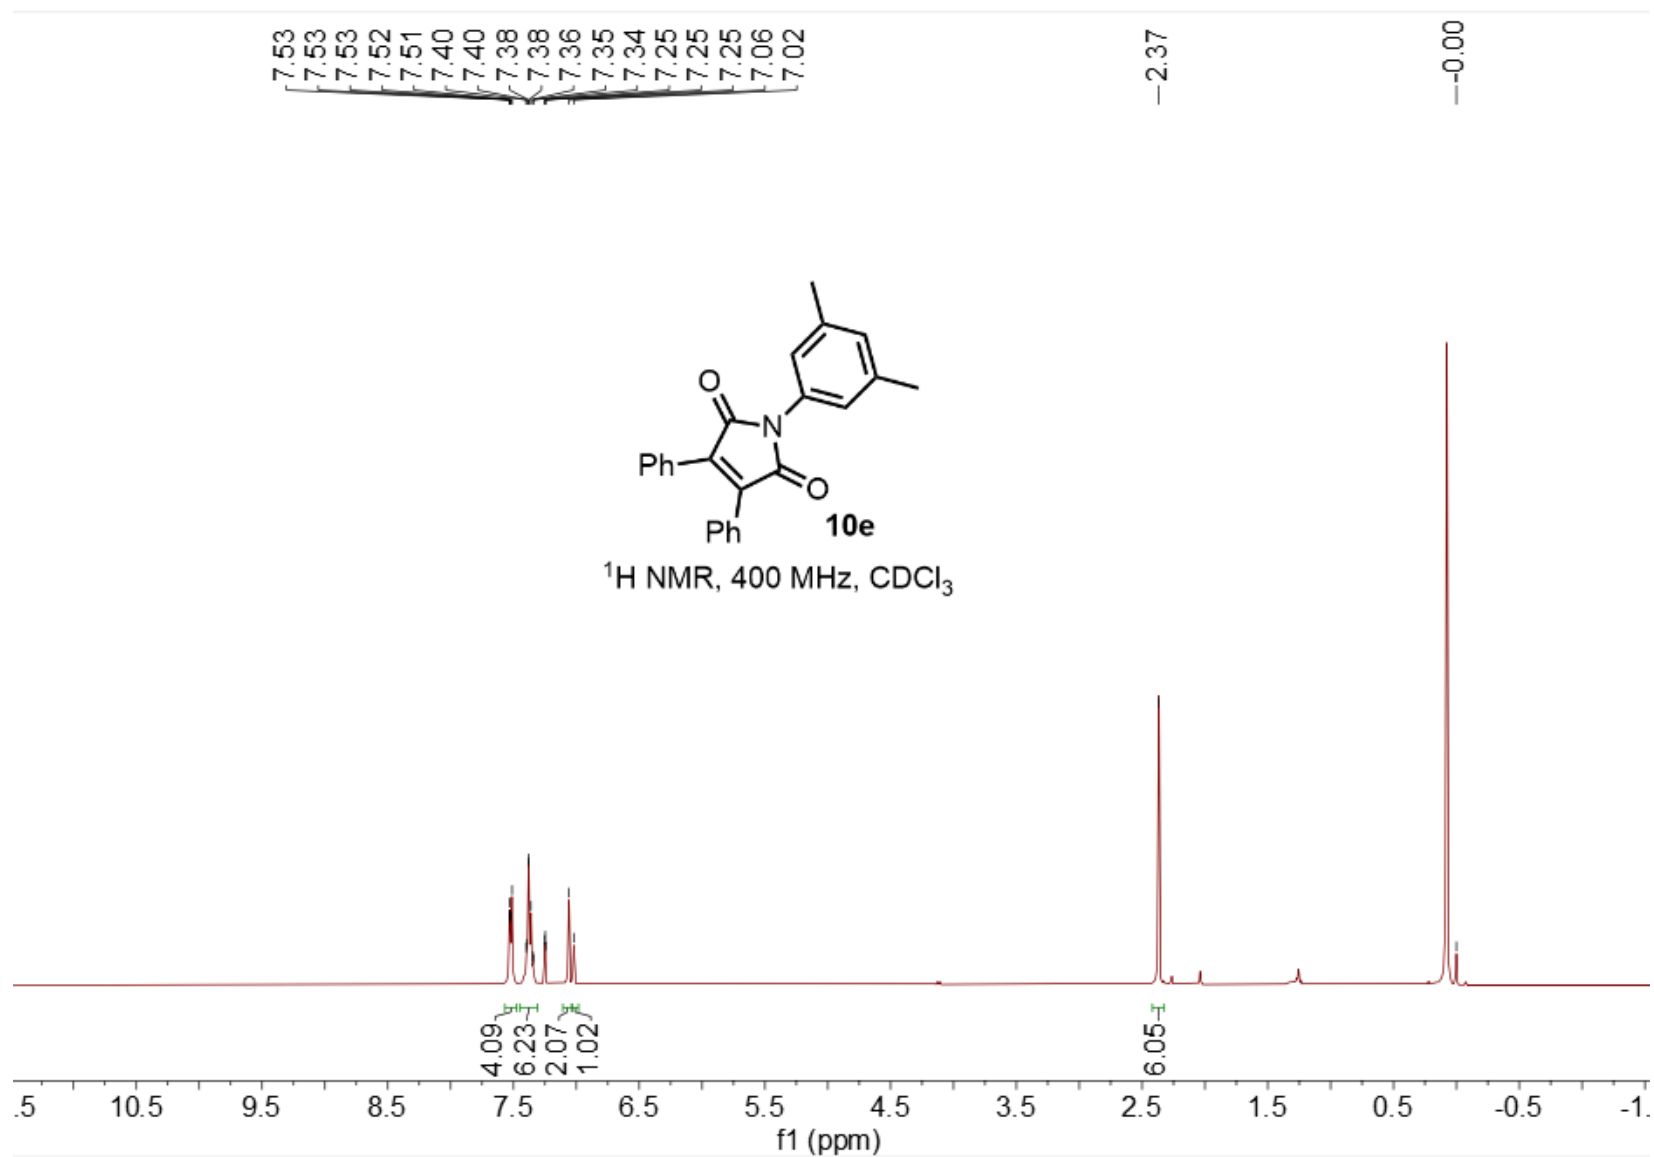

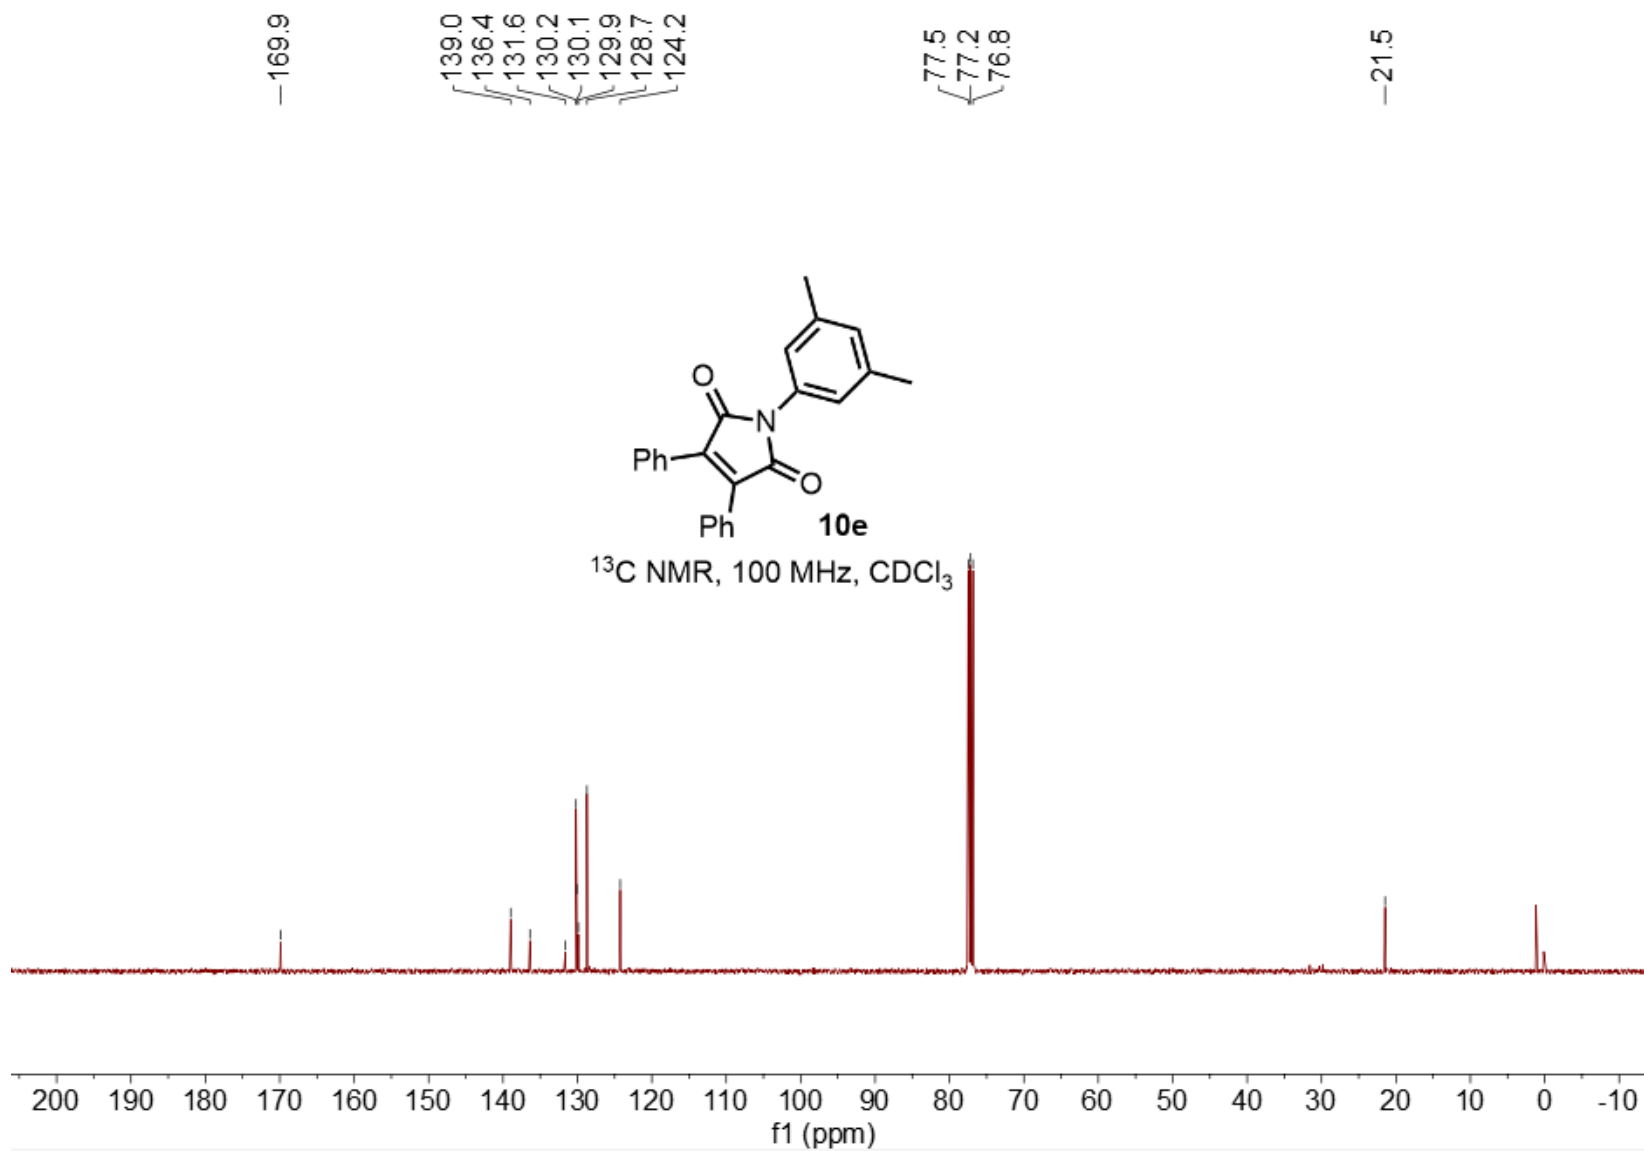

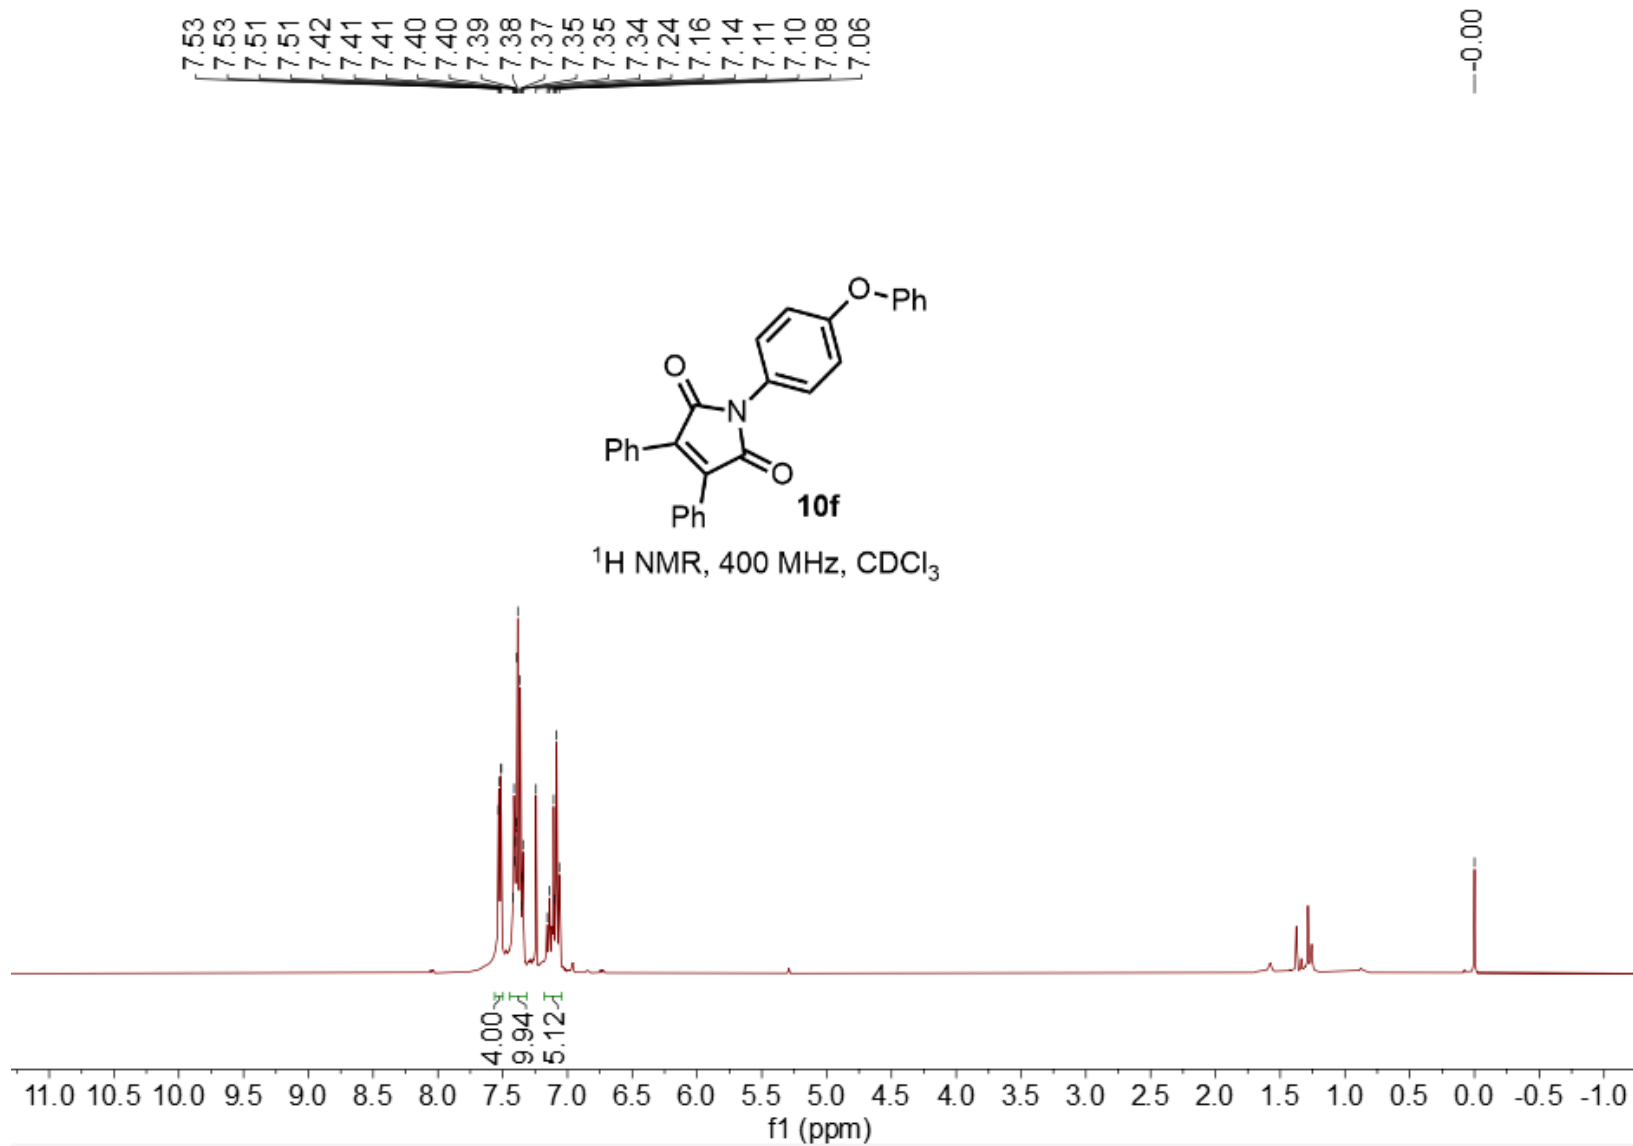

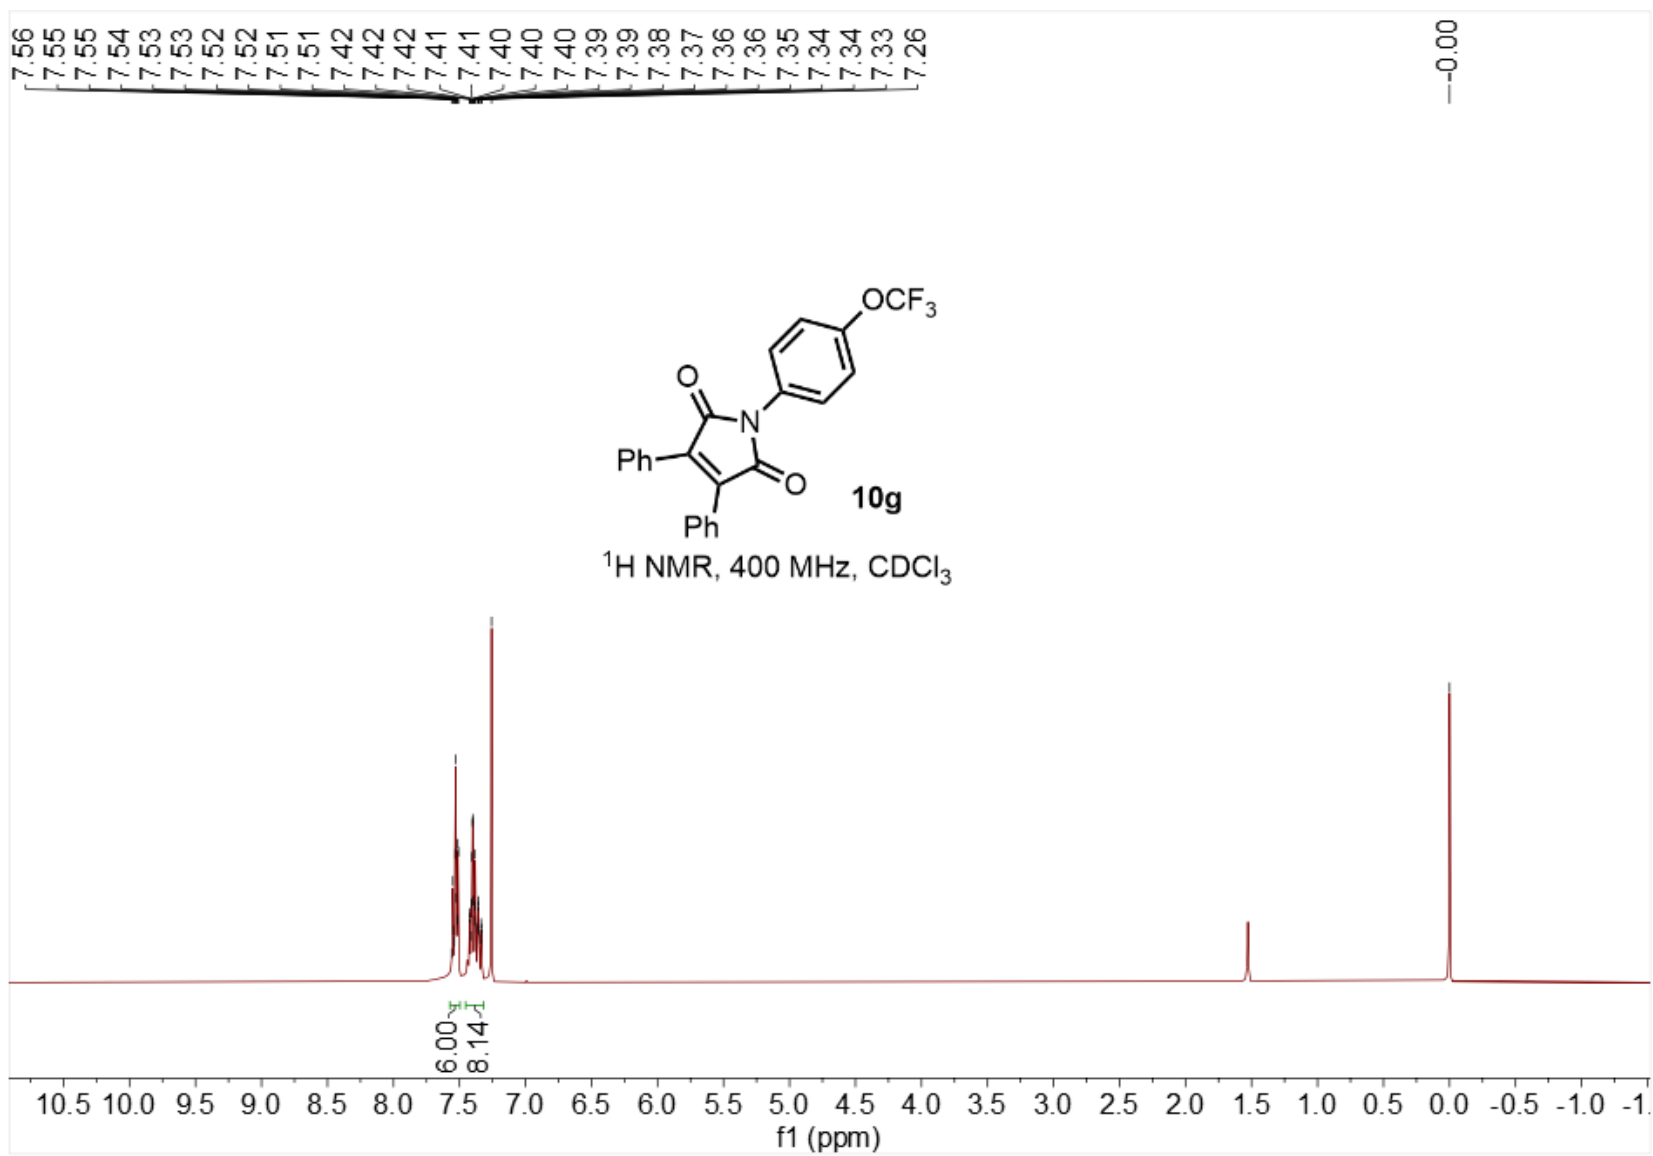

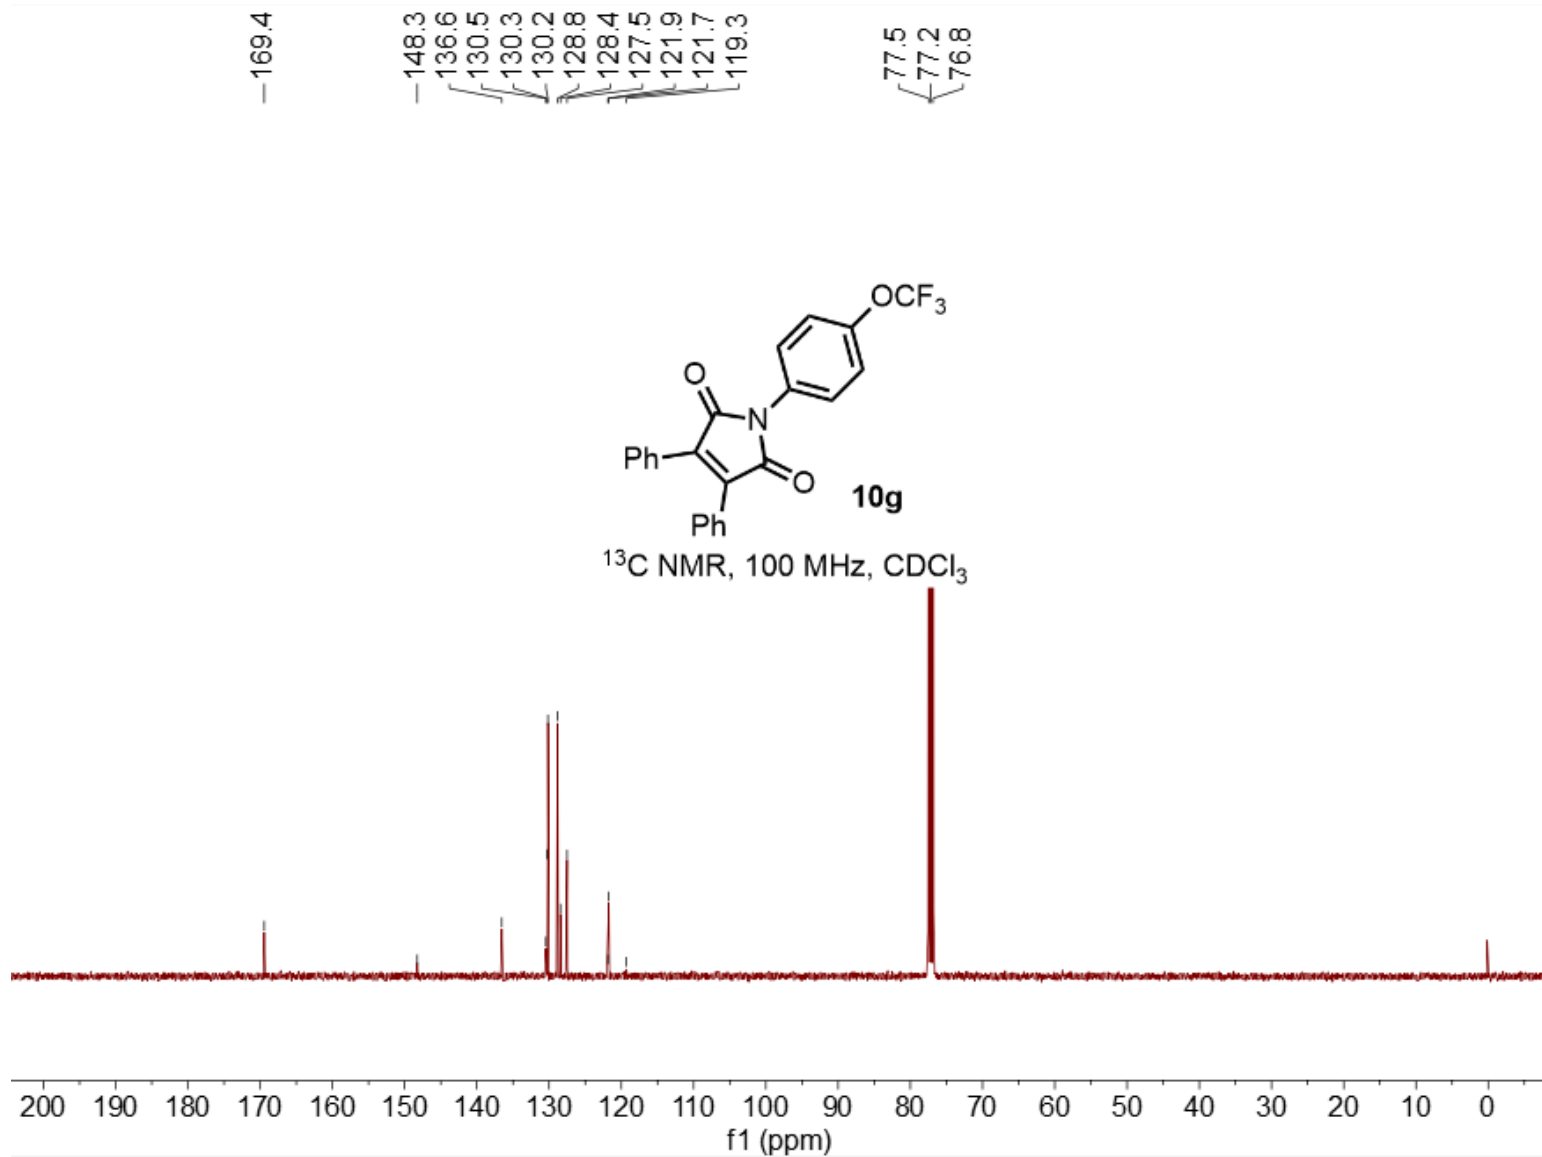

--57.8

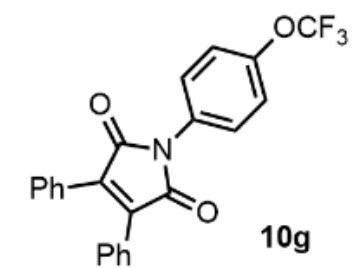

$^{19}\text{F}$  NMR, 376 MHz,  $\text{CDCl}_3$

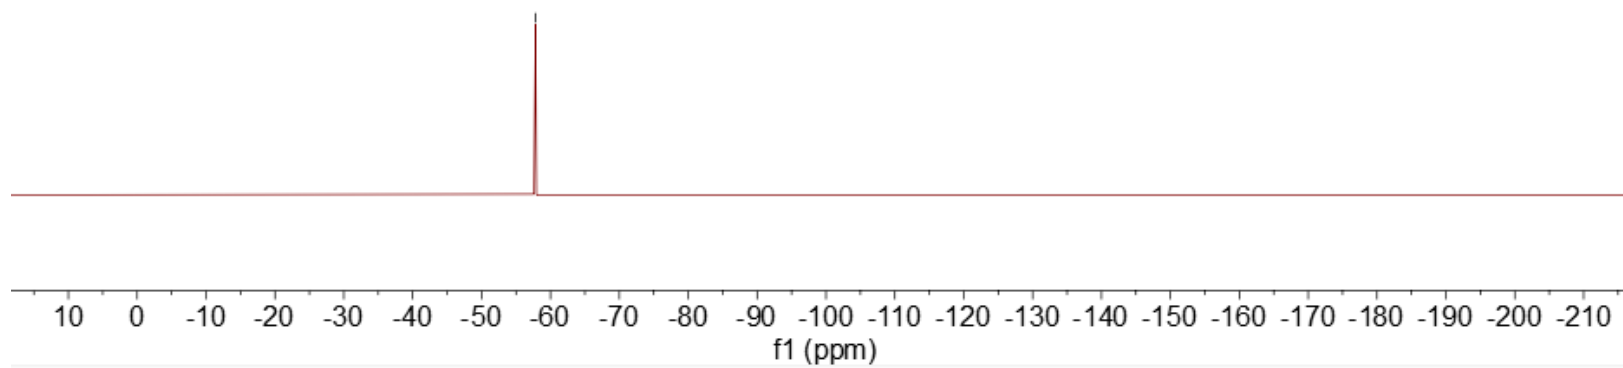

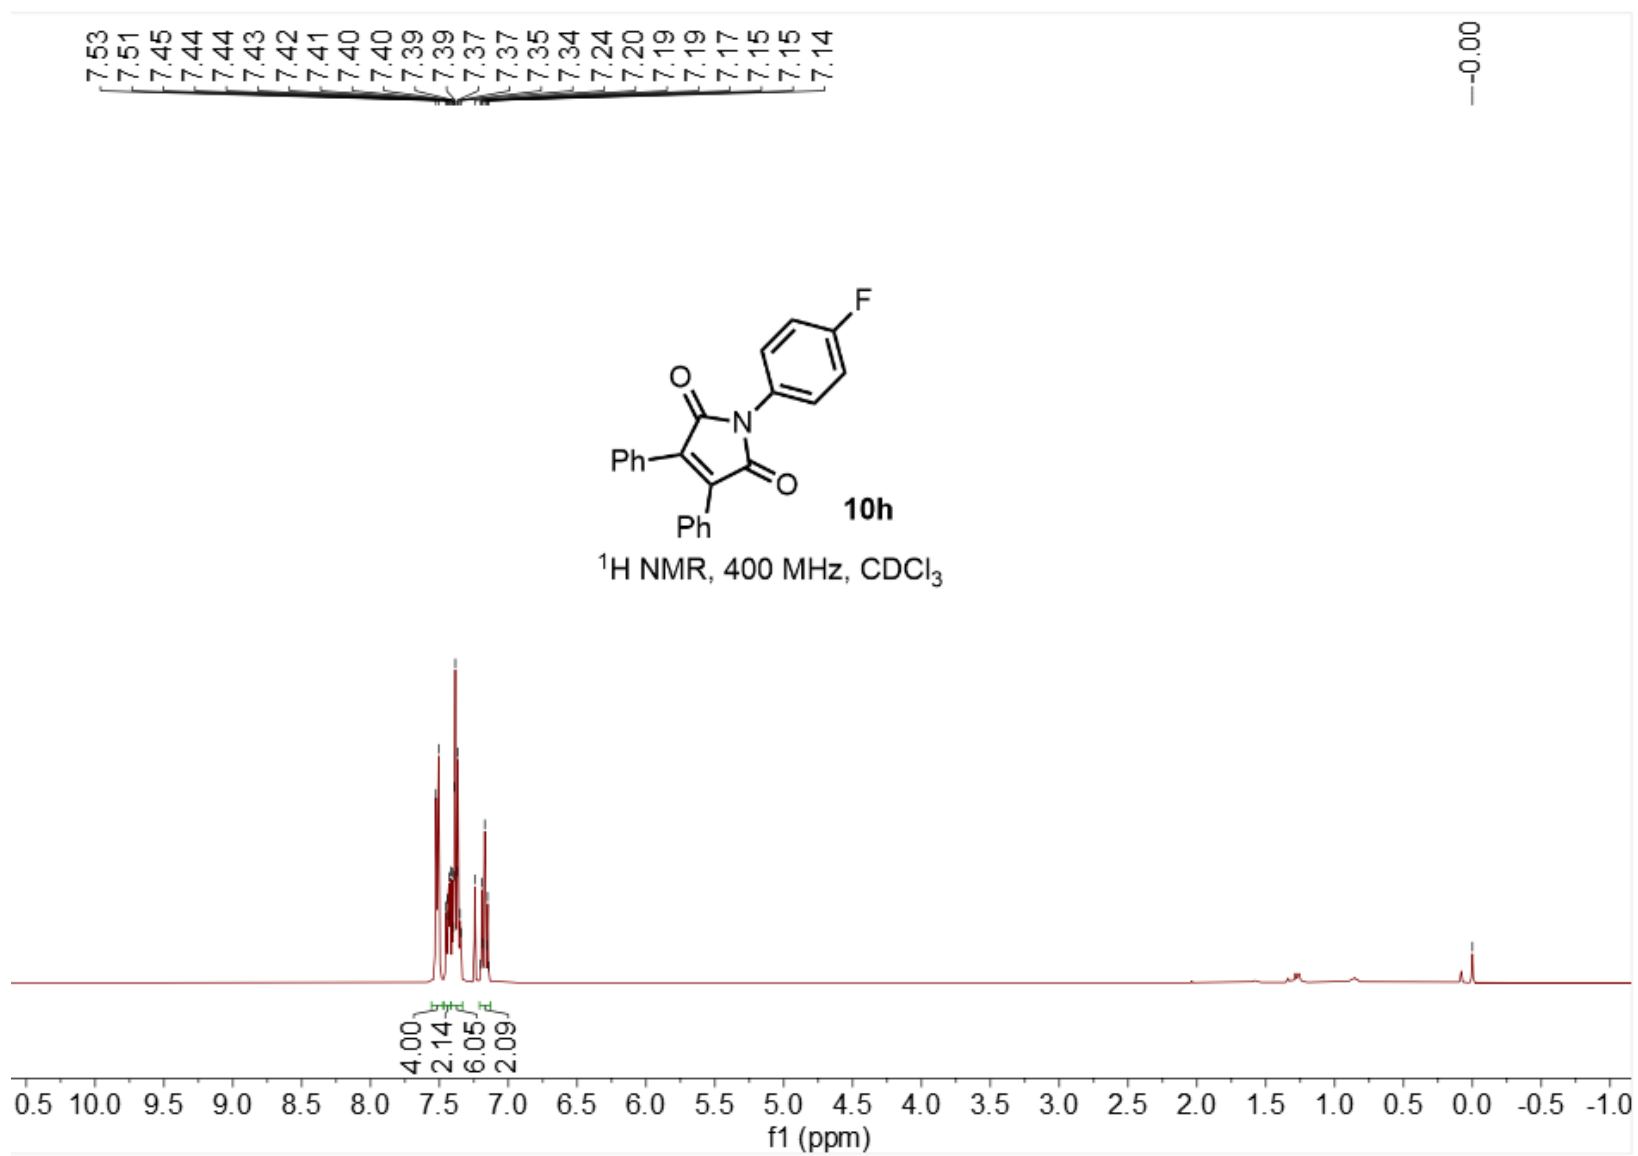

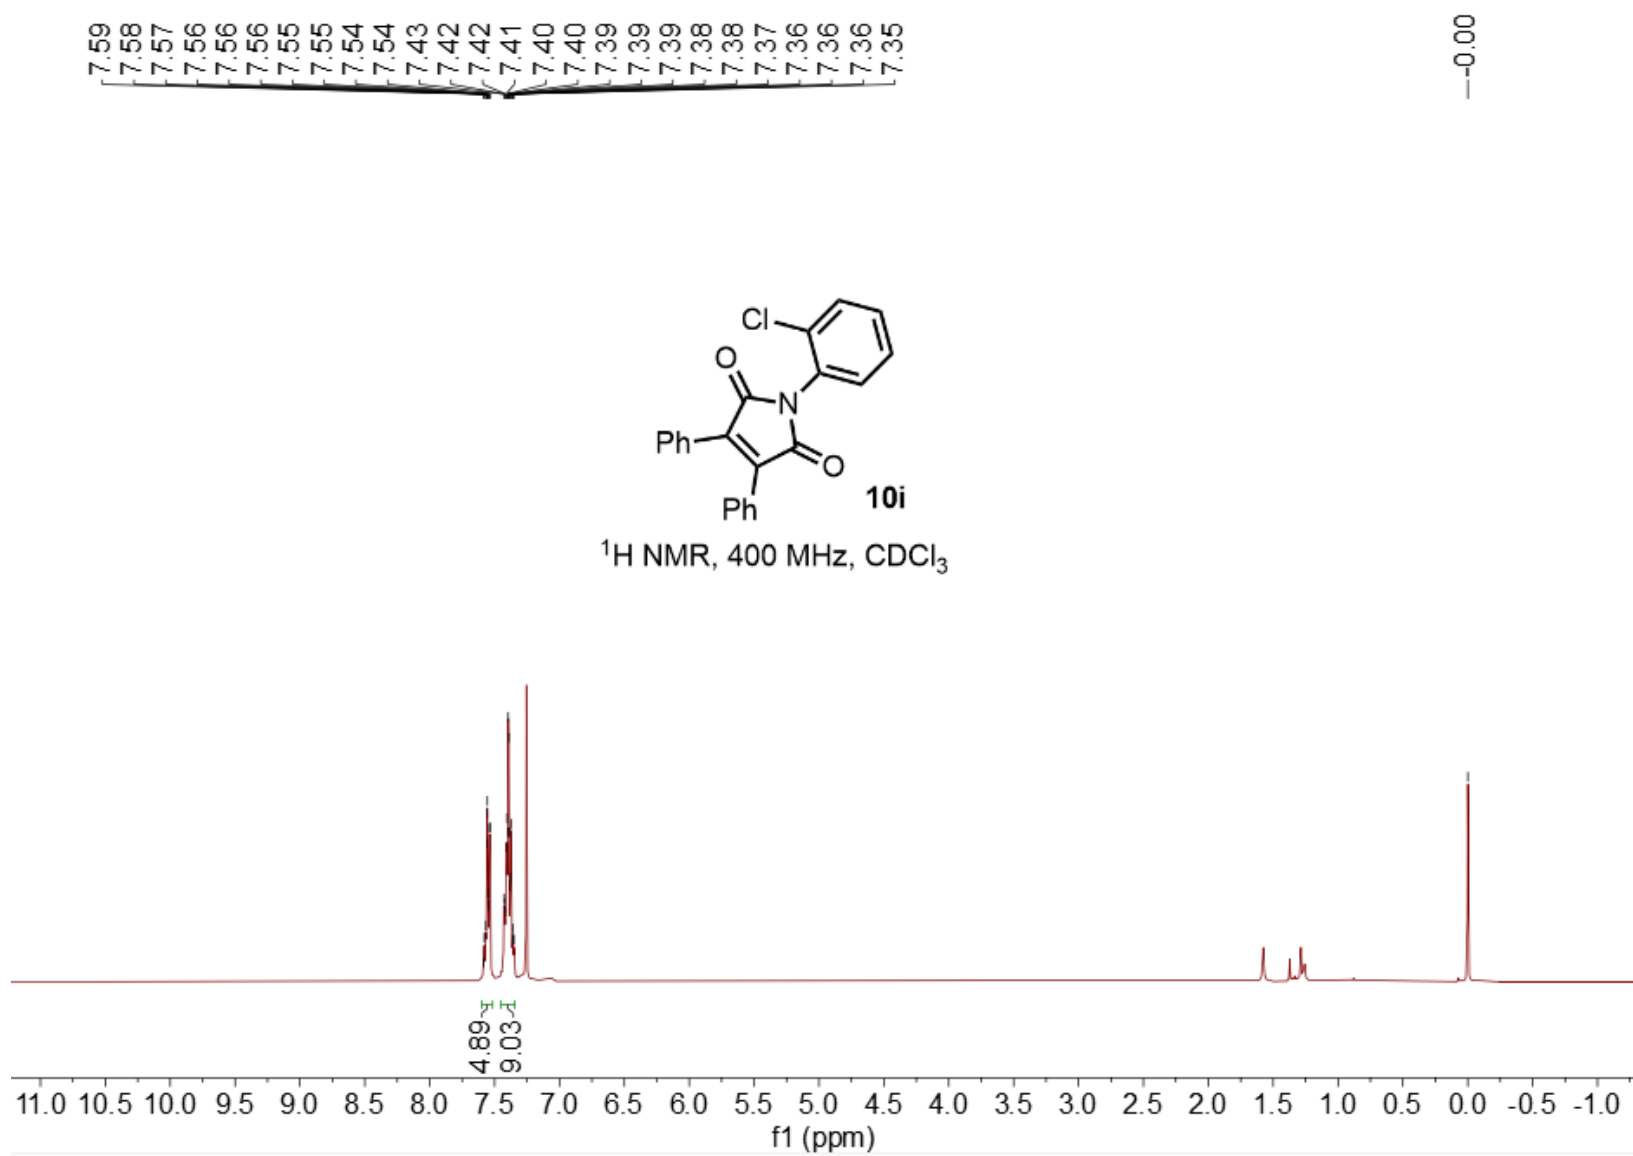



7.77  
7.75  
7.68  
7.66  
7.53  
7.52  
7.51  
7.43  
7.42  
7.41  
7.40  
7.39  
7.39  
7.37  
7.36  
7.26

-0.00

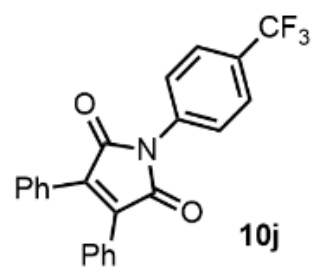

<sup>1</sup>H NMR, 400 MHz, CDCl<sub>3</sub>

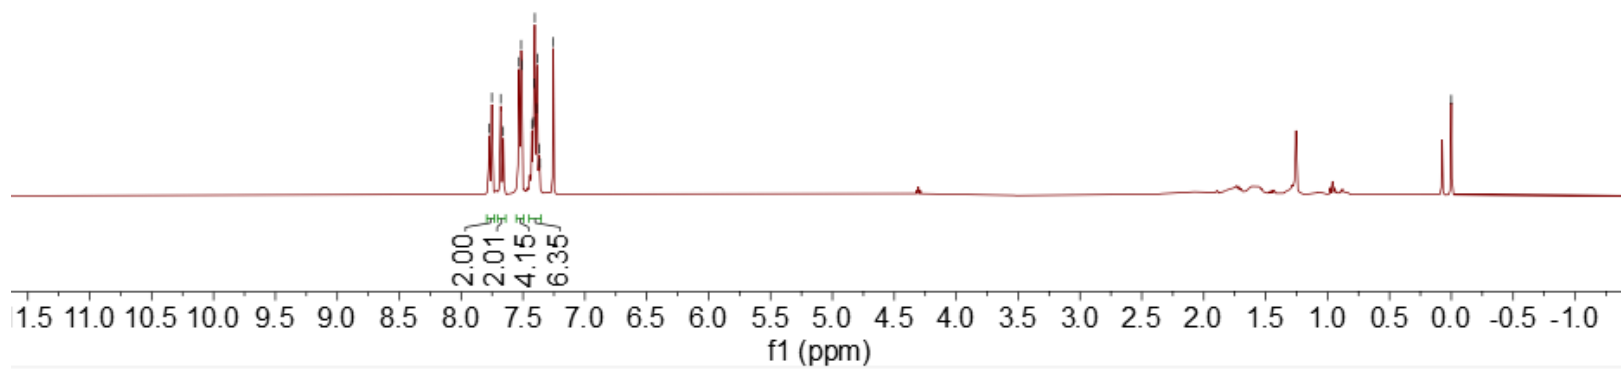

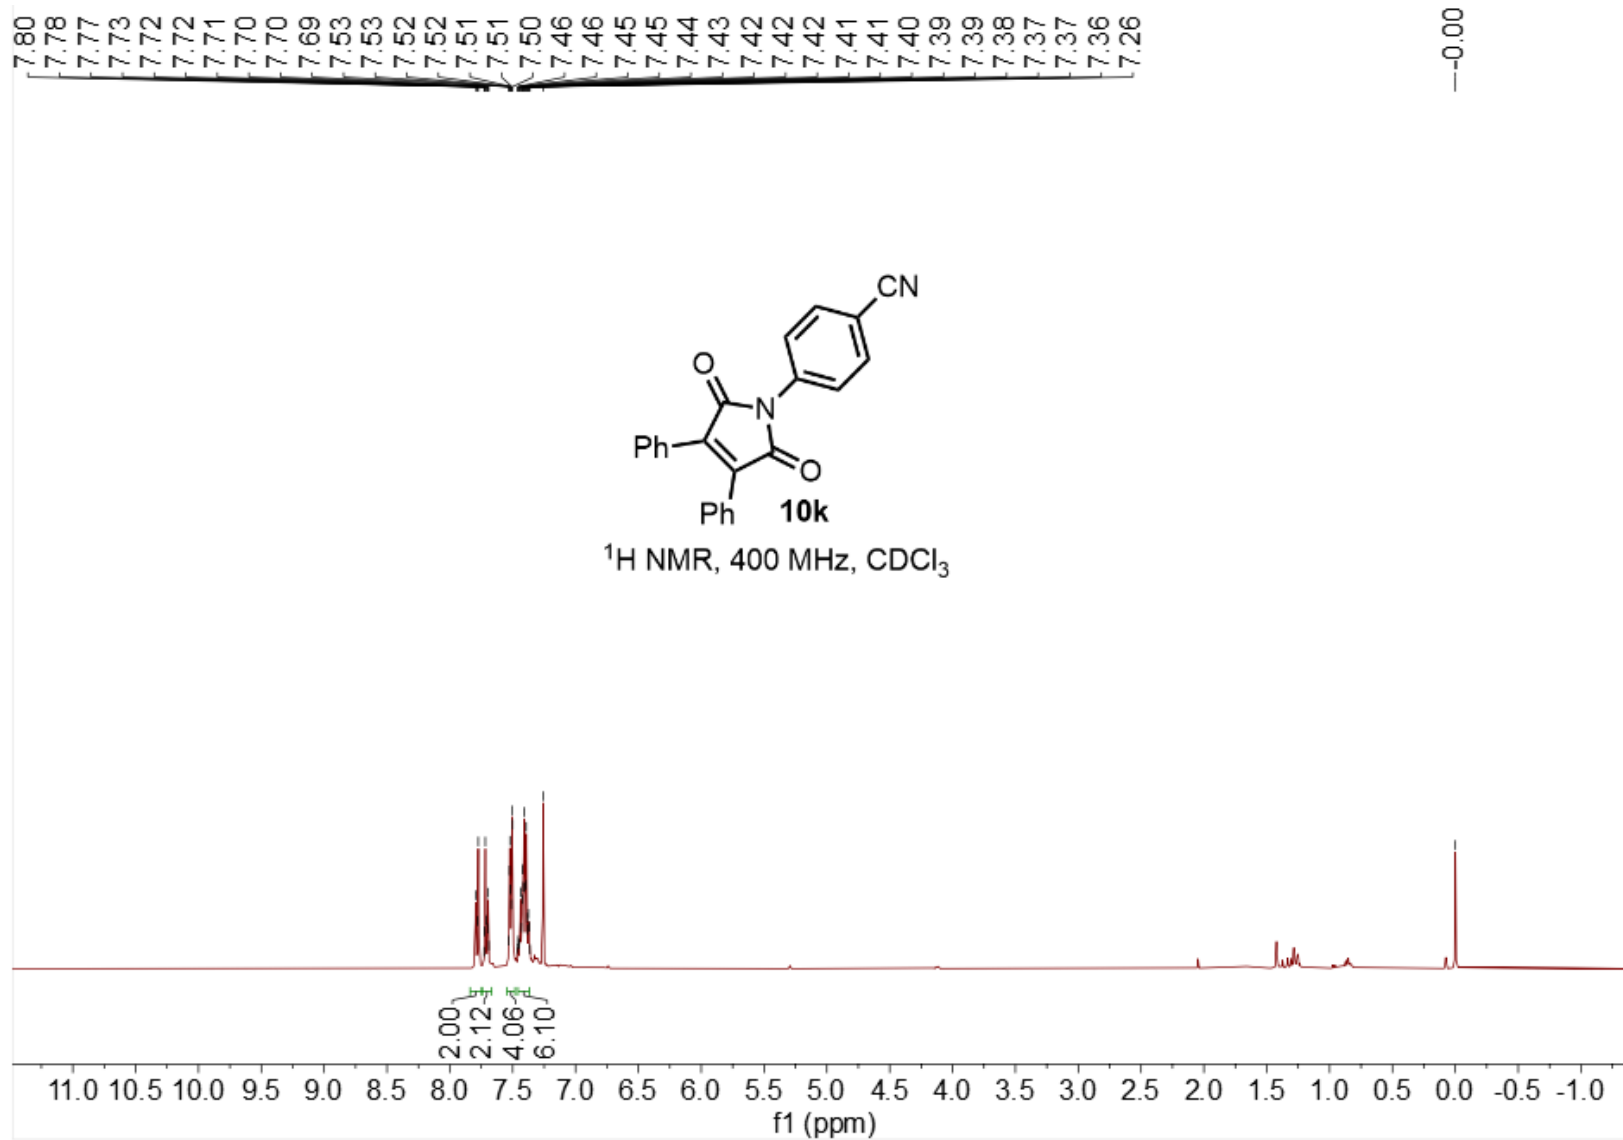

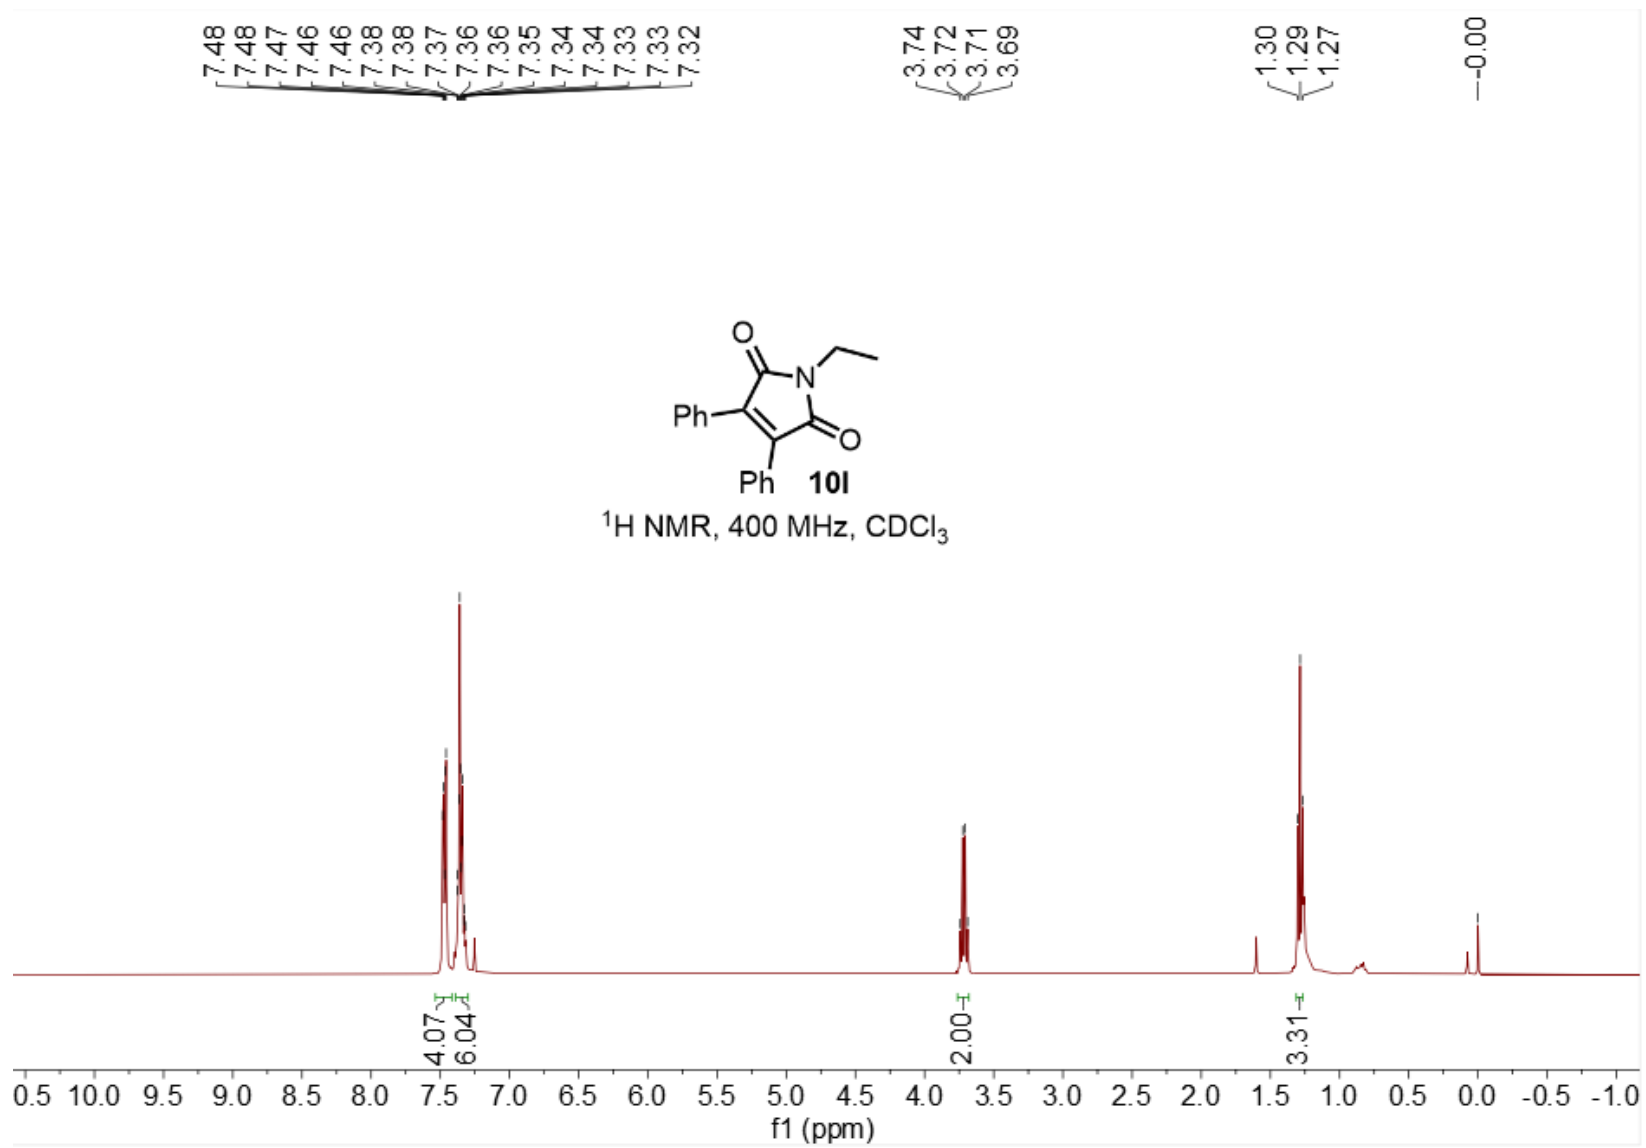

7.47  
7.46  
7.45  
7.45  
7.44  
7.39  
7.39  
7.37  
7.37  
7.36  
7.36  
7.35  
7.35  
7.34  
7.34  
7.33  
7.32  
7.31  
7.26  
4.09  
4.07  
4.06  
4.06  
4.05  
4.03  
2.19  
2.18  
2.15  
2.15  
2.12  
2.11  
1.88  
1.85  
1.78  
1.75  
1.71  
1.67  
1.39  
1.38  
1.36  
1.35  
1.34  
1.32  
1.31  
1.29  
1.27  
1.26  
1.26  
1.25  
1.23  
-0.00

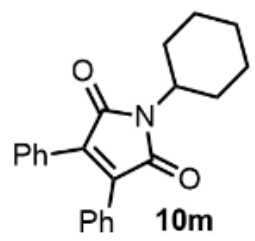

<sup>1</sup>H NMR, 400 MHz, CDCl<sub>3</sub>

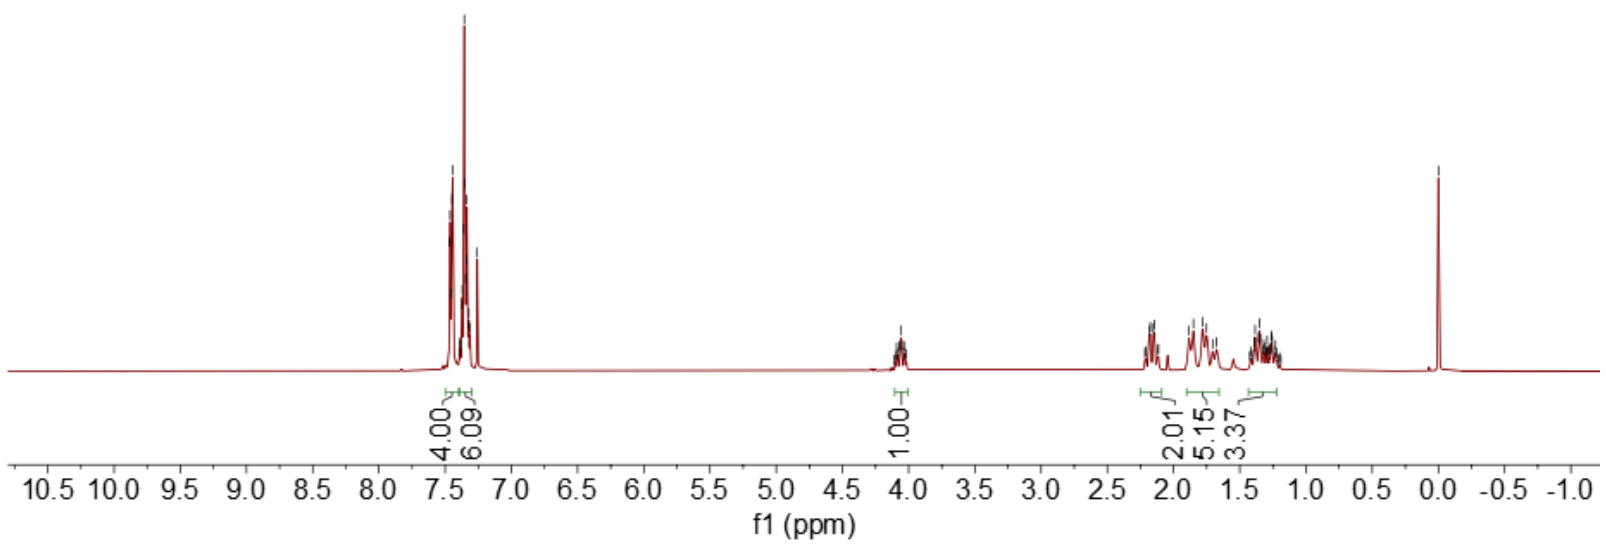

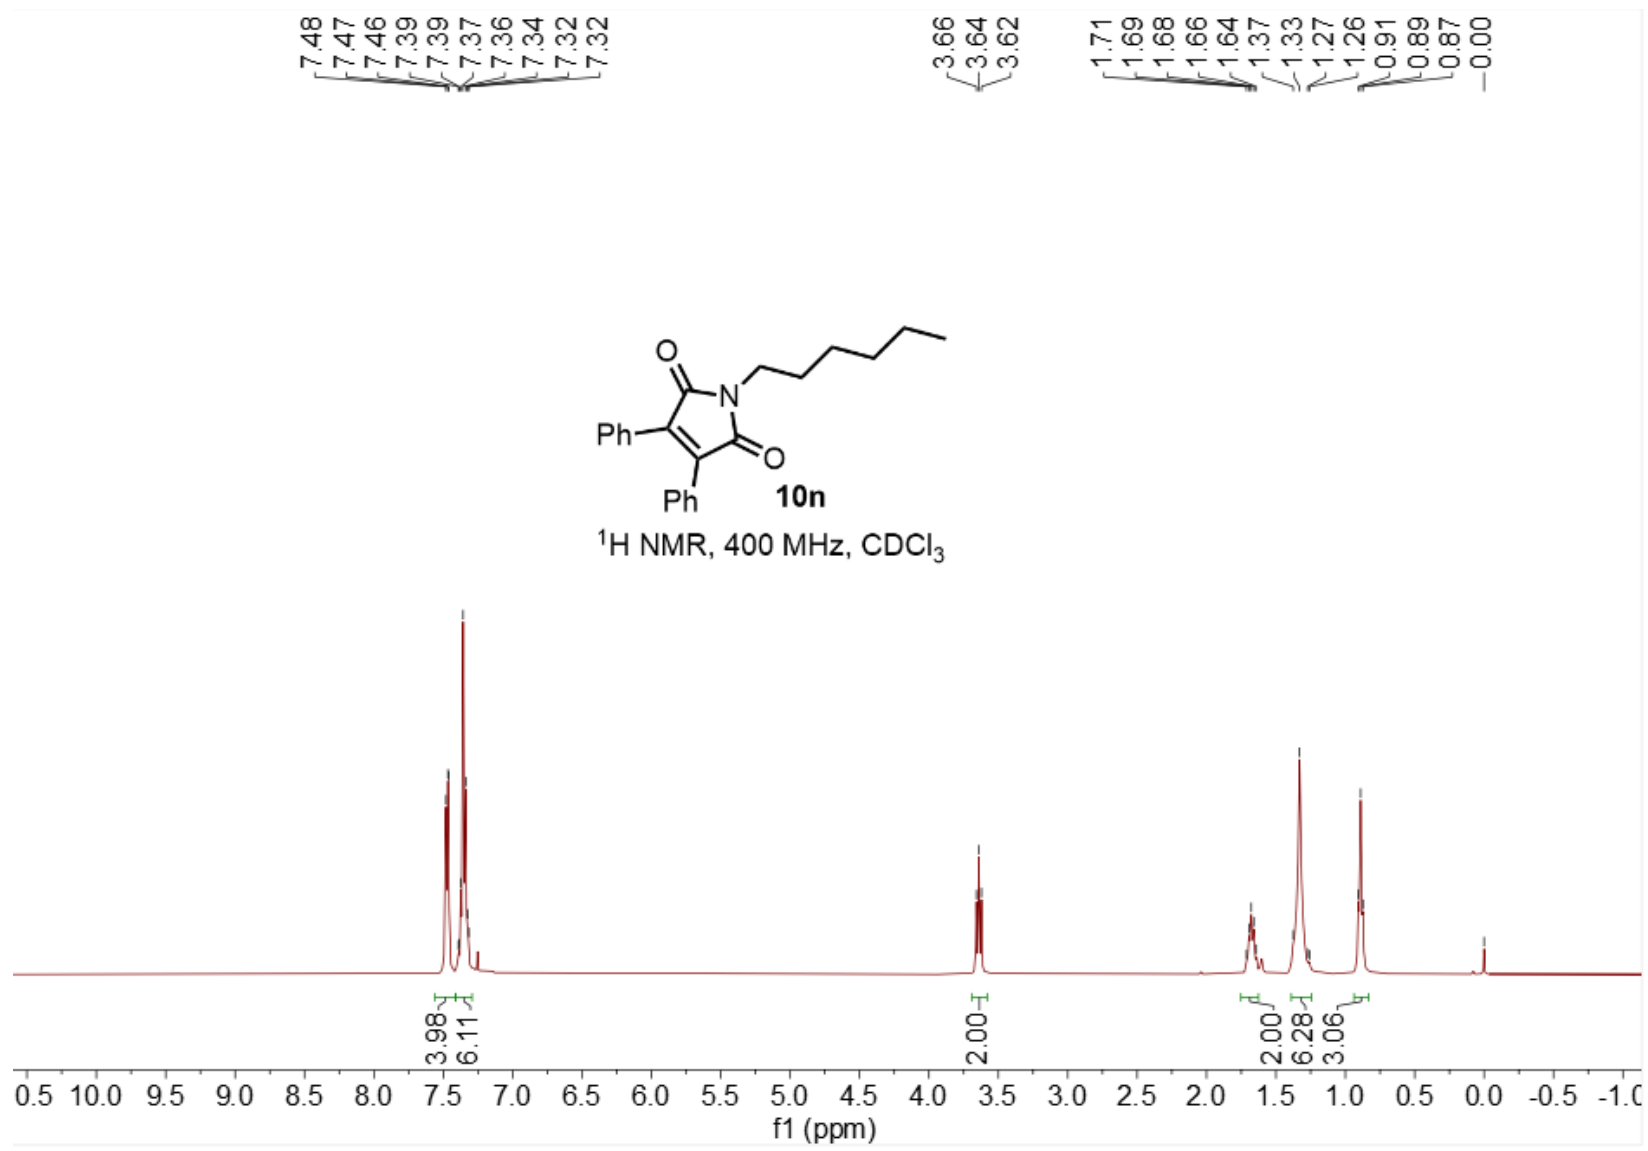

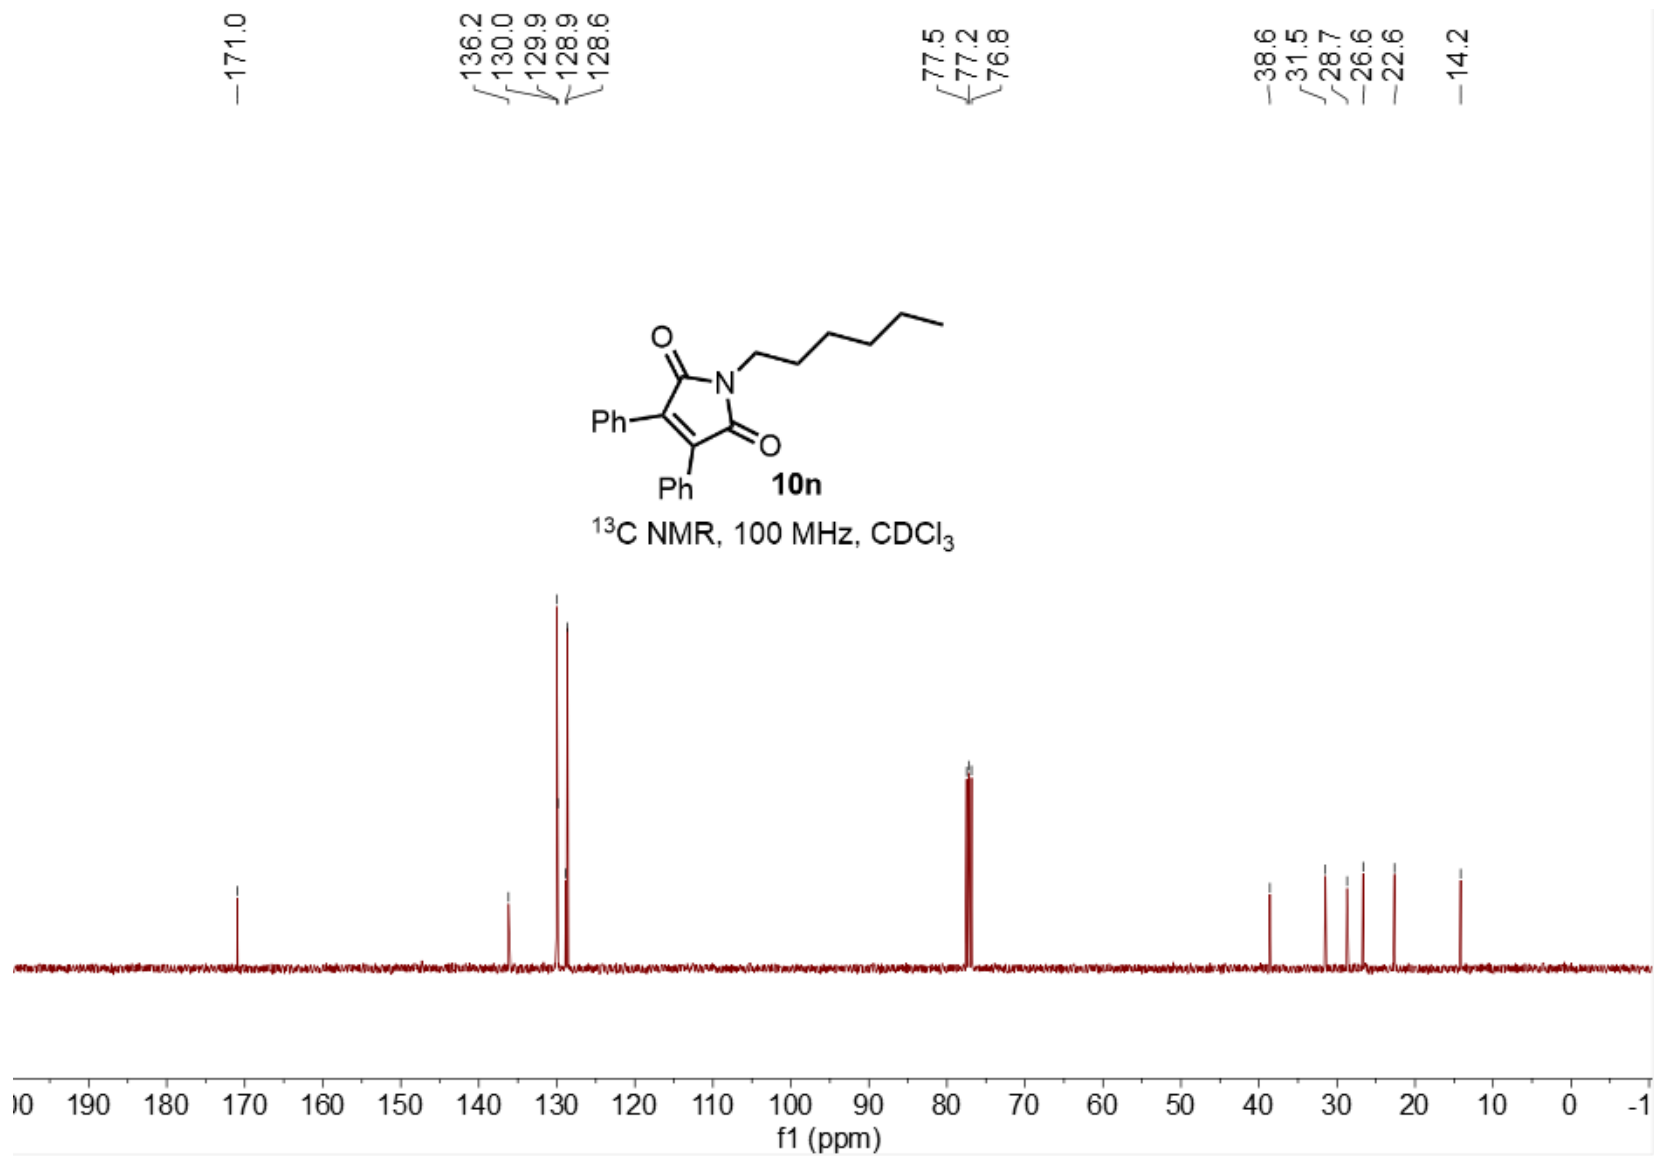

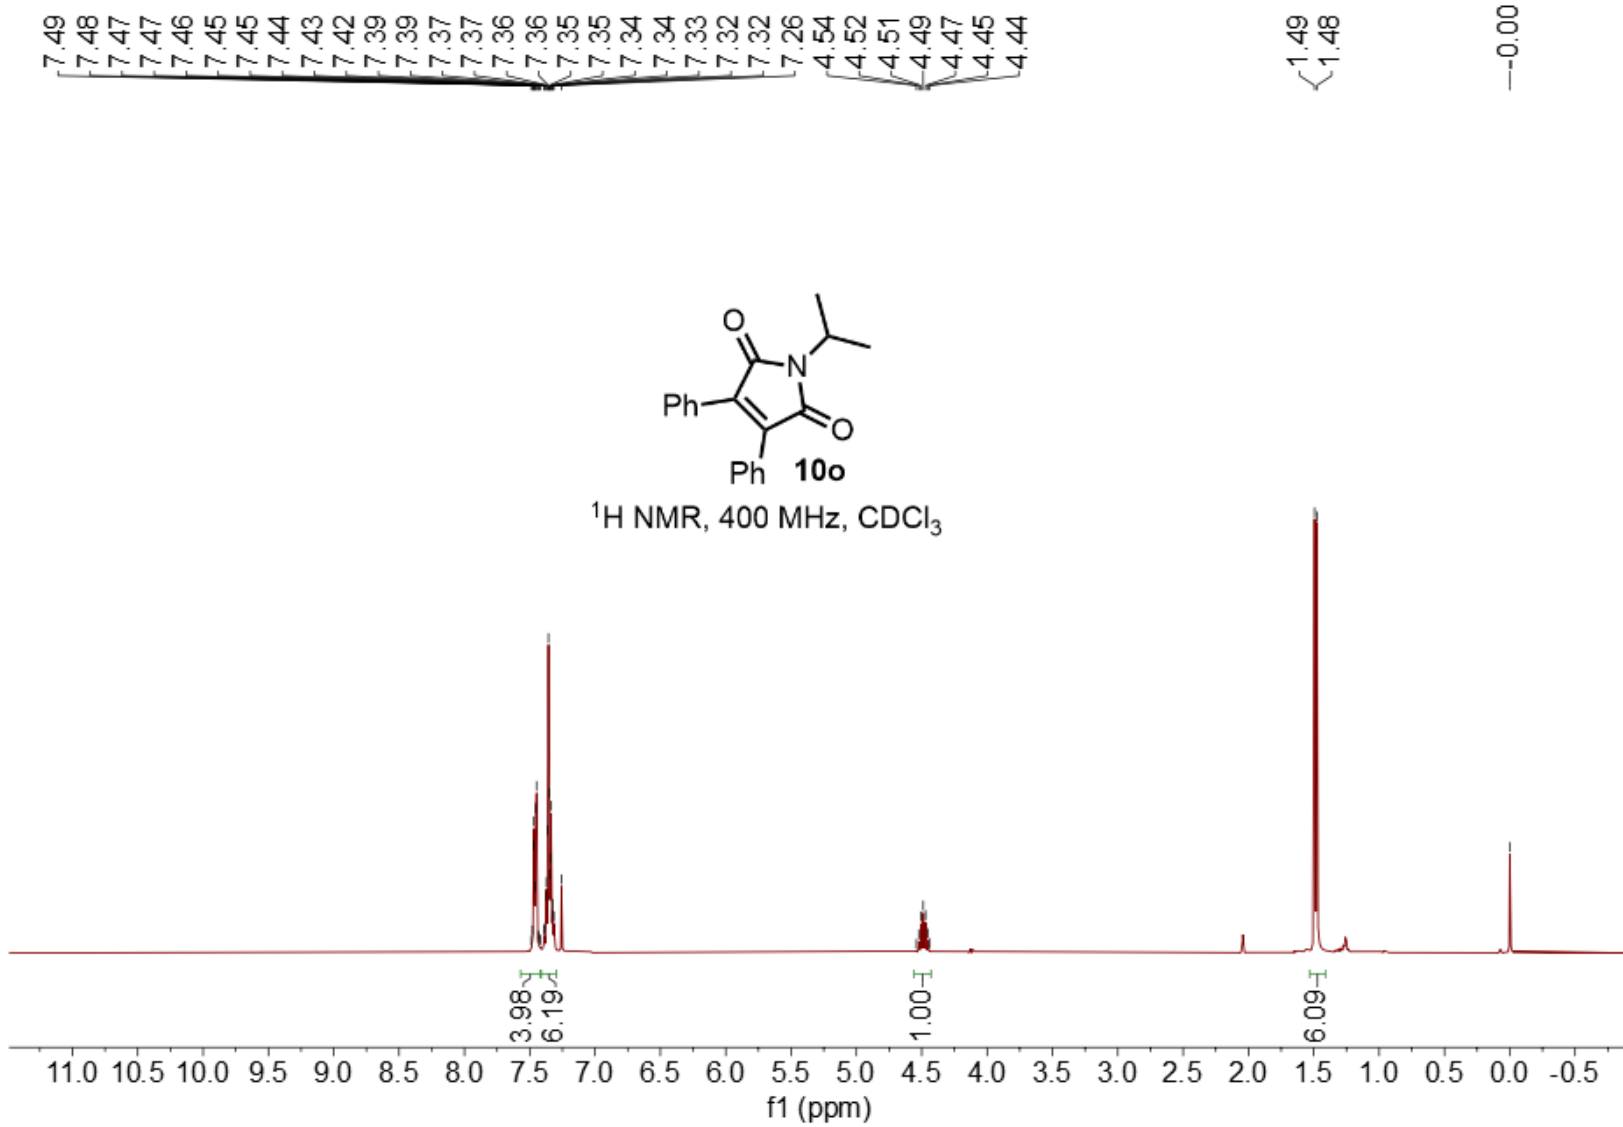

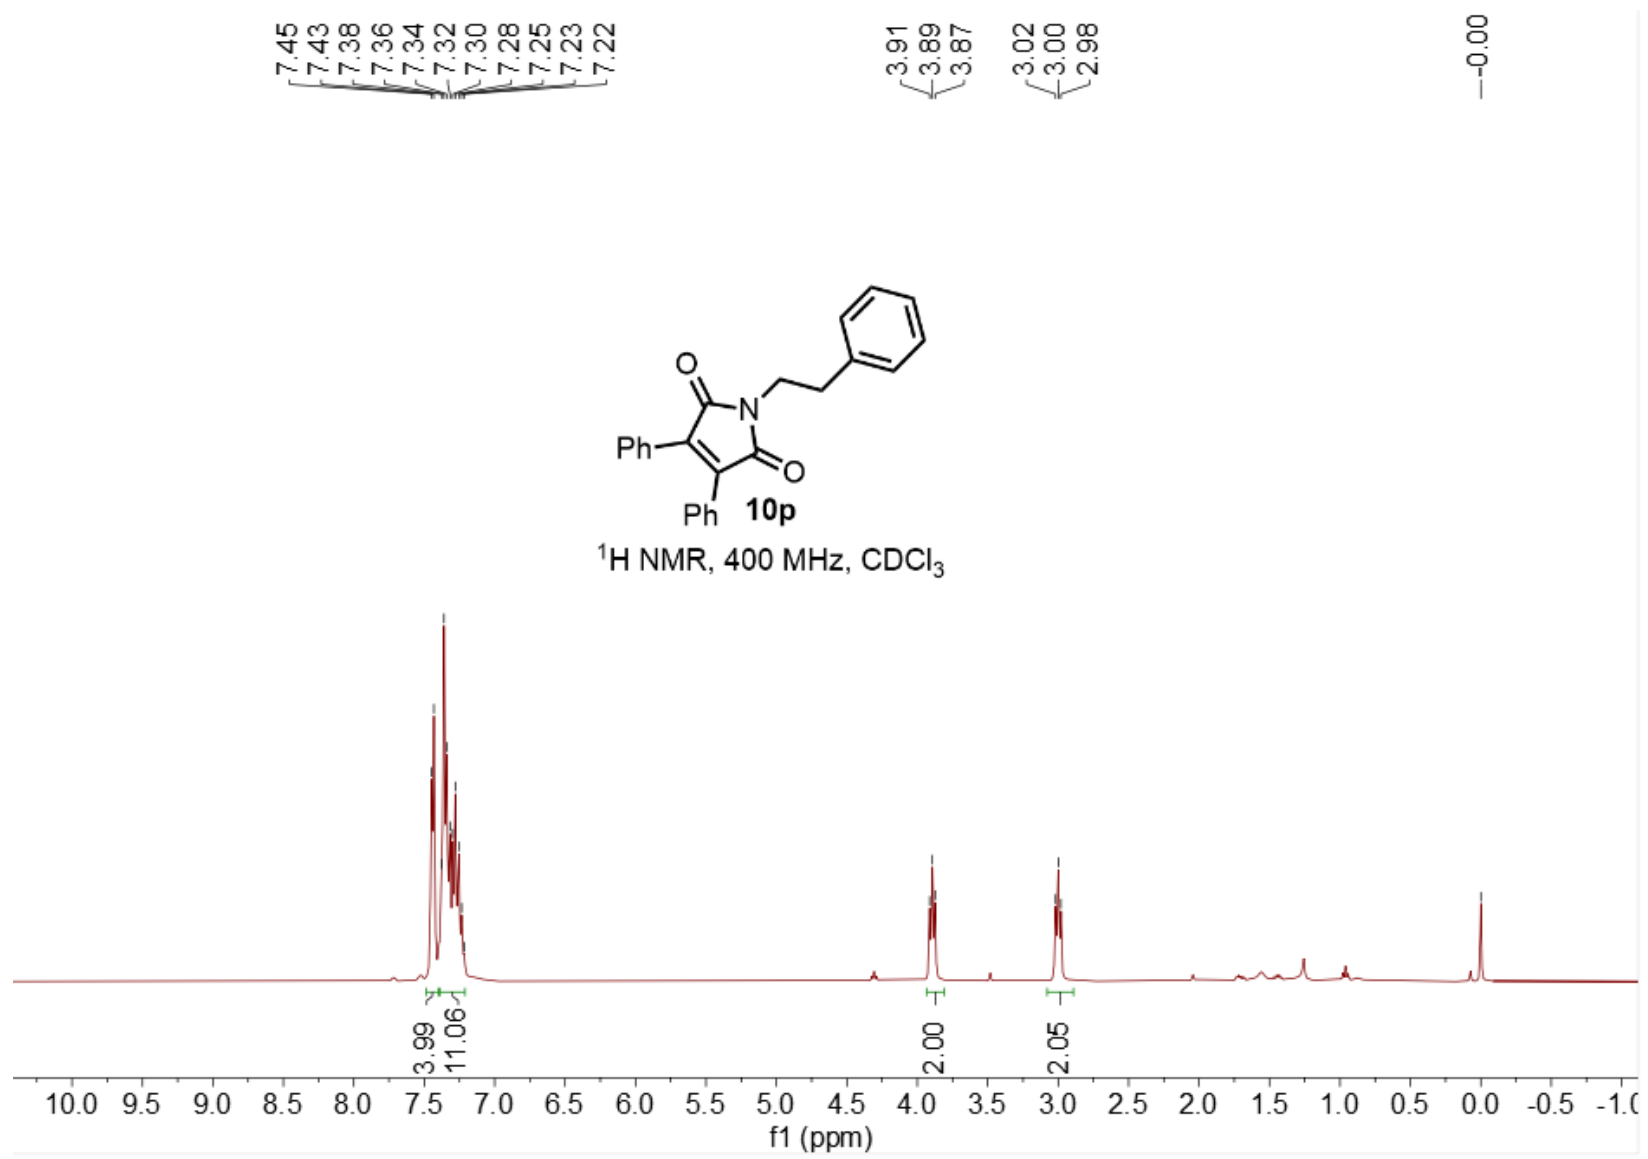



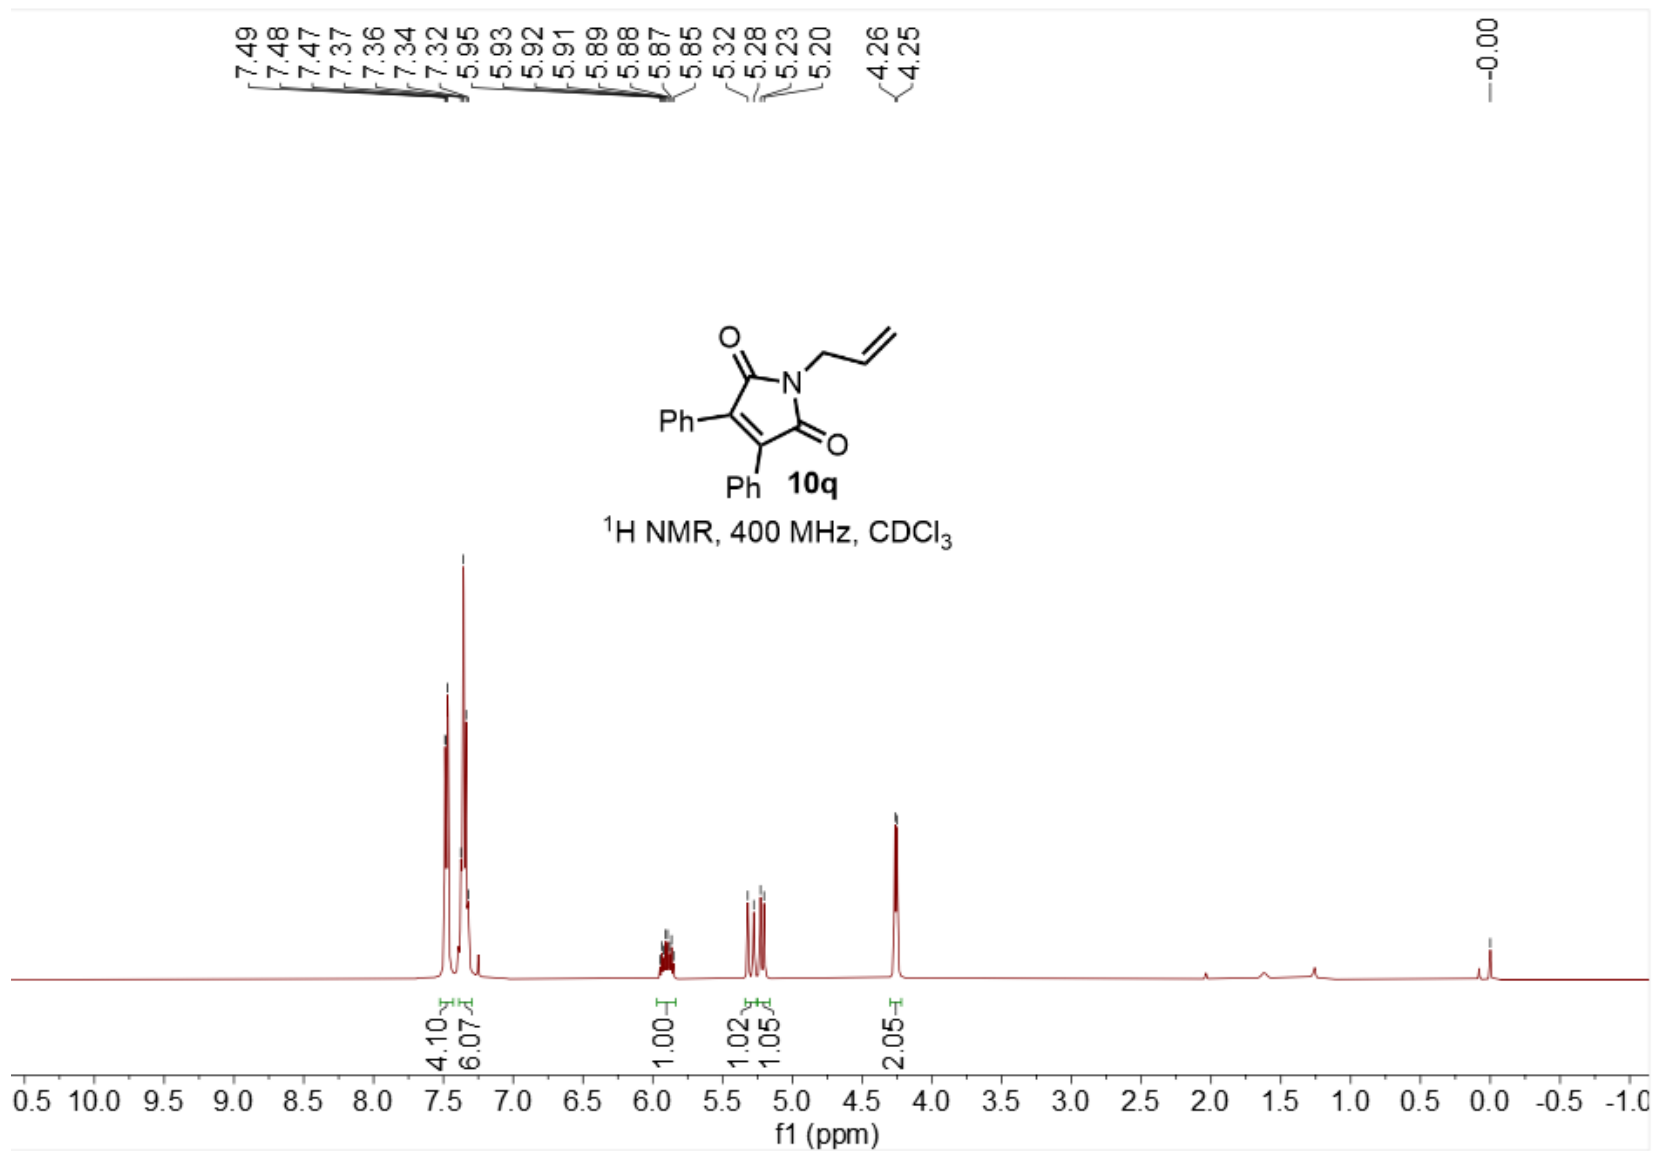

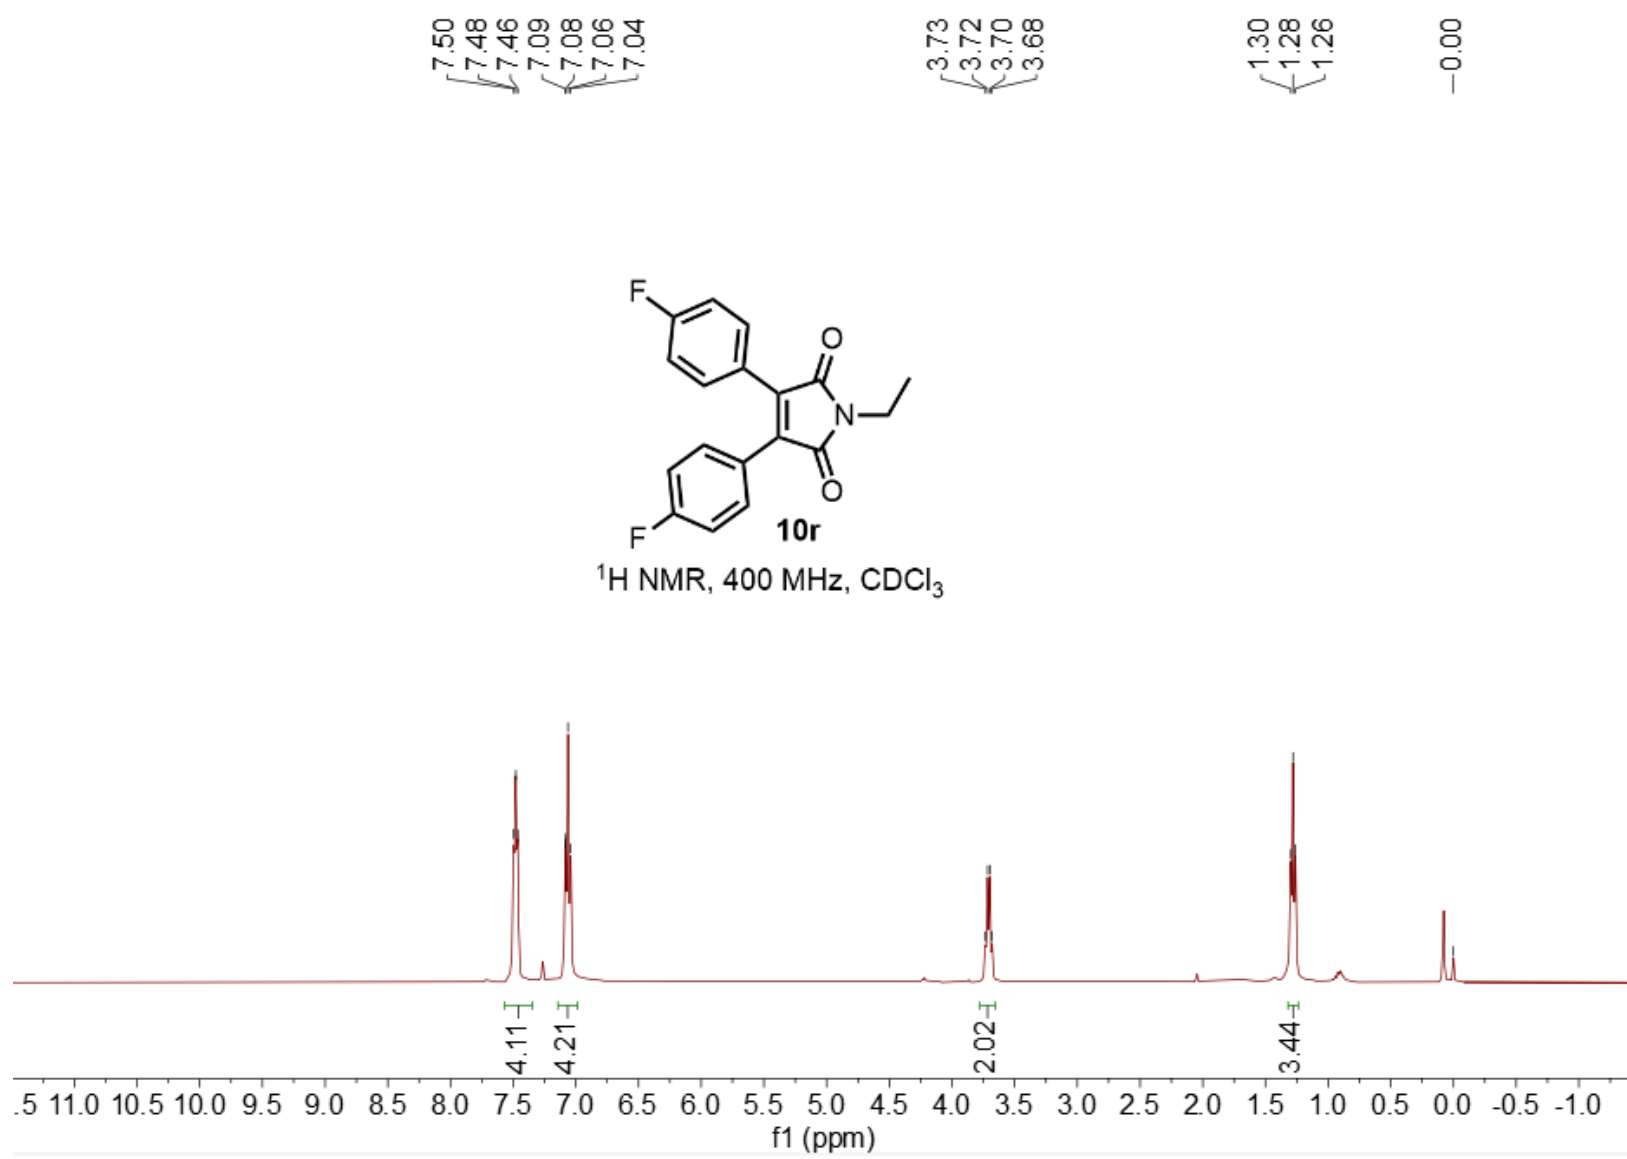

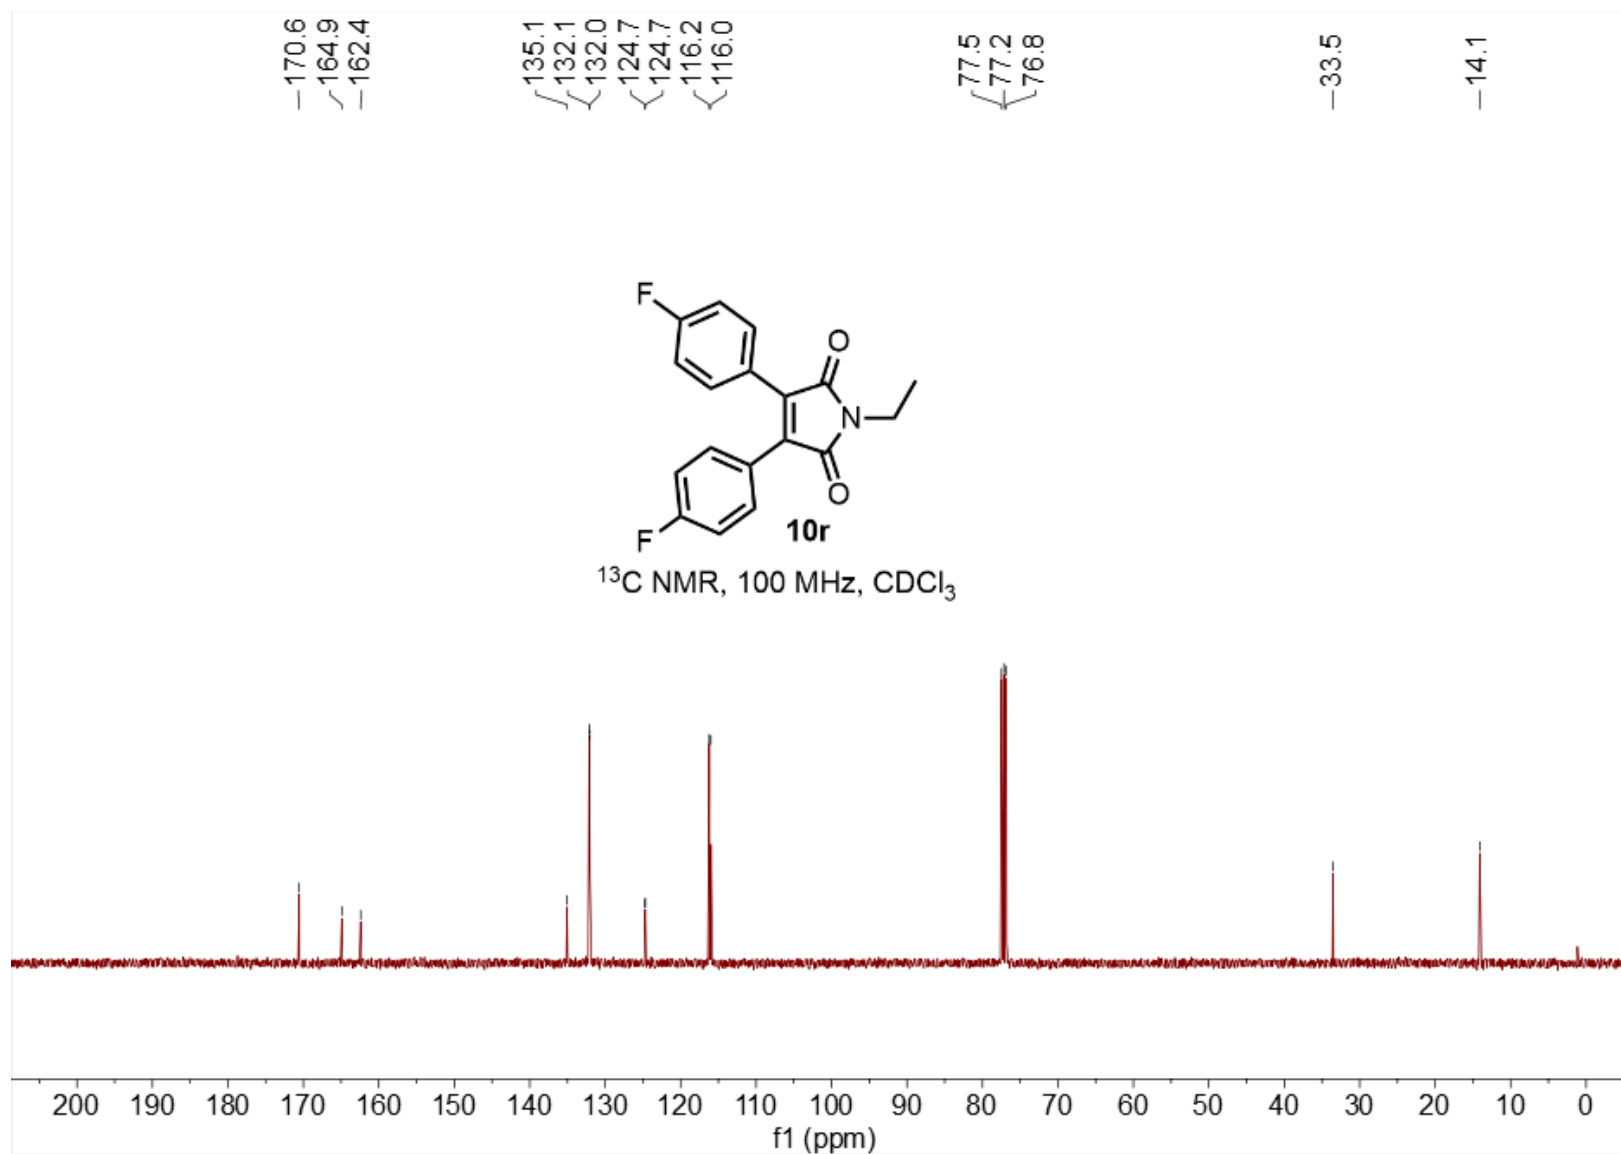

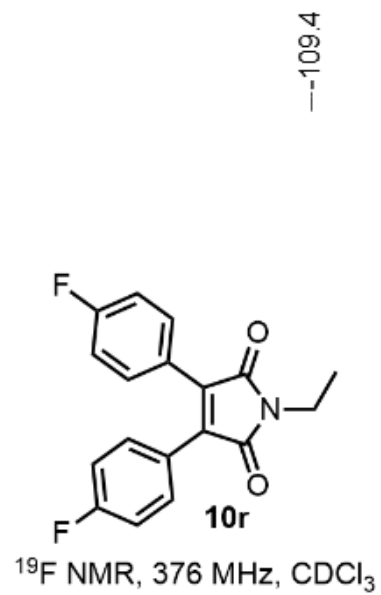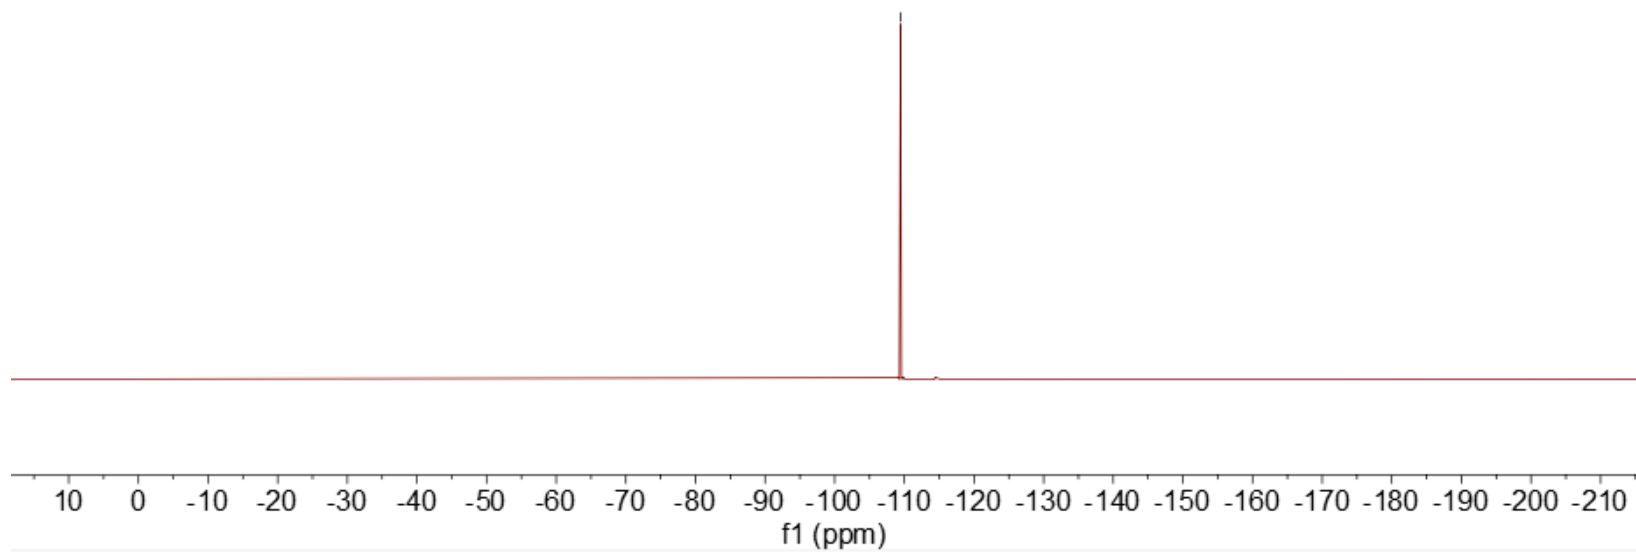

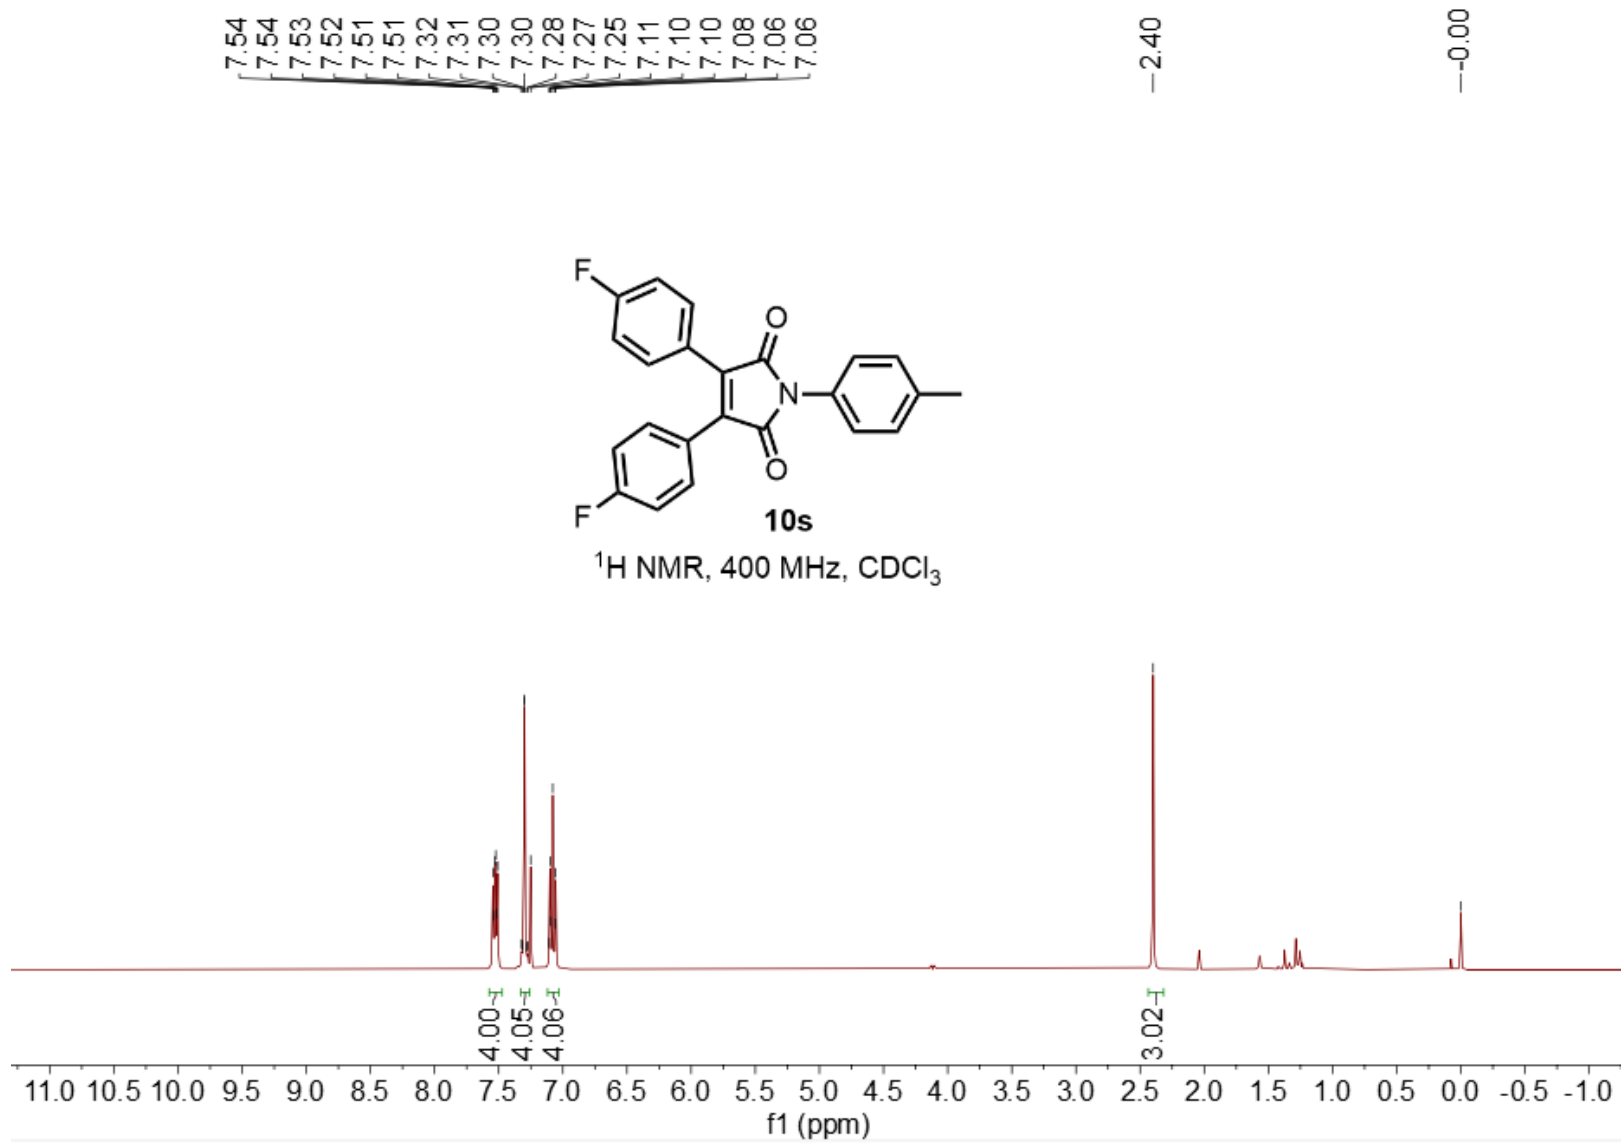

~169.6  
~165.0  
~162.5

138.1  
135.1  
132.3  
132.2  
129.9  
129.1  
126.2  
124.6  
124.5  
116.3  
116.1

77.5  
77.2  
76.8

-21.3

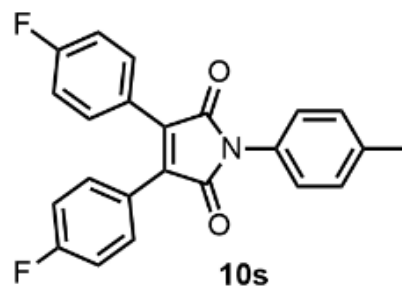

<sup>13</sup>C NMR, 100 MHz, CDCl<sub>3</sub>

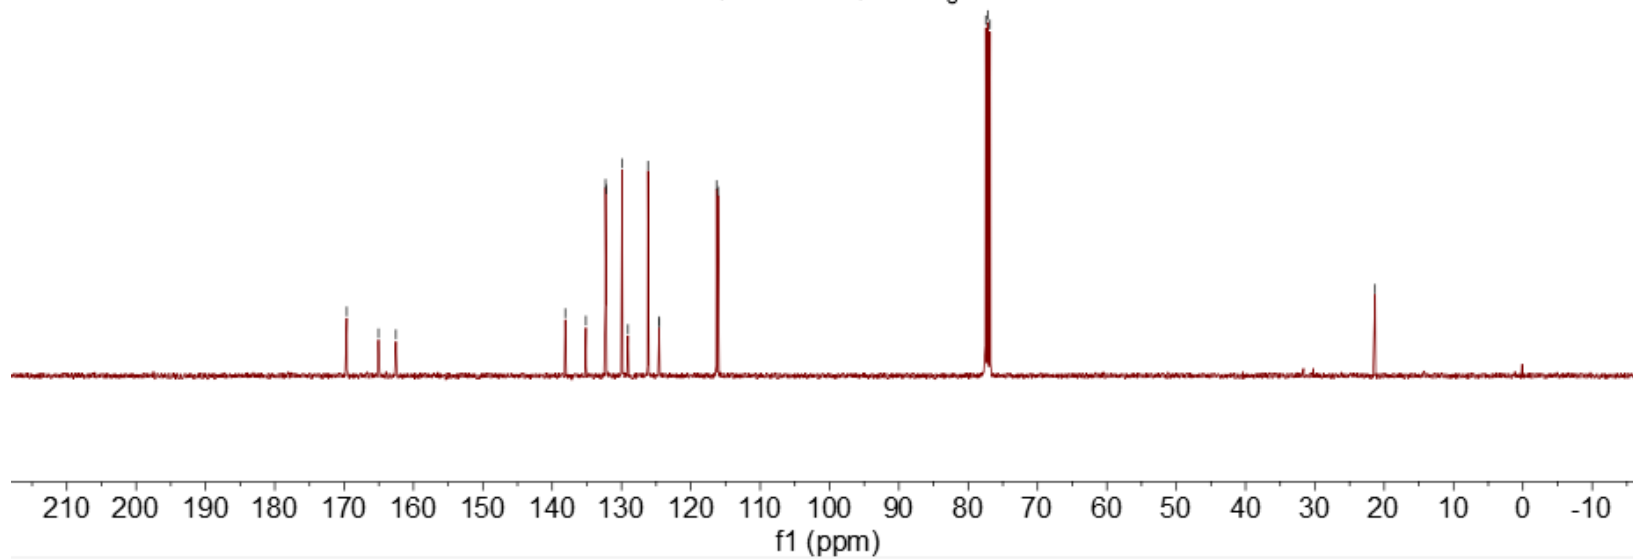

--109.1

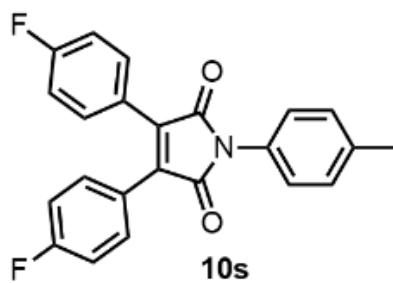

<sup>19</sup>F NMR, 376 MHz, CDCl<sub>3</sub>

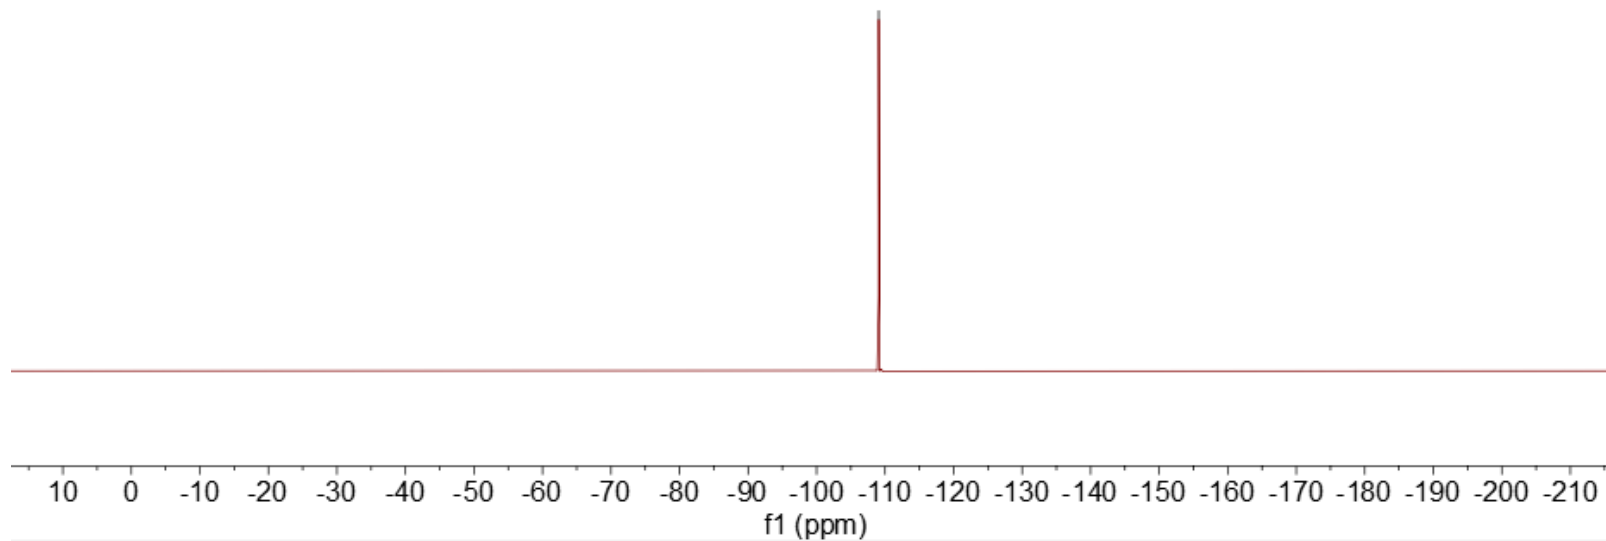

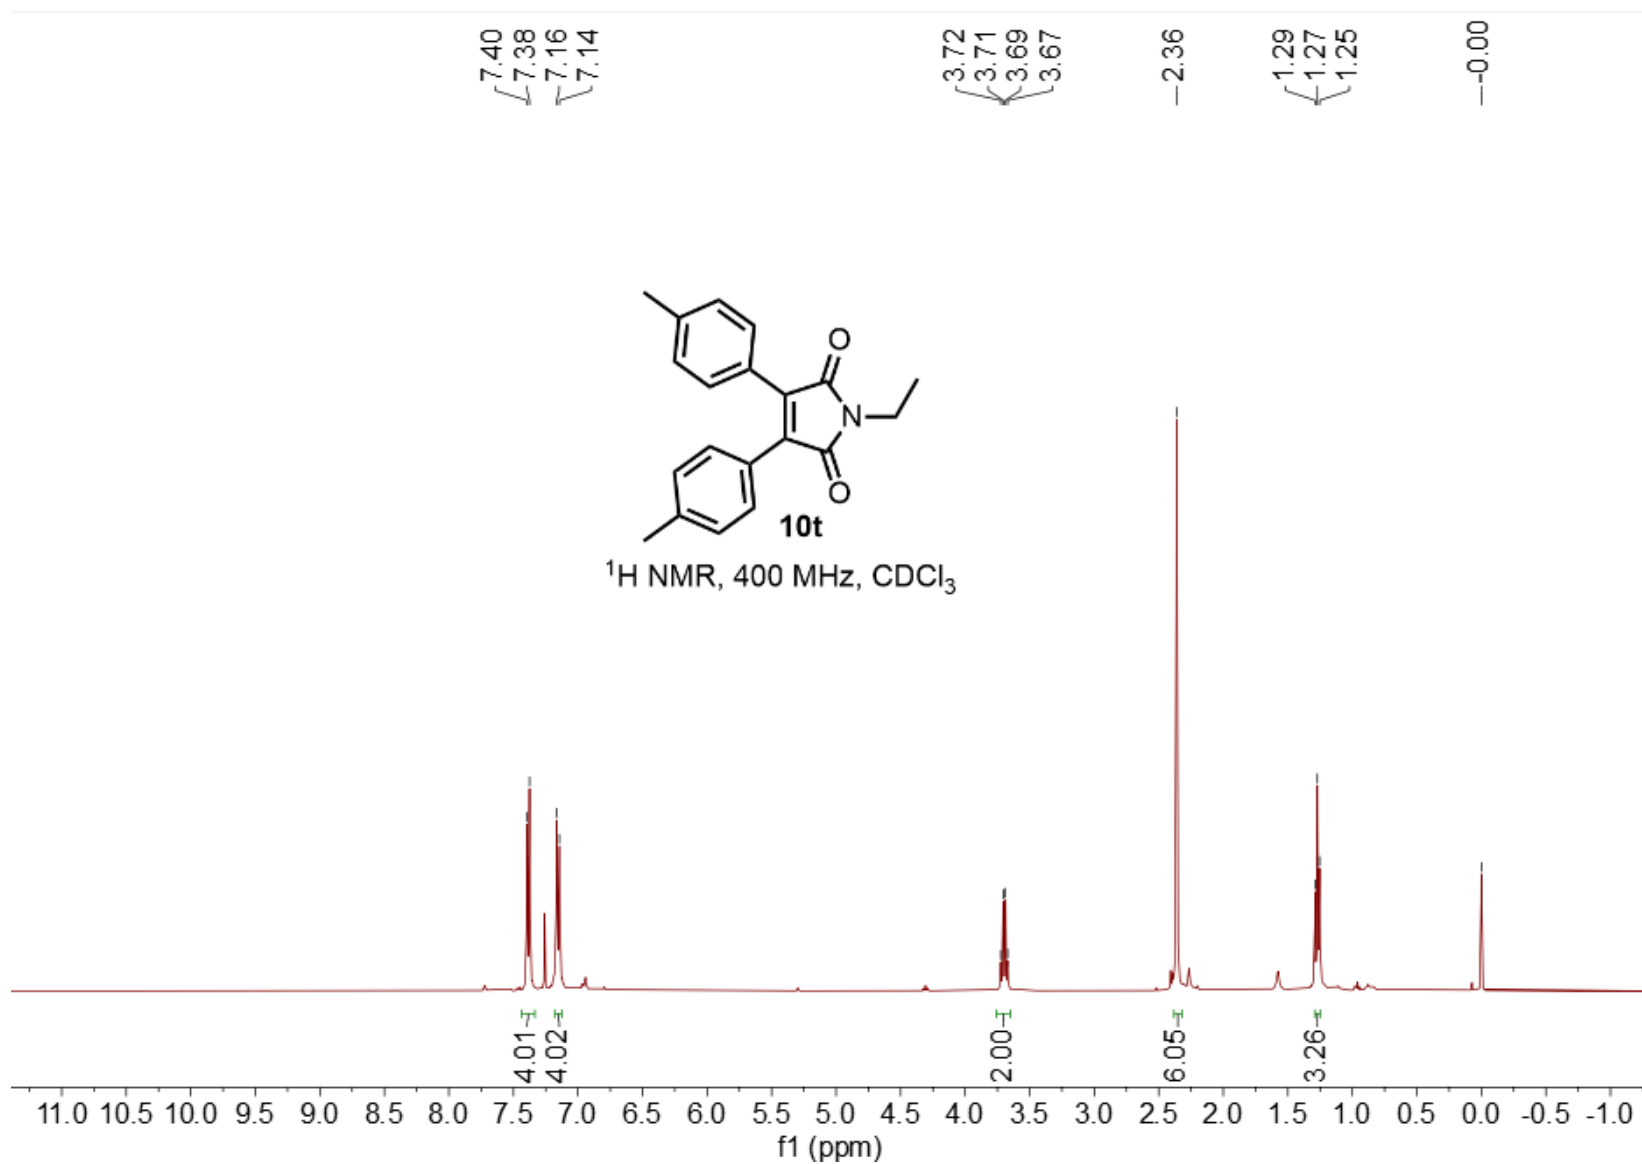



-171.1

140.1

135.6

129.9

129.4

126.1

77.5

77.2

76.8

-33.4

-21.6

-14.2

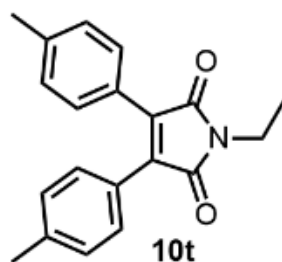

<sup>13</sup>C NMR, 100 MHz, CDCl<sub>3</sub>

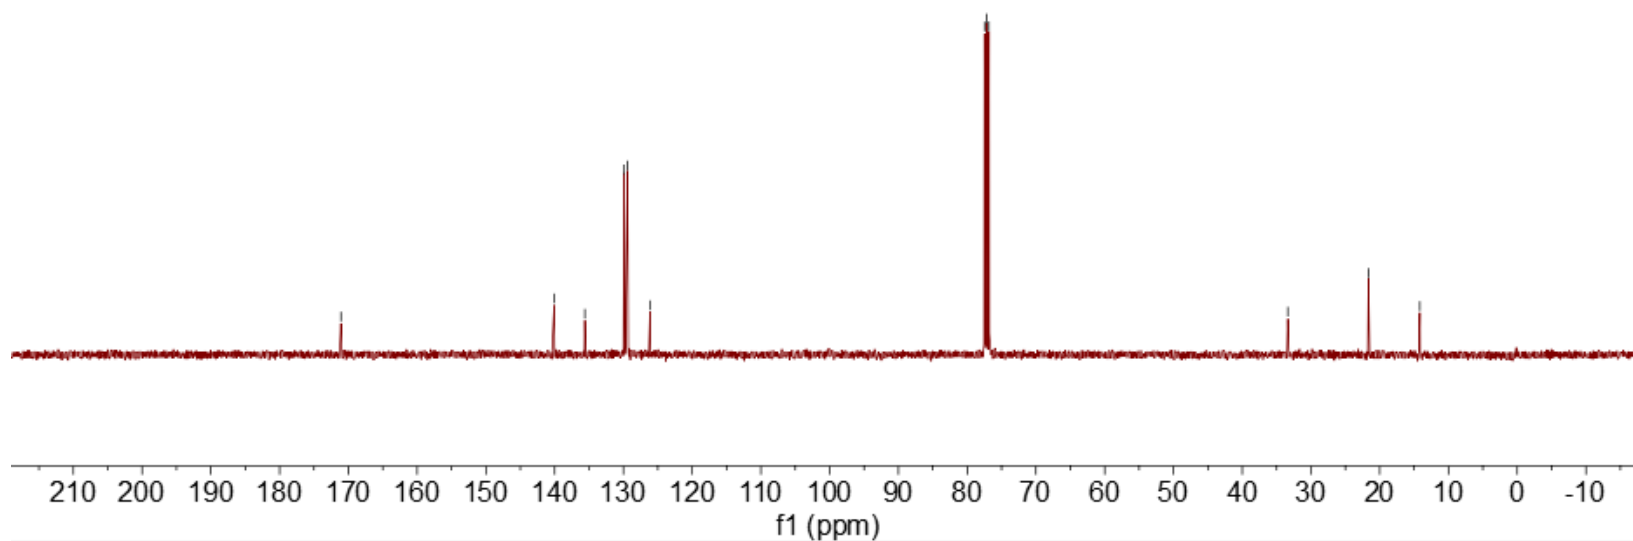

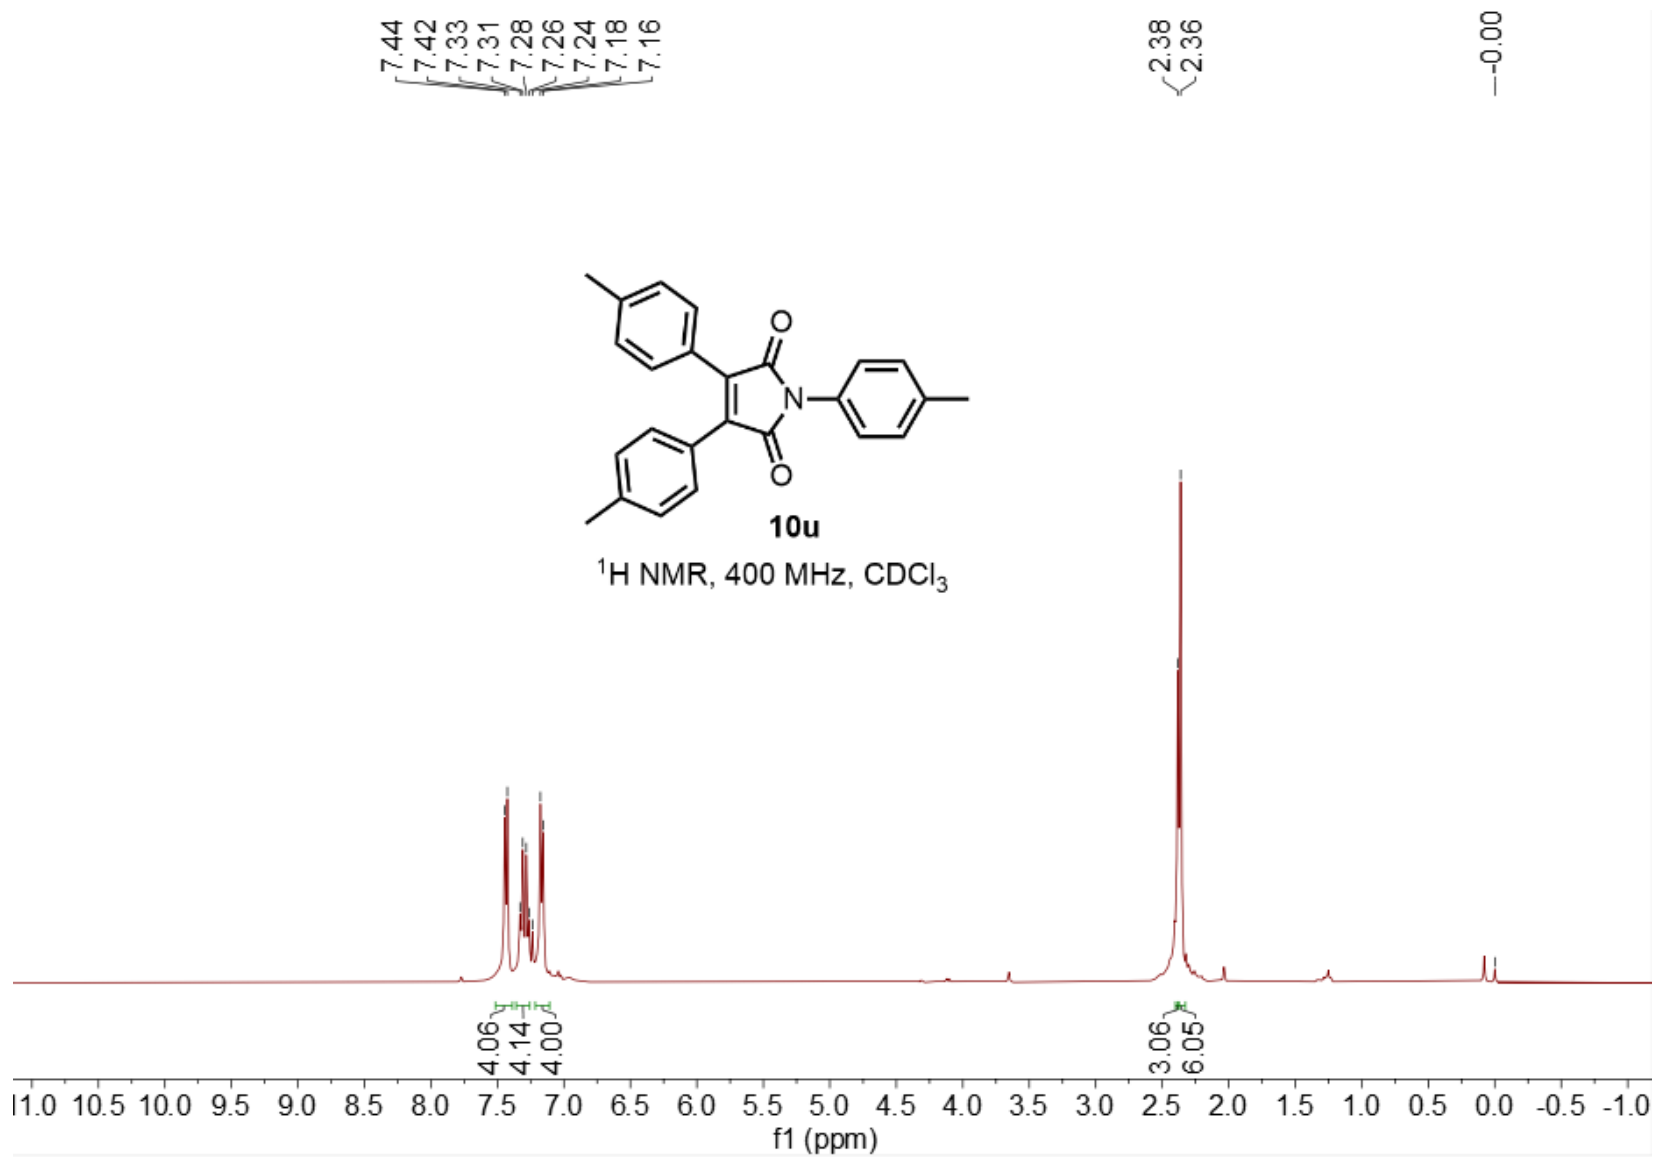

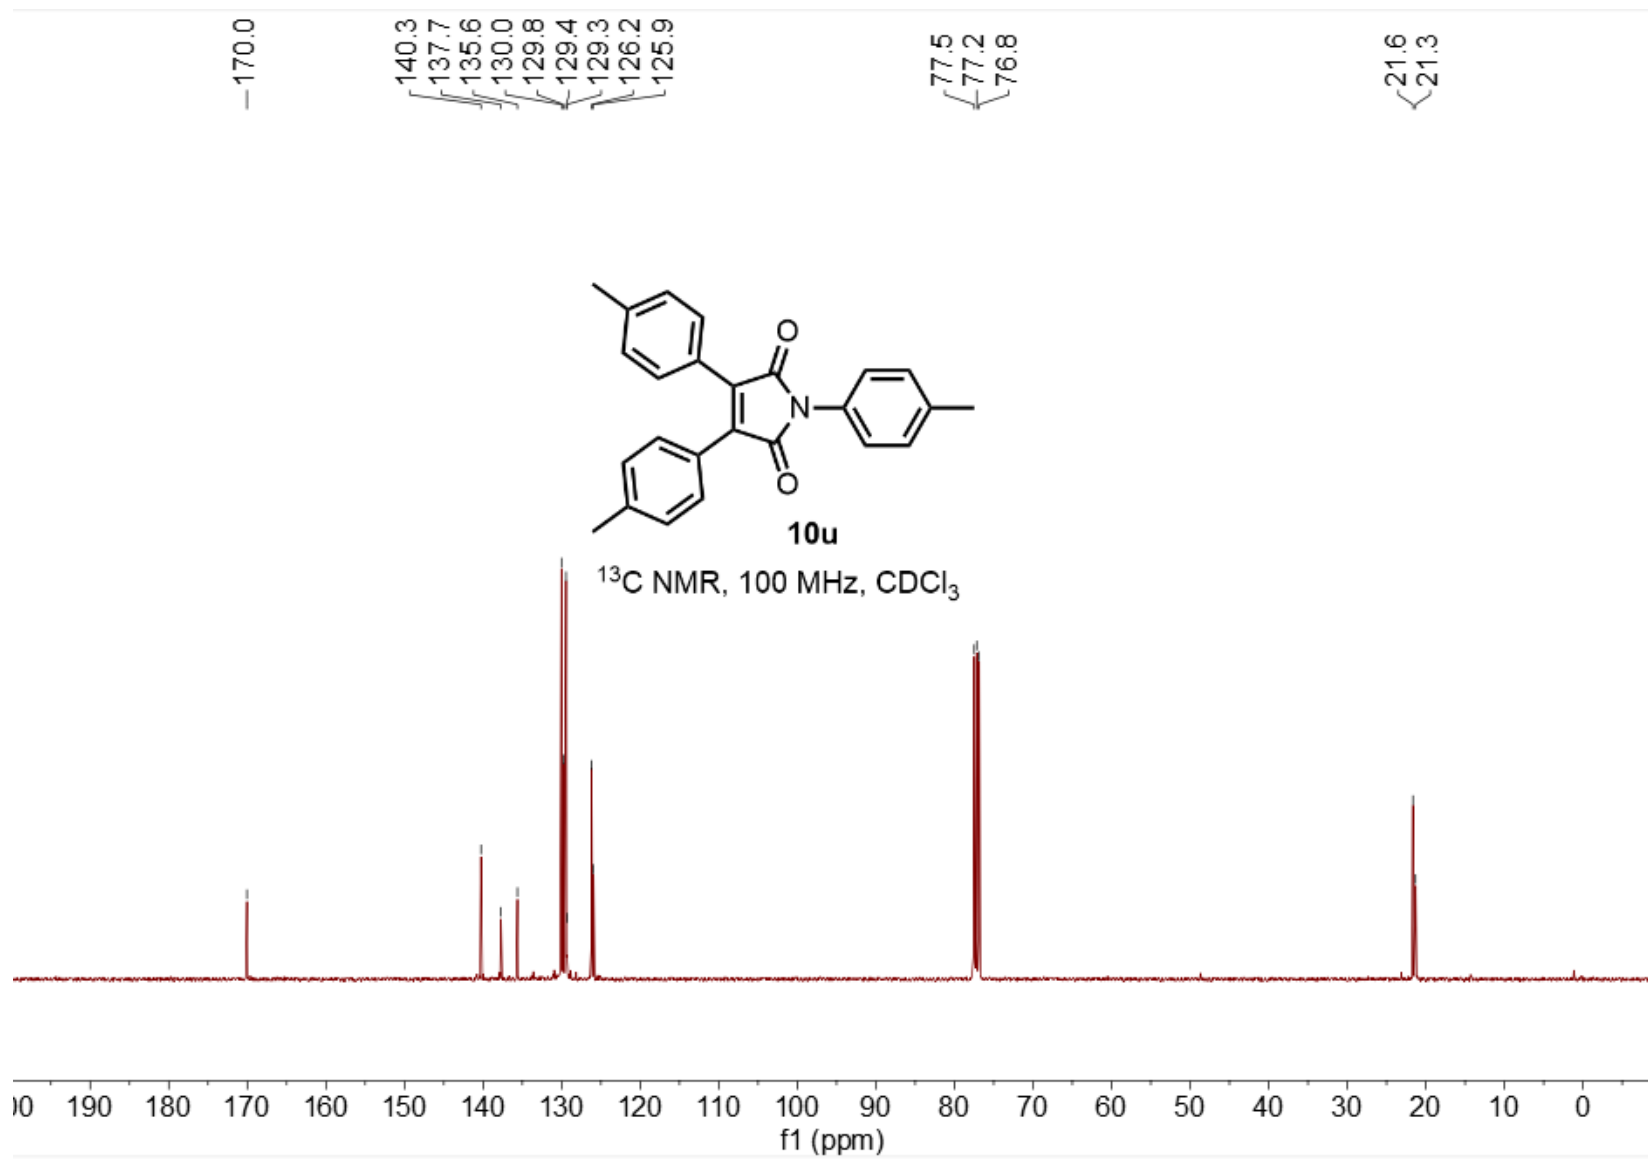

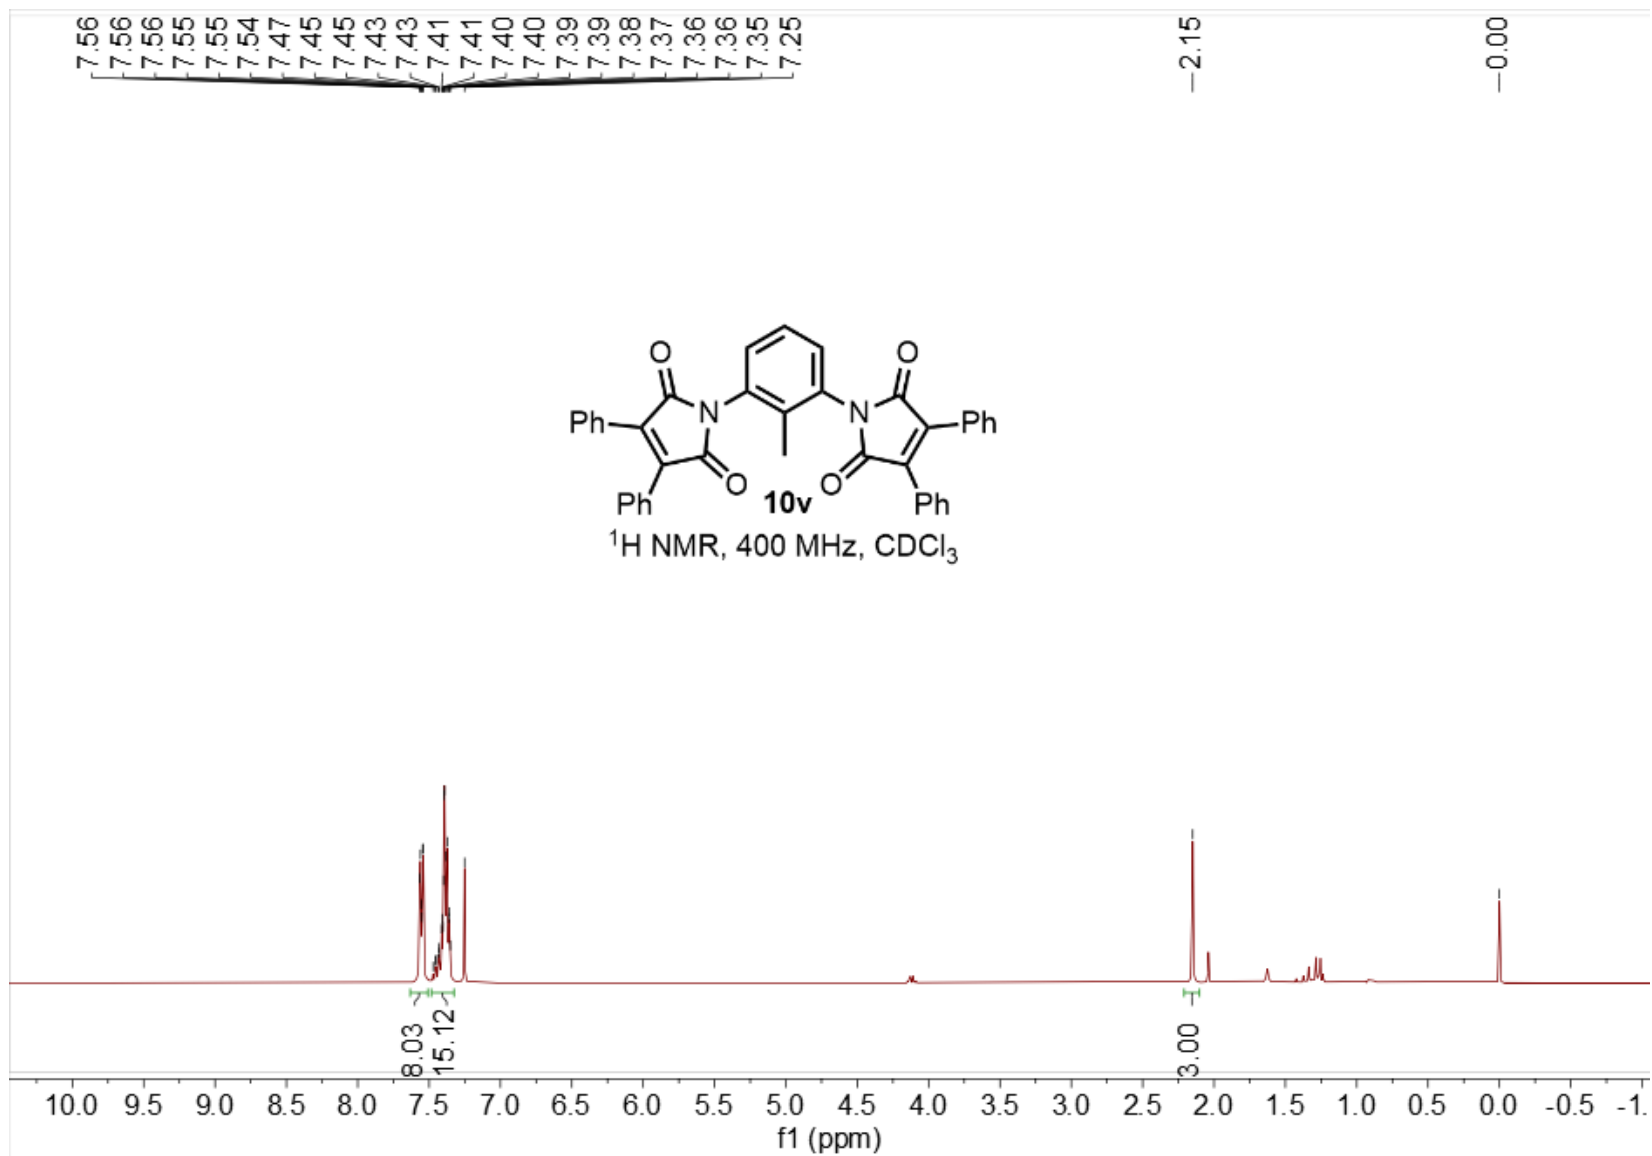

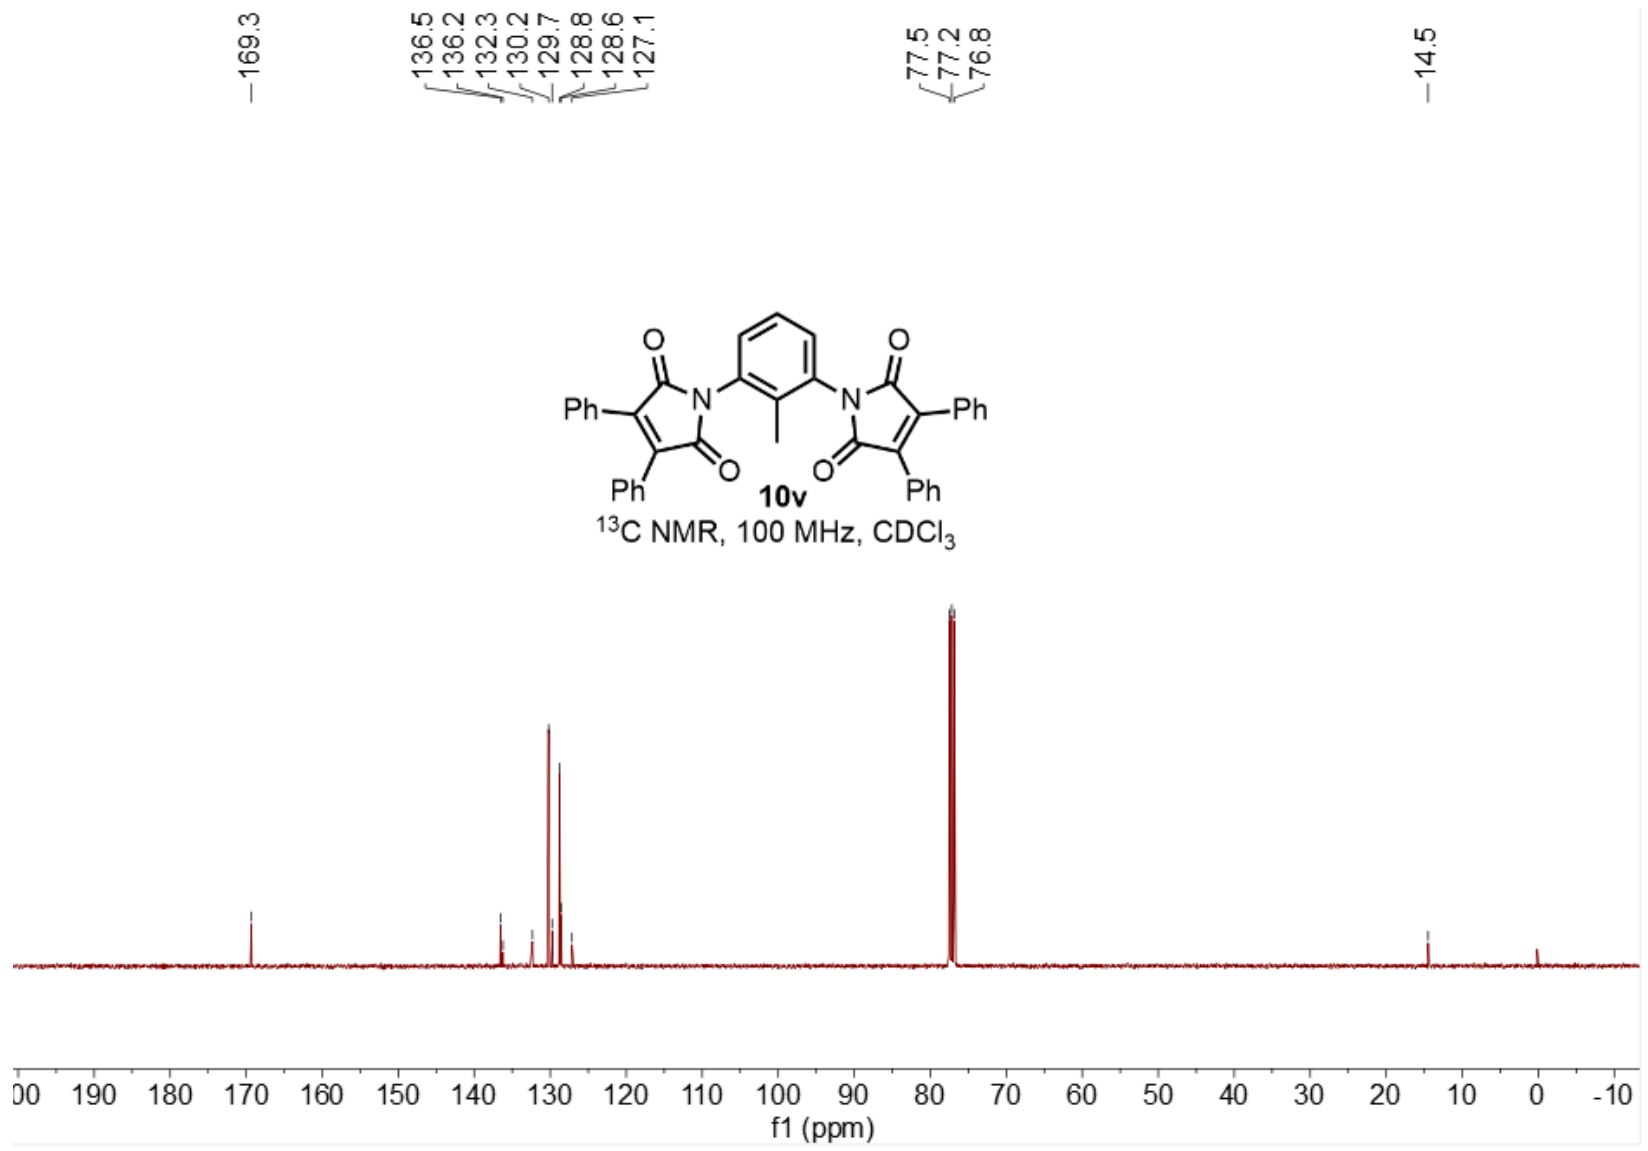

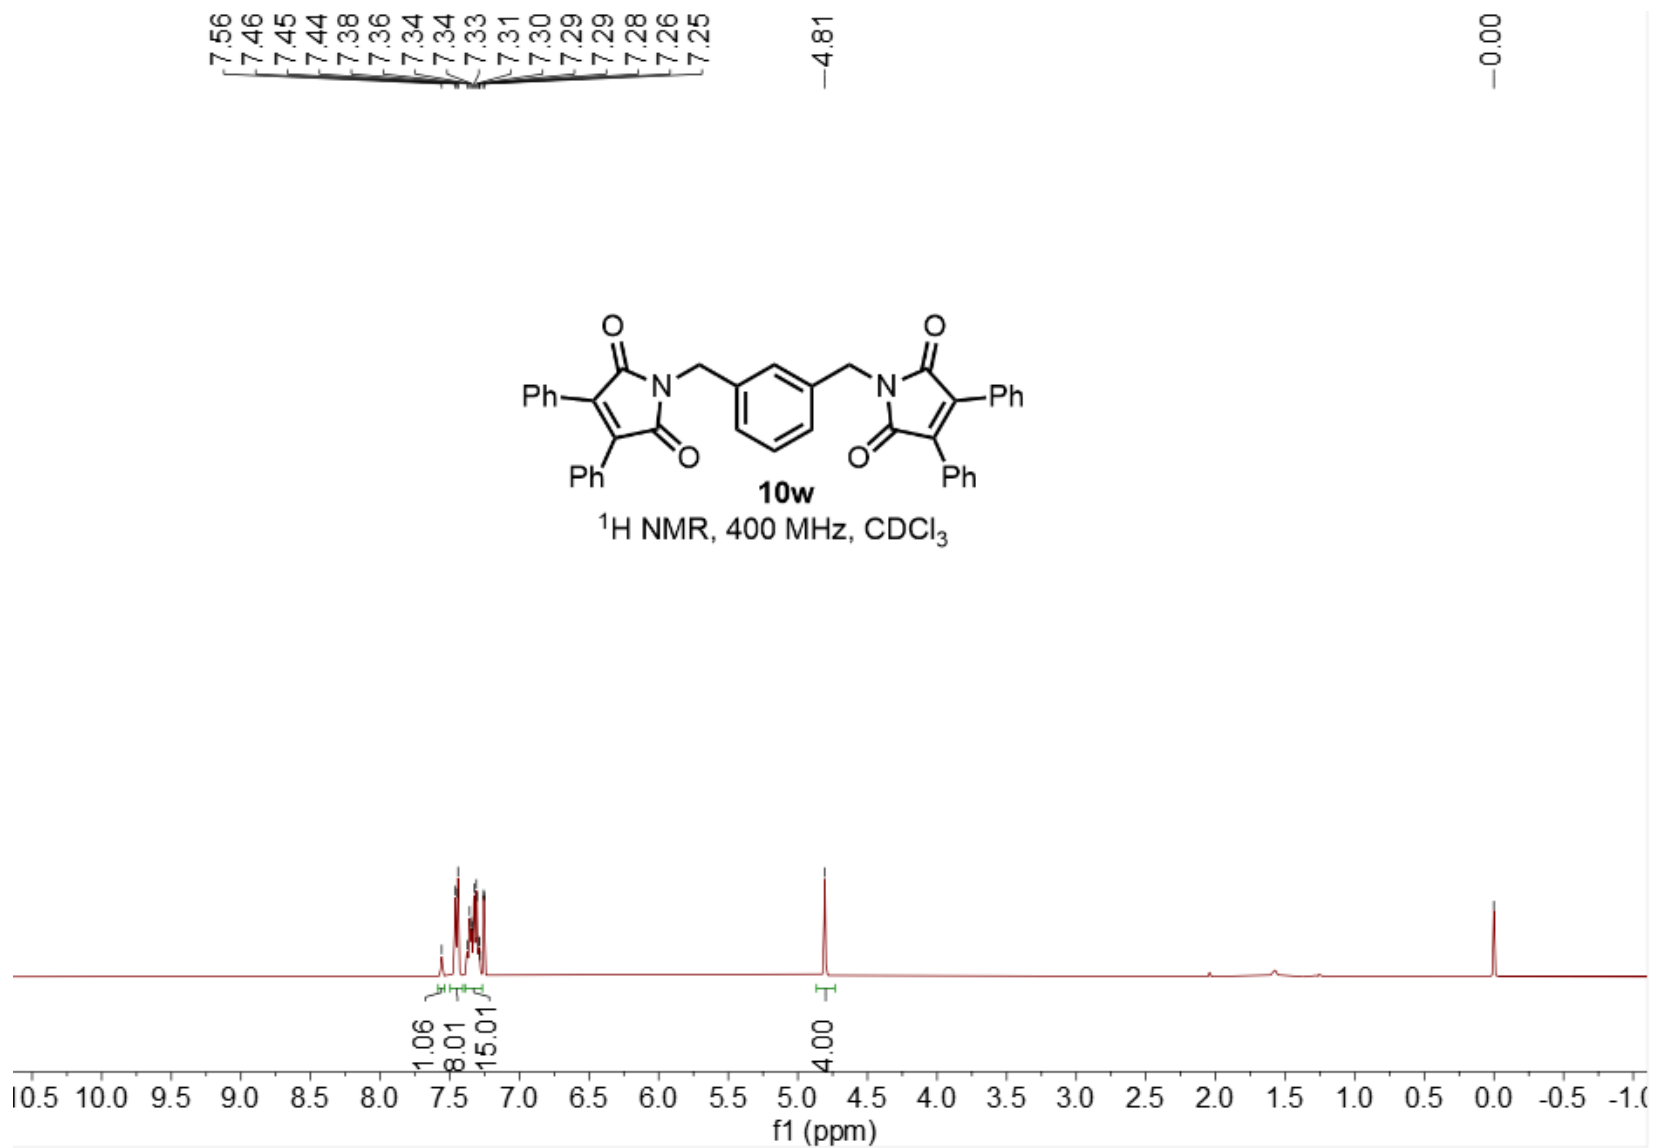

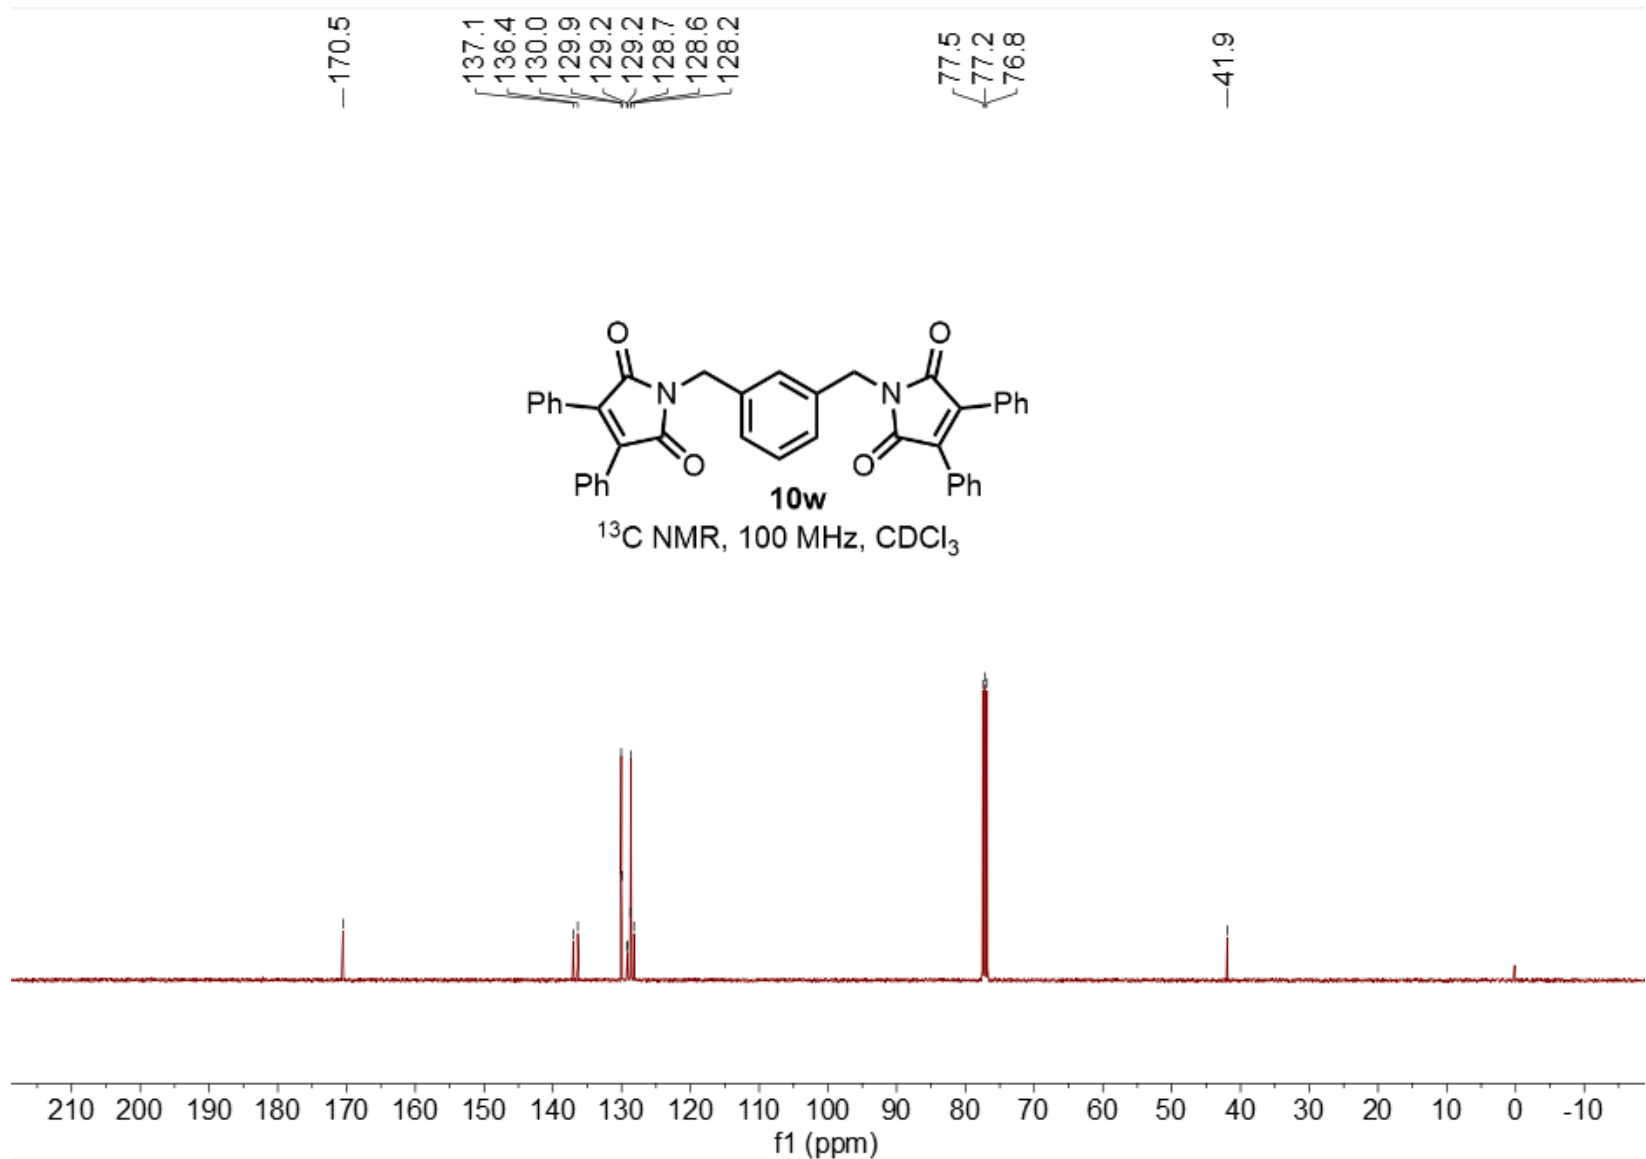





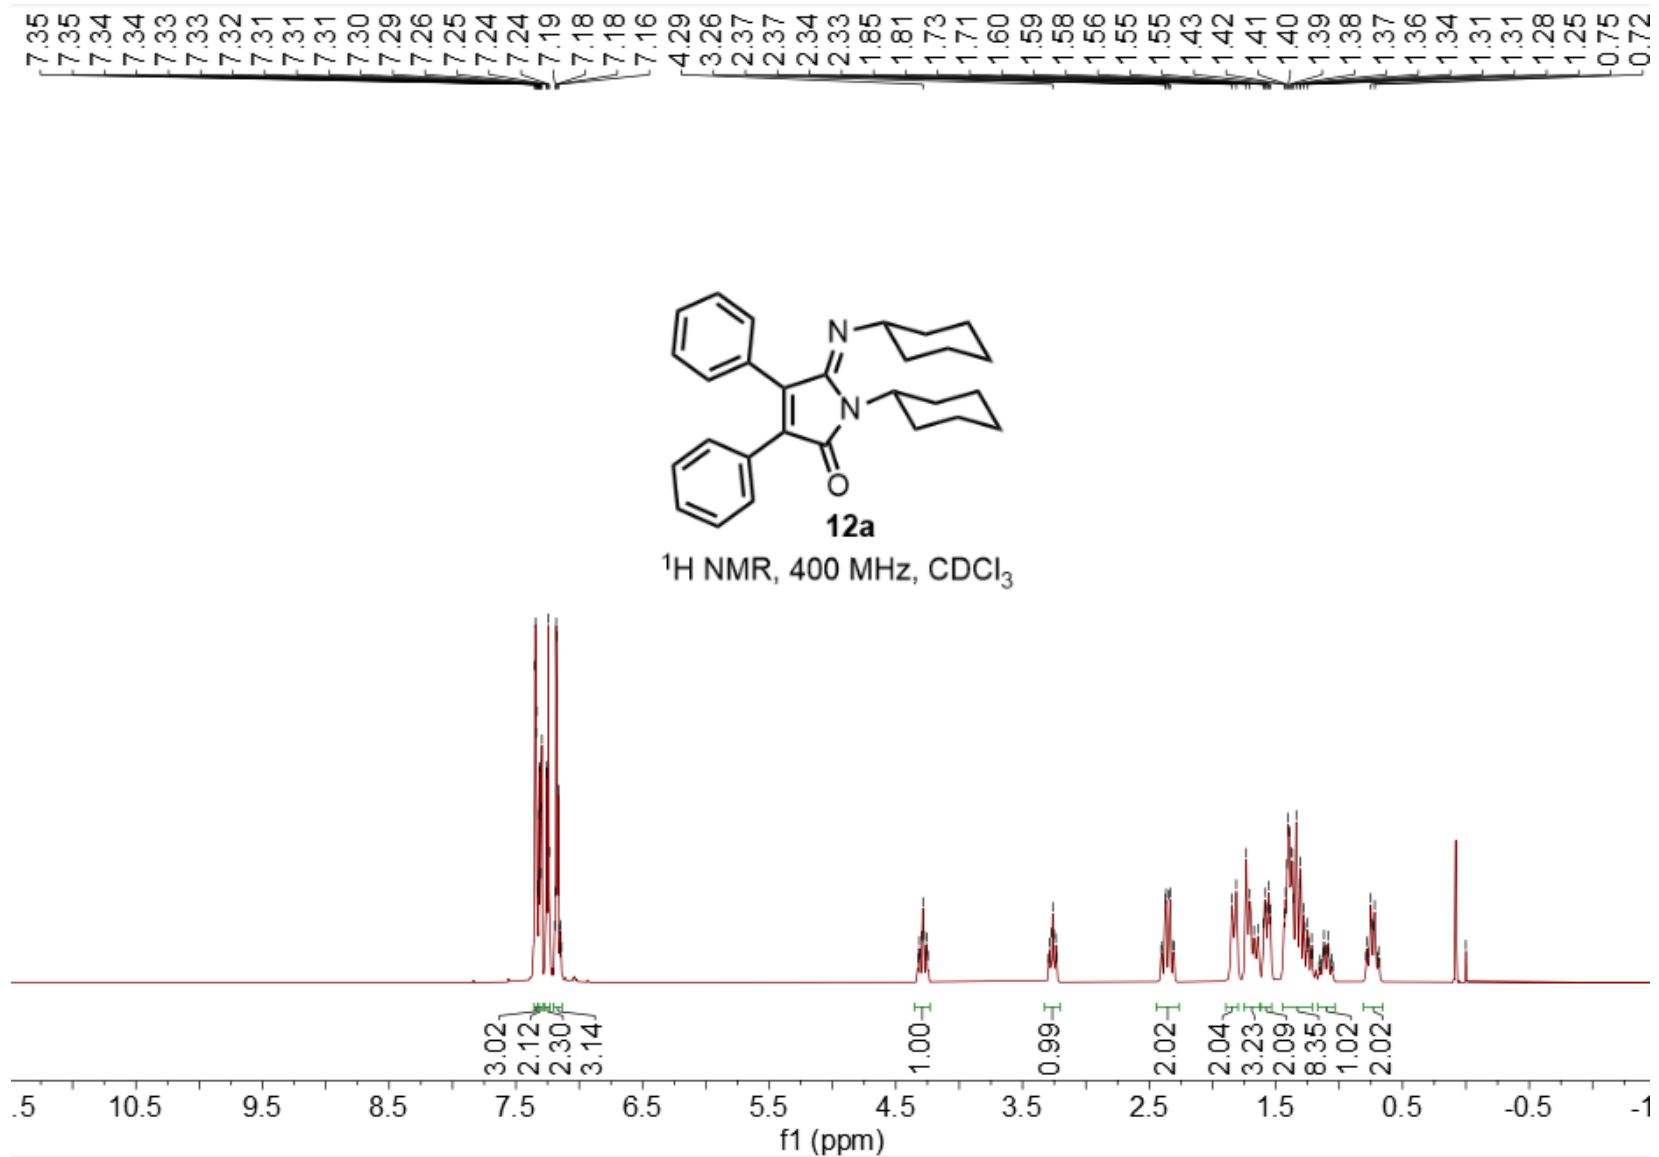

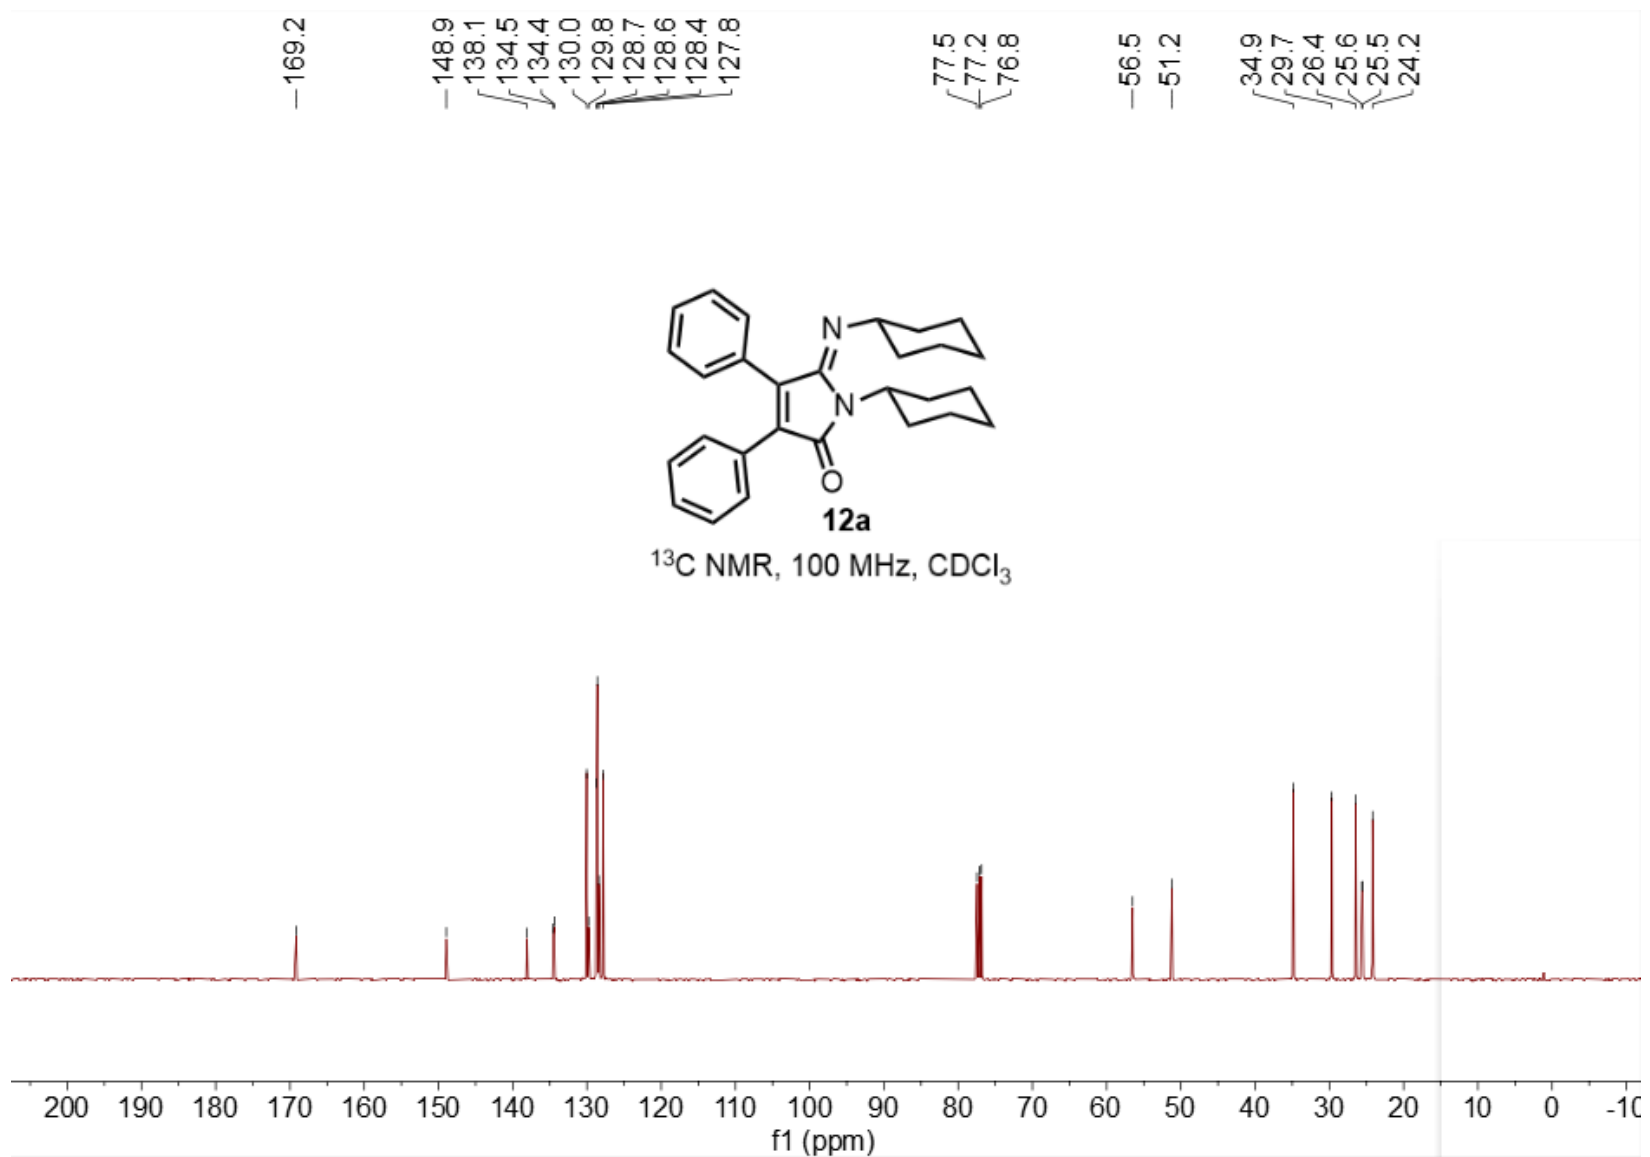

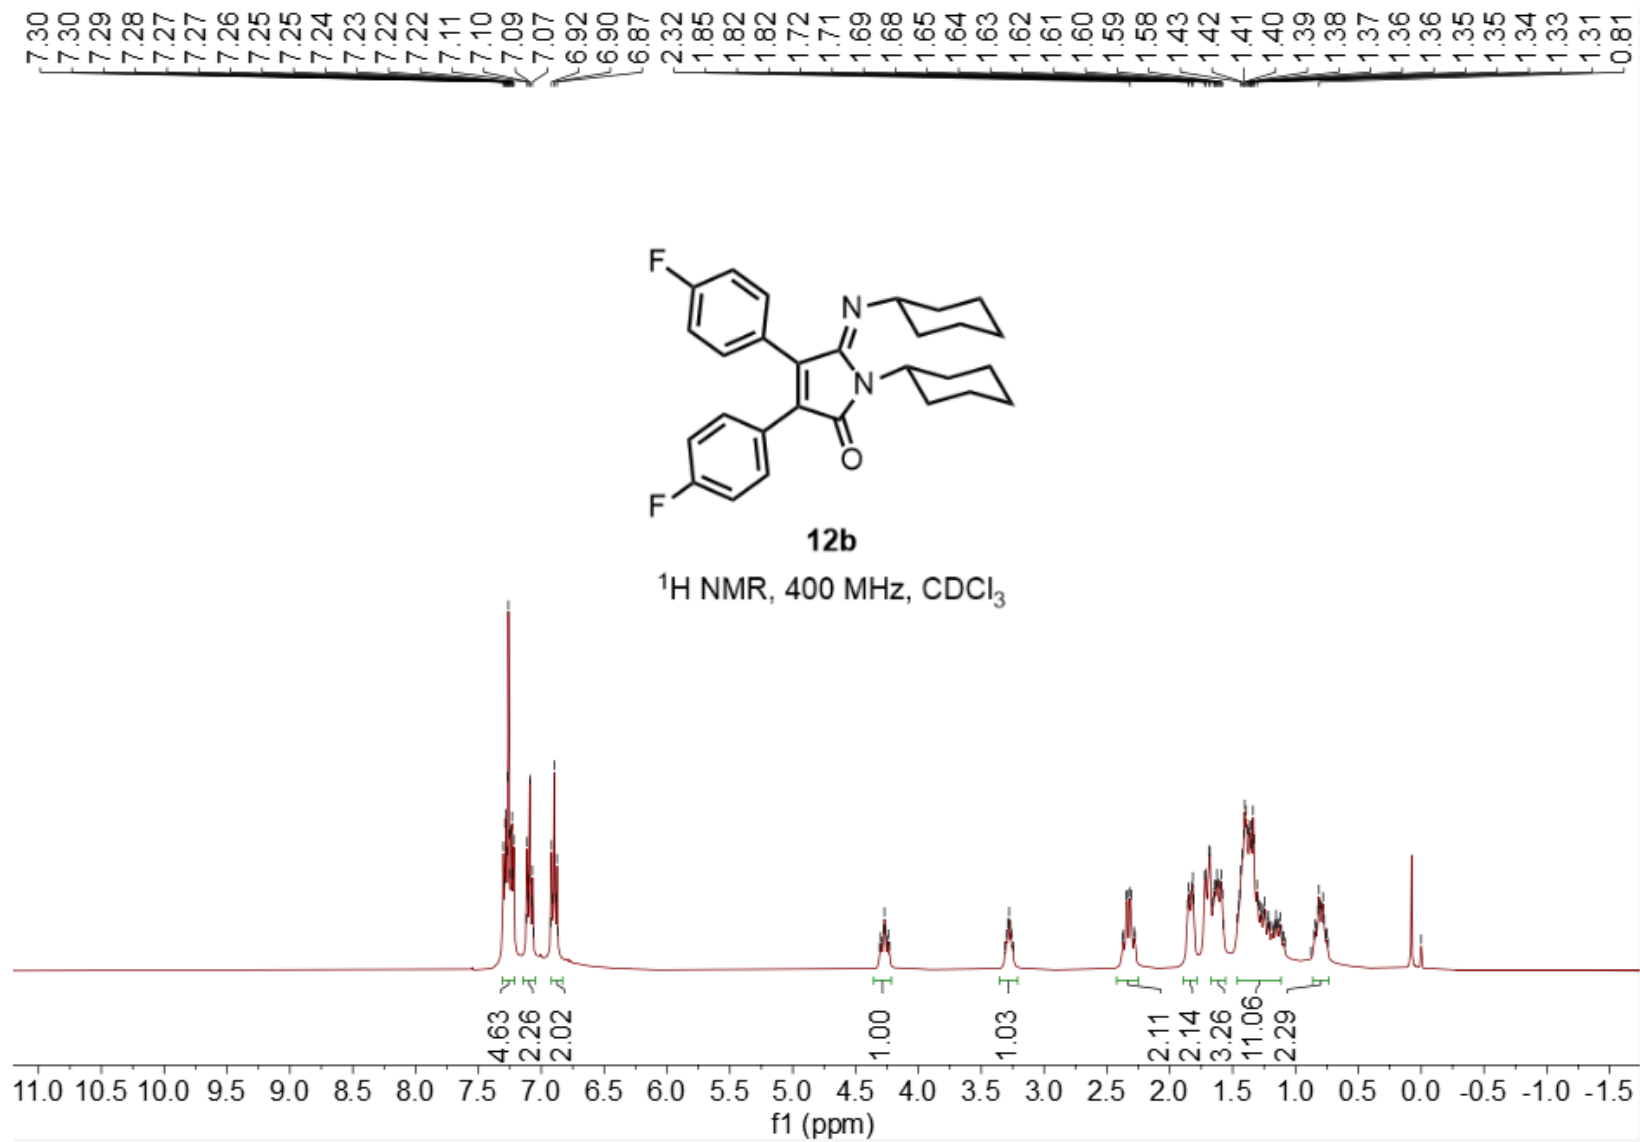

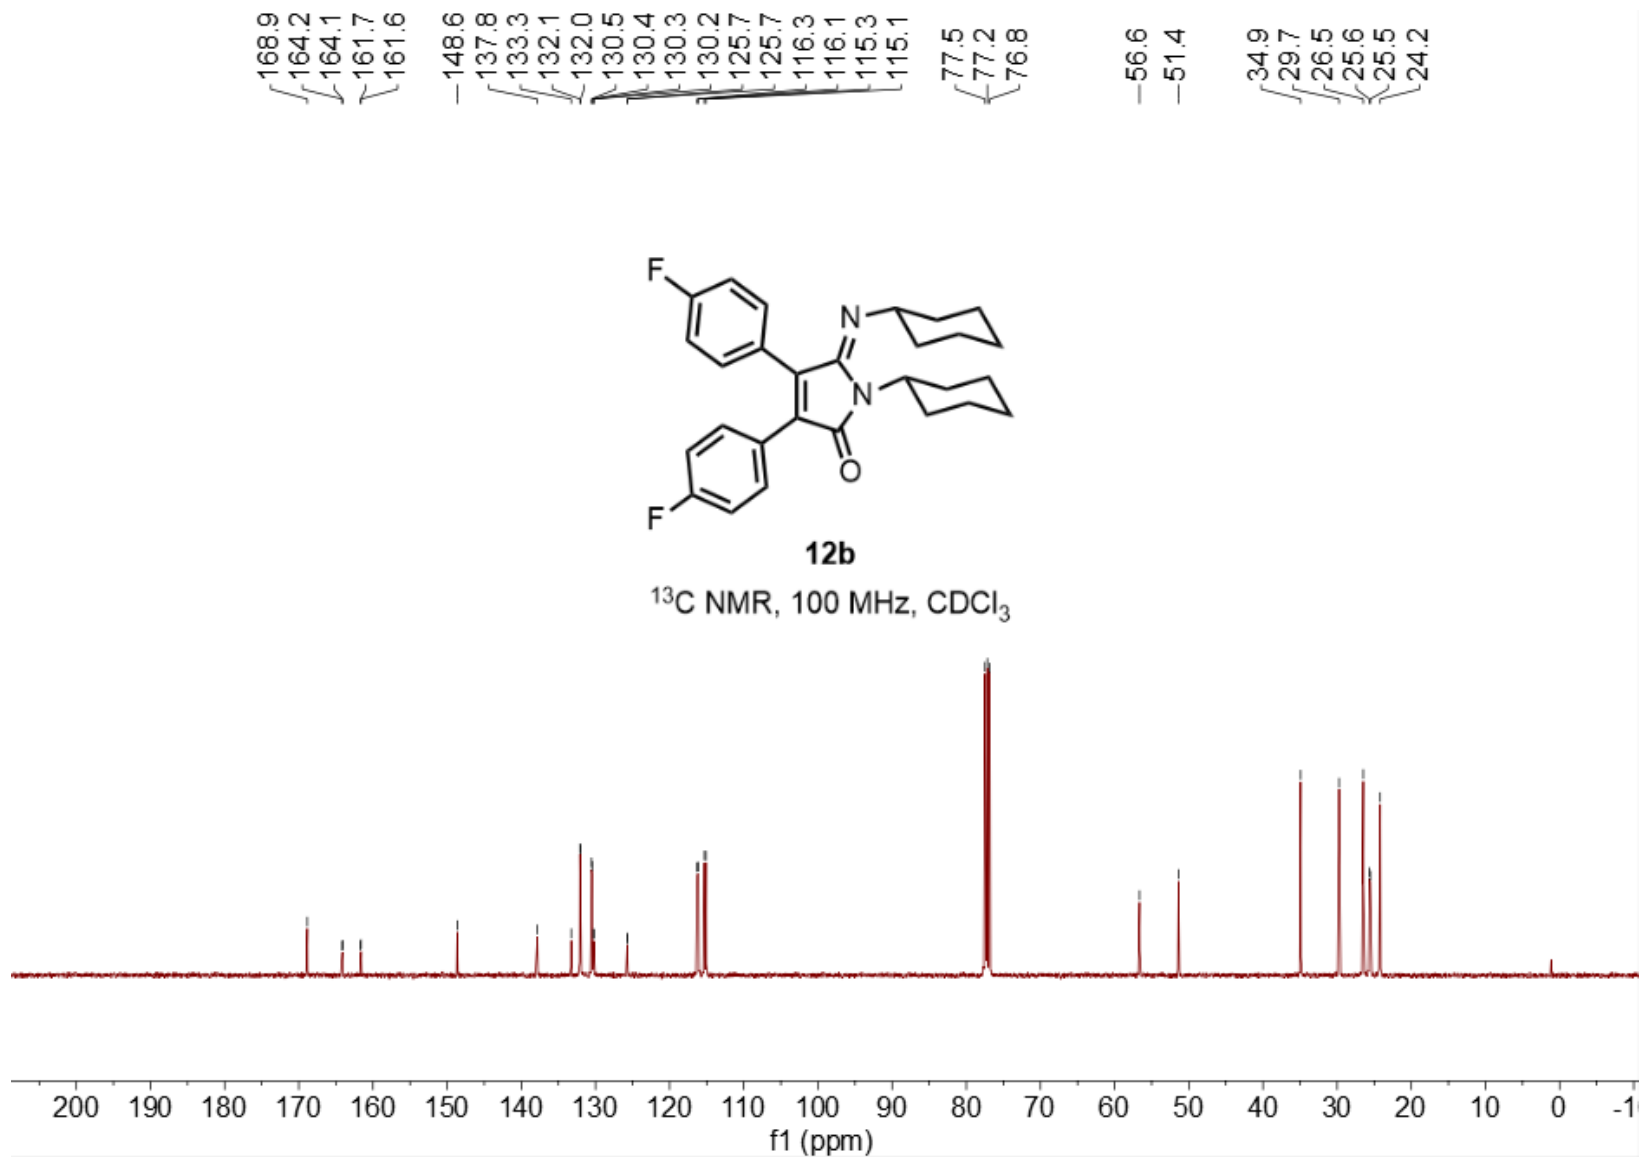

-111.6  
-112.2

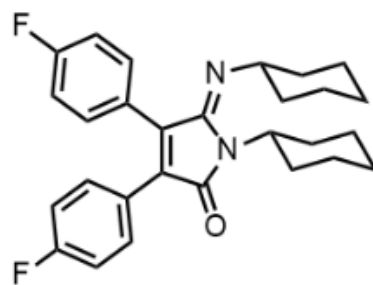

**12b**

<sup>19</sup>F NMR, 376 MHz, CDCl<sub>3</sub>

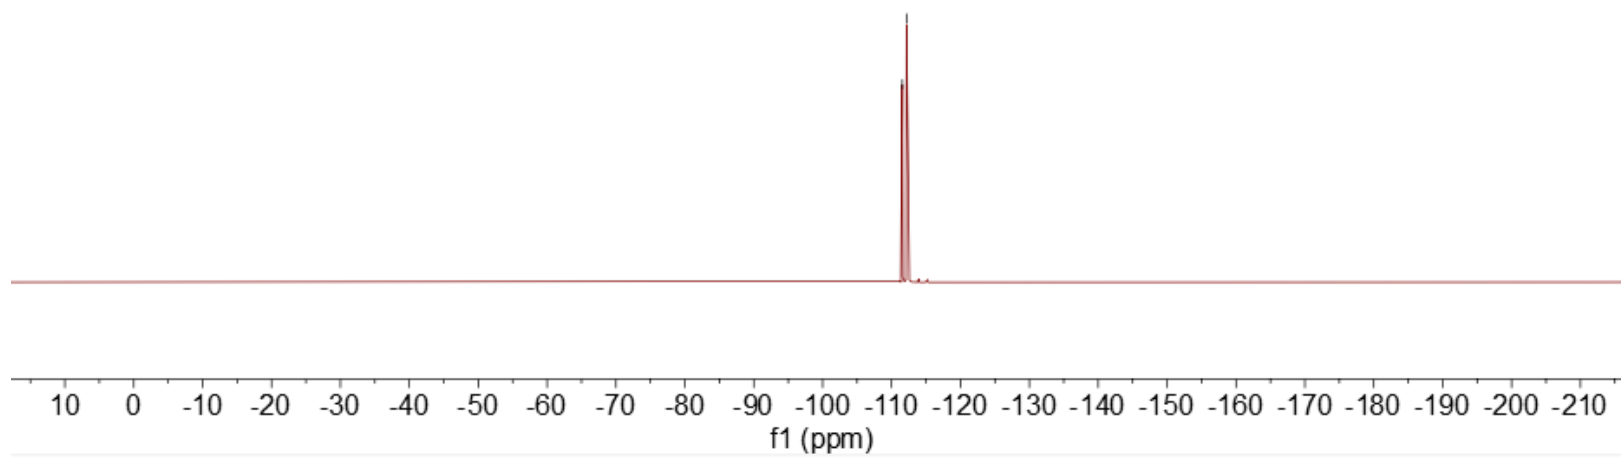

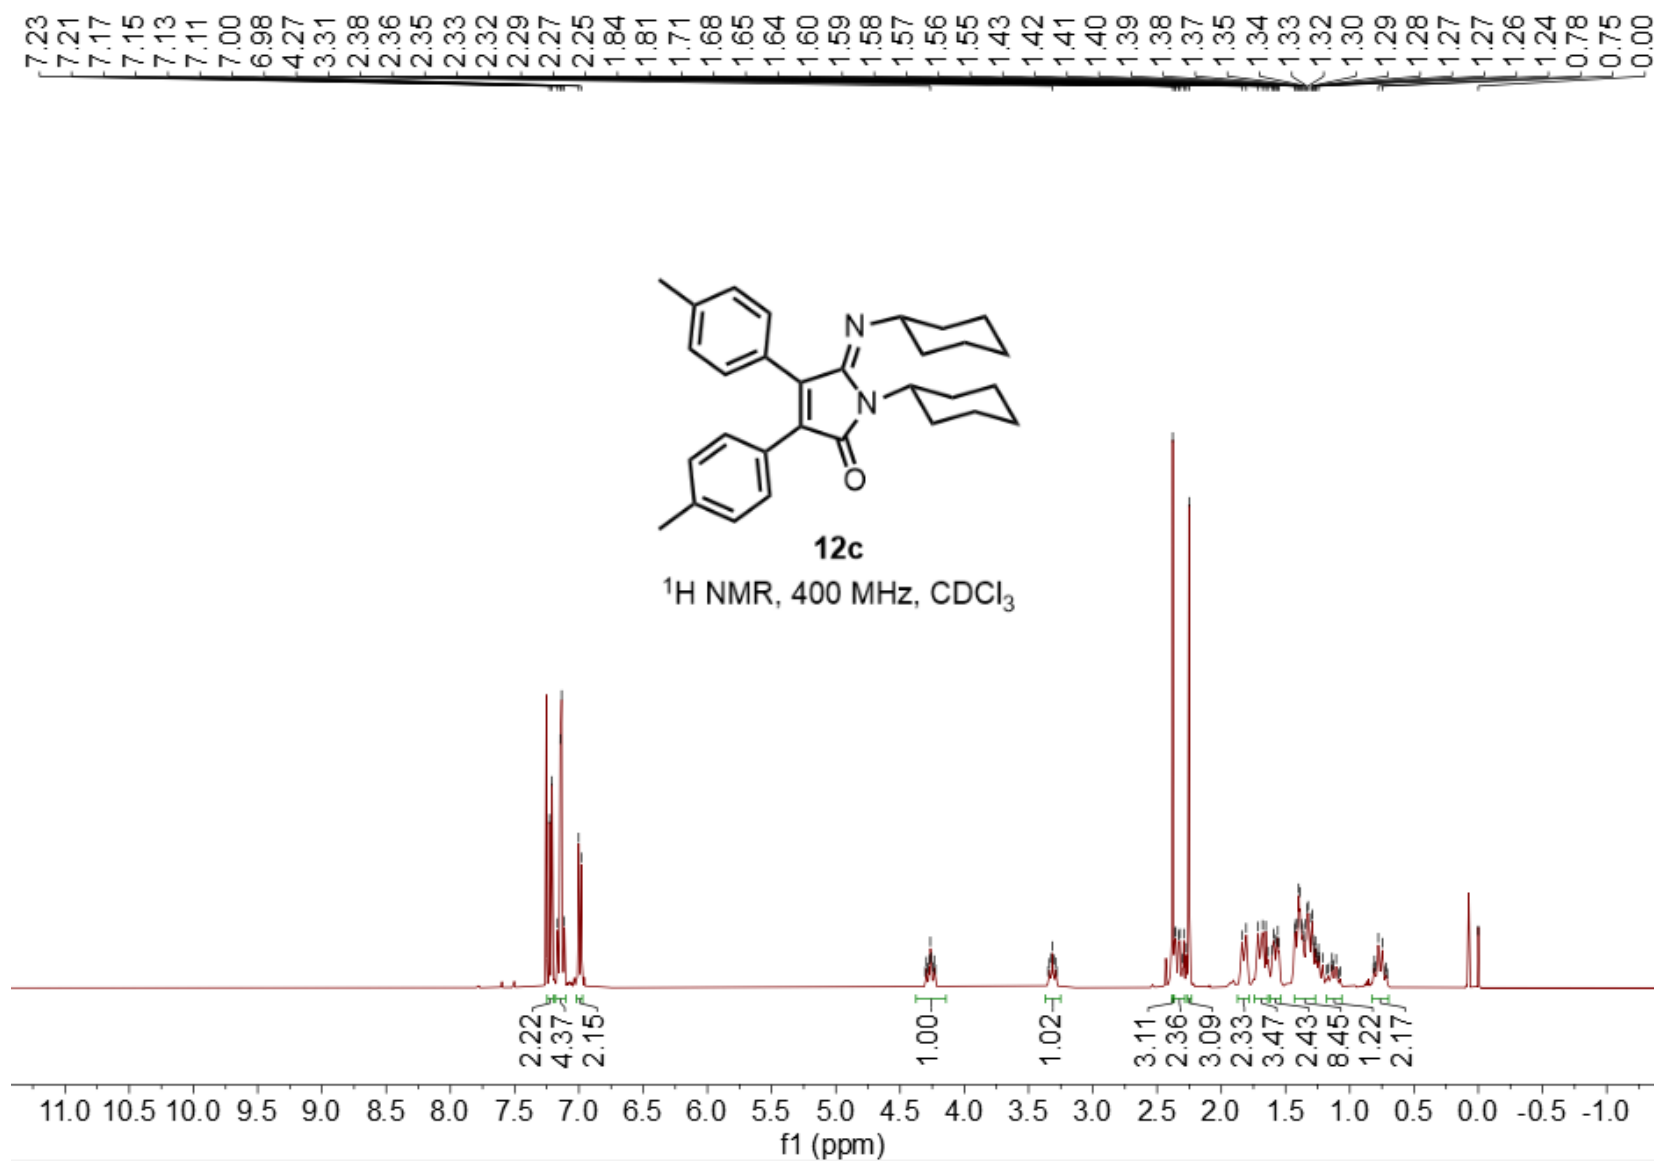

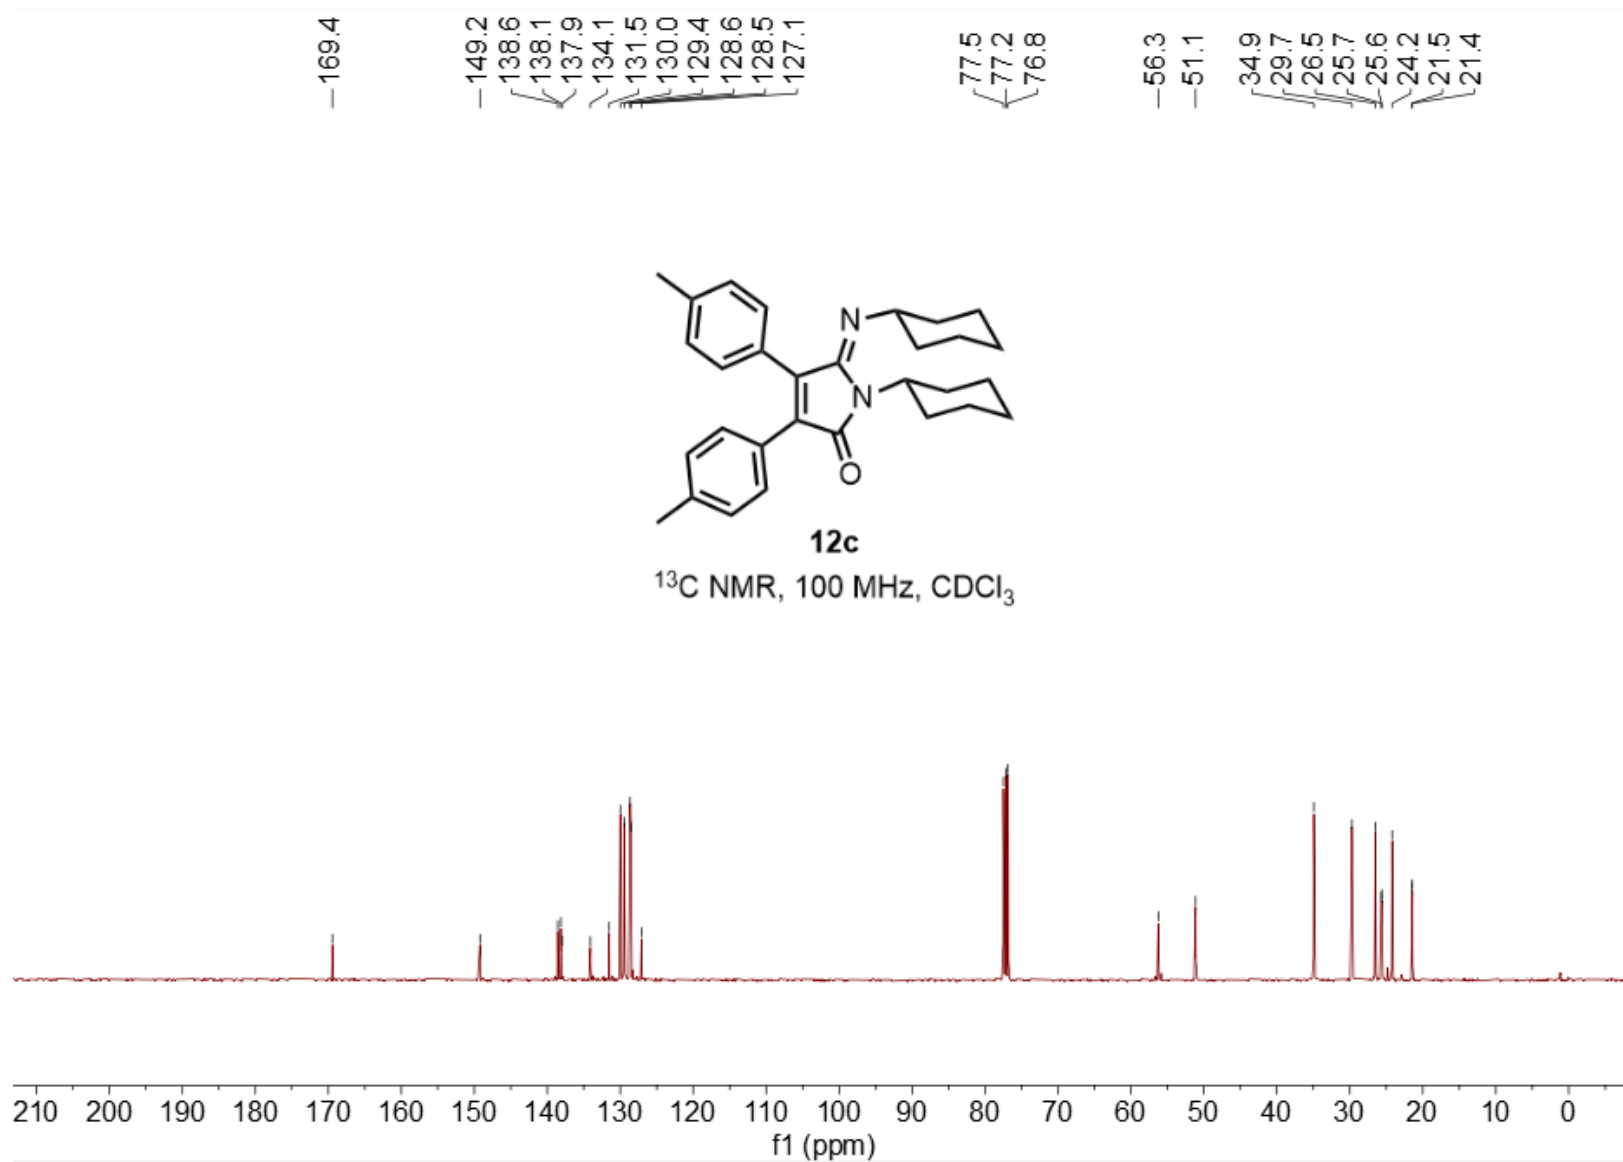

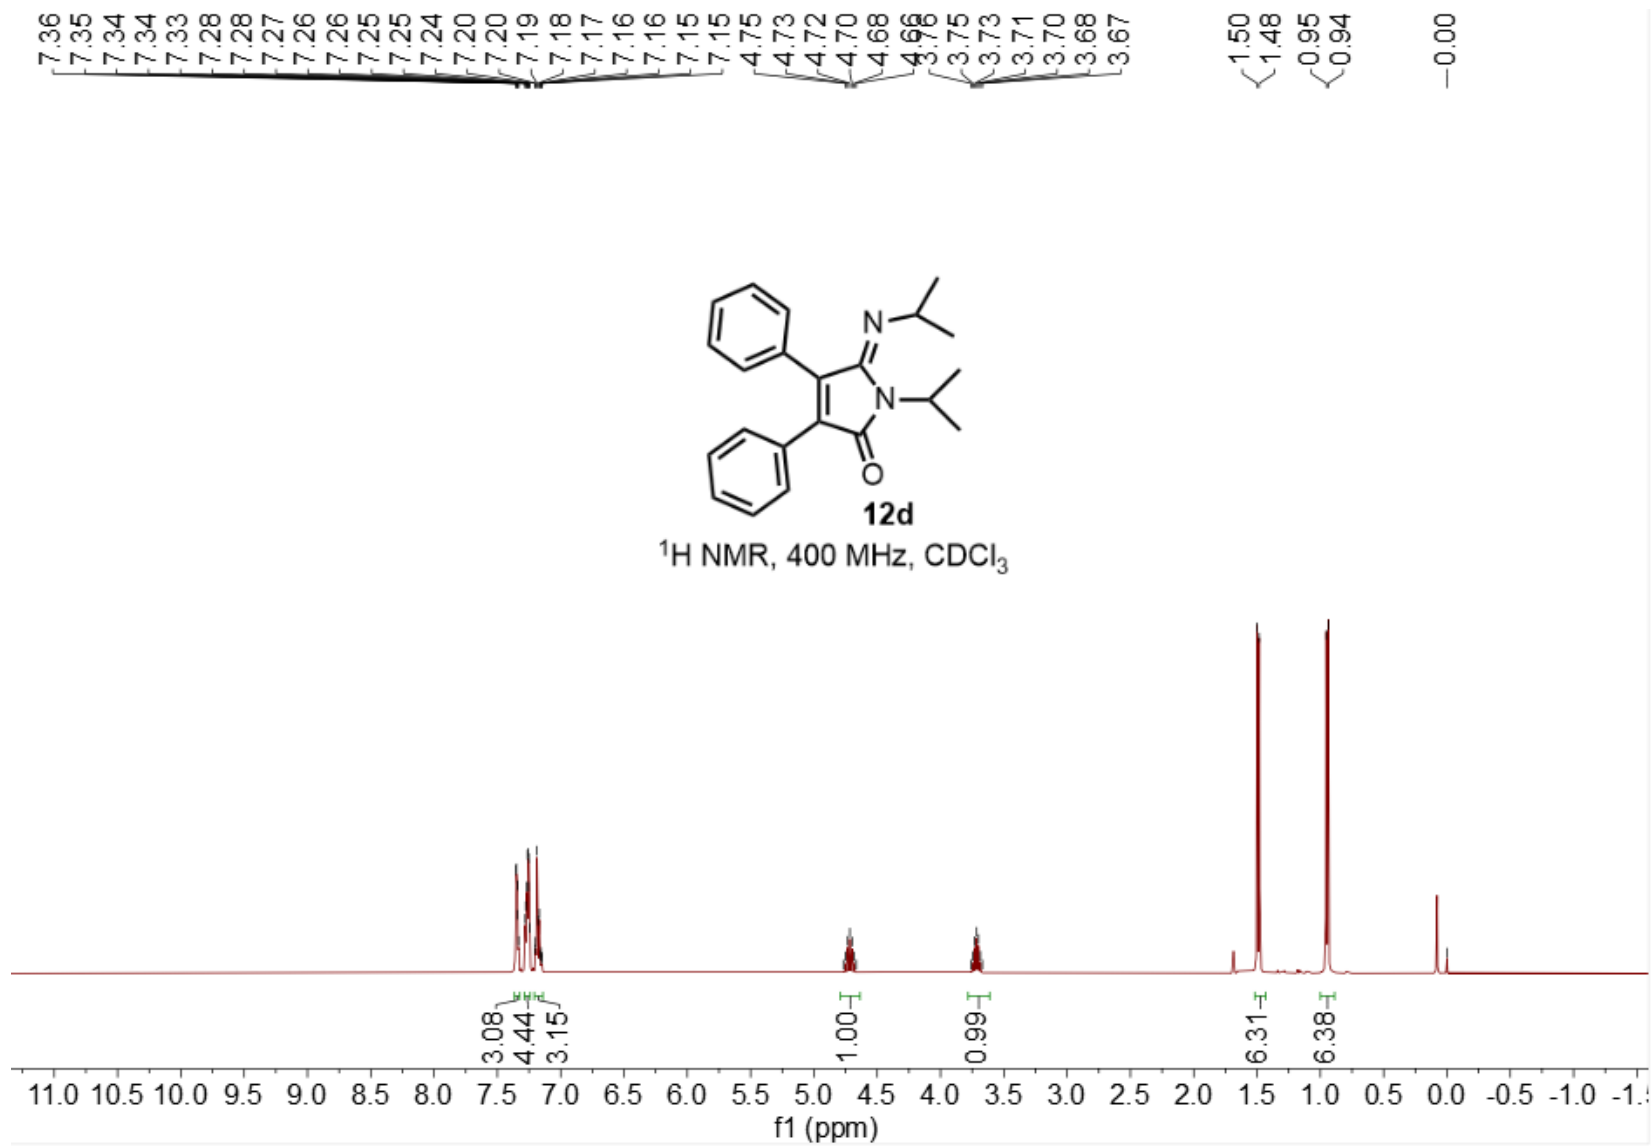



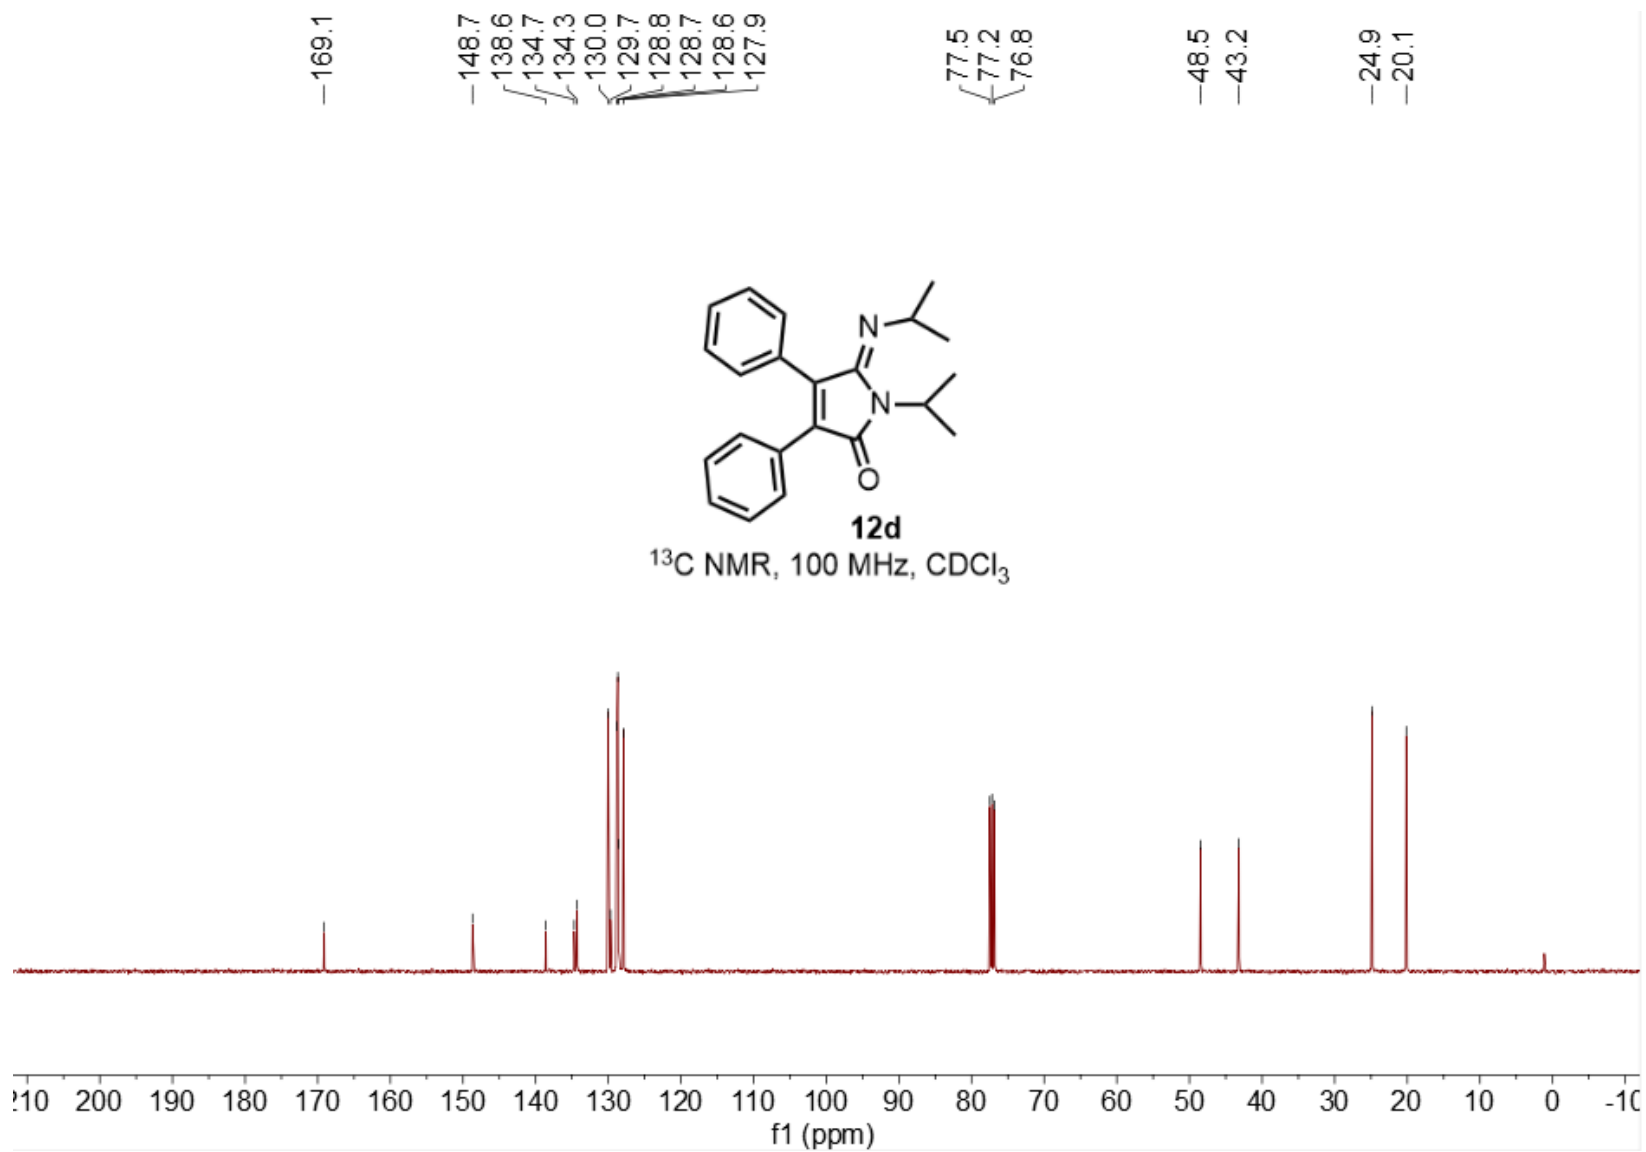

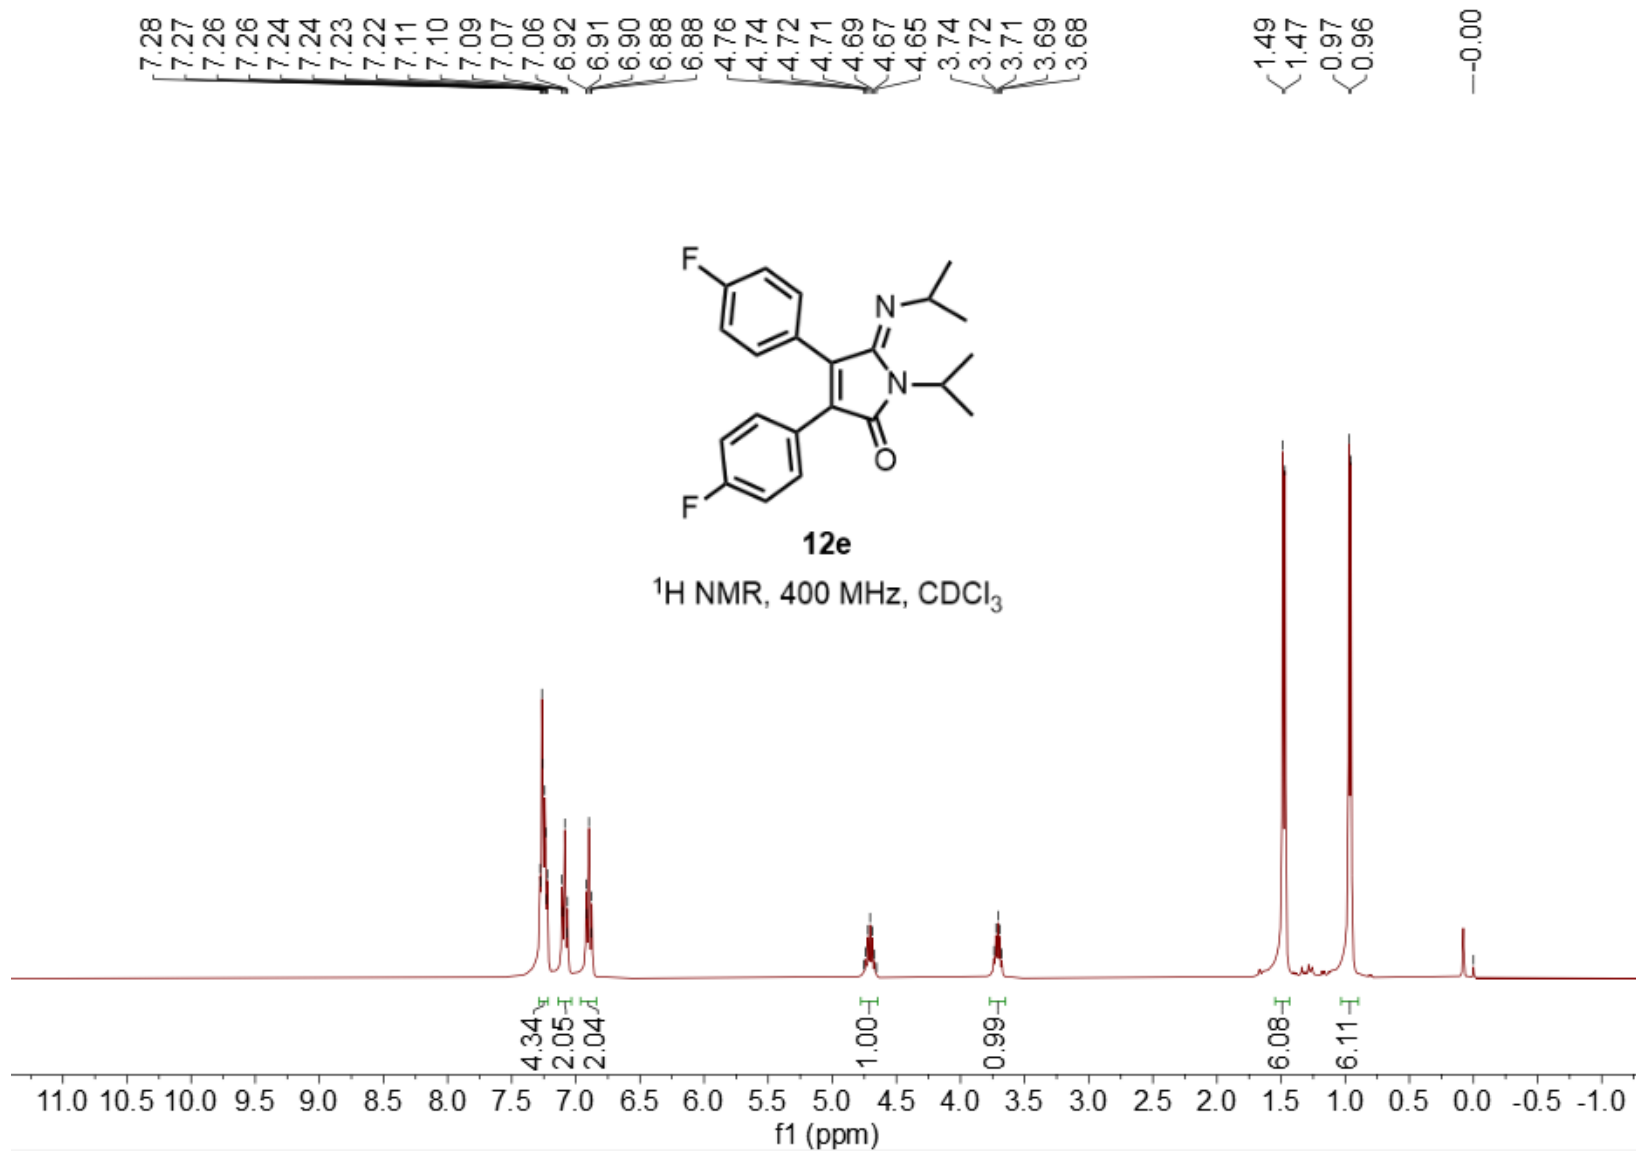

168.8  
164.2  
164.1  
161.7  
161.6  
-148.4  
138.2  
133.4  
132.1  
132.0  
130.5  
130.5  
130.1  
130.1  
125.6  
125.6  
116.4  
116.2  
115.3  
115.1  
77.5  
77.2  
76.8  
-48.5  
-43.3  
-24.9  
-20.1

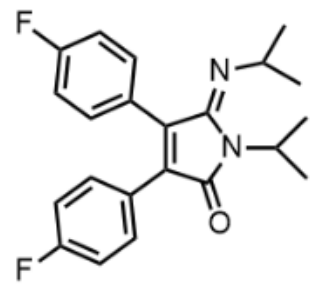

12e

<sup>13</sup>C NMR, 100 MHz, CDCl<sub>3</sub>

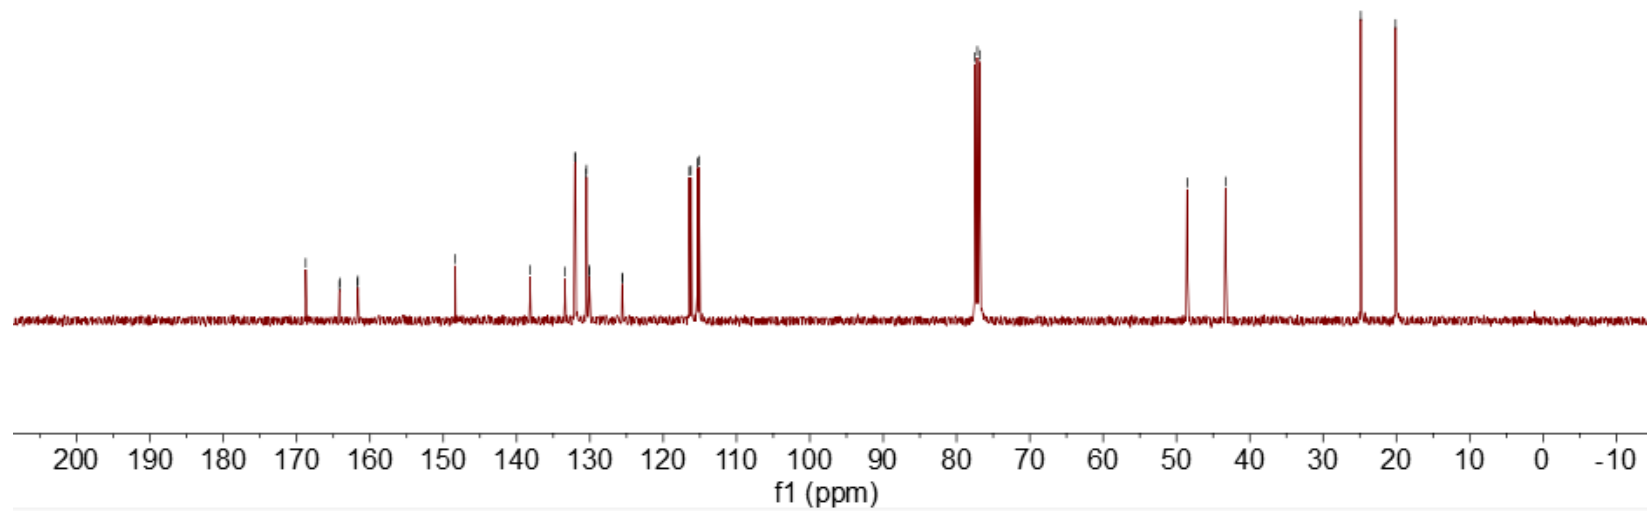

111.5  
112.0

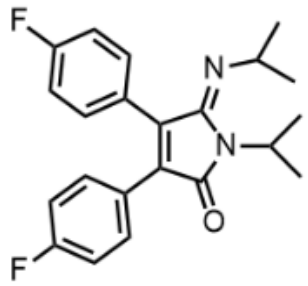

**12e**

<sup>19</sup>F NMR, 376 MHz, CDCl<sub>3</sub>

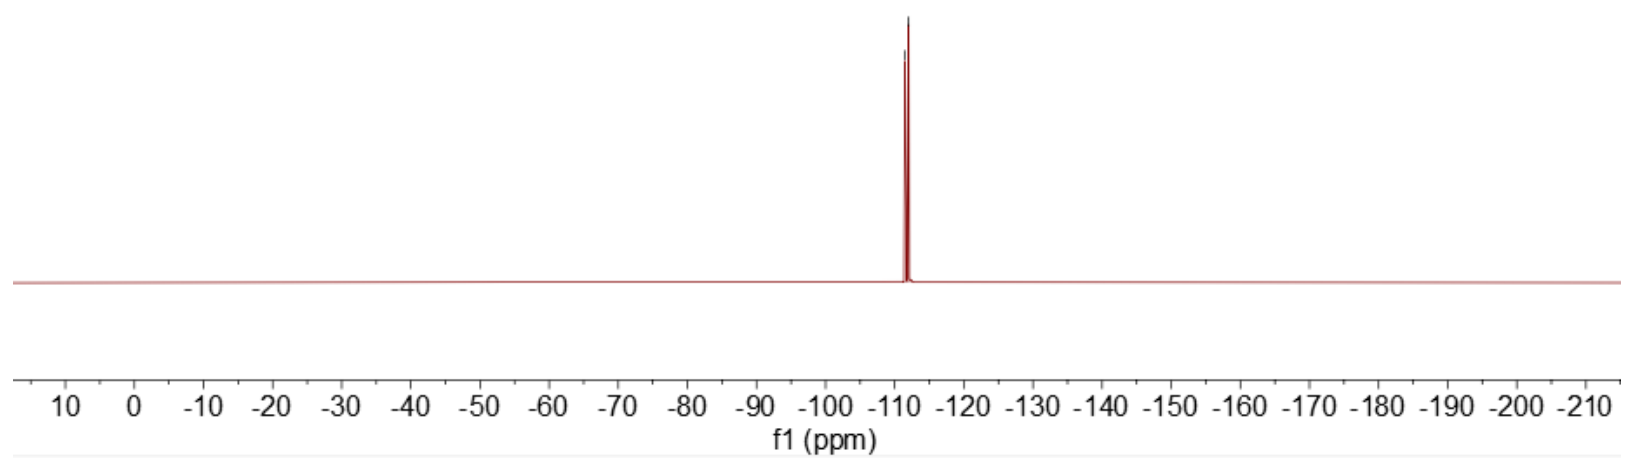

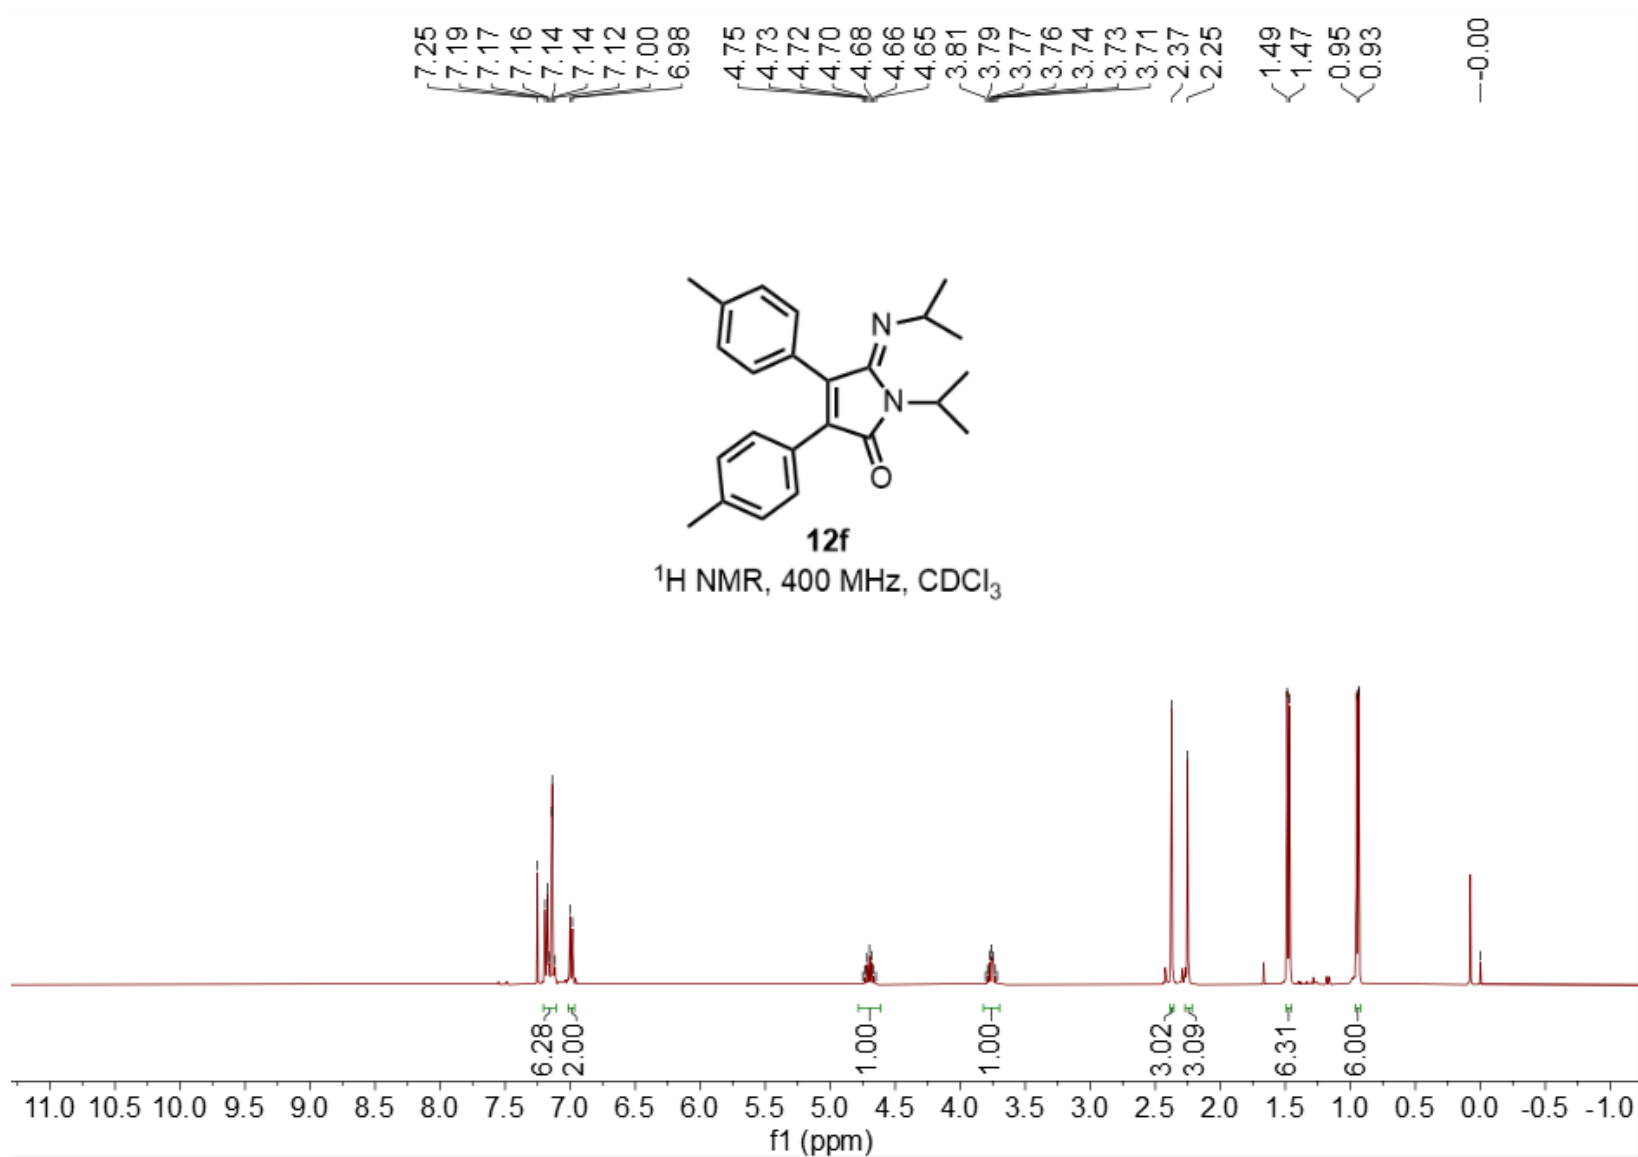

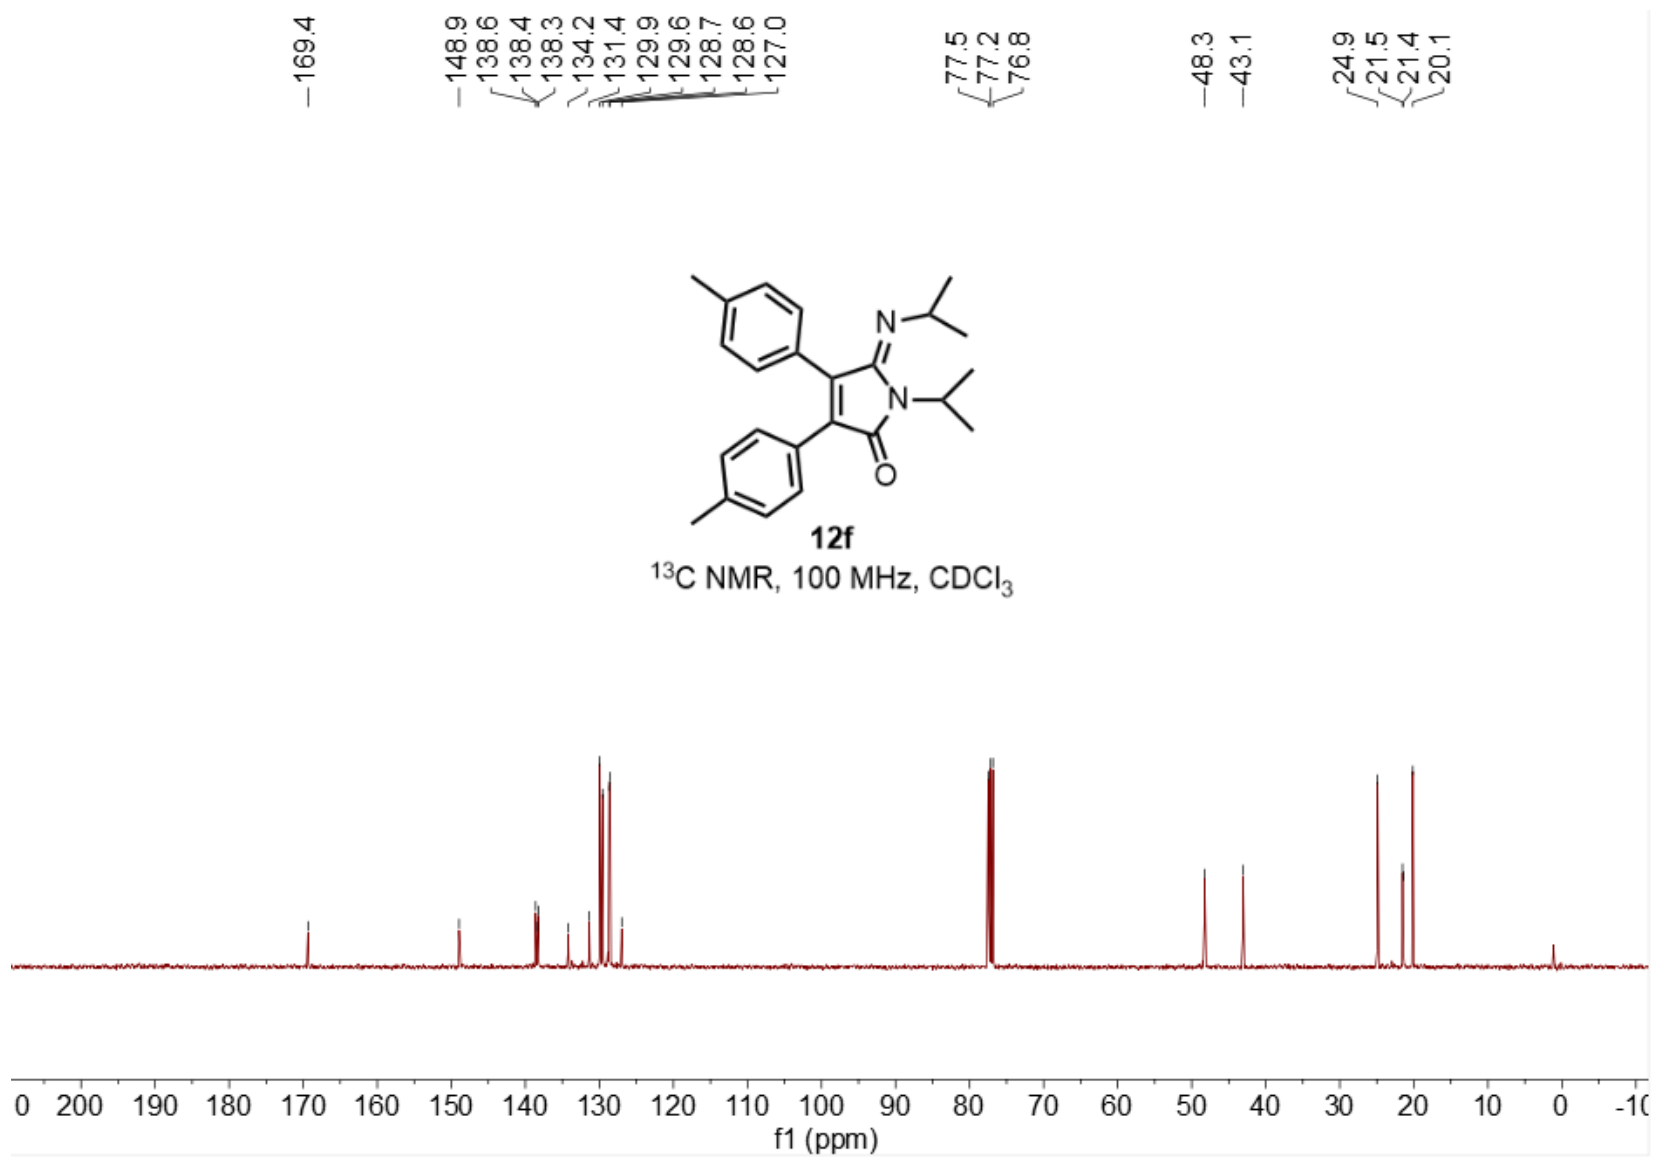

Supplement: d2sc04092a1.pdf [file d2sc04092a1.pdf]
